# Supplementary material for: TraDIS-Xpress: a high-resolution whole-genome assay identifies novel mechanisms of triclosan action and resistance
Source: Genome Res. 2020 Feb;30(2):239–49. doi: 10.1101/gr.254391.119 (PMC7050523; doi:10.1101/gr.254391.119)
Supplement: Supplemental Material [file supp_gr.254391.119_Supplement_data.xlsx]

## Sheet: README
Data are OD measurements taken over a 24 hour time period. The first column indicates strain name and the next the OD reading for each time point for each strain.
Mutanl labels indicate 'odd' or 'even' to distinguish the two mutants per gene in the KEIO collection, then replicate number (1 or 2), then gene name, then concentration of triclosan present for the readings.

## Sheet: Raw data
Mutant label ('odd' or 'even' mutant_replicate_gene name_triclosan concentration_plate number)	0	1	2	3	4	5	6	7	8	9	10	11	12	13	14	15	16	17	18	19	20	21	22	23	24
Odd_rep1_soxR0.5_p1	0.0917	0.1001	0.101	0.1017	0.1026	0.1025	0.1041	0.105	0.1051	0.1054	0.1054	0.1055	0.105	0.1044	0.1033	0.1028	0.1017	0.1002	0.0998	0.0996	0.0993	0.099	0.1013	0.1025	0.1021
Odd_rep1_fadR0.5_p1	0.0738	0.0782	0.0782	0.0783	0.0784	0.0797	0.082	0.0811	0.0815	0.0825	0.0823	0.0825	0.0832	0.0828	0.082	0.0822	0.0825	0.082	0.0818	0.0819	0.0821	0.0817	0.0828	0.0833	0.0839
Odd_rep1_frdD0.5_p1	0.0671	0.0705	0.0695	0.0687	0.0693	0.0708	0.0725	0.0729	0.0732	0.0737	0.0736	0.0739	0.0739	0.0736	0.0739	0.074	0.0739	0.0739	0.0737	0.0739	0.0737	0.0735	0.0737	0.0736	0.0732
Odd_rep1_nuoG0.5_p1	0.0639	0.068	0.0668	0.066	0.0674	0.069	0.0714	0.0719	0.0726	0.0723	0.0727	0.0734	0.0735	0.074	0.0743	0.0741	0.0751	0.0745	0.0744	0.0745	0.0749	0.0745	0.0751	0.0747	0.0746
Odd_rep1_rbsB0.5_p1	0.0672	0.0715	0.0697	0.0712	0.0741	0.0767	0.0784	0.0784	0.079	0.0792	0.0802	0.0817	0.0823	0.0819	0.0824	0.0825	0.0833	0.0828	0.0827	0.0833	0.0831	0.0828	0.0832	0.0828	0.0825
Odd_rep1_ompF0.5_p1	0.0626	0.0658	0.0647	0.0669	0.0704	0.0731	0.0746	0.0751	0.0759	0.0758	0.0762	0.0766	0.0764	0.0764	0.0764	0.0766	0.0771	0.0772	0.077	0.0771	0.0774	0.0777	0.078	0.0777	0.0773
Odd_rep1_fadL0.5_p1	0.0577	0.0587	0.0587	0.0618	0.0651	0.0682	0.0698	0.0696	0.0701	0.0704	0.0703	0.0704	0.0698	0.0698	0.0701	0.0698	0.0704	0.0704	0.0702	0.0703	0.0705	0.0705	0.0708	0.0705	0.0701
Odd_rep1_lon0.5_p1	0.0583	0.0581	0.0592	0.0614	0.0644	0.067	0.0683	0.0682	0.0686	0.0683	0.0687	0.0685	0.0685	0.0683	0.0685	0.0683	0.0684	0.0685	0.068	0.0685	0.0685	0.0685	0.0705	0.0741	0.0836
Odd_rep1_prc0.5_p1	0.0588	0.0572	0.0599	0.063	0.0664	0.0696	0.0707	0.0699	0.0702	0.0701	0.0704	0.0702	0.0698	0.0698	0.0696	0.0693	0.07	0.0705	0.0707	0.0708	0.0711	0.071	0.0715	0.0712	0.0711
Odd_rep1_mrcA0.5_p1	0.0659	0.064	0.0669	0.0701	0.0727	0.0754	0.0771	0.0772	0.0775	0.0775	0.0776	0.0776	0.0774	0.0772	0.077	0.0771	0.0777	0.0775	0.0779	0.0779	0.0782	0.0778	0.0784	0.0785	0.0783
Odd_rep1_yehK0.5_p1	0.0637	0.0642	0.0683	0.0722	0.0756	0.0783	0.0785	0.0759	0.0763	0.0771	0.0769	0.0774	0.0773	0.0779	0.0781	0.0776	0.078	0.0775	0.0773	0.0774	0.078	0.0783	0.0784	0.0786	0.0776
Odd_rep1_ybfQ0.5_p1	0.0629	0.0603	0.0653	0.0694	0.073	0.0751	0.0772	0.0778	0.0784	0.0784	0.0786	0.0781	0.0779	0.0776	0.0773	0.077	0.0773	0.0765	0.0756	0.0758	0.0759	0.0754	0.076	0.0761	0.0762
Odd_rep1_truD0.5_p1	0.0608	0.058	0.0625	0.0675	0.0705	0.0755	0.0782	0.0789	0.0808	0.0804	0.0815	0.0806	0.0808	0.0791	0.0779	0.0775	0.0777	0.0774	0.0773	0.0771	0.0775	0.0774	0.0778	0.0778	0.0775
Odd_rep1_mprA0.5_p1	0.0839	0.0815	0.0869	0.0905	0.0946	0.097	0.0991	0.0991	0.1009	0.101	0.1022	0.1022	0.1023	0.1024	0.1024	0.1018	0.1023	0.1017	0.1021	0.102	0.1014	0.1019	0.1023	0.1021	0.1026
Odd_rep1_ubiF0.5_p1	0.0616	0.0588	0.0633	0.0671	0.07	0.0725	0.0745	0.0745	0.0748	0.0751	0.0758	0.0759	0.0761	0.0754	0.076	0.0761	0.0767	0.0767	0.0767	0.077	0.0773	0.0774	0.0777	0.078	0.0775
Odd_rep1_ybeX0.5_p1	0.0576	0.0544	0.0594	0.0627	0.0657	0.0693	0.0705	0.0705	0.0706	0.0702	0.071	0.0715	0.0716	0.0713	0.0714	0.0712	0.0713	0.0708	0.0712	0.0709	0.071	0.0709	0.0712	0.0709	0.0709
Odd_rep1_rep0.5_p1	0.0632	0.0601	0.0646	0.0687	0.0722	0.0763	0.0781	0.0784	0.0784	0.079	0.0791	0.0789	0.0793	0.0786	0.0784	0.0779	0.0782	0.0777	0.0769	0.0773	0.0772	0.0768	0.0772	0.0768	0.0764
Odd_rep1_fadD0.5_p1	0.0606	0.0572	0.0622	0.0657	0.07	0.0721	0.0739	0.0736	0.0743	0.0742	0.0743	0.0744	0.0746	0.0745	0.0739	0.074	0.0745	0.0747	0.0747	0.0749	0.0751	0.0749	0.0752	0.0748	0.0749
Odd_rep1_ydjO0.5_p1	0.061	0.0573	0.0627	0.066	0.0701	0.0733	0.0751	0.075	0.0751	0.0756	0.0752	0.0759	0.0765	0.0762	0.0763	0.076	0.0762	0.0758	0.0756	0.0754	0.0754	0.0752	0.0753	0.0748	0.0746
Odd_rep1_yedN0.5_p1	0.0577	0.0543	0.0589	0.0631	0.0671	0.0698	0.0712	0.0714	0.0714	0.072	0.0724	0.0728	0.0732	0.0729	0.073	0.0727	0.0732	0.073	0.0728	0.0733	0.0737	0.0733	0.074	0.0742	0.0744
Odd_rep1_yhbJ0.5_p1	0.0602	0.0557	0.0615	0.065	0.0683	0.0709	0.0723	0.0724	0.0728	0.0734	0.0741	0.0751	0.0761	0.077	0.0814	0.0955	0.1676	0.2947	0.3829	0.5383	0.7575	0.9594	1.0638	1.2268	1.4204
Odd_rep1_BW0.5_p1	0.0537	0.0499	0.0562	0.0599	0.064	0.0666	0.068	0.0685	0.0688	0.069	0.069	0.069	0.0691	0.0686	0.0686	0.0678	0.0682	0.0679	0.0679	0.0678	0.0678	0.0675	0.0681	0.0676	0.0675
Odd_rep1_MG0.5_p1	0.0538	0.0506	0.0553	0.0589	0.0627	0.0667	0.0708	0.0718	0.0723	0.072	0.0723	0.0725	0.0722	0.0713	0.071	0.0703	0.0697	0.069	0.0689	0.0696	0.0702	0.0697	0.0701	0.0701	0.0695
Odd_rep1_Tric-resistant0.5_p1	0.0669	0.0625	0.0671	0.0713	0.0767	0.0799	0.0819	0.0825	0.082	0.0819	0.0822	0.0821	0.0815	0.0808	0.0809	0.08	0.0802	0.0794	0.0782	0.0783	0.0783	0.0784	0.0787	0.0782	0.078
Odd_rep1_soxR0.125_p1	0.0546	0.0511	0.0562	0.0604	0.0642	0.0696	0.0896	0.1905	0.6333	1.0058	1.2527	1.4113	1.5397	1.6472	1.7604	1.8587	1.8848	1.9004	1.9194	1.9424	1.9581	1.9767	1.9864	1.9906	1.9956
Odd_rep1_fadR0.125_p1	0.055	0.0518	0.0574	0.0631	0.0707	0.0878	0.1518	0.4532	0.9511	1.2289	1.4112	1.5023	1.6003	1.6941	1.7789	1.8503	1.8779	1.8948	1.9182	1.9347	1.9461	1.9601	1.9714	1.9685	1.9767
Odd_rep1_frdD0.125_p1	0.057	0.0538	0.0592	0.0634	0.0672	0.0747	0.121	0.3953	0.7557	1.1569	1.3852	1.5508	1.6658	1.7714	1.8677	1.9418	1.9442	1.9476	1.9694	1.9805	1.9937	2.006	2.0137	2.0175	2.0184
Odd_rep1_nuoG0.125_p1	0.0667	0.0623	0.068	0.0726	0.0759	0.083	0.1595	0.4165	0.6374	0.9782	1.1895	1.3412	1.5117	1.6454	1.7364	1.7992	1.8359	1.8639	1.8956	1.9233	1.9327	1.9543	1.9619	1.9607	1.9693
Odd_rep1_rbsB0.125_p1	0.0579	0.0541	0.0598	0.064	0.068	0.0724	0.0867	0.1581	0.4963	0.9367	1.2066	1.391	1.4997	1.6026	1.7103	1.7338	1.7707	1.7898	1.8181	1.8382	1.8531	1.8796	1.8835	1.8925	1.8957
Odd_rep1_ompF0.125_p1	0.0585	0.0546	0.0604	0.0652	0.0723	0.0896	0.2258	0.7324	0.9315	1.0808	1.3404	1.5428	1.7148	1.8333	1.9283	1.9821	2.0238	2.0512	2.0785	2.0964	2.0987	2.1069	2.1121	2.1099	2.1105
Odd_rep1_fadL0.125_p1	0.0607	0.057	0.0633	0.068	0.0748	0.0913	0.1609	0.3151	0.449	0.8413	1.1551	1.3476	1.4789	1.5965	1.6983	1.7888	1.8728	1.9436	1.9985	2.0164	2.0214	2.0305	2.0375	2.0387	2.0466
Odd_rep1_lon0.125_p1	0.0599	0.0559	0.0624	0.0661	0.0704	0.0745	0.0794	0.0873	0.0953	0.1121	0.1384	0.1715	0.2387	0.5014	0.8122	1.0463	1.2323	1.3569	1.4607	1.5415	1.5873	1.6391	1.6693	1.6902	1.7054
Odd_rep1_prc0.125_p1	0.0555	0.0512	0.0579	0.0609	0.0655	0.0759	0.1123	0.2741	0.4974	0.828	1.166	1.3353	1.4536	1.5591	1.6641	1.7382	1.7865	1.8066	1.8398	1.8608	1.8706	1.8927	1.9034	1.9033	1.9193
Odd_rep1_mrcA0.125_p1	0.0609	0.0572	0.0634	0.0673	0.0707	0.0745	0.089	0.2056	0.503	0.9014	1.2025	1.4083	1.5551	1.671	1.7923	1.887	1.9711	2.0413	2.1127	2.1738	2.2087	2.2358	2.2394	2.2307	2.222
Odd_rep1_yehK0.125_p1	0.0619	0.0581	0.0644	0.0688	0.0742	0.0812	0.1349	0.5441	0.8743	1.1495	1.4255	1.5706	1.7399	1.8553	1.9674	2.0522	2.1299	2.1858	2.2282	2.2624	2.2996	2.3273	2.3188	2.3278	2.3299
Odd_rep1_ybfQ0.125_p1	0.0725	0.0689	0.0753	0.0805	0.0846	0.0891	0.0915	0.0948	0.1157	0.1951	0.4245	0.5655	0.9623	1.4805	1.7232	1.8326	1.9225	2.0054	2.0664	2.1157	2.1549	2.1768	2.1715	2.1678	2.1668
Odd_rep1_truD0.125_p1	0.0722	0.0685	0.0743	0.0789	0.0899	0.1284	0.4241	0.9982	1.2105	1.407	1.5565	1.6459	1.7245	1.7706	1.8065	1.8238	1.8333	1.8389	1.8494	1.8619	1.8664	1.8834	1.8785	1.8921	1.8986
Odd_rep1_mprA0.125_p1	0.0607	0.0566	0.0628	0.0689	0.09	0.24	0.8669	1.1016	1.2871	1.3998	1.5132	1.68	1.6597	1.6821	1.7231	1.7531	1.7699	1.7935	1.8148	1.8262	1.8258	1.8392	1.8467	1.8484	1.8519
Odd_rep1_ubiF0.125_p1	0.0563	0.052	0.0582	0.0621	0.066	0.0714	0.1011	0.3769	0.7725	0.9124	1.0749	1.225	1.3213	1.4145	1.4979	1.5756	1.659	1.7354	1.7523	1.7783	1.7942	1.8183	1.8315	1.8494	1.8599
Odd_rep1_ybeX0.125_p1	0.0576	0.0547	0.0605	0.0648	0.0692	0.0761	0.1024	0.3057	0.717	1.075	1.3181	1.4885	1.5926	1.6657	1.7432	1.8178	1.8818	1.9431	1.9537	1.9718	1.9883	2.0077	2.0107	2.0185	2.0213
Odd_rep1_rep0.125_p1	0.0615	0.0581	0.0638	0.068	0.0715	0.0774	0.1001	0.2602	0.5221	0.7227	1.0521	1.2856	1.4181	1.5189	1.6147	1.7067	1.7886	1.826	1.8628	1.8855	1.8986	1.9299	1.9326	1.9405	1.9483
Odd_rep1_fadD0.125_p1	0.0698	0.0839	0.0823	0.072	0.0804	0.0988	0.2	0.8421	1.2659	1.5142	1.6354	1.7404	1.824	1.9023	1.9689	2.0085	2.0254	2.0378	2.0515	2.0619	2.0589	2.0669	2.0739	2.0722	2.0747
Odd_rep1_ydjO0.125_p1	0.0712	0.0674	0.0737	0.0777	0.0822	0.0973	0.1522	0.4114	0.6456	1.0084	1.4154	1.6142	1.7134	1.7898	1.8686	1.9302	1.943	1.9623	1.9833	1.9891	1.9864	1.9944	2.0051	2.0109	2.015
Odd_rep1_yedN0.125_p1	0.0684	0.0645	0.0707	0.0782	0.098	0.1724	0.4924	0.983	1.2487	1.4522	1.5673	1.6481	1.7289	1.768	1.8191	1.8488	1.8636	1.8767	1.8936	1.9065	1.9069	1.9241	1.9236	1.9381	1.9406
Odd_rep1_yhbJ0.125_p1	0.063	0.0592	0.0655	0.0735	0.0975	0.5166	1.1921	1.4527	1.6397	1.7562	1.8352	1.9015	1.9566	2.0219	2.0673	2.065	2.0648	2.072	2.0902	2.0939	2.0929	2.1026	2.1165	2.1118	2.1158
Odd_rep1_BW0.125_p1	0.0668	0.0624	0.0683	0.0724	0.0758	0.0785	0.0808	0.1029	0.4046	0.6042	0.7815	0.9603	1.1327	1.317	1.4567	1.5494	1.5932	1.6388	1.6899	1.7153	1.7489	1.7857	1.8151	1.8325	1.8438
Odd_rep1_MG0.125_p1	0.0579	0.0539	0.0597	0.0649	0.0744	0.1017	0.2127	0.3262	0.5327	0.6789	1.0399	1.3741	1.5595	1.7333	1.8991	2.0167	2.0989	2.1323	2.1582	2.1514	2.1666	2.1701	2.1925	2.1855	2.2011
Odd_rep1_Tric-resistant0.125_p1	0.066	0.0621	0.0683	0.072	0.0758	0.08	0.096	0.1452	0.3451	0.607	0.8299	0.9952	1.133	1.2302	1.3188	1.4654	1.5362	1.5912	1.6326	1.6251	1.6491	1.6778	1.6966	1.718	1.7389
Odd_rep1_soxR0.015_p1	0.0632	0.0597	0.0665	0.0809	0.2505	1.0256	1.3201	1.5197	1.6374	1.7747	1.8673	1.9432	1.9776	2.0136	2.0387	2.054	2.0632	2.0645	2.0711	2.0833	2.077	2.0848	2.0843	2.0906	2.0949
Odd_rep1_fadR0.015_p1	0.0618	0.0585	0.0659	0.0827	0.2516	1.1287	1.4315	1.5922	1.6771	1.7673	1.8468	1.9485	1.9606	1.9762	1.9937	2.005	2.0169	2.0298	2.0463	2.0542	2.0525	2.0702	2.068	2.0686	2.0778
Odd_rep1_frdD0.015_p1	0.0638	0.0596	0.0675	0.091	0.244	1.0092	1.2358	1.425	1.5351	1.6552	1.745	1.8012	1.8353	1.8637	1.8963	1.9154	1.9332	1.9477	1.968	1.9731	1.9764	1.9963	1.9982	2.0038	2.0043
Odd_rep1_nuoG0.015_p1	0.0572	0.0541	0.0622	0.0903	0.6446	1.1785	1.4422	1.5966	1.6702	1.7554	1.8268	1.8862	1.9389	1.9495	1.9693	1.9845	1.9975	2.0129	2.0269	2.0349	2.0268	2.0423	2.0461	2.0405	2.0376
Odd_rep1_rbsB0.015_p1	0.0575	0.0542	0.0636	0.0843	0.2131	0.9983	1.2449	1.4091	1.5303	1.6468	1.7466	1.8151	1.8423	1.8839	1.9201	1.9341	1.9555	1.957	1.9652	1.9743	1.9719	1.9792	1.9848	1.9879	1.991
Odd_rep1_ompF0.015_p1	0.0654	0.0624	0.0715	0.0831	0.1378	0.3247	0.4075	0.5611	1.0103	1.3581	1.6042	1.7637	1.8546	1.9133	1.9586	1.9877	1.9972	2.0052	2.0158	2.0286	2.0344	2.0476	2.0523	2.0567	2.0557
Odd_rep1_fadL0.015_p1	0.0616	0.0577	0.0663	0.0879	0.2251	1.0399	1.3258	1.5129	1.6348	1.7162	1.7983	1.8717	1.9213	1.9504	1.9624	1.9738	1.9815	1.9819	1.9923	2.0002	1.9944	2.0076	2.0146	2.0115	2.0112
Odd_rep1_lon0.015_p1	0.0668	0.0622	0.0699	0.0873	0.2523	1.0336	1.1748	1.3213	1.5145	1.6789	1.8059	1.8883	1.9395	2.0054	2.0343	2.0623	2.0649	2.0741	2.0878	2.0827	2.0769	2.0927	2.1012	2.1025	2.1125
Odd_rep1_prc0.015_p1	0.0574	0.0533	0.0612	0.0856	0.2657	1.0905	1.4414	1.5983	1.6941	1.7815	1.852	1.9029	1.9418	1.9697	1.9828	1.9892	1.9992	2.0034	2.0166	2.01	2.0157	2.0235	2.0306	2.0306	2.0317
Odd_rep1_mrcA0.015_p1	0.0546	0.0507	0.0582	0.0768	0.3463	0.9759	1.297	1.4899	1.6065	1.7731	1.8657	1.926	1.9698	2.0013	2.019	2.0479	2.05	2.051	2.0674	2.0716	2.0648	2.0795	2.0898	2.0866	2.0945
Odd_rep1_yehK0.015_p1	0.0607	0.0568	0.0638	0.0788	0.1838	0.8307	1.1603	1.426	1.5322	1.6217	1.7109	1.7754	1.8248	1.8568	1.8847	1.901	1.9294	1.9297	1.944	1.953	1.9516	1.9682	1.9752	1.9817	1.9932
Odd_rep1_ybfQ0.015_p1	0.0882	0.0832	0.0912	0.1069	0.1816	0.3745	0.5694	0.847	1.2824	1.5764	1.7353	1.8708	1.94	1.9737	1.989	2.007	1.9991	2.0011	2.0059	2.0138	2.01	2.0336	2.0401	2.0442	2.0504
Odd_rep1_truD0.015_p1	0.0665	0.0622	0.0701	0.0876	0.301	1.1351	1.3283	1.5424	1.6648	1.7868	1.888	1.966	2.0125	2.0463	2.0584	2.0617	2.0719	2.0809	2.0866	2.0925	2.0874	2.0974	2.1128	2.1033	2.1107
Odd_rep1_mprA0.015_p1	0.0672	0.0631	0.0709	0.0873	0.212	1.0443	1.1941	1.3444	1.47	1.6082	1.7133	1.7944	1.8408	1.8873	1.914	1.9383	1.9575	1.9674	1.9796	1.9862	1.9917	2.0043	2.0125	2.0125	2.0181
Odd_rep1_ubiF0.015_p1	0.0613	0.0571	0.0642	0.0746	0.1326	0.3101	0.5039	0.6724	0.8569	1.0706	1.2272	1.3669	1.4869	1.558	1.6128	1.6621	1.6969	1.7217	1.7539	1.7699	1.7804	1.8062	1.819	1.8298	1.8346
Odd_rep1_ybeX0.015_p1	0.0622	0.0583	0.0656	0.0731	0.1202	0.4665	1.0965	1.3772	1.5487	1.6513	1.7449	1.824	1.8972	1.9176	1.9406	1.9596	1.9696	1.9709	1.9786	1.9809	1.9824	1.9945	2.0023	2.0012	2.006
Odd_rep1_rep0.015_p1	0.0679	0.0646	0.0744	0.0927	0.2117	1.0671	1.3642	1.5511	1.6439	1.7289	1.8131	1.8813	1.8917	1.9226	1.944	1.9555	1.9686	1.9771	1.9843	1.9863	1.9829	1.9958	2.004	2.0011	2.0007
Odd_rep1_fadD0.015_p1	0.0735	0.0706	0.0811	0.0949	0.1729	0.8371	1.3234	1.5188	1.6348	1.7395	1.8353	1.9108	1.9334	1.9622	1.9841	2.0044	2.0135	2.0123	2.0272	2.0337	2.0264	2.0453	2.052	2.0491	2.0513
Odd_rep1_ydjO0.015_p1	0.061	0.0573	0.0643	0.0748	0.1673	0.8514	1.129	1.4257	1.5968	1.6708	1.7329	1.8167	1.8208	1.8537	1.8693	1.8906	1.9011	1.9017	1.9166	1.9209	1.922	1.9314	1.943	1.9448	1.9507
Odd_rep1_yedN0.015_p1	0.0696	0.0653	0.0724	0.0857	0.2023	1.0331	1.3834	1.5862	1.6953	1.7726	1.8502	1.9276	1.9723	1.9935	2.0096	2.0187	2.0374	2.0344	2.0518	2.0529	2.0494	2.0631	2.0682	2.0666	2.0659
Odd_rep1_yhbJ0.015_p1	0.0614	0.0538	0.0608	0.0739	0.1672	1.1057	1.447	1.5992	1.7071	1.7934	1.8924	1.956	2.0155	2.033	2.0483	2.0562	2.0685	2.074	2.0841	2.086	2.0936	2.1059	2.1156	2.1169	2.1158
Odd_rep1_BW0.015_p1	0.0596	0.0554	0.0627	0.0757	0.1694	0.7882	1.1204	1.3644	1.5236	1.6249	1.692	1.7241	1.7619	1.8033	1.8266	1.8593	1.8774	1.8819	1.8934	1.9051	1.9028	1.9121	1.916	1.9213	1.9211
Odd_rep1_MG0.015_p1	0.0572	0.0526	0.0594	0.0719	0.1353	0.3024	0.5152	0.7582	1.1793	1.4581	1.6492	1.7364	1.8024	1.8605	1.9023	1.9341	1.9475	1.9569	1.9695	1.9785	1.9833	2	2.0095	2.0127	2.0173
Odd_rep1_Tric-resistant0.015_p1	0.057	0.053	0.0599	0.0694	0.1315	0.6761	0.9125	1.0503	1.2232	1.3476	1.464	1.5439	1.6021	1.6424	1.6798	1.7179	1.742	1.7602	1.7777	1.7919	1.7985	1.8216	1.8337	1.834	1.8433
Odd_rep1_soxR_p1	0.0567	0.0526	0.0604	0.0776	0.269	1.0073	1.2796	1.4886	1.6251	1.7355	1.837	1.9069	1.9445	1.9715	1.9889	1.9977	2.0086	2.0201	2.0302	2.0352	2.0375	2.0489	2.0522	2.0518	2.0546
Odd_rep1_fadR_p1	0.0529	0.0488	0.0571	0.0727	0.2898	1.0669	1.3869	1.5622	1.647	1.732	1.8165	1.8781	1.9033	1.9264	1.9469	1.9612	1.9666	1.9838	2.0007	2.0033	2.0077	2.0182	2.0212	2.0225	2.0321
Odd_rep1_frdD_p1	0.058	0.0541	0.0622	0.0865	0.268	0.9994	1.1909	1.396	1.5153	1.6385	1.7368	1.7999	1.8438	1.8733	1.9019	1.9269	1.9475	1.9589	1.9791	1.9882	1.9945	2.007	2.0088	2.016	2.0165
Odd_rep1_nuoG_p1	0.0573	0.053	0.061	0.088	0.4877	1.1398	1.4282	1.5912	1.674	1.7425	1.8102	1.864	1.9194	1.9511	1.97	1.978	1.996	2.0007	2.0131	2.0169	2.0194	2.0333	2.0339	2.0316	2.0231
Odd_rep1_rbsB_p1	0.0549	0.0518	0.0589	0.0757	0.1902	0.9697	1.1838	1.3549	1.4802	1.6078	1.7094	1.7923	1.837	1.868	1.8959	1.9104	1.9335	1.9429	1.951	1.9631	1.9634	1.9773	1.9852	1.9811	1.9848
Odd_rep1_ompF_p1	0.0548	0.051	0.0579	0.07	0.1054	0.1839	0.3995	0.5099	0.9177	1.2733	1.5111	1.7135	1.8073	1.8636	1.9013	1.9285	1.9539	1.9684	1.9861	1.9994	2.0077	2.0281	2.0375	2.0337	2.0342
Odd_rep1_fadL_p1	0.0549	0.0512	0.0595	0.0788	0.2055	0.9687	1.3201	1.5103	1.6164	1.7044	1.785	1.8449	1.8794	1.9029	1.9209	1.9318	1.9352	1.9441	1.9529	1.9565	1.9574	1.9704	1.9754	1.9746	1.9806
Odd_rep1_lon_p1	0.0544	0.0501	0.0576	0.0747	0.204	0.8891	1.02	1.1621	1.4178	1.6038	1.7544	1.8573	1.9154	1.9543	1.9761	1.9938	2.0049	2.015	2.0287	2.0291	2.0336	2.0477	2.0585	2.0651	2.0662
Odd_rep1_prc_p1	0.056	0.0524	0.0601	0.0748	0.2288	1.0379	1.4136	1.585	1.6796	1.757	1.8244	1.8784	1.9188	1.9431	1.964	1.975	1.9848	1.9881	1.9955	2.0042	2.0017	2.0097	2.014	2.0133	2.0169
Odd_rep1_mrcA_p1	0.0526	0.0487	0.0563	0.0705	0.1989	1.0514	1.3339	1.5104	1.6083	1.7331	1.8288	1.9652	1.9715	2.0103	2.0377	2.0416	2.0469	2.0469	2.0626	2.0699	2.0688	2.0819	2.0934	2.0911	2.0911
Odd_rep1_yehK_p1	0.0588	0.0867	0.094	0.0736	0.1894	0.8122	1.1242	1.408	1.5106	1.5925	1.6785	1.744	1.7895	1.8197	1.846	1.8592	1.8791	1.8883	1.9082	1.9263	1.93	1.954	1.9712	1.9786	1.9896
Odd_rep1_ybfQ_p1	0.0589	0.0545	0.0622	0.0777	0.1435	0.2796	0.5597	0.7404	1.209	1.51	1.6881	1.8113	1.8849	1.9123	1.934	1.9512	1.9574	1.9637	1.9731	1.9834	1.9865	2.0006	2.0192	2.0176	2.0251
Odd_rep1_truD_p1	0.0583	0.0542	0.0625	0.0785	0.3156	1.0296	1.1942	1.4437	1.597	1.736	1.844	1.9208	1.9515	1.9861	2.0068	2.0225	2.0358	2.0397	2.0537	2.0618	2.0581	2.0728	2.0771	2.0835	2.084
Odd_rep1_mprA_p1	0.0595	0.0559	0.0631	0.0785	0.1985	0.9038	1.0953	1.2657	1.398	1.5411	1.6469	1.7178	1.7637	1.8012	1.8309	1.852	1.8737	1.8891	1.9042	1.9197	1.9277	1.939	1.9456	1.95	1.9554
Odd_rep1_ubiF_p1	0.0579	0.0542	0.0617	0.0724	0.1222	0.2853	0.473	0.6004	0.8703	1.168	1.3416	1.4414	1.5214	1.5732	1.6075	1.6493	1.6765	1.7019	1.7247	1.7419	1.7594	1.78	1.7924	1.8003	1.8089
Odd_rep1_ybeX_p1	0.0569	0.0528	0.0596	0.0676	0.1088	0.331	1.0529	1.3687	1.5634	1.684	1.7805	1.8472	1.9128	1.9348	1.9596	1.9703	1.9771	1.9747	1.9807	1.9893	1.9943	2.0163	2.0229	2.0221	2.0302
Odd_rep1_rep_p1	0.0581	0.0546	0.0617	0.0785	0.2113	1.0134	1.3835	1.5688	1.6682	1.7497	1.8301	1.8842	1.9147	1.9425	1.9602	1.9776	1.9868	1.9841	1.9955	2.0047	2.0027	2.0161	2.0226	2.024	2.025
Odd_rep1_fadD_p1	0.056	0.0528	0.059	0.0708	0.1251	0.7032	1.2176	1.4278	1.5575	1.6944	1.7922	1.8698	1.9158	1.9417	1.9633	1.9781	1.9871	1.9918	1.999	2.0095	2.0128	2.025	2.0275	2.0309	2.0317
Odd_rep1_ydjO_p1	0.0577	0.0537	0.0607	0.0738	0.1667	0.713	1.104	1.448	1.5832	1.6653	1.7394	1.7893	1.8176	1.8311	1.847	1.8621	1.8735	1.8857	1.8971	1.9035	1.9086	1.9203	1.9305	1.933	1.9359
Odd_rep1_yedN_p1	0.0554	0.0516	0.0587	0.0757	0.1477	0.964	1.2421	1.4716	1.5937	1.6813	1.7663	1.8422	1.8567	1.8832	1.9079	1.9204	1.9351	1.9419	1.9561	1.9659	1.968	1.9797	1.986	1.993	1.997
Odd_rep1_yhbJ_p1	0.0759	0.0711	0.0778	0.0897	0.1667	0.996	1.3247	1.4962	1.6245	1.7201	1.8171	1.8967	1.9416	1.9628	1.9757	1.9859	1.9914	1.9961	2.0028	2.0127	2.0058	2.0296	2.0418	2.0441	2.0516
Odd_rep1_BW_p1	0.0551	0.0515	0.0586	0.0676	0.1143	0.6761	1.0834	1.3228	1.4824	1.5855	1.6529	1.6994	1.7352	1.7636	1.7922	1.8086	1.8255	1.8359	1.8436	1.8562	1.854	1.8703	1.8801	1.8849	1.8872
Odd_rep1_MG_p1	0.0692	0.0655	0.0721	0.0818	0.128	0.2536	0.5242	0.6397	1.0138	1.2968	1.5075	1.6461	1.7684	1.8271	1.8742	1.9149	1.9381	1.95	1.9698	1.9866	1.998	2.019	2.0336	2.0399	2.0441
Odd_rep1_Tric-resistant_p1	0.0564	0.0518	0.0583	0.066	0.1134	0.511	0.9244	1.0849	1.2433	1.3913	1.5131	1.5987	1.659	1.7124	1.7547	1.7964	1.8332	1.8564	1.8755	1.8896	1.8965	1.9126	1.9188	1.9221	1.9234
Odd_rep1_yibA0.5_p2	0.1497	0.1379	0.1322	0.1283	0.1249	0.1241	0.1236	0.1242	0.1236	0.1233	0.1227	0.1222	0.1219	0.1214	0.1204	0.1203	0.1199	0.1194	0.119	0.1183	0.1169	0.1153	0.1153	0.1145	0.1127
Odd_rep1_yjcF0.5_p2	0.1493	0.1357	0.1308	0.1259	0.1247	0.1228	0.1232	0.1222	0.1224	0.1221	0.1212	0.1208	0.1201	0.1192	0.1191	0.1177	0.1174	0.117	0.1169	0.115	0.1151	0.1137	0.114	0.1127	0.1108
Odd_rep1_yjbI0.5_p2	0.164	0.1438	0.1377	0.1336	0.1307	0.1283	0.1263	0.1243	0.1226	0.1216	0.1201	0.1192	0.1183	0.1174	0.1166	0.1154	0.1158	0.115	0.1135	0.1132	0.1118	0.1119	0.1117	0.1105	0.1101
Odd_rep1_yjbL0.5_p2	0.125	0.11	0.1068	0.1046	0.1036	0.1017	0.1016	0.1004	0.1002	0.1005	0.0999	0.0989	0.0985	0.0983	0.0972	0.0971	0.0971	0.0972	0.0964	0.0965	0.0957	0.0953	0.0953	0.0955	0.0951
Odd_rep1_yigF0.5_p2	0.1281	0.1088	0.1072	0.1048	0.1051	0.1031	0.1028	0.1024	0.102	0.1017	0.1021	0.1011	0.101	0.1003	0.0997	0.0998	0.1001	0.0992	0.0995	0.1001	0.105	0.1037	0.0999	0.1044	0.1072
Odd_rep1_acrB0.5_p2	0.1737	0.1421	0.1373	0.1425	0.1348	0.1431	0.1547	0.1411	0.1494	0.1374	0.1431	0.135	0.134	0.1316	0.1341	0.1308	0.1352	0.132	0.1349	0.1331	0.1362	0.1308	0.134	0.1281	0.1278
Odd_rep1_aroE0.5_p2	0.1506	0.1285	0.1243	0.1231	0.1232	0.1218	0.1212	0.12	0.1203	0.1218	0.1208	0.1208	0.1195	0.12	0.1192	0.1181	0.1204	0.1196	0.1179	0.1183	0.1167	0.1162	0.1157	0.1147	0.1142
Odd_rep1_aroD0.5_p2	0.1216	0.1062	0.1038	0.1026	0.1013	0.0999	0.1001	0.0998	0.1005	0.1003	0.0998	0.0994	0.1001	0.0996	0.099	0.0989	0.0983	0.099	0.0983	0.0983	0.0972	0.0968	0.0971	0.0968	0.0964
Odd_rep1_aroC0.5_p2	0.1121	0.0982	0.139	0.1719	0.167	0.1459	0.1514	0.1648	0.1176	0.0927	0.1078	0.0918	0.1048	0.0923	0.0932	0.0909	0.0908	0.1137	0.1119	0.0904	0.0905	0.1064	0.0899	0.0898	0.0946
Odd_rep1_fre0.5_p2	0.1092	0.0958	0.0932	0.0912	0.0907	0.0897	0.0897	0.0889	0.0889	0.0892	0.0889	0.0886	0.0886	0.1126	0.0877	0.0879	0.0881	0.0878	0.0868	0.0872	0.0866	0.086	0.086	0.0858	0.0851
Odd_rep1_sspA0.5_p2	0.1048	0.0928	0.0905	0.0891	0.0884	0.0872	0.0872	0.0862	0.0864	0.0865	0.086	0.0856	0.0857	0.0853	0.0849	0.085	0.0847	0.0847	0.0843	0.0845	0.0837	0.0841	0.0839	0.0841	0.0836
Odd_rep1_minC0.5_p2	0.1046	0.0924	0.0952	0.0959	0.0883	0.0877	0.0867	0.0877	0.0853	0.0857	0.085	0.085	0.0846	0.0912	0.1026	0.0959	0.0842	0.0942	0.0861	0.0834	0.0828	0.0825	0.0831	0.0829	0.0827
Odd_rep1_gcvP0.5_p2	0.1133	0.101	0.098	0.0963	0.0952	0.094	0.0939	0.0936	0.0958	0.0947	0.0959	0.0983	0.0951	0.0949	0.0947	0.095	0.0959	0.0968	0.0961	0.0934	0.0921	0.0892	0.0907	0.0891	0.0888
Odd_rep1_treC0.5_p2	0.1148	0.1017	0.0997	0.0978	0.0972	0.0962	0.0963	0.0955	0.0954	0.0961	0.0956	0.0956	0.0948	0.0945	0.0938	0.0936	0.0931	0.0929	0.0923	0.0921	0.0909	0.0904	0.0909	0.0906	0.091
Odd_rep1_galU0.5_p2	0.1423	0.1253	0.121	0.1167	0.1197	0.1195	0.1207	0.1212	0.1215	0.1312	0.1333	0.134	0.1391	0.1416	0.1414	0.1435	0.1408	0.136	0.1435	0.1404	0.1217	0.1117	0.1092	0.1073	0.1056
Odd_rep1_carB0.5_p2	0.1071	0.0953	0.0933	0.0912	0.0904	0.0892	0.089	0.0892	0.0889	0.0895	0.0897	0.0898	0.0894	0.0889	0.0886	0.0883	0.0883	0.0878	0.0873	0.087	0.0861	0.0857	0.0859	0.0857	0.0857
Odd_rep1_purL0.5_p2	0.1186	0.1049	0.1018	0.0989	0.0978	0.0969	0.0972	0.0959	0.0962	0.0972	0.0958	0.0954	0.0959	0.0951	0.0944	0.0944	0.0943	0.0942	0.0929	0.093	0.0919	0.0915	0.0917	0.0916	0.0915
Odd_rep1_creA0.5_p2	0.0989	0.0882	0.0861	0.0844	0.0838	0.0833	0.0832	0.0829	0.0826	0.0832	0.0832	0.0832	0.083	0.0827	0.082	0.0819	0.0816	0.0811	0.0806	0.0807	0.08	0.0797	0.0798	0.0795	0.0796
Odd_rep1_cyaA0.5_p2	0.1013	0.0893	0.0872	0.0855	0.0851	0.0843	0.084	0.0834	0.0833	0.0837	0.0836	0.0831	0.083	0.0827	0.0823	0.0818	0.0822	0.0819	0.0815	0.0814	0.0804	0.0803	0.0808	0.0804	0.0801
Odd_rep1_sapD0.5_p2	0.1015	0.0908	0.0885	0.0868	0.0862	0.0855	0.0855	0.0845	0.0846	0.085	0.0849	0.0849	0.0844	0.0843	0.0835	0.0837	0.0834	0.083	0.0826	0.0826	0.082	0.0818	0.0817	0.0818	0.082
Odd_rep1_psta0.5_p2	0.1016	0.0899	0.0877	0.0864	0.0853	0.0842	0.0844	0.0837	0.0831	0.0838	0.0836	0.0836	0.0831	0.083	0.0825	0.0825	0.0822	0.0822	0.0818	0.0817	0.0813	0.0811	0.081	0.0808	0.0811
Odd_rep1_BW0.5_p2	0.1076	0.0949	0.0915	0.0899	0.0892	0.0879	0.0874	0.0868	0.0862	0.0869	0.0865	0.0857	0.0852	0.0849	0.0849	0.0841	0.0846	0.0844	0.0839	0.0836	0.0827	0.0823	0.0832	0.0832	0.0832
Odd_rep1_MG0.5_p2	0.1124	0.0989	0.0947	0.0932	0.0919	0.0908	0.0903	0.0896	0.0894	0.0899	0.089	0.0889	0.088	0.0881	0.0873	0.0876	0.0874	0.087	0.0867	0.0865	0.0859	0.0855	0.0854	0.0856	0.0855
Odd_rep1_Triclosan_resistant_BW0.5_p2	0.1032	0.0907	0.0882	0.0869	0.0857	0.0848	0.085	0.0845	0.0837	0.084	0.0856	0.0965	0.1272	0.1779	0.2547	0.3268	0.4176	0.541	0.7319	0.9134	1.0734	1.2206	1.381	1.5177	1.577
Odd_rep1_yibA0.125_p2	0.1046	0.0924	0.0895	0.0884	0.0873	0.0858	0.0859	0.0854	0.0848	0.0853	0.085	0.0847	0.0844	0.0844	0.0836	0.0838	0.0833	0.0834	0.083	0.0832	0.0823	0.0822	0.0824	0.0822	0.0823
Odd_rep1_yjcF0.125_p2	0.1131	0.0987	0.096	0.0943	0.0933	0.0923	0.0927	0.0926	0.0925	0.0944	0.0982	0.1139	0.185	0.3275	0.5189	0.7418	0.9407	1.0212	1.1401	1.3876	1.5112	1.6197	1.7046	1.7684	1.8231
Odd_rep1_yjbI0.125_p2	0.1076	0.0962	0.0948	0.0937	0.0918	0.0909	0.0911	0.0916	0.094	0.1075	0.1751	0.2922	0.5008	0.7013	0.9434	1.1407	1.3019	1.4502	1.5662	1.6544	1.7248	1.7856	1.8485	1.9011	1.9607
Odd_rep1_yjbL0.125_p2	0.1097	0.0978	0.096	0.0945	0.0938	0.0924	0.0931	0.0935	0.0946	0.1022	0.1271	0.1964	0.3176	0.4755	0.66	0.9791	1.269	1.4596	1.5943	1.6904	1.7629	1.8131	1.8712	1.8998	1.9372
Odd_rep1_yigF0.125_p2	0.1053	0.0944	0.093	0.0914	0.0901	0.0893	0.0899	0.09	0.0898	0.0919	0.1031	0.1417	0.2464	0.3755	0.5425	0.7752	1.0443	1.2685	1.4347	1.5606	1.6635	1.7404	1.8067	1.8575	1.9204
Odd_rep1_acrB0.125_p2	0.1027	0.0924	0.0905	0.0891	0.0876	0.087	0.0873	0.0874	0.0869	0.0877	0.0874	0.0876	0.0877	0.0882	0.0876	0.0879	0.0876	0.0869	0.0868	0.0861	0.085	0.0847	0.085	0.0843	0.084
Odd_rep1_aroE0.125_p2	0.1044	0.0926	0.0906	0.0893	0.0878	0.0874	0.0875	0.0876	0.0877	0.0884	0.088	0.0879	0.0875	0.088	0.0872	0.092	0.1373	0.2398	0.3881	0.6325	0.8544	1.0166	1.1445	1.2727	1.4718
Odd_rep1_aroD0.125_p2	0.1064	0.0944	0.0925	0.0911	0.0901	0.0898	0.0899	0.0893	0.0898	0.0904	0.0906	0.0902	0.0903	0.0906	0.0903	0.0901	0.0899	0.09	0.0887	0.088	0.0873	0.087	0.0873	0.0866	0.0861
Odd_rep1_aroC0.125_p2	0.1024	0.0908	0.0891	0.0878	0.0875	0.0869	0.0876	0.0868	0.0869	0.0891	0.0968	0.1592	0.3036	0.504	0.8063	1.0186	1.1932	1.3143	1.4115	1.4948	1.5795	1.6456	1.7015	1.7434	1.7814
Odd_rep1_fre0.125_p2	0.1027	0.0908	0.0886	0.0869	0.0861	0.086	0.0857	0.0855	0.0847	0.0857	0.0848	0.0853	0.0845	0.0842	0.0836	0.0834	0.0831	0.0833	0.0823	0.0827	0.0814	0.082	0.0815	0.0816	0.0814
Odd_rep1_sspA0.125_p2	0.0988	0.0879	0.086	0.0847	0.0838	0.0835	0.0832	0.0826	0.0827	0.0825	0.083	0.0839	0.1746	0.5587	0.7338	1.0474	1.1905	1.3241	1.4435	1.5407	1.6056	1.6578	1.6917	1.7285	1.7661
Odd_rep1_minC0.125_p2	0.1017	0.0901	0.0878	0.0867	0.0863	0.0848	0.0843	0.0833	0.0834	0.0833	0.0833	0.0831	0.0835	0.086	0.0941	0.169	0.3652	0.5534	0.7289	0.9323	1.1796	1.4046	1.5062	1.595	1.6659
Odd_rep1_gcvP0.125_p2	0.105	0.0933	0.0913	0.0899	0.0889	0.0881	0.0878	0.0865	0.0865	0.0862	0.0862	0.0859	0.0856	0.085	0.0847	0.0844	0.0846	0.0857	0.0987	0.1646	0.3021	0.505	0.7314	1.0773	1.3385
Odd_rep1_treC0.125_p2	0.1048	0.0951	0.0936	0.0923	0.0919	0.0909	0.0916	0.0908	0.1064	0.1943	0.3449	0.5476	0.7016	0.8676	1.0735	1.3141	1.4578	1.5535	1.6524	1.7359	1.806	1.8746	1.931	1.9673	2.0131
Odd_rep1_galU0.125_p2	0.104	0.0933	0.0911	0.0894	0.089	0.0882	0.0881	0.0876	0.0876	0.0885	0.0889	0.0887	0.0887	0.0886	0.089	0.0889	0.0883	0.0887	0.0881	0.0883	0.0872	0.0865	0.087	0.086	0.0859
Odd_rep1_carB0.125_p2	0.1052	0.0949	0.0928	0.0909	0.0902	0.0894	0.0898	0.0898	0.0902	0.092	0.0967	0.1181	0.2004	0.3101	0.5089	0.7541	0.9314	1.2097	1.334	1.4766	1.5793	1.6667	1.7352	1.7768	1.8264
Odd_rep1_purL0.125_p2	0.1017	0.0918	0.0899	0.0881	0.0878	0.0877	0.0885	0.089	0.0924	0.1032	0.1459	0.2308	0.3655	0.5561	0.7939	1.1038	1.2996	1.4309	1.5468	1.6261	1.6884	1.7476	1.7929	1.8373	1.8793
Odd_rep1_creA0.125_p2	0.1004	0.0905	0.0889	0.0872	0.0868	0.0859	0.0861	0.0857	0.0863	0.0872	0.0871	0.0873	0.0871	0.09	0.1265	0.2491	0.4239	0.6261	0.8322	1.035	1.2557	1.397	1.4879	1.6139	1.7187
Odd_rep1_cyaA0.125_p2	0.1077	0.0968	0.0948	0.0931	0.0926	0.0918	0.0917	0.0907	0.0914	0.0924	0.092	0.0921	0.0923	0.0915	0.0915	0.0911	0.0907	0.0908	0.0902	0.0902	0.0893	0.0886	0.0883	0.0878	0.0881
Odd_rep1_sapD0.125_p2	0.0995	0.0927	0.0919	0.0895	0.0891	0.0898	0.1018	0.1411	0.2007	0.2805	0.3476	0.4286	0.7147	1.0218	1.2385	1.3727	1.4565	1.5362	1.604	1.6627	1.7025	1.746	1.787	1.8078	1.8363
Odd_rep1_psta0.125_p2	0.1011	0.0898	0.0878	0.0863	0.0858	0.0853	0.0852	0.0845	0.0842	0.0849	0.0841	0.0844	0.0841	0.0838	0.0835	0.0834	0.0831	0.083	0.0822	0.0821	0.0814	0.0812	0.0811	0.0809	0.0809
Odd_rep1_BW0.125_p2	0.1008	0.0889	0.0872	0.0859	0.0868	0.0917	0.1086	0.116	0.1176	0.1119	0.11	0.1039	0.089	0.087	0.0979	0.0971	0.0981	0.0986	0.0987	0.0995	0.0992	0.1005	0.1007	0.1021	0.1044
Odd_rep1_MG0.125_p2	0.1008	0.0889	0.0871	0.0854	0.0851	0.0843	0.084	0.0833	0.0829	0.0832	0.0827	0.0827	0.0827	0.0829	0.0867	0.1185	0.2023	0.5087	0.4749	0.5281	0.8001	1.1139	1.4046	1.5852	1.7224
Odd_rep1_Triclosan_resistant_BW0.125_p2	0.0999	0.0881	0.0859	0.0851	0.0931	0.1855	0.8271	1.1749	1.3567	1.5338	1.658	1.7093	1.7467	1.7831	1.8097	1.837	1.855	1.8713	1.896	1.9099	1.9215	1.9429	1.9631	1.96	1.9794
Odd_rep1_yibA0.015_p2	0.109	0.0977	0.0994	0.1301	0.554	1.2248	1.4191	1.5258	1.6518	1.7634	1.8573	1.8802	1.8987	1.9315	1.9533	1.9641	1.9847	1.9992	2.0063	2.0173	2.0305	2.038	2.0564	2.0455	2.0569
Odd_rep1_yjcF0.015_p2	0.1077	0.0967	0.0991	0.1375	0.798	1.2028	1.4058	1.5467	1.683	1.804	1.8849	1.9202	1.9361	1.9687	1.9855	1.9964	2.012	2.0206	2.0302	2.0335	2.0525	2.0549	2.0725	2.0683	2.0848
Odd_rep1_yjbI0.015_p2	0.1066	0.0968	0.0988	0.151	0.7727	1.1632	1.4592	1.612	1.7199	1.8232	1.9036	1.9618	1.9886	2.0143	2.0387	2.0516	2.0608	2.0695	2.0779	2.0924	2.0905	2.1079	2.1243	2.117	2.1276
Odd_rep1_yjbL0.015_p2	0.1094	0.0995	0.1075	0.1847	1.0144	1.3989	1.5945	1.7022	1.7871	1.856	1.9243	1.9861	2.0127	2.0387	2.0569	2.0536	2.0713	2.0857	2.0848	2.0859	2.1064	2.1144	2.1264	2.1134	2.1299
Odd_rep1_yigF0.015_p2	0.1025	0.0925	0.0996	0.2149	0.9512	1.2416	1.49	1.6235	1.7419	1.8453	1.9256	1.9475	1.9727	2.0032	2.0288	2.0367	2.0468	2.0523	2.0686	2.079	2.0874	2.0908	2.1107	2.1027	2.1157
Odd_rep1_acrB0.015_p2	0.1055	0.0962	0.0944	0.0935	0.0933	0.0923	0.0936	0.0929	0.0925	0.0932	0.0924	0.0921	0.0917	0.0914	0.0909	0.0904	0.0899	0.0901	0.0893	0.089	0.0876	0.0876	0.0874	0.0872	0.0867
Odd_rep1_aroE0.015_p2	0.1024	0.0924	0.0987	0.1718	1.0711	1.4159	1.5803	1.6727	1.7387	1.7968	1.8453	1.8956	1.9407	1.9915	2.0359	2.0423	2.063	2.0753	2.0778	2.0893	2.093	2.097	2.1118	2.1037	2.1171
Odd_rep1_aroD0.015_p2	0.1032	0.0924	0.0936	0.1139	0.6294	1.1908	1.4082	1.5351	1.6088	1.6616	1.7167	1.7665	1.8105	1.8587	1.9078	1.9411	1.9592	1.9743	1.9895	1.9978	2.015	2.0181	2.0356	2.024	2.0404
Odd_rep1_aroC0.015_p2	0.1011	0.0914	0.094	0.1381	0.885	1.3215	1.5045	1.6057	1.6792	1.7373	1.7994	1.8454	1.8975	1.9385	1.9784	1.9909	2.0304	2.0411	2.0606	2.0725	2.0847	2.0892	2.1062	2.094	2.1153
Odd_rep1_fre0.015_p2	0.0998	0.089	0.0909	0.1335	0.6117	1.139	1.1698	1.3466	1.5108	1.6271	1.7066	1.7586	1.8075	1.8524	1.8878	1.9194	1.9501	1.9658	1.9961	2.0192	2.0267	2.0336	2.0559	2.051	2.0623
Odd_rep1_sspA0.015_p2	0.0994	0.0887	0.0886	0.1065	0.2061	0.862	1.1681	1.3462	1.4782	1.5539	1.6504	1.7397	1.8018	1.8505	1.8849	1.9016	1.9098	1.9332	1.9446	1.9501	1.9525	1.9689	1.978	1.9787	1.9889
Odd_rep1_minC0.015_p2	0.1004	0.0899	0.092	0.1157	0.2191	0.4986	0.926	1.2735	1.4233	1.5358	1.6662	1.7661	1.8319	1.8763	1.902	1.9205	1.9491	1.9539	1.9727	1.987	1.9962	2.0033	2.0211	2.016	2.0212
Odd_rep1_gcvP0.015_p2	0.1085	0.098	0.1064	0.1892	1.005	1.3551	1.546	1.6517	1.7352	1.8142	1.8858	1.9365	1.9535	1.9821	1.9975	1.996	2.0062	2.0077	2.0203	2.0245	2.0335	2.0365	2.0528	2.0509	2.0597
Odd_rep1_treC0.015_p2	0.1062	0.0961	0.1053	0.1976	0.747	1.204	1.4185	1.5428	1.6468	1.7323	1.8125	1.8714	1.9225	1.9764	2.0089	2.0151	2.0363	2.0391	2.044	2.0525	2.0683	2.0627	2.0845	2.0787	2.0894
Odd_rep1_galU0.015_p2	0.1031	0.0934	0.0952	0.1298	0.4111	1.1988	1.4501	1.6009	1.6924	1.7686	1.8367	1.8938	1.9498	1.9902	2.0073	2.0147	2.0261	2.0419	2.0444	2.0549	2.0632	2.0681	2.0858	2.0737	2.0834
Odd_rep1_carB0.015_p2	0.1055	0.0969	0.1013	0.1533	0.5609	1.0987	1.1521	1.4011	1.5863	1.7299	1.8381	1.9239	1.9646	1.9964	2.0247	2.0371	2.0509	2.0613	2.0738	2.078	2.0868	2.1003	2.1125	2.1035	2.1123
Odd_rep1_purL0.015_p2	0.1025	0.0939	0.102	0.1743	0.9413	1.3278	1.5655	1.6776	1.7685	1.8514	1.9276	1.9738	1.9984	2.0214	2.0402	2.0444	2.0561	2.0641	2.0632	2.0816	2.0865	2.0907	2.1122	2.1059	2.1089
Odd_rep1_creA0.015_p2	0.1018	0.0927	0.1012	0.1827	0.9758	1.3771	1.5702	1.6806	1.7649	1.8369	1.9125	1.9647	1.996	2.0206	2.039	2.0462	2.0576	2.0633	2.0706	2.0731	2.0871	2.092	2.1026	2.099	2.1061
Odd_rep1_cyaA0.015_p2	0.1008	0.0945	0.0984	0.1434	0.8349	1.3253	1.5605	1.6987	1.7992	1.8768	1.9439	1.9833	2.0128	2.0442	2.0656	2.0731	2.076	2.0867	2.0912	2.0925	2.0921	2.0933	2.1029	2.0904	2.1025
Odd_rep1_sapD0.015_p2	0.102	0.0929	0.0961	0.1266	0.3028	0.9424	1.2241	1.4522	1.5775	1.6741	1.7652	1.8405	1.9099	1.9441	1.969	1.9848	1.9939	2.006	2.0133	2.0244	2.0357	2.0444	2.0586	2.0515	2.0645
Odd_rep1_psta0.015_p2	0.0976	0.0877	0.0887	0.1047	0.1977	0.8859	1.201	1.4155	1.5321	1.6505	1.7418	1.8089	1.8402	1.8744	1.9063	1.9209	1.9381	1.9599	1.9763	1.9871	2.0003	2.0111	2.0251	2.0205	2.0335
Odd_rep1_BW0.015_p2	0.0959	0.0855	0.0859	0.1144	0.5018	1.0668	1.2789	1.4537	1.5442	1.6212	1.6771	1.7316	1.7761	1.8352	1.8804	1.9062	1.9325	1.9618	1.9821	1.999	2.025	2.0348	2.0532	2.0528	2.0648
Odd_rep1_MG0.015_p2	0.1006	0.0898	0.0885	0.0982	0.177	0.3449	0.5448	0.8143	1.2285	1.4913	1.6582	1.7989	1.8727	1.9262	1.9681	1.9949	2.0171	2.0337	2.0431	2.0488	2.0571	2.0645	2.086	2.0782	2.0927
Odd_rep1_Triclosan_resistant_BW0.015_p2	0.1004	0.0883	0.0886	0.1002	0.2495	1.0303	1.3214	1.5104	1.6333	1.6923	1.7443	1.7714	1.8109	1.8486	1.8792	1.8954	1.9189	1.9389	1.9456	1.9694	1.9906	1.9958	2.0207	2.0123	2.0283
Odd_rep1_yibA_p2	0.1147	0.0996	0.1015	0.1365	0.8394	1.2152	1.407	1.5246	1.649	1.7656	1.8544	1.8841	1.9197	1.9486	1.975	2.0038	2.0174	2.0315	2.0429	2.05	2.062	2.0678	2.0785	2.0663	2.0822
Odd_rep1_yjcF_p2	0.1066	0.0962	0.0999	0.1505	0.9208	1.2155	1.4053	1.5579	1.6956	1.8077	1.9003	1.9239	1.9645	1.9914	2.0203	2.0264	2.0442	2.0496	2.0518	2.0663	2.0768	2.0759	2.0911	2.0836	2.0917
Odd_rep1_yjbI_p2	0.1039	0.0946	0.1012	0.1698	0.7527	1.1015	1.5044	1.6466	1.7402	1.8246	1.9037	1.9553	1.9843	2.0142	2.0346	2.0414	2.0602	2.0639	2.0708	2.0871	2.0932	2.1029	2.1187	2.1129	2.1227
Odd_rep1_yjbL_p2	0.1022	0.0933	0.1029	0.2025	1.1029	1.4319	1.612	1.7047	1.7781	1.8422	1.9183	1.9704	2.0055	2.0368	2.0483	2.0576	2.0675	2.0776	2.0876	2.0946	2.1014	2.1097	2.1211	2.1159	2.1253
Odd_rep1_yigF_p2	0.0973	0.0887	0.0987	0.2099	0.9907	1.2438	1.4929	1.626	1.7425	1.8419	1.9162	1.9436	1.9724	2.0013	2.0225	2.0327	2.0522	2.0587	2.074	2.0852	2.0867	2.0986	2.1118	2.1138	2.1125
Odd_rep1_acrB_p2	0.1001	0.0908	0.0981	0.1801	1.0187	1.4217	1.5522	1.6314	1.7255	1.8085	1.889	1.9358	1.9556	1.9774	1.9942	2.0105	2.0231	2.0373	2.0531	2.0569	2.0756	2.0759	2.0926	2.0792	2.0903
Odd_rep1_aroE_p2	0.0975	0.0881	0.0942	0.1616	1.0774	1.3794	1.5493	1.6393	1.7037	1.7538	1.8119	1.8569	1.9023	1.9412	1.9898	2.0023	2.0158	2.0307	2.0379	2.0458	2.0553	2.06	2.0694	2.0656	2.074
Odd_rep1_aroD_p2	0.0985	0.0889	0.0914	0.1179	0.6179	1.1631	1.3882	1.513	1.5877	1.6371	1.6915	1.7346	1.7729	1.8144	1.8605	1.8885	1.914	1.9269	1.9381	1.9518	1.9622	1.9741	1.9923	1.9846	1.9964
Odd_rep1_aroC_p2	0.0974	0.0878	0.0918	0.1312	0.8744	1.2582	1.4548	1.5624	1.6416	1.7021	1.7686	1.8229	1.8762	1.9229	1.962	1.9765	2.0092	2.0211	2.0337	2.0525	2.0661	2.0749	2.0927	2.0845	2.0965
Odd_rep1_fre_p2	0.0985	0.0885	0.0915	0.1264	0.549	1.0554	1.0989	1.3141	1.4455	1.5689	1.656	1.7237	1.7794	1.8275	1.8739	1.9111	1.9435	1.9618	1.9831	1.9945	2.0088	2.0234	2.0396	2.0308	2.0504
Odd_rep1_sspA_p2	0.0988	0.0886	0.0896	0.1086	0.2057	0.8451	1.1612	1.3549	1.4514	1.5523	1.6464	1.7384	1.8023	1.8424	1.8725	1.8915	1.9161	1.929	1.939	1.9528	1.9531	1.9669	1.9807	1.9788	1.9922
Odd_rep1_minC_p2	0.0991	0.0883	0.0929	0.1226	0.238	0.5833	1.0221	1.315	1.467	1.5915	1.7252	1.8181	1.8753	1.8977	1.9252	1.9448	1.9584	1.973	1.98	1.9986	2.0094	2.016	2.0301	2.0252	2.0372
Odd_rep1_gcvP_p2	0.1036	0.0964	0.1076	0.1932	1.0083	1.3545	1.5267	1.6205	1.7125	1.7919	1.8657	1.9112	1.9343	1.9624	1.9757	1.9892	1.994	2.0034	2.0079	2.0213	2.0274	2.0363	2.0599	2.0434	2.0619
Odd_rep1_treC_p2	0.1037	0.0953	0.1061	0.2008	0.7984	1.2216	1.4317	1.5626	1.6748	1.7642	1.8438	1.909	1.9607	2.0067	2.0279	2.0357	2.0497	2.0538	2.0555	2.0773	2.0803	2.0885	2.0988	2.0873	2.1019
Odd_rep1_galU_p2	0.1116	0.102	0.1063	0.1488	0.3764	1.1042	1.3638	1.5323	1.6342	1.7122	1.7798	1.8362	1.8828	1.9297	1.9466	1.9614	1.9772	1.9875	1.9956	2.0095	2.0285	2.0286	2.0425	2.0425	2.0506
Odd_rep1_carB_p2	0.1011	0.0924	0.0979	0.1389	0.4327	1.0072	1.0344	1.2838	1.4851	1.6356	1.7416	1.828	1.8617	1.9005	1.924	1.9429	1.962	1.9673	1.9819	1.9998	2.01	2.0253	2.0371	2.0348	2.0519
Odd_rep1_purL_p2	0.102	0.093	0.0986	0.1542	0.9742	1.338	1.5593	1.6546	1.7505	1.83	1.8976	1.9511	1.9728	1.9976	2.0067	2.0131	2.0213	2.03	2.0348	2.0505	2.0593	2.0788	2.0915	2.0871	2.1009
Odd_rep1_creA_p2	0.1009	0.093	0.0988	0.1653	0.994	1.398	1.5774	1.6688	1.7417	1.8118	1.8782	1.9401	1.9607	1.9922	2.0086	2.015	2.0239	2.0363	2.0372	2.0526	2.0596	2.0675	2.0847	2.0725	2.0895
Odd_rep1_cyaA_p2	0.114	0.102	0.1049	0.1408	0.8517	1.3317	1.5576	1.7042	1.8106	1.8892	1.9531	1.9942	2.0263	2.055	2.0747	2.0836	2.0995	2.1088	2.1084	2.1247	2.1368	2.1381	2.1467	2.1302	2.1415
Odd_rep1_sapD_p2	0.1004	0.0903	0.0925	0.1119	0.2219	0.9007	1.1866	1.4305	1.5632	1.6635	1.7581	1.8274	1.8982	1.9241	1.9377	1.9388	1.9555	1.9545	1.9737	1.9914	2.0067	2.0209	2.0358	2.0419	2.0595
Odd_rep1_psta_p2	0.0997	0.0904	0.0922	0.1119	0.2137	0.8892	1.1913	1.3721	1.5091	1.6257	1.7146	1.7538	1.7817	1.8213	1.8482	1.8694	1.8914	1.9091	1.9276	1.9532	1.9668	1.9846	2.0069	2.0033	2.0188
Odd_rep1_BW_p2	0.0969	0.0866	0.0879	0.1052	0.3917	1.0699	1.3088	1.4783	1.5781	1.6511	1.709	1.7664	1.8076	1.8545	1.8783	1.8941	1.9224	1.9365	1.9537	1.9796	1.9946	2.0035	2.0253	2.0167	2.0274
Odd_rep1_MG_p2	0.0979	0.0881	0.0875	0.0998	0.1652	0.3327	0.6036	0.8342	1.1804	1.4313	1.5871	1.7258	1.8216	1.8782	1.9177	1.9349	1.9606	1.9807	1.9856	2.0069	2.0181	2.0282	2.0456	2.0407	2.0624
Odd_rep1_Triclosan_resistant_BW_p2	0.0997	0.0888	0.0882	0.0979	0.2379	1.0683	1.3461	1.5242	1.6512	1.7124	1.7629	1.8106	1.8501	1.8819	1.9105	1.9306	1.9484	1.966	1.9821	2.0103	2.0201	2.032	2.0469	2.0403	2.0543
Odd_rep1_ptsN0.5_p3	0.1083	0.1073	0.1034	0.1028	0.1042	0.1097	0.1195	0.1408	0.1741	0.2146	0.2434	0.2611	0.2714	0.3089	0.3049	0.3064	0.3009	0.2968	0.2887	0.2814	0.2756	0.2708	0.2676	0.2643	0.2603
Odd_rep1_trkA0.5_p3	0.1058	0.0957	0.0936	0.0916	0.0918	0.0979	0.1059	0.1355	0.1772	0.2311	0.2475	0.2442	0.2592	0.2875	0.287	0.2864	0.2849	0.2801	0.2747	0.2674	0.2632	0.2583	0.254	0.2512	0.2494
Odd_rep1_rsmB0.5_p3	0.1116	0.099	0.0947	0.0945	0.0947	0.1025	0.1131	0.1481	0.1756	0.215	0.251	0.2667	0.2857	0.3025	0.3011	0.2951	0.2909	0.2818	0.2756	0.2685	0.2631	0.2585	0.2535	0.25	0.2491
Odd_rep1_tatC0.5_p3	0.1084	0.0886	0.2056	0.0857	0.0862	0.0894	0.1052	0.1406	0.1789	0.2148	0.2357	0.2561	0.2766	0.3052	0.3105	0.318	0.3155	0.3088	0.3	0.2908	0.2833	0.2754	0.268	0.2636	0.256
Odd_rep1_NusBinsteadofA0.5_p3	0.1255	0.0936	0.0906	0.0902	0.0917	0.095	0.1061	0.1309	0.1602	0.21	0.2573	0.2788	0.2909	0.304	0.306	0.3039	0.3007	0.2946	0.285	0.2784	0.2719	0.2662	0.2625	0.2589	0.2555
Odd_rep1_greA0.5_p3	0.1338	0.095	0.0926	0.0923	0.0936	0.0986	0.1136	0.1382	0.1644	0.2033	0.2453	0.2746	0.3017	0.3298	0.3331	0.3396	0.3363	0.3303	0.32	0.3118	0.3041	0.2938	0.2899	0.2834	0.2771
Odd_rep1_metL0.5_p3	0.1142	0.0994	0.0959	0.0956	0.0974	0.1003	0.1138	0.1336	0.1623	0.1985	0.2375	0.2646	0.2929	0.3139	0.3189	0.3171	0.3143	0.3068	0.2969	0.2899	0.2802	0.274	0.2679	0.2643	0.2606
Odd_rep1_yhiL0.5_p3	0.1073	0.0941	0.0913	0.0932	0.0916	0.0973	0.1093	0.137	0.1576	0.2051	0.2348	0.2519	0.2703	0.3025	0.3058	0.313	0.3108	0.3081	0.2995	0.2928	0.2855	0.2766	0.2723	0.2668	0.2611
Odd_rep1_wzzE0.5_p3	0.108	0.0943	0.092	0.091	0.0921	0.098	0.1105	0.1434	0.1712	0.2139	0.2397	0.2767	0.2989	0.2998	0.3048	0.3021	0.3007	0.302	0.2994	0.2916	0.2832	0.2819	0.2713	0.2669	0.264
Odd_rep1_fimI0.5_p3	0.1256	0.1052	0.1013	0.1009	0.103	0.1097	0.1261	0.1526	0.1802	0.2041	0.2356	0.2604	0.276	0.301	0.3196	0.3319	0.3371	0.3318	0.3233	0.3037	0.2924	0.2901	0.2823	0.2787	0.2772
Odd_rep1_trkH0.5_p3	0.1152	0.0987	0.0939	0.0959	0.096	0.1042	0.1121	0.1559	0.1781	0.2014	0.2638	0.3069	0.3546	0.3826	0.3959	0.4253	0.4279	0.44	0.4283	0.418	0.4116	0.3894	0.3927	0.3825	0.3686
Odd_rep1_dgoR0.5_p3	0.1114	0.0983	0.0952	0.0943	0.094	0.0985	0.1047	0.1372	0.1535	0.1829	0.2135	0.3907	0.3945	0.4029	0.4364	0.4515	0.4575	0.4588	0.4563	0.4502	0.4361	0.4331	0.4171	0.4078	0.4001
Odd_rep1_ybcV0.5_p3	0.1067	0.0983	0.0992	0.0971	0.0993	0.1	0.1175	0.1498	0.1776	0.2095	0.2424	0.2676	0.2794	0.2925	0.2946	0.2929	0.2919	0.2893	0.2763	0.267	0.2584	0.2527	0.2479	0.2451	0.2407
Odd_rep1_marR0.5_p3	0.113	0.1232	0.1192	0.118	0.1188	0.1233	0.1361	0.1669	0.2	0.2425	0.2709	0.296	0.3382	0.3377	0.3355	0.3392	0.3344	0.3297	0.3155	0.3096	0.3054	0.2967	0.2901	0.2826	0.2739
Odd_rep1_ypjC0.5_p3	0.1345	0.1293	0.1319	0.1312	0.1295	0.1337	0.147	0.1771	0.207	0.2456	0.2805	0.2942	0.3222	0.3463	0.3398	0.3475	0.3398	0.3355	0.3207	0.3149	0.3087	0.3083	0.3021	0.2941	0.2901
Odd_rep1_yabP0.5_p3	0.1061	0.0941	0.092	0.0915	0.093	0.0982	0.1115	0.1417	0.1795	0.2163	0.2389	0.2626	0.2806	0.3035	0.3039	0.2993	0.2991	0.2923	0.2827	0.2733	0.2689	0.2637	0.2578	0.2522	0.2475
Odd_rep1_ycjD0.5_p3	0.1325	0.1245	0.117	0.119	0.1231	0.1304	0.1182	0.1458	0.176	0.2115	0.2382	0.2568	0.271	0.2884	0.2915	0.2908	0.294	0.2868	0.277	0.2685	0.264	0.2559	0.2511	0.2446	0.2413
Odd_rep1_ubiH0.5_p3	0.1025	0.0904	0.0882	0.0897	0.0907	0.0937	0.1057	0.1364	0.1701	0.2152	0.2466	0.2729	0.2908	0.3046	0.3084	0.3203	0.3069	0.3016	0.2911	0.2903	0.2758	0.2659	0.2613	0.2537	0.2502
Odd_rep1_glpR0.5_p3	0.1008	0.09	0.0872	0.0883	0.0888	0.0917	0.1034	0.1355	0.1688	0.2102	0.2368	0.2602	0.2977	0.3356	0.3353	0.3524	0.337	0.3333	0.3249	0.328	0.3117	0.2968	0.2957	0.2849	0.2808
Odd_rep1_ybbC0.5_p3	0.1009	0.0905	0.0875	0.0883	0.0899	0.0971	0.1101	0.146	0.1793	0.2195	0.2601	0.2749	0.3226	0.32	0.3217	0.3207	0.322	0.32	0.312	0.2913	0.2856	0.283	0.2759	0.2696	0.2638
Odd_rep1_gadE0.5_p3	0.1055	0.093	0.091	0.0907	0.093	0.0957	0.1081	0.1469	0.1825	0.2214	0.2711	0.2727	0.3183	0.3225	0.3299	0.3424	0.3394	0.3279	0.3186	0.3135	0.2994	0.295	0.286	0.2797	0.2776
Odd_rep1_BW0.5_p3	0.1039	0.092	0.0893	0.0892	0.0917	0.0961	0.1165	0.1529	0.1745	0.2096	0.2395	0.2562	0.2974	0.3143	0.3318	0.3314	0.3367	0.3329	0.3178	0.3099	0.3033	0.2967	0.2852	0.28	0.272
Odd_rep1_MG0.5_p3	0.1059	0.0947	0.0921	0.0921	0.0933	0.0983	0.1164	0.1489	0.181	0.2101	0.2526	0.2871	0.3006	0.3311	0.331	0.3322	0.3255	0.3207	0.3086	0.2945	0.287	0.2854	0.2736	0.2688	0.2651
Odd_rep1_Triclosan_resistant_BW0.5_p3	0.1087	0.0958	0.0928	0.0909	0.0921	0.0906	0.0916	0.1163	0.1514	0.1697	0.2463	0.3387	0.3328	0.361	0.3645	0.3972	0.3996	0.3979	0.3927	0.3937	0.3843	0.3758	0.3719	0.3709	0.3671
Odd_rep1_ptsN0.125_p3	0.1195	0.1057	0.1023	0.1022	0.1134	0.2084	0.3159	0.363	0.3978	0.4079	0.3997	0.3908	0.3851	0.3742	0.3549	0.334	0.3224	0.3208	0.3418	0.3646	0.3819	0.4023	0.4366	0.4663	0.5094
Odd_rep1_trkA0.125_p3	0.1219	0.1074	0.1042	0.1073	0.124	0.1621	0.227	0.2531	0.297	0.2973	0.2995	0.2981	0.2936	0.2857	0.277	0.2641	0.2597	0.2458	0.2323	0.2209	0.2108	0.2091	0.2071	0.2039	0.2042
Odd_rep1_rsmB0.125_p3	0.1327	0.1162	0.1132	0.1162	0.1339	0.1797	0.2371	0.2664	0.3077	0.3198	0.323	0.3263	0.3221	0.3153	0.3127	0.3012	0.2906	0.2819	0.2723	0.2721	0.2681	0.274	0.2858	0.2984	0.3145
Odd_rep1_tatC0.125_p3	0.11	0.0981	0.0974	0.1009	0.1252	0.1707	0.227	0.2575	0.2998	0.322	0.3211	0.3195	0.318	0.3095	0.2955	0.2804	0.2717	0.2531	0.2368	0.2241	0.2166	0.2078	0.2044	0.2011	0.2007
Odd_rep1_NusBinsteadofA0.125_p3	0.1113	0.0994	0.0984	0.1016	0.1173	0.1616	0.2059	0.2358	0.2825	0.3176	0.3121	0.313	0.3105	0.2998	0.2908	0.281	0.2689	0.2574	0.2481	0.2356	0.227	0.2176	0.2089	0.2036	0.2007
Odd_rep1_greA0.125_p3	0.1091	0.098	0.097	0.1003	0.1188	0.1647	0.2161	0.2444	0.2882	0.3151	0.307	0.3064	0.2941	0.2842	0.2827	0.2679	0.258	0.2448	0.2348	0.2245	0.2159	0.2076	0.2043	0.1982	0.2
Odd_rep1_metL0.125_p3	0.1164	0.1041	0.1022	0.1032	0.1071	0.1244	0.1576	0.2076	0.2284	0.2458	0.2815	0.2921	0.3021	0.2998	0.2906	0.2844	0.276	0.2674	0.2625	0.2547	0.2461	0.2385	0.2305	0.2227	0.2196
Odd_rep1_yhiL0.125_p3	0.1041	0.0937	0.0933	0.0966	0.1202	0.1649	0.2226	0.2459	0.294	0.3108	0.3191	0.3101	0.3061	0.2986	0.286	0.2744	0.264	0.2531	0.241	0.2281	0.2186	0.2116	0.1999	0.2026	0.1977
Odd_rep1_wzzE0.125_p3	0.1058	0.0941	0.094	0.0967	0.1312	0.1601	0.2152	0.2393	0.2879	0.3166	0.3212	0.3155	0.3068	0.2985	0.2901	0.276	0.2658	0.2547	0.2419	0.2279	0.2197	0.2106	0.2034	0.2023	0.1965
Odd_rep1_fimI0.125_p3	0.1043	0.0929	0.0907	0.0952	0.1094	0.1578	0.2067	0.2307	0.2938	0.3269	0.3371	0.3386	0.329	0.3243	0.3126	0.3002	0.2876	0.277	0.2643	0.2462	0.2342	0.2251	0.2151	0.2105	0.2073
Odd_rep1_trkH0.125_p3	0.1031	0.092	0.0888	0.0941	0.1063	0.1642	0.2357	0.2614	0.3122	0.3363	0.339	0.3342	0.3276	0.3164	0.3081	0.2938	0.2818	0.2659	0.2565	0.2433	0.2337	0.2272	0.2191	0.2209	0.2205
Odd_rep1_dgoR0.125_p3	0.1064	0.0948	0.0914	0.0918	0.102	0.1174	0.1649	0.2902	0.353	0.4247	0.4665	0.482	0.4684	0.4421	0.4029	0.3811	0.3549	0.3343	0.3141	0.2991	0.2844	0.2718	0.2609	0.2559	0.2507
Odd_rep1_ybcV0.125_p3	0.0946	0.0846	0.0823	0.0825	0.0879	0.1107	0.1939	0.3273	0.3721	0.424	0.437	0.4386	0.4223	0.4046	0.3791	0.3529	0.3318	0.3129	0.2925	0.2754	0.2575	0.2507	0.2405	0.2344	0.2285
Odd_rep1_marR0.125_p3	0.099	0.0883	0.0857	0.0898	0.1029	0.1384	0.2078	0.2475	0.2722	0.3001	0.3019	0.303	0.298	0.2939	0.2864	0.2766	0.2672	0.2563	0.2457	0.2335	0.222	0.2156	0.2068	0.2047	0.1936
Odd_rep1_ypjC0.125_p3	0.1041	0.093	0.0916	0.0945	0.1123	0.1639	0.2119	0.2534	0.2995	0.3252	0.3215	0.3136	0.3116	0.2999	0.2949	0.2843	0.2786	0.273	0.2733	0.2842	0.291	0.3246	0.3633	0.4285	0.5219
Odd_rep1_yabP0.125_p3	0.1063	0.0926	0.0911	0.0946	0.1161	0.1818	0.2214	0.2591	0.3124	0.3387	0.3452	0.3559	0.3609	0.3638	0.3752	0.4001	0.4395	0.5044	0.5838	0.6877	0.7824	0.875	0.952	1.015	1.0895
Odd_rep1_ycjD0.125_p3	0.1105	0.0993	0.0979	0.1011	0.1256	0.1712	0.2379	0.2731	0.3221	0.3612	0.4264	0.4765	0.5023	0.5236	0.5346	0.5435	0.5452	0.5681	0.5734	0.6079	0.6587	0.7586	0.8783	1.1235	1.3226
Odd_rep1_ubiH0.125_p3	0.1091	0.0972	0.0968	0.1016	0.1222	0.1711	0.2241	0.2592	0.2983	0.3132	0.3292	0.3165	0.3054	0.2986	0.2891	0.2808	0.2717	0.2683	0.253	0.2496	0.2378	0.248	0.255	0.2701	0.2761
Odd_rep1_glpR0.125_p3	0.1125	0.1005	0.0995	0.1028	0.1192	0.1607	0.2161	0.2465	0.3029	0.3148	0.3052	0.304	0.2985	0.2956	0.2804	0.2796	0.2648	0.2464	0.2387	0.2293	0.2186	0.2041	0.2086	0.2053	0.2024
Odd_rep1_ybbC0.125_p3	0.1061	0.0939	0.0925	0.0964	0.1178	0.1711	0.2157	0.2474	0.3021	0.3272	0.3123	0.3116	0.3059	0.2976	0.2895	0.2874	0.2897	0.3006	0.3177	0.3515	0.3858	0.4166	0.4371	0.4531	0.4648
Odd_rep1_gadE0.125_p3	0.1055	0.0939	0.0923	0.0948	0.1051	0.1424	0.1796	0.2174	0.2439	0.2916	0.3118	0.3138	0.318	0.3044	0.2997	0.2899	0.2823	0.2728	0.2587	0.2486	0.2392	0.2311	0.2215	0.2159	0.213
Odd_rep1_BW0.125_p3	0.1064	0.0946	0.0931	0.095	0.1124	0.1581	0.2044	0.2383	0.2936	0.3152	0.3107	0.3085	0.3011	0.2913	0.2797	0.2688	0.2618	0.2483	0.2317	0.2227	0.2144	0.2165	0.2178	0.2162	0.2162
Odd_rep1_MG0.125_p3	0.1081	0.1227	0.1154	0.0964	0.1035	0.1383	0.1866	0.2268	0.249	0.2611	0.2905	0.3005	0.3048	0.3063	0.3022	0.2938	0.2863	0.2852	0.281	0.2721	0.2635	0.2561	0.2589	0.2459	0.239
Odd_rep1_Triclosan_resistant_BW0.125_p3	0.1203	0.0935	0.0912	0.0929	0.1004	0.1219	0.1544	0.1835	0.23	0.304	0.3735	0.3946	0.4023	0.3948	0.3699	0.3552	0.3374	0.3301	0.3112	0.2998	0.2918	0.2838	0.2685	0.2565	0.2502
Odd_rep1_ptsN0.015_p3	0.1069	0.095	0.0935	0.0997	0.1783	0.3328	0.6607	0.9062	1.0747	1.1604	1.2721	1.3978	1.4877	1.5565	1.5907	1.6348	1.6854	1.7225	1.7626	1.8008	1.8372	1.867	1.8835	1.8968	1.9053
Odd_rep1_trkA0.015_p3	0.1033	0.0933	0.0934	0.1095	0.1684	0.2996	0.5719	0.9099	1.1614	1.2442	1.347	1.4666	1.6004	1.7072	1.7458	1.789	1.8244	1.8539	1.8792	1.9035	1.9236	1.9417	1.9617	1.9756	1.9925
Odd_rep1_rsmB0.015_p3	0.1055	0.0956	0.0957	0.1122	0.1888	0.397	0.6958	1.049	1.2562	1.3644	1.4698	1.5635	1.6151	1.6799	1.7454	1.7664	1.7902	1.8235	1.8436	1.901	1.9146	1.9412	1.9663	1.9892	2.0028
Odd_rep1_tatC0.015_p3	0.1032	0.0946	0.0944	0.1057	0.1519	0.2213	0.3046	0.3222	0.343	0.3473	0.3708	0.3754	0.3777	0.3941	0.4334	0.4992	0.5785	0.6326	0.6949	0.6955	0.7041	0.7019	0.6924	0.693	0.6918
Odd_rep1_NusBinsteadofA0.015_p3	0.1071	0.0972	0.0979	0.109	0.1634	0.2585	0.4549	0.5959	0.6794	0.7116	0.7298	0.7723	0.8012	0.8277	0.8709	0.9073	0.9486	0.9959	0.9775	0.9948	1.0218	1.0619	1.1553	1.3173	1.4525
Odd_rep1_greA0.015_p3	0.1177	0.1052	0.1054	0.1179	0.183	0.3497	0.5745	0.7974	1.1164	1.2395	1.3067	1.3775	1.445	1.5215	1.5369	1.5677	1.6091	1.6691	1.7411	1.8102	1.845	1.8705	1.889	1.9151	1.9335
Odd_rep1_metL0.015_p3	0.116	0.105	0.1043	0.1201	0.1706	0.3017	0.43	0.6131	0.9816	1.1584	1.2941	1.434	1.5461	1.614	1.6765	1.727	1.7703	1.808	1.8476	1.8677	1.8926	1.9025	1.9189	1.926	1.9352
Odd_rep1_yhiL0.015_p3	0.1061	0.0951	0.0951	0.1093	0.1925	0.3825	0.6698	1.0236	1.1992	1.31	1.4034	1.4923	1.5626	1.6438	1.696	1.7446	1.79	1.8307	1.873	1.9058	1.9344	1.9636	1.9862	1.9946	2.0132
Odd_rep1_wzzE0.015_p3	0.1265	0.1424	0.1423	0.1539	0.2089	0.3723	0.6536	0.839	0.9817	1.1224	1.2214	1.2881	1.3337	1.4079	1.5058	1.5989	1.6857	1.7548	1.8201	1.8616	1.8874	1.9163	1.9337	1.9586	1.9791
Odd_rep1_fimI0.015_p3	0.1069	0.095	0.0953	0.1068	0.1589	0.2987	0.539	0.787	0.949	1.084	1.23	1.3379	1.3815	1.4603	1.5215	1.5922	1.6525	1.6961	1.7349	1.7602	1.7883	1.8064	1.8287	1.8489	1.871
Odd_rep1_trkH0.015_p3	0.1043	0.0926	0.0919	0.1011	0.1453	0.2774	0.6025	0.8535	0.9369	0.9947	1.0983	1.205	1.2718	1.355	1.4322	1.5265	1.622	1.7013	1.7815	1.8417	1.8866	1.9084	1.9355	1.9554	1.9808
Odd_rep1_dgoR0.015_p3	0.1021	0.0898	0.0886	0.0926	0.129	0.2859	0.523	0.8052	0.9505	1.0515	1.1418	1.2611	1.3591	1.4788	1.5552	1.6166	1.6847	1.7254	1.7702	1.7822	1.8127	1.8258	1.8194	1.8378	1.8518
Odd_rep1_ybcV0.015_p3	0.1116	0.1011	0.0998	0.1093	0.1622	0.3101	0.6718	0.9908	1.1367	1.2566	1.3479	1.4642	1.5625	1.5866	1.6232	1.6651	1.6986	1.7418	1.7766	1.8086	1.8344	1.8468	1.8665	1.8822	1.8949
Odd_rep1_marR0.015_p3	0.1078	0.0981	0.0976	0.1119	0.2098	0.3732	0.5581	0.8383	1.0139	1.1407	1.2684	1.3943	1.4862	1.5616	1.655	1.6748	1.7174	1.7855	1.8347	1.87	1.8982	1.9113	1.9305	1.9433	1.9599
Odd_rep1_ypjC0.015_p3	0.1082	0.0982	0.0988	0.1124	0.1886	0.3884	0.7767	1.1092	1.2576	1.3487	1.4607	1.5628	1.6507	1.7088	1.7535	1.7701	1.8052	1.8416	1.871	1.9024	1.9346	1.9565	1.9834	1.9995	2.0134
Odd_rep1_yabP0.015_p3	0.1088	0.0999	0.1514	0.1866	0.2072	0.3958	0.5879	0.84	1.0079	1.0974	1.2013	1.2687	1.3489	1.4124	1.4727	1.5386	1.6077	1.6877	1.7356	1.7892	1.8347	1.8742	1.9004	1.9217	1.9334
Odd_rep1_ycjD0.015_p3	0.1085	0.0987	0.0999	0.1176	0.1881	0.3538	0.52	0.767	0.9716	1.083	1.1984	1.3302	1.433	1.5298	1.6141	1.6371	1.6802	1.7357	1.797	1.848	1.898	1.9301	1.9598	1.9827	1.9889
Odd_rep1_ubiH0.015_p3	0.1155	0.1051	0.1051	0.1162	0.1749	0.2946	0.4821	0.5562	0.599	0.6164	0.6389	0.64	0.6282	0.6222	0.6145	0.6244	0.6411	0.6724	0.6973	0.7427	0.7864	0.8201	0.8649	0.9008	0.9307
Odd_rep1_glpR0.015_p3	0.1168	0.1065	0.1068	0.1247	0.2022	0.4164	0.806	1.109	1.2549	1.3495	1.423	1.5187	1.6017	1.68	1.7375	1.7725	1.8097	1.8456	1.8776	1.9173	1.9293	1.9415	1.9575	1.9779	1.99
Odd_rep1_ybbC0.015_p3	0.1068	0.097	0.0979	0.1122	0.1987	0.3848	0.6408	0.9905	1.1841	1.2992	1.3832	1.4692	1.5458	1.6217	1.6725	1.7118	1.7586	1.7982	1.834	1.8688	1.9072	1.9333	1.9606	1.9756	1.9949
Odd_rep1_gadE0.015_p3	0.1049	0.0937	0.0926	0.1064	0.1749	0.3776	0.7431	1.1511	1.2898	1.3853	1.4781	1.5737	1.6473	1.7082	1.748	1.7714	1.8024	1.8356	1.8658	1.895	1.9233	1.9495	1.9681	1.9922	2.0123
Odd_rep1_BW0.015_p3	0.1031	0.093	0.092	0.1036	0.1778	0.311	0.4663	0.6392	0.8014	0.9106	0.9927	1.0806	1.1487	1.2429	1.3108	1.3638	1.4007	1.4481	1.4927	1.554	1.6247	1.7037	1.7547	1.7903	1.8255
Odd_rep1_MG0.015_p3	0.1045	0.0924	0.0928	0.1062	0.1675	0.2722	0.5044	0.4975	0.6481	0.9932	1.2124	1.4646	1.5863	1.6908	1.7503	1.7917	1.8181	1.844	1.8698	1.9055	1.9331	1.9579	1.9741	2.0029	2.0109
Odd_rep1_Triclosan_resistant_BW0.015_p3	0.1051	0.093	0.0915	0.0973	0.1549	0.3001	0.4624	0.7066	0.8784	1.1148	1.2103	1.2809	1.3311	1.3745	1.4212	1.4769	1.4879	1.5011	1.5152	1.5186	1.5395	1.5616	1.6048	1.66	1.7217
Odd_rep1_ptsN_p3	0.1054	0.093	0.0914	0.0973	0.1359	0.3474	0.6816	1.0859	1.2554	1.3039	1.3954	1.4921	1.5771	1.6274	1.6639	1.6998	1.7297	1.7596	1.7824	1.8146	1.8404	1.8539	1.8743	1.8988	1.9114
Odd_rep1_trkA_p3	0.1054	0.0949	0.0944	0.1049	0.1698	0.3604	0.7793	1.064	1.2731	1.3356	1.4385	1.5251	1.6216	1.707	1.7514	1.7902	1.8295	1.8683	1.8952	1.9117	1.9297	1.9412	1.9465	1.9561	1.9578
Odd_rep1_rsmB_p3	0.1074	0.0964	0.0957	0.1124	0.1989	0.3938	0.7319	1.0454	1.2234	1.3199	1.4095	1.4993	1.5689	1.6253	1.6716	1.7103	1.7469	1.7829	1.8109	1.8487	1.8788	1.9008	1.9311	1.9569	1.9786
Odd_rep1_tatC_p3	0.1017	0.0906	0.0896	0.093	0.1367	0.2419	0.4408	0.4971	0.5369	0.5708	0.5677	0.5749	0.6096	0.6386	0.695	0.7513	0.8208	0.82	0.8227	0.825	0.8251	0.82	0.8111	0.798	0.7861
Odd_rep1_NusBinsteadofA_p3	0.1037	0.0921	0.0908	0.1064	0.1649	0.2552	0.4848	0.692	0.704	0.7368	0.749	0.7669	0.7934	0.8166	0.8562	0.8968	0.9221	0.9217	0.9103	0.9357	0.9552	0.9812	1.0158	1.0481	1.0967
Odd_rep1_greA_p3	0.1076	0.0967	0.0956	0.1067	0.2098	0.3984	0.7299	0.9603	1.2004	1.2735	1.3297	1.4053	1.4984	1.5574	1.5822	1.6147	1.6614	1.712	1.7438	1.7745	1.8117	1.8295	1.8543	1.8779	1.8972
Odd_rep1_metL_p3	0.1157	0.1121	0.1129	0.1229	0.2025	0.3016	0.4463	0.6466	0.846	1.0264	1.2473	1.4091	1.5145	1.5798	1.6352	1.6767	1.7245	1.7558	1.7798	1.7949	1.8163	1.8468	1.8677	1.8694	1.8722
Odd_rep1_yhiL_p3	0.1014	0.09	0.0897	0.1064	0.1946	0.3456	0.7978	1.0923	1.229	1.3019	1.385	1.4842	1.568	1.6439	1.6738	1.7043	1.7414	1.7889	1.8234	1.8586	1.8885	1.908	1.9302	1.9505	1.9635
Odd_rep1_wzzE_p3	0.1049	0.0932	0.0921	0.1038	0.1732	0.3743	0.6867	0.8477	1.0075	1.1219	1.2183	1.283	1.3359	1.3931	1.4909	1.5759	1.6504	1.706	1.7585	1.8019	1.8347	1.856	1.876	1.8867	1.9039
Odd_rep1_fimI_p3	0.1042	0.092	0.0908	0.1011	0.1696	0.2739	0.5331	0.7816	0.9437	1.045	1.1725	1.2834	1.3495	1.4473	1.5024	1.5568	1.6062	1.6482	1.6873	1.721	1.7602	1.777	1.7923	1.8107	1.8256
Odd_rep1_trkH_p3	0.105	0.0938	0.0921	0.1001	0.1595	0.2875	0.6197	0.7924	0.8988	0.9987	1.0718	1.1779	1.2759	1.373	1.4706	1.565	1.636	1.6946	1.7441	1.7935	1.8368	1.8583	1.8897	1.9143	1.9355
Odd_rep1_dgoR_p3	0.1017	0.0903	0.0889	0.093	0.1275	0.3269	0.6434	0.7154	0.7958	0.9019	1.0763	1.2163	1.299	1.382	1.46	1.524	1.5803	1.6305	1.695	1.7344	1.7802	1.8032	1.8343	1.847	1.8564
Odd_rep1_ybcV_p3	0.1004	0.0907	0.0901	0.0954	0.1489	0.3428	0.6601	1.0578	1.1628	1.306	1.4157	1.5247	1.6133	1.6216	1.662	1.6906	1.7351	1.7625	1.7924	1.8177	1.8444	1.8674	1.8843	1.8981	1.9142
Odd_rep1_marR_p3	0.1058	0.0947	0.0936	0.1065	0.2136	0.3654	0.7557	0.9508	1.0883	1.1931	1.2779	1.3674	1.4613	1.5424	1.5697	1.5995	1.6423	1.6671	1.7029	1.7258	1.7639	1.7836	1.8214	1.8523	1.8671
Odd_rep1_ypjC_p3	0.1055	0.0957	0.0949	0.1046	0.183	0.3759	0.884	1.0524	1.1309	1.1887	1.2898	1.4344	1.5497	1.6331	1.6874	1.7212	1.762	1.7931	1.8203	1.8474	1.8701	1.8786	1.8935	1.9142	1.939
Odd_rep1_yabP_p3	0.1019	0.0918	0.0907	0.0993	0.1614	0.3165	0.5769	0.8163	1.0072	1.0795	1.1373	1.1985	1.2674	1.3346	1.3927	1.4533	1.5131	1.5651	1.6131	1.6592	1.6985	1.749	1.7956	1.8413	1.8673
Odd_rep1_ycjD_p3	0.104	0.0947	0.0927	0.0983	0.168	0.3791	0.843	1.072	1.1329	1.2483	1.3688	1.5237	1.5952	1.6535	1.6841	1.701	1.7264	1.7411	1.7585	1.7757	1.7967	1.8154	1.8356	1.8619	1.8817
Odd_rep1_ubiH_p3	0.1114	0.1002	0.0984	0.1031	0.1383	0.2123	0.4445	0.5398	0.6538	0.6923	0.7283	0.7534	0.7693	0.7851	0.8045	0.8154	0.8296	0.8502	0.8684	0.9001	0.9257	0.9688	1.0162	1.0668	1.113
Odd_rep1_glpR_p3	0.1033	0.0931	0.0909	0.0975	0.1687	0.4213	0.9821	1.1765	1.2844	1.3898	1.4932	1.5936	1.6795	1.7493	1.778	1.808	1.8408	1.8663	1.8844	1.9074	1.9324	1.9459	1.9545	1.9517	1.952
Odd_rep1_ybbC_p3	0.1247	0.0923	0.0904	0.0953	0.1822	0.342	0.7243	0.9717	1.0905	1.1475	1.2421	1.346	1.4429	1.5116	1.5383	1.5726	1.6049	1.6309	1.6518	1.6807	1.6984	1.7158	1.733	1.7529	1.7686
Odd_rep1_gadE_p3	0.1207	0.1112	0.1099	0.1154	0.1659	0.3173	0.9626	1.183	1.2836	1.329	1.4	1.5183	1.613	1.661	1.7029	1.7292	1.7579	1.7827	1.7974	1.8169	1.8326	1.8405	1.8591	1.8721	1.8937
Odd_rep1_BW_p3	0.1059	0.095	0.0931	0.0981	0.1444	0.3469	0.5682	0.8898	1.0175	1.1558	1.228	1.3375	1.3849	1.4176	1.4563	1.4748	1.5016	1.5156	1.5314	1.5522	1.5697	1.5812	1.6043	1.6287	1.6505
Odd_rep1_MG_p3	0.103	0.0919	0.0898	0.095	0.1388	0.2317	0.3864	0.6113	0.803	1.0639	1.2262	1.3441	1.4633	1.5646	1.6514	1.6876	1.7214	1.7534	1.7808	1.8058	1.8299	1.8463	1.8792	1.8981	1.9197
Odd_rep1_Triclosan_resistant_BW_p3	0.1035	0.0926	0.0901	0.0952	0.1569	0.3983	0.7296	1.0145	1.1698	1.3295	1.3774	1.4588	1.512	1.5502	1.6083	1.6657	1.7125	1.7541	1.7738	1.7936	1.8044	1.8127	1.8238	1.837	1.8577
Odd_rep1_ompX0.5_p7	0.1365	0.1259	0.1235	0.1218	0.1209	0.1202	0.1195	0.1192	0.1179	0.1184	0.1183	0.1175	0.1185	0.1177	0.1172	0.117	0.1172	0.1169	0.1172	0.1169	0.1166	0.1165	0.1159	0.1146	0.1148
Odd_rep1_purH0.5_p7	0.1328	0.1137	0.1111	0.1117	0.1185	0.1088	0.1064	0.1063	0.1058	0.1058	0.1045	0.1044	0.1042	0.1041	0.1032	0.1032	0.1031	0.1023	0.1034	0.1026	0.1023	0.1025	0.1041	0.1028	0.1032
Odd_rep1_acrR0.5_p7	0.1225	0.1046	0.1008	0.0987	0.0971	0.0962	0.0954	0.0956	0.095	0.0949	0.0947	0.094	0.0942	0.0942	0.0941	0.0934	0.0935	0.0935	0.0928	0.0926	0.0924	0.0923	0.092	0.0917	0.0913
Odd_rep1_kgtP0.5_p7	0.1288	0.108	0.1042	0.1023	0.1013	0.1008	0.0998	0.0997	0.0984	0.0985	0.0983	0.0979	0.0975	0.097	0.0966	0.0957	0.0978	0.0976	0.0975	0.0966	0.0974	0.0978	0.0976	0.0977	0.0978
Odd_rep1_napD0.5_p7	0.1111	0.0976	0.0942	0.0932	0.0917	0.0911	0.0912	0.0903	0.0897	0.0901	0.09	0.09	0.0903	0.0901	0.0899	0.0897	0.0896	0.0893	0.089	0.0891	0.0895	0.0894	0.0891	0.0888	0.0882
Odd_rep1_pcnB0.5_p7	0.1168	0.1033	0.1008	0.0986	0.0973	0.0968	0.0965	0.0965	0.0962	0.0958	0.0951	0.0949	0.0941	0.0941	0.0938	0.094	0.0941	0.0938	0.0934	0.0938	0.0941	0.094	0.0938	0.0933	0.0932
Odd_rep1_aroK0.5_p7	0.1173	0.103	0.1001	0.0985	0.0971	0.0962	0.0956	0.0961	0.0963	0.0943	0.0936	0.0939	0.0937	0.0936	0.0932	0.0921	0.0927	0.0925	0.0922	0.0923	0.093	0.093	0.0927	0.0927	0.092
Odd_rep1_ynfD0.5_p7	0.1121	0.0986	0.0956	0.0942	0.0924	0.0917	0.0909	0.0917	0.0902	0.09	0.0892	0.0901	0.0893	0.0887	0.0891	0.0883	0.0883	0.0881	0.0878	0.0877	0.0881	0.0884	0.0885	0.0884	0.0876
Odd_rep1_lacA0.5_p7	0.126	0.1079	0.1046	0.1045	0.1028	0.1042	0.1029	0.103	0.1023	0.1027	0.1016	0.102	0.103	0.1017	0.1027	0.1018	0.1019	0.1022	0.1022	0.1019	0.1015	0.1006	0.1007	0.1008	0.1001
Odd_rep1_nikB0.5_p7	0.1064	0.0954	0.0927	0.0921	0.0915	0.0916	0.0907	0.0907	0.0898	0.09	0.0916	0.0897	0.0903	0.0891	0.0898	0.0891	0.0893	0.089	0.0894	0.0892	0.0891	0.089	0.0883	0.0882	0.0878
Odd_rep1_guaD0.5_p7	0.1195	0.1052	0.1022	0.1014	0.1008	0.1012	0.0997	0.0999	0.0991	0.099	0.0985	0.0983	0.0997	0.0989	0.0986	0.0978	0.0981	0.0983	0.0981	0.0987	0.098	0.0976	0.0966	0.0965	0.0965
Odd_rep1_SL13540.5_p7	0.1098	0.0971	0.0934	0.0929	0.0923	0.0928	0.0917	0.092	0.0912	0.0917	0.0909	0.0909	0.0924	0.0906	0.0913	0.0902	0.0903	0.091	0.0907	0.0905	0.0894	0.0894	0.0898	0.0894	0.0882
Odd_rep1_SL7020.5_p7	0.1117	0.1034	0.0965	0.1235	0.1322	0.3049	0.7918	1.1158	1.3165	1.4474	1.4648	1.5131	1.6199	1.78	1.875	1.9314	1.9583	1.977	2.0049	2.0111	2.0191	2.0249	2.0259	2.0277	2.0277
Odd_rep1_BW0.5_p7	0.1077	0.0953	0.0923	0.0918	0.0904	0.0906	0.0895	0.0896	0.0891	0.0891	0.0892	0.0889	0.0893	0.0891	0.0886	0.0885	0.0884	0.0887	0.0886	0.0882	0.0884	0.0886	0.0877	0.0874	0.0875
Odd_rep1_MG0.5_p7	0.1094	0.0975	0.095	0.0933	0.0929	0.0928	0.0923	0.0929	0.092	0.0926	0.0922	0.0917	0.0925	0.0927	0.092	0.0913	0.0915	0.0915	0.0916	0.0911	0.0923	0.0911	0.0905	0.0897	0.0895
Odd_rep1_Triclosan_resistant_BW0.5_p7	0.1041	0.0926	0.0893	0.0883	0.0878	0.0903	0.1125	0.1397	0.2459	0.342	0.4439	0.5571	0.6356	0.6978	0.7418	0.7778	0.7994	0.818	0.8514	0.8866	0.9161	0.9533	0.9851	1.036	1.0881
Odd_rep1_ompX0.125_p7	0.1196	0.1062	0.1034	0.1017	0.1007	0.1003	0.1001	0.1023	0.123	0.2568	0.446	0.5477	0.9521	1.2214	1.3825	1.4678	1.5432	1.6113	1.6824	1.7396	1.7913	1.8398	1.8905	1.9297	1.963
Odd_rep1_purH0.125_p7	0.1301	0.1145	0.1117	0.1101	0.1095	0.1098	0.1152	0.1397	0.2259	0.3508	0.4829	0.6449	0.8599	1.0941	1.2721	1.4079	1.5187	1.622	1.7113	1.7866	1.8575	1.9051	1.9433	1.9744	1.9768
Odd_rep1_acrR0.125_p7	0.1279	0.1153	0.1134	0.1114	0.1108	0.1084	0.1074	0.1072	0.1071	0.1073	0.1064	0.107	0.1053	0.105	0.1049	0.1045	0.1044	0.1061	0.1044	0.1048	0.1048	0.1048	0.1037	0.1052	0.1049
Odd_rep1_kgtP0.125_p7	0.1266	0.1157	0.1134	0.1126	0.1125	0.118	0.1494	0.2456	0.3588	0.494	0.751	1.0798	1.2826	1.433	1.5675	1.6784	1.7855	1.8769	1.9469	1.9938	2.0191	2.0323	2.0548	2.0607	2.0715
Odd_rep1_napD0.125_p7	0.121	0.1102	0.1086	0.1073	0.1067	0.105	0.1047	0.105	0.106	0.1109	0.1286	0.197	0.2869	0.4065	0.5274	0.6743	0.8151	0.9408	1.1392	1.332	1.4802	1.5909	1.6738	1.7474	1.8157
Odd_rep1_pcnB0.125_p7	0.1188	0.1074	0.1056	0.1059	0.109	0.1135	0.1306	0.1846	0.3019	0.4307	0.7725	1.1756	1.3614	1.4659	1.5638	1.6401	1.7155	1.7858	1.8522	1.9047	1.9516	1.9737	1.9975	2.0085	2.024
Odd_rep1_aroK0.125_p7	0.1245	0.1118	0.1099	0.1094	0.1115	0.1243	0.213	0.3527	0.5317	0.7419	0.9612	1.1583	1.3027	1.4252	1.5192	1.6098	1.687	1.7563	1.82	1.8617	1.8903	1.9268	1.9594	1.9743	1.9935
Odd_rep1_ynfD0.125_p7	0.1127	0.1115	0.1018	0.1019	0.0986	0.102	0.1197	0.1917	0.2957	0.4124	0.614	1.0122	1.2856	1.4334	1.5534	1.6624	1.7579	1.8285	1.9037	1.9327	1.9705	1.9932	2.0234	2.0218	2.046
Odd_rep1_lacA0.125_p7	0.1113	0.1016	0.0997	0.0997	0.0987	0.0988	0.0984	0.0985	0.0996	0.1118	0.1785	0.2866	0.4217	0.5578	0.7124	0.8586	1.0174	1.1752	1.3114	1.4136	1.5127	1.61	1.7066	1.7879	1.8801
Odd_rep1_nikB0.125_p7	0.1151	0.1036	0.1016	0.1012	0.1003	0.1009	0.1003	0.101	0.1443	0.3456	0.5572	0.7207	0.8509	0.9451	1.0076	1.0437	1.0855	1.1179	1.1423	1.1811	1.2426	1.3142	1.3909	1.4459	1.5126
Odd_rep1_guaD0.125_p7	0.1195	0.1083	0.107	0.1062	0.1058	0.1063	0.1073	0.1144	0.1436	0.2375	0.3789	0.4933	0.5739	0.6761	0.8453	1.0088	1.1324	1.2471	1.3767	1.4981	1.6041	1.7299	1.8497	1.9234	1.9647
Odd_rep1_SL13540.125_p7	0.1054	0.0936	0.0915	0.0909	0.0907	0.0908	0.0925	0.102	0.1228	0.2245	0.3544	0.5488	0.924	0.994	1.0823	1.118	1.177	1.1701	1.3754	1.4717	1.5085	1.5038	1.5012	1.523	1.5386
Odd_rep1_SL7020.125_p7	0.1121	0.1001	0.0983	0.0997	0.1193	0.2791	0.7544	1.11	1.1953	1.3525	1.5146	1.5703	1.6648	1.8233	1.9149	1.974	1.9994	2.0002	2.0229	2.0336	2.0423	2.0484	2.0557	2.0467	2.0517
Odd_rep1_BW0.125_p7	0.102	0.0902	0.089	0.0872	0.0896	0.1406	0.3383	0.504	0.6224	0.7046	0.7793	0.8189	0.8736	0.9259	0.9716	1.0151	1.062	1.112	1.1619	1.2028	1.2473	1.2989	1.3595	1.4136	1.5323
Odd_rep1_MG0.125_p7	0.107	0.0946	0.0921	0.0915	0.091	0.0909	0.09	0.0896	0.09	0.0898	0.0896	0.0892	0.09	0.0948	0.1156	0.1848	0.3368	0.4812	0.656	0.8035	0.9424	1.0984	1.1811	1.2027	1.1478
Odd_rep1_Triclosan_resistant_BW0.125_p7	0.1053	0.0926	0.0898	0.0894	0.0888	0.0959	0.2289	0.6032	0.7195	0.8732	0.9941	1.0098	1.0323	1.0517	1.0746	1.098	1.1267	1.158	1.1837	1.2058	1.2481	1.2883	1.3283	1.3623	1.4119
Odd_rep1_ompX0.015_p7	0.1192	0.1052	0.1034	0.11	0.2162	0.6013	0.8435	1.1465	1.2208	1.2976	1.3773	1.4502	1.535	1.6094	1.6522	1.6922	1.7292	1.7598	1.7953	1.8154	1.8426	1.8524	1.8687	1.8762	1.8894
Odd_rep1_purH0.015_p7	0.1199	0.1055	0.104	0.1114	0.2112	0.6094	0.9755	1.1817	1.2946	1.3747	1.4487	1.5166	1.5651	1.6254	1.6885	1.7378	1.7868	1.8229	1.854	1.8841	1.9097	1.9245	1.9317	1.9517	1.961
Odd_rep1_acrR0.015_p7	0.1214	0.1088	0.1074	0.1131	0.1796	0.4449	0.6922	1.0201	1.1451	1.2171	1.2994	1.3731	1.4473	1.4971	1.5317	1.5641	1.5918	1.6142	1.6413	1.6597	1.6877	1.7023	1.7263	1.7416	1.7657
Odd_rep1_kgtP0.015_p7	0.1143	0.1037	0.1027	0.1076	0.2166	0.5073	0.723	1.0969	1.2788	1.3695	1.4492	1.5272	1.6111	1.6547	1.6893	1.7235	1.7532	1.7818	1.8062	1.8215	1.8532	1.8622	1.886	1.8996	1.9188
Odd_rep1_napD0.015_p7	0.1207	0.1104	0.1102	0.1217	0.2223	0.528	0.8419	1.1832	1.2732	1.3419	1.4041	1.4636	1.517	1.5565	1.591	1.6301	1.6733	1.7115	1.7526	1.7823	1.81	1.839	1.865	1.8788	1.8997
Odd_rep1_pcnB0.015_p7	0.1241	0.1118	0.1116	0.1165	0.165	0.3953	0.8132	1.2104	1.3892	1.4826	1.587	1.6618	1.7439	1.8116	1.8658	1.9033	1.9363	1.9508	1.9763	1.9814	2.0036	2.0165	2.0365	2.0312	2.0457
Odd_rep1_aroK0.015_p7	0.1232	0.1121	0.1108	0.1113	0.1404	0.4354	0.7718	1.0557	1.1573	1.2495	1.3384	1.4128	1.4729	1.5375	1.5723	1.606	1.641	1.6701	1.7038	1.7324	1.7549	1.7842	1.8091	1.8325	1.8636
Odd_rep1_ynfD0.015_p7	0.1055	0.095	0.0944	0.0979	0.1434	0.3518	0.6185	1.0401	1.1685	1.2402	1.2972	1.3512	1.4092	1.4711	1.5203	1.538	1.5704	1.5855	1.6305	1.6524	1.6873	1.7176	1.7535	1.7676	1.7994
Odd_rep1_lacA0.015_p7	0.121	0.1094	0.1083	0.117	0.1863	0.3392	0.4736	0.6571	0.7945	0.8922	0.9772	1.0446	1.1179	1.2036	1.2652	1.3029	1.3331	1.367	1.4056	1.4403	1.4807	1.5223	1.5773	1.6215	1.6693
Odd_rep1_nikB0.015_p7	0.1164	0.1084	0.1084	0.1291	0.2004	0.3449	0.5054	0.643	0.761	0.8567	0.9498	1.0458	1.1415	1.2388	1.3271	1.3764	1.4141	1.4583	1.5009	1.5391	1.5846	1.6238	1.6625	1.6976	1.7341
Odd_rep1_guaD0.015_p7	0.1194	0.1069	0.1049	0.1107	0.1756	0.3754	0.703	0.9599	1.2916	1.4108	1.4564	1.4753	1.5163	1.5492	1.5757	1.5851	1.6161	1.6439	1.6795	1.702	1.7409	1.7635	1.7869	1.8068	1.8311
Odd_rep1_SL13540.015_p7	0.1098	0.1018	0.1003	0.102	0.1097	0.1476	0.3076	0.4234	0.4593	0.521	0.5582	0.655	0.811	1.0248	1.1606	1.2241	1.2777	1.3315	1.3908	1.4516	1.5179	1.5653	1.6156	1.6541	1.6965
Odd_rep1_SL7020.015_p7	0.1075	0.0966	0.0947	0.0964	0.1115	0.2621	0.7223	1.1272	1.2497	1.4385	1.5287	1.5932	1.7143	1.8834	1.9435	1.9709	1.9954	1.9893	2.0092	2.0151	2.0275	2.0344	2.0337	2.0325	2.0316
Odd_rep1_BW0.015_p7	0.1109	0.0997	0.111	0.1132	0.163	0.3231	0.4855	0.6194	0.6871	0.7699	0.8239	0.8705	0.9298	0.9895	1.0561	1.0876	1.1136	1.1396	1.1807	1.2149	1.2566	1.3	1.3519	1.3954	1.4434
Odd_rep1_MG0.015_p7	0.1101	0.1004	0.098	0.1029	0.1767	0.3323	0.4688	0.5545	0.6244	0.6883	0.7336	0.7801	0.8253	0.8584	0.9011	0.9404	1.0003	1.0608	1.1217	1.1404	1.162	1.1921	1.2308	1.2678	1.303
Odd_rep1_Triclosan_resistant_BW0.015_p7	0.1113	0.0992	0.0957	0.0953	0.0961	0.104	0.2277	0.6257	0.8014	0.8997	0.9934	1.0208	1.0809	1.1257	1.2229	1.2927	1.3345	1.4158	1.4326	1.4816	1.5182	1.5683	1.6066	1.6579	1.7015
Odd_rep1_ompX_p7	0.1198	0.1053	0.103	0.1085	0.1845	0.3985	0.6432	1.1242	1.2675	1.3627	1.3447	1.4263	1.549	1.621	1.6857	1.7349	1.7904	1.7896	1.8398	1.8571	1.8832	1.9018	1.9262	1.9358	1.9498
Odd_rep1_purH_p7	0.1369	0.1223	0.1193	0.1268	0.2434	0.6612	0.9548	1.0331	1.1754	1.2887	1.3973	1.4905	1.5669	1.6402	1.6976	1.7271	1.7651	1.8065	1.8344	1.8552	1.8825	1.9092	1.9306	1.9478	1.9677
Odd_rep1_acrR_p7	0.1235	0.1086	0.1061	0.11	0.1791	0.4639	0.9065	1.2436	1.2994	1.417	1.5	1.6018	1.6974	1.7599	1.8204	1.8474	1.8659	1.8803	1.8991	1.9233	1.939	1.9402	1.9698	1.993	2.0125
Odd_rep1_kgtP_p7	0.1324	0.1176	0.1151	0.1212	0.1855	0.4802	0.7865	1.178	1.2724	1.3615	1.4335	1.5086	1.5842	1.6399	1.6823	1.7204	1.7555	1.788	1.8246	1.8452	1.8798	1.9022	1.9339	1.9467	1.9707
Odd_rep1_napD_p7	0.1344	0.1207	0.1174	0.1221	0.2041	0.6144	0.8962	1.3036	1.3633	1.4286	1.4881	1.5513	1.5995	1.6359	1.6765	1.7087	1.7481	1.7752	1.8159	1.838	1.8659	1.8835	1.9166	1.9272	1.9503
Odd_rep1_pcnB_p7	0.1103	0.0965	0.0942	0.0965	0.1474	0.3271	0.9401	1.2227	1.439	1.5298	1.5891	1.6782	1.7459	1.8093	1.8569	1.882	1.9101	1.9381	1.9564	1.964	1.9763	1.982	2.0102	2.018	2.0358
Odd_rep1_aroK_p7	0.1221	0.1116	0.1094	0.1112	0.1338	0.5156	0.963	1.238	1.4245	1.491	1.6012	1.6852	1.7746	1.8276	1.8526	1.897	1.9223	1.9601	1.9819	2.0091	2.0347	2.0431	2.0613	2.0593	2.0825
Odd_rep1_ynfD_p7	0.1158	0.1029	0.1001	0.104	0.156	0.5704	0.7943	1.3753	1.4335	1.4946	1.5403	1.5901	1.6379	1.6891	1.722	1.7496	1.7749	1.7983	1.8254	1.8459	1.8722	1.8926	1.9056	1.923	1.935
Odd_rep1_lacA_p7	0.1314	0.1183	0.116	0.1195	0.1925	0.3592	0.6324	0.9899	1.0051	1.0946	1.2536	1.334	1.3976	1.4679	1.5346	1.5707	1.6202	1.6619	1.7004	1.7321	1.7615	1.7857	1.8091	1.8271	1.8456
Odd_rep1_nikB_p7	0.1109	0.0964	0.0947	0.0977	0.1375	0.3211	0.4753	0.662	0.7777	0.8516	1.0306	0.9844	1.0676	1.2242	1.3601	1.4539	1.5502	1.5946	1.6488	1.6875	1.7249	1.772	1.8249	1.8405	1.8591
Odd_rep1_guaD_p7	0.1076	0.0954	0.0927	0.0948	0.1306	0.3277	0.7419	1.111	1.2847	1.3998	1.4739	1.5236	1.5791	1.6177	1.6292	1.6347	1.6497	1.6743	1.7056	1.7361	1.7707	1.7999	1.8268	1.8482	1.8712
Odd_rep1_SL1354_p7	0.0994	0.0884	0.0857	0.0849	0.0873	0.1107	0.2466	0.5733	0.6143	0.7465	0.7001	0.8239	1.0079	1.1219	1.2877	1.3405	1.3986	1.469	1.5314	1.614	1.6555	1.7141	1.7295	1.7727	1.7847
Odd_rep1_SL702_p7	0.0984	0.0867	0.0843	0.0835	0.0863	0.1094	0.6703	1.045	1.2619	1.3967	1.5089	1.5583	1.7479	1.8814	1.9335	1.9732	2.0072	1.9892	2.0318	2.0386	2.0356	2.006	2.0193	2.0318	2.0039
Odd_rep1_BW_p7	0.1005	0.0883	0.0858	0.0869	0.1076	0.2531	0.4713	0.6207	0.7733	0.8893	0.9919	1.0544	1.1342	1.1914	1.2276	1.253	1.2753	1.3215	1.3736	1.4263	1.4825	1.5374	1.5894	1.6313	1.6661
Odd_rep1_MG_p7	0.1052	0.0939	0.0915	0.0938	0.1314	0.2634	0.4008	0.49	0.5677	0.6196	0.6683	0.7061	0.7524	0.8597	0.9457	1.0359	1.125	1.3462	1.3348	1.4325	1.5204	1.5809	1.642	1.6827	1.7333
Odd_rep1_Triclosan_resistant_BW_p7	0.102	0.0898	0.0868	0.0858	0.0852	0.0871	0.1322	0.4908	0.7088	0.83	0.9414	1.0696	1.1038	1.208	1.1975	1.3488	1.3752	1.4501	1.5141	1.5807	1.6504	1.7128	1.7204	1.7516	1.8169
Odd_rep1_zntA0.5_p15	0.0895	0.0931	0.0978	0.098	0.0981	0.0989	0.0988	0.0999	0.0998	0.0999	0.1002	0.1008	0.1005	0.1001	0.1005	0.1007	0.1	0.0994	0.0989	0.0963	0.0957	0.0961	0.097	0.0976	0.0975
Odd_rep1_yhip0.5_p15	0.0909	0.0893	0.0913	0.0904	0.0907	0.0908	0.0909	0.0903	0.0906	0.0903	0.0897	0.0892	0.0893	0.0892	0.0901	0.0901	0.0896	0.0898	0.0891	0.0882	0.0879	0.0889	0.0895	0.0897	0.0901
Odd_rep1_phnP0.5_p15	0.0894	0.0869	0.0866	0.0863	0.0864	0.0866	0.0866	0.0875	0.0876	0.0877	0.0874	0.088	0.0878	0.0873	0.087	0.0869	0.0864	0.0869	0.0865	0.0862	0.0863	0.0862	0.0863	0.0862	0.0863
Odd_rep1_uhpT0.5_p15	0.082	0.0813	0.0813	0.0808	0.0819	0.0813	0.0815	0.0816	0.0819	0.0816	0.0827	0.0825	0.0821	0.0821	0.0818	0.0824	0.082	0.0824	0.0821	0.0822	0.0819	0.0818	0.0819	0.0825	0.082
Odd_rep1_cutC0.5_p15	0.0856	0.0844	0.0845	0.0851	0.0846	0.0846	0.0849	0.0852	0.0852	0.085	0.0856	0.0858	0.0856	0.0858	0.0857	0.0858	0.086	0.0867	0.0862	0.0861	0.0858	0.0861	0.086	0.0866	0.0868
Odd_rep1_cstA0.5_p15	0.0911	0.0894	0.09	0.0916	0.0909	0.0905	0.0908	0.0914	0.0916	0.0923	0.0925	0.0926	0.0927	0.0929	0.0932	0.0936	0.0933	0.0938	0.0939	0.094	0.094	0.0938	0.0941	0.0939	0.0942
Odd_rep1_yjjQ0.5_p15	0.083	0.0809	0.0803	0.0808	0.0803	0.0807	0.0808	0.0816	0.082	0.0819	0.0819	0.0827	0.0826	0.0823	0.0825	0.0828	0.0824	0.0832	0.0826	0.0826	0.0826	0.0825	0.0825	0.0823	0.0815
Odd_rep1_yjgL0.5_p15	0.0927	0.0904	0.0906	0.0905	0.0905	0.0909	0.0912	0.0916	0.0915	0.0921	0.0918	0.0914	0.0915	0.091	0.0909	0.091	0.0904	0.0909	0.0903	0.0891	0.0893	0.0897	0.089	0.0891	0.0892
Odd_rep1_glpT0.5_p15	0.0967	0.0994	0.0991	0.1006	0.1006	0.0986	0.0982	0.0979	0.098	0.0975	0.0989	0.0961	0.0973	0.098	0.098	0.0986	0.0984	0.0985	0.0987	0.0977	0.0974	0.0981	0.0985	0.1	0.1004
Odd_rep1_mcrC0.5_p15	0.082	0.0814	0.0814	0.0822	0.0822	0.0823	0.0829	0.0837	0.0812	0.0803	0.0799	0.0809	0.0809	0.0808	0.0807	0.0815	0.0816	0.0824	0.0822	0.0822	0.0822	0.0819	0.0824	0.0832	0.0833
OddandEven_rep1_BW10.5_p15	0.1003	0.0976	0.0983	0.0979	0.0978	0.0974	0.0984	0.0982	0.0999	0.0994	0.0997	0.1	0.0997	0.0996	0.0989	0.0991	0.0988	0.0987	0.0983	0.0989	0.0988	0.0987	0.0996	0.0989	0.0988
OddandEven_rep1_BW20.5_p15	0.1045	0.1028	0.1043	0.1033	0.1038	0.1029	0.1027	0.1023	0.1049	0.1049	0.1059	0.1062	0.1064	0.1063	0.1061	0.1056	0.1052	0.106	0.1054	0.1054	0.1052	0.1052	0.1052	0.1057	0.1058
OddandEven_rep1_BW30.5_p15	0.0875	0.0869	0.0876	0.0875	0.0878	0.0873	0.0875	0.087	0.0879	0.0871	0.0886	0.0901	0.0908	0.091	0.0907	0.0906	0.0901	0.0905	0.0908	0.0898	0.0894	0.0897	0.0895	0.0907	0.0902
OddandEven_rep1_Triclosan_resistant_BW0.5_p15	0.0896	0.0878	0.0878	0.0878	0.0884	0.0903	0.094	0.0994	0.109	0.1331	0.1715	0.2563	0.4475	0.7145	0.8422	0.9665	1.0785	1.2221	1.3435	1.4313	1.5177	1.5761	1.651	1.7117	1.7652
Odd_rep1_zntA0.125_p15	0.0915	0.089	0.0886	0.0902	0.0914	0.0897	0.0902	0.0934	0.1039	0.1275	0.4359	0.7839	1.1831	1.3406	1.4531	1.5456	1.6668	1.7655	1.8516	1.9381	2.0137	2.0791	2.1335	2.1715	2.204
Odd_rep1_yhip0.125_p15	0.0814	0.0809	0.0807	0.0806	0.0808	0.0817	0.0842	0.0821	0.0817	0.0816	0.085	0.1051	0.1977	0.3859	0.3993	0.4433	0.6592	0.8859	1.2037	1.4412	1.597	1.7193	1.8342	1.898	1.927
Odd_rep1_phnP0.125_p15	0.0869	0.0868	0.0858	0.0856	0.0855	0.0871	0.0878	0.0884	0.0958	0.1662	0.3138	0.613	0.8352	0.965	1.1549	1.432	1.4686	1.537	1.6231	1.7246	1.8081	1.879	1.9002	1.9468	1.9581
Odd_rep1_uhpT0.125_p15	0.081	0.0816	0.08	0.0799	0.0814	0.0816	0.0815	0.0819	0.0885	0.1337	0.6334	1.0139	1.2028	1.3042	1.3999	1.5076	1.6085	1.7016	1.7268	1.7519	1.7788	1.8162	1.8392	1.8539	1.8608
Odd_rep1_cutC0.125_p15	0.0901	0.0921	0.091	0.0912	0.0915	0.0935	0.1177	0.4034	0.7374	1.0326	1.3424	1.5028	1.5482	1.6274	1.7272	1.7946	1.8657	1.9329	2.0074	2.0725	2.1086	2.1496	2.1603	2.1688	2.163
Odd_rep1_cstA0.125_p15	0.0884	0.0894	0.0882	0.0883	0.0895	0.0879	0.0883	0.0884	0.0889	0.0884	0.0888	0.089	0.089	0.0884	0.089	0.0901	0.0904	0.0923	0.1088	0.3051	0.3027	0.3136	0.4932	0.8126	1.0495
Odd_rep1_yjjQ0.125_p15	0.0849	0.0851	0.0839	0.0837	0.0834	0.0835	0.0843	0.0848	0.0855	0.0846	0.0854	0.0865	0.0953	0.1302	0.2251	0.3909	0.5698	0.7311	0.9363	1.1692	1.2837	1.3655	1.4047	1.4343	1.4638
Odd_rep1_yjgL0.125_p15	0.0889	0.0882	0.089	0.1283	0.0893	0.0897	0.0895	0.09	0.1684	0.4522	0.6473	0.9827	1.1633	1.3437	1.5116	1.5922	1.6572	1.7527	1.8315	1.8865	1.9473	1.9849	2.0008	2.0124	2.0387
Odd_rep1_glpT0.125_p15	0.0837	0.0843	0.0839	0.0839	0.0833	0.0852	0.0954	0.1844	0.5328	0.7075	0.9349	1.1017	1.2728	1.465	1.6196	1.7504	1.8499	1.9436	2.0261	2.0785	2.0896	2.1157	2.1294	2.1408	2.1298
Odd_rep1_mcrC0.125_p15	0.0815	0.0812	0.0809	0.0815	0.0816	0.0825	0.0836	0.087	0.1245	0.5131	0.7454	0.9755	1.183	1.4508	1.5051	1.604	1.69	1.7728	1.8487	1.9405	2.0031	2.0641	2.1052	2.1291	2.1516
OddandEven_rep1_BW10.125_p15	0.0997	0.0993	0.0988	0.1011	0.1012	0.1018	0.1022	0.103	0.1055	0.2195	0.4972	0.7177	1.0341	1.1623	1.2638	1.3662	1.4294	1.4815	1.5703	1.6242	1.6698	1.7091	1.768	1.8008	1.8041
OddandEven_rep1_BW20.125_p15	0.1027	0.1029	0.1024	0.1035	0.1049	0.1056	0.1059	0.1064	0.107	0.1064	0.1068	0.1088	0.1118	0.1173	0.1376	0.174	0.2641	0.4238	0.5962	0.7963	0.9537	1.0623	1.1815	1.239	1.2391
OddandEven_rep1_BW30.125_p15	0.1029	0.1052	0.1043	0.1036	0.1057	0.1042	0.1041	0.1044	0.1047	0.104	0.1045	0.1044	0.1086	0.1999	0.5392	0.7564	0.9989	1.1387	1.2482	1.2991	1.33	1.3276	1.4091	1.4693	1.5101
OddandEven_rep1_Triclosan_resistant_BW0.125_p15	0.0845	0.083	0.0825	0.0824	0.084	0.0854	0.121	0.4062	0.8138	1.163	1.3494	1.4719	1.5432	1.5839	1.6425	1.6834	1.7217	1.7528	1.7875	1.8206	1.8485	1.8914	1.9074	1.9397	1.9574
Odd_rep1_zntA0.015_p15	0.0886	0.0891	0.0901	0.099	0.2476	0.9584	1.2403	1.4124	1.4687	1.534	1.6074	1.6761	1.7601	1.8486	1.9269	1.9893	2.04	2.0622	2.083	2.094	2.0924	2.0983	2.0988	2.1005	2.0945
Odd_rep1_yhip0.015_p15	0.1036	0.1026	0.1035	0.1107	0.1726	0.5042	0.7301	0.993	1.1824	1.3557	1.5066	1.6419	1.7121	1.7776	1.7928	1.8219	1.8521	1.8756	1.888	1.896	1.898	1.9107	1.9201	1.9329	1.9285
Odd_rep1_phnP0.015_p15	0.0893	0.0896	0.091	0.102	0.2259	0.9802	1.2312	1.3702	1.4551	1.5489	1.6384	1.7239	1.7767	1.8215	1.8504	1.878	1.8922	1.9103	1.9223	1.928	1.9281	1.9433	1.9467	1.9497	1.944
Odd_rep1_uhpT0.015_p15	0.0972	0.0983	0.0977	0.1111	0.4056	1.0104	1.1376	1.3102	1.4167	1.5399	1.6466	1.752	1.799	1.8429	1.8757	1.9089	1.9217	1.9797	2.0305	2.0599	2.0621	2.0809	2.0894	2.0937	2.0799
Odd_rep1_cutC0.015_p15	0.0839	0.0858	0.0857	0.0955	0.1643	0.3854	0.7188	1.003	1.161	1.3202	1.4574	1.567	1.6679	1.7523	1.8227	1.8713	1.8987	1.9311	1.9382	1.9559	1.9616	1.9746	1.9812	1.9883	1.9812
Odd_rep1_cstA0.015_p15	0.0818	0.0837	0.0838	0.0957	0.1637	0.7923	1.0262	1.1595	1.3128	1.438	1.5871	1.6368	1.7077	1.7583	1.7843	1.8127	1.8303	1.8556	1.8723	1.8829	1.8932	1.9108	1.9158	1.9222	1.9233
Odd_rep1_yjjQ0.015_p15	0.0931	0.0942	0.0941	0.099	0.1533	0.7904	1.1427	1.3396	1.4138	1.4554	1.5224	1.587	1.646	1.7073	1.7355	1.7657	1.7815	1.8069	1.8181	1.8273	1.8389	1.8564	1.858	1.8653	1.8633
Odd_rep1_yjgL0.015_p15	0.0908	0.0919	0.0932	0.1042	0.2274	0.8367	1.0677	1.2156	1.3498	1.4768	1.5883	1.6881	1.7471	1.8042	1.8196	1.8502	1.8699	1.891	1.9007	1.9074	1.9139	1.9406	1.9385	1.9481	1.9447
Odd_rep1_glpT0.015_p15	0.0805	0.0806	0.0815	0.0935	0.2941	0.8194	1.1615	1.3234	1.3772	1.4812	1.5783	1.6698	1.7473	1.8022	1.8321	1.8662	1.889	1.9134	1.9216	1.9323	1.9412	1.9597	1.9642	1.9679	1.9665
Odd_rep1_mcrC0.015_p15	0.081	0.0804	0.0817	0.0915	0.3414	0.8681	1.1405	1.3516	1.4488	1.546	1.6239	1.6947	1.7729	1.8227	1.8471	1.8707	1.8809	1.9055	1.9118	1.9194	1.9297	1.9406	1.9477	1.9527	1.9564
OddandEven_rep1_BW10.015_p15	0.0828	0.083	0.0848	0.0986	0.4168	0.9155	1.1813	1.3462	1.4323	1.4892	1.5521	1.6169	1.6529	1.7144	1.746	1.7702	1.7996	1.8277	1.8327	1.8364	1.8406	1.8515	1.8481	1.8528	1.8505
OddandEven_rep1_BW20.015_p15	0.0828	0.0831	0.084	0.0978	0.4516	0.9387	1.1919	1.3284	1.4353	1.5027	1.5748	1.6351	1.6922	1.7457	1.7782	1.8106	1.8377	1.8727	1.8723	1.8774	1.8741	1.8852	1.8828	1.8815	1.8763
OddandEven_rep1_BW30.015_p15	0.077	0.0769	0.078	0.0944	0.5179	1.0804	1.3165	1.4107	1.4993	1.5622	1.6164	1.6692	1.7076	1.7592	1.7858	1.8079	1.8228	1.8439	1.8716	1.8856	1.8734	1.8875	1.8852	1.8843	1.8791
OddandEven_rep1_Triclosan_resistant_BW0.015_p15	0.0836	0.0823	0.0837	0.0917	0.1742	0.9638	1.1926	1.2909	1.3919	1.4637	1.5362	1.6042	1.6352	1.6867	1.6918	1.7047	1.7188	1.7454	1.7527	1.7694	1.7871	1.8223	1.8205	1.8236	1.8244
Odd_rep1_zntA_p15	0.0872	0.0892	0.0914	0.1117	0.3888	1.0151	1.2393	1.3991	1.4606	1.5279	1.5979	1.6548	1.7073	1.7559	1.7878	1.8053	1.8198	1.8263	1.8358	1.8495	1.8577	1.8739	1.8792	1.8867	1.8867
Odd_rep1_yhip_p15	0.0842	0.0847	0.086	0.095	0.1614	0.5117	0.691	0.9126	1.1539	1.3473	1.5052	1.6096	1.6863	1.7593	1.7971	1.8112	1.8269	1.8433	1.8621	1.8722	1.8792	1.9015	1.9083	1.9223	1.9192
Odd_rep1_phnP_p15	0.0823	0.083	0.0846	0.0957	0.1837	0.8747	1.171	1.2898	1.3994	1.5113	1.6325	1.6915	1.7385	1.783	1.8107	1.8348	1.8587	1.872	1.8798	1.8861	1.8893	1.9086	1.9123	1.9188	1.9149
Odd_rep1_uhpT_p15	0.0831	0.0817	0.0834	0.0946	0.2778	0.9234	1.0991	1.2322	1.3578	1.5116	1.6402	1.7029	1.7586	1.8013	1.8429	1.8676	1.8872	1.903	1.9142	1.9222	1.9264	1.9377	1.9481	1.953	1.9456
Odd_rep1_cutC_p15	0.0828	0.0847	0.0854	0.0929	0.1324	0.2949	0.8071	1.0013	1.1636	1.3402	1.4688	1.5827	1.6721	1.7353	1.7752	1.809	1.8365	1.8576	1.8777	1.8952	1.905	1.9259	1.9353	1.942	1.9505
Odd_rep1_cstA_p15	0.0864	0.087	0.0881	0.0964	0.1588	0.7273	1.0849	1.2363	1.3606	1.48	1.578	1.6475	1.697	1.74	1.7888	1.8026	1.8274	1.8474	1.8672	1.8845	1.8926	1.9213	1.9295	1.9325	1.9351
Odd_rep1_yjjQ_p15	0.0804	0.0803	0.0813	0.0868	0.1504	0.7395	1.1576	1.3076	1.3885	1.4619	1.5391	1.6168	1.6902	1.7459	1.776	1.7969	1.8122	1.8319	1.8459	1.8581	1.8688	1.8897	1.891	1.9007	1.9009
Odd_rep1_yjgL_p15	0.0817	0.0818	0.0833	0.093	0.172	0.6017	0.999	1.1743	1.3172	1.4656	1.5931	1.7117	1.8014	1.8743	1.9197	1.9547	1.9648	1.9676	1.9909	1.9952	1.9993	2.026	2.0335	2.0369	2.0362
Odd_rep1_glpT_p15	0.0827	0.0824	0.0841	0.0933	0.2192	0.7898	1.1196	1.238	1.364	1.4729	1.5639	1.6614	1.7424	1.8099	1.853	1.8878	1.913	1.9365	1.9511	1.9707	1.98	2.0029	2.0151	2.0162	2.0135
Odd_rep1_mcrC_p15	0.0817	0.0797	0.0823	0.0914	0.2389	0.7226	1.1277	1.3118	1.416	1.5092	1.5919	1.6693	1.7534	1.8333	1.8734	1.9065	1.9288	1.9561	1.9684	1.9808	1.9818	2.0001	2.0084	2.0109	2.0115
OddandEven_rep1_BW1_p15	0.0766	0.0786	0.0788	0.0871	0.2674	0.9414	1.2082	1.3521	1.4449	1.5108	1.56	1.6064	1.6478	1.7087	1.728	1.7536	1.7729	1.8	1.8126	1.82	1.8211	1.8373	1.8434	1.8433	1.8402
OddandEven_rep1_BW2_p15	0.0815	0.0829	0.0839	0.0966	0.3318	1.0219	1.2661	1.3919	1.484	1.5531	1.6197	1.6699	1.7147	1.778	1.8122	1.838	1.8514	1.8703	1.8725	1.8846	1.8893	1.9014	1.9067	1.9093	1.9075
OddandEven_rep1_BW3_p15	0.0792	0.0808	0.0813	0.0926	0.3409	1.036	1.2916	1.4054	1.49	1.5548	1.6123	1.6631	1.7031	1.7546	1.7964	1.8326	1.8507	1.8704	1.8821	1.8916	1.8985	1.9077	1.9132	1.9186	1.9132
OddandEven_rep1_Triclosan_resistant_BW_p15	0.0813	0.0844	0.0858	0.0955	0.1961	0.9672	1.2633	1.3993	1.4967	1.5596	1.6195	1.6784	1.7142	1.7581	1.7865	1.8224	1.8451	1.8702	1.8648	1.8972	1.8989	1.9126	1.919	1.923	1.9276
Even_rep1_soxR0.5_p4	0.1137	0.1111	0.109	0.1067	0.1057	0.1049	0.1057	0.1063	0.1065	0.1067	0.1061	0.1062	0.1059	0.1053	0.1056	0.1058	0.1054	0.1053	0.1053	0.1047	0.1033	0.1013	0.0981	0.0967	0.0946
Even_rep1_fadR0.5_p4	0.114	0.1038	0.1019	0.0995	0.0983	0.0975	0.0979	0.0981	0.0984	0.0984	0.0975	0.0977	0.0969	0.0968	0.0967	0.097	0.0966	0.0955	0.0957	0.0956	0.0944	0.0929	0.0911	0.09	0.0892
Even_rep1_frdD0.5_p4	0.1147	0.1009	0.099	0.0969	0.0957	0.0947	0.0939	0.0945	0.0946	0.0937	0.0931	0.0924	0.0919	0.0922	0.0918	0.0914	0.0914	0.0912	0.0902	0.0906	0.0905	0.09	0.0897	0.0898	0.0896
Even_rep1_nuoG0.5_p4	0.1062	0.0926	0.0903	0.0892	0.0883	0.0879	0.0865	0.0865	0.0863	0.0861	0.0857	0.0855	0.085	0.0852	0.0848	0.0852	0.0848	0.0843	0.0841	0.0843	0.0836	0.0836	0.0842	0.0842	0.0836
Even_rep1_rbsB0.5_p4	0.1086	0.0956	0.0933	0.0917	0.0901	0.09	0.089	0.0892	0.0887	0.0882	0.0883	0.0876	0.0876	0.0875	0.087	0.0872	0.0871	0.0862	0.0865	0.0863	0.0857	0.0855	0.0858	0.086	0.0854
Even_rep1_ompF0.5_p4	0.1047	0.0911	0.0897	0.0878	0.0867	0.0863	0.0848	0.0854	0.0855	0.0849	0.0841	0.0837	0.084	0.0837	0.0835	0.0832	0.0832	0.0831	0.0825	0.0824	0.0825	0.0822	0.0822	0.0821	0.0819
Even_rep1_fadL0.5_p4	0.105	0.0917	0.09	0.0876	0.0865	0.086	0.0848	0.0851	0.085	0.0843	0.0841	0.0836	0.083	0.0831	0.0828	0.0828	0.0826	0.0821	0.0818	0.0815	0.0819	0.0816	0.081	0.0812	0.0809
Even_rep1_lon0.5_p4	0.1055	0.0929	0.0909	0.089	0.0881	0.0872	0.0864	0.0864	0.0865	0.0859	0.0856	0.0854	0.0854	0.0849	0.0846	0.0844	0.0844	0.0836	0.0838	0.084	0.0831	0.0831	0.083	0.0833	0.0831
Even_rep1_prc0.5_p4	0.1044	0.0921	0.0899	0.0885	0.0875	0.0872	0.0861	0.0859	0.0859	0.0855	0.0851	0.0848	0.0848	0.0845	0.0842	0.0841	0.0841	0.0838	0.0834	0.0835	0.0828	0.0827	0.083	0.0834	0.0834
Even_rep1_mrcA0.5_p4	0.1021	0.0899	0.0874	0.0862	0.0851	0.0848	0.0837	0.0837	0.0836	0.0831	0.0832	0.0829	0.0828	0.0823	0.0819	0.0825	0.082	0.0816	0.0812	0.0814	0.0808	0.0809	0.0813	0.0812	0.081
Even_rep1_yehK0.5_p4	0.105	0.0917	0.09	0.0879	0.0867	0.0864	0.0851	0.0851	0.0848	0.0843	0.0842	0.0843	0.0837	0.0837	0.0836	0.0833	0.083	0.0826	0.0825	0.0827	0.0821	0.082	0.0819	0.0822	0.0816
Even_rep1_ybfQ0.5_p4	0.1009	0.0877	0.0856	0.0838	0.0832	0.0822	0.0816	0.0813	0.0812	0.0809	0.0807	0.0804	0.0802	0.0801	0.0797	0.0798	0.0796	0.079	0.0792	0.0789	0.0783	0.0786	0.0782	0.0786	0.0786
Even_rep1_truD0.5_p4	0.112	0.0984	0.0967	0.0951	0.094	0.0935	0.0928	0.0943	0.0927	0.0931	0.0959	0.0958	0.0947	0.096	0.0922	0.0936	0.0957	0.0937	0.0939	0.0941	0.0942	0.0922	0.0896	0.0887	0.0884
Even_rep1_mprA0.5_p4	0.1085	0.0949	0.0928	0.0916	0.0902	0.0899	0.0891	0.0896	0.0894	0.0893	0.0889	0.089	0.0886	0.0877	0.0877	0.0878	0.0878	0.0871	0.0864	0.0865	0.0861	0.0856	0.0856	0.0851	0.0848
Even_rep1_ubiF0.5_p4	0.105	0.092	0.0896	0.0884	0.0878	0.087	0.0863	0.0868	0.0866	0.0863	0.0861	0.0863	0.0859	0.0855	0.0855	0.085	0.0851	0.0841	0.084	0.0837	0.0834	0.0826	0.0825	0.0827	0.0821
Even_rep1_ybeX0.5_p4	0.1033	0.0916	0.0898	0.0888	0.0876	0.0873	0.087	0.0872	0.0871	0.0869	0.0863	0.0864	0.0864	0.0854	0.0858	0.0858	0.0854	0.0848	0.0847	0.0842	0.0838	0.0831	0.0831	0.0832	0.0824
Even_rep1_rep0.5_p4	0.1036	0.091	0.0888	0.088	0.0868	0.0865	0.0856	0.0859	0.0859	0.0855	0.0858	0.0854	0.0849	0.0847	0.0845	0.0845	0.0842	0.0836	0.0837	0.083	0.0827	0.0822	0.0823	0.0819	0.0819
Even_rep1_fadD0.5_p4	0.1019	0.0913	0.0887	0.088	0.0868	0.0864	0.0856	0.0859	0.086	0.0857	0.0858	0.0853	0.0845	0.0848	0.084	0.0848	0.0841	0.0838	0.0833	0.0832	0.0825	0.0821	0.0824	0.0826	0.0823
Even_rep1_ydjO0.5_p4	0.1037	0.0914	0.0891	0.088	0.0868	0.0867	0.086	0.0865	0.0863	0.0862	0.086	0.0854	0.0853	0.0849	0.0846	0.0849	0.0845	0.0842	0.0838	0.0839	0.0831	0.0828	0.0823	0.0827	0.082
Even_rep1_yedN0.5_p4	0.1092	0.0966	0.094	0.093	0.0924	0.0917	0.0902	0.0913	0.0907	0.0908	0.0908	0.0899	0.0898	0.0893	0.0892	0.0894	0.089	0.0888	0.088	0.0877	0.0875	0.0869	0.0866	0.0866	0.0861
Even_rep1_yhbJ0.5_p4	0.1098	0.0965	0.0942	0.0928	0.0913	0.091	0.0897	0.0902	0.09	0.0896	0.089	0.0891	0.0887	0.0886	0.0878	0.0884	0.0875	0.0871	0.0868	0.0865	0.086	0.0858	0.0851	0.0857	0.085
Even_rep1_BW0.5_p4	0.1062	0.0935	0.0915	0.09	0.0891	0.0883	0.0877	0.0882	0.0877	0.0875	0.0869	0.0871	0.0863	0.0862	0.0861	0.0864	0.0859	0.0857	0.0853	0.0849	0.0844	0.0842	0.0841	0.0841	0.084
Even_rep1_MG0.5_p4	0.1034	0.0909	0.0882	0.0871	0.0863	0.0853	0.0845	0.0849	0.0847	0.0846	0.0842	0.0838	0.0837	0.0834	0.083	0.0834	0.0828	0.0825	0.0821	0.0821	0.0815	0.0812	0.0814	0.0812	0.081
Even_rep1_Tric-resistant0.5_p4	0.1044	0.0916	0.0891	0.0883	0.0875	0.0882	0.0898	0.0934	0.0989	0.1088	0.1412	0.1885	0.2905	0.4312	0.8119	1.1059	1.2928	1.4345	1.5225	1.6075	1.6823	1.7094	1.7722	1.8084	1.8537
Even_rep1_soxR0.125_p4	0.1561	0.1443	0.1426	0.1413	0.1408	0.1401	0.1393	0.1404	0.1461	0.1474	0.1589	0.2211	0.3542	0.6605	1.0959	1.324	1.4709	1.5773	1.6627	1.7282	1.7819	1.8303	1.8745	1.9205	1.9611
Even_rep1_fadR0.125_p4	0.1045	0.0918	0.0898	0.0887	0.0878	0.0875	0.087	0.087	0.0888	0.0924	0.1026	0.1294	0.1858	0.2548	0.3582	0.5473	0.7738	0.9283	1.1062	1.212	1.2691	1.3708	1.4539	1.5205	1.5761
Even_rep1_frdD0.125_p4	0.1097	0.0972	0.0957	0.0943	0.0929	0.093	0.0923	0.0922	0.0923	0.0921	0.0928	0.0922	0.0915	0.0911	0.0909	0.0908	0.0912	0.0905	0.0916	0.0903	0.0894	0.0886	0.088	0.0873	0.087
Even_rep1_nuoG0.125_p4	0.1033	0.0919	0.0897	0.0888	0.0878	0.0878	0.0874	0.0873	0.0872	0.0871	0.0871	0.087	0.0867	0.0869	0.0867	0.0862	0.0864	0.0864	0.0863	0.0856	0.0848	0.0838	0.0834	0.0831	0.0825
Even_rep1_rbsB0.125_p4	0.1	0.0885	0.0868	0.0857	0.0846	0.0848	0.0842	0.0844	0.0841	0.0838	0.0842	0.0838	0.0834	0.0841	0.0829	0.0845	0.134	0.828	1.1302	1.327	1.438	1.523	1.6243	1.6885	1.7448
Even_rep1_ompF0.125_p4	0.0983	0.087	0.085	0.084	0.0828	0.0827	0.0822	0.0821	0.0823	0.0816	0.0821	0.0821	0.0852	0.1492	0.3154	0.5314	0.7679	1.1189	1.3778	1.5451	1.6383	1.6989	1.7492	1.7981	1.8525
Even_rep1_fadL0.125_p4	0.1006	0.0886	0.0878	0.0864	0.085	0.0856	0.0851	0.0881	0.0962	0.1314	0.2178	0.3307	0.4602	0.6644	0.9419	1.201	1.3639	1.4806	1.5539	1.6163	1.6653	1.7235	1.7789	1.8447	1.894
Even_rep1_lon0.125_p4	0.1001	0.0891	0.0874	0.0861	0.0849	0.0851	0.0874	0.0923	0.112	0.1539	0.2952	0.4562	0.7807	1.105	1.3127	1.4379	1.5607	1.6797	1.7718	1.8229	1.8708	1.8987	1.9277	1.9562	1.9714
Even_rep1_prc0.125_p4	0.1006	0.0892	0.0874	0.0861	0.0852	0.0852	0.0853	0.0873	0.0921	0.1374	0.3062	0.4669	0.6579	0.7623	1.0814	1.3572	1.5867	1.6954	1.7554	1.821	1.8926	1.9492	1.9948	2.0379	2.0636
Even_rep1_mrcA0.125_p4	0.097	0.0857	0.0838	0.0825	0.0815	0.0809	0.0809	0.0805	0.0801	0.0801	0.0799	0.0794	0.0793	0.0793	0.0793	0.0786	0.0794	0.0791	0.0911	0.1478	0.2504	0.3946	0.6758	0.894	0.9939
Even_rep1_yehK0.125_p4	0.1013	0.0887	0.0868	0.0854	0.0842	0.0842	0.0833	0.09	0.1179	0.1747	0.3053	0.4914	0.7333	1.1248	1.3383	1.4789	1.5781	1.6588	1.7186	1.7806	1.8295	1.8706	1.9148	1.956	1.9879
Even_rep1_ybfQ0.125_p4	0.0998	0.0873	0.0846	0.0838	0.0828	0.0824	0.0817	0.0812	0.0814	0.0804	0.0811	0.0801	0.0799	0.08	0.0798	0.0797	0.0799	0.0792	0.079	0.079	0.0787	0.0788	0.079	0.0788	0.0785
Even_rep1_truD0.125_p4	0.1045	0.0913	0.0884	0.0875	0.0865	0.0858	0.0849	0.0846	0.0843	0.0842	0.0841	0.0836	0.0835	0.0836	0.1005	0.1767	0.307	0.6068	0.9874	1.1076	1.2027	1.1883	1.3606	1.4187	1.4469
Even_rep1_mprA0.125_p4	0.1033	0.0907	0.089	0.0878	0.0866	0.0859	0.0853	0.0851	0.0849	0.0851	0.0845	0.0839	0.0839	0.0836	0.0835	0.0834	0.0833	0.083	0.0831	0.1899	0.8091	1.1059	1.2632	1.3979	1.487
Even_rep1_ubiF0.125_p4	0.1036	0.0918	0.0899	0.089	0.0878	0.0871	0.0864	0.0869	0.088	0.138	0.4082	0.6654	0.8891	0.9937	1.2455	1.3656	1.4243	1.4445	1.4944	1.5392	1.5484	1.5882	1.6254	1.6513	1.6731
Even_rep1_ybeX0.125_p4	0.1016	0.0906	0.0891	0.0885	0.0869	0.0866	0.0933	0.1835	0.2991	0.4283	0.517	0.6545	0.9272	1.0957	1.1944	1.3299	1.4362	1.5686	1.6493	1.7233	1.7514	1.7955	1.8262	1.8658	1.8909
Even_rep1_rep0.125_p4	0.1013	0.0903	0.0885	0.0876	0.0866	0.086	0.0858	0.0861	0.0865	0.0864	0.0864	0.0855	0.0869	0.1063	0.165	0.2582	0.3827	0.5429	0.7357	0.9628	1.2061	1.3862	1.5175	1.6468	1.7191
Even_rep1_fadD0.125_p4	0.1013	0.0898	0.0885	0.0875	0.0866	0.086	0.0857	0.0859	0.0862	0.0857	0.0858	0.0851	0.0847	0.0853	0.0845	0.0848	0.0844	0.0844	0.0836	0.0837	0.0828	0.0817	0.0815	0.0816	0.0812
Even_rep1_ydjO0.125_p4	0.1006	0.0891	0.0875	0.0861	0.0851	0.0848	0.0841	0.0846	0.085	0.0846	0.0845	0.0836	0.0841	0.0843	0.0842	0.0876	0.0987	0.1272	0.1789	0.2505	0.3316	0.4461	0.5805	0.7759	0.9801
Even_rep1_yedN0.125_p4	0.1043	0.0927	0.0904	0.0897	0.0883	0.0885	0.0883	0.092	0.1151	0.1871	0.311	0.453	0.8279	1.2755	1.4211	1.5378	1.6548	1.7551	1.8381	1.9159	1.9706	1.9889	2.009	2.0271	2.0367
Even_rep1_yhbJ0.125_p4	0.1034	0.0919	0.0895	0.0883	0.0878	0.0878	0.0887	0.0959	0.1265	0.2955	0.4914	0.7242	0.9835	1.2621	1.4495	1.6031	1.6772	1.7396	1.7952	1.8474	1.9207	1.961	2.0057	2.0502	2.067
Even_rep1_BW0.125_p4	0.1017	0.0899	0.0882	0.0866	0.0861	0.0853	0.0844	0.0851	0.0847	0.0844	0.0838	0.0835	0.0839	0.0831	0.083	0.0826	0.0828	0.0824	0.082	0.0819	0.0815	0.081	0.0802	0.0806	0.0803
Even_rep1_MG0.125_p4	0.1031	0.0904	0.0879	0.0867	0.0856	0.0852	0.0843	0.0844	0.0838	0.0837	0.0832	0.083	0.0825	0.0825	0.0821	0.0824	0.0824	0.0817	0.082	0.0988	0.1488	0.2306	0.3996	0.5788	0.7436
Even_rep1_Tric-resistant0.125_p4	0.1007	0.0882	0.086	0.0848	0.0842	0.0881	0.0921	0.1386	0.5588	0.7977	1.1688	1.4219	1.5848	1.6603	1.7109	1.7595	1.802	1.8406	1.8783	1.9162	1.9218	1.939	1.9539	1.9783	1.9926
Even_rep1_soxR0.015_p4	0.1046	0.0919	0.0901	0.096	0.1805	0.5585	1.1994	1.6014	1.6662	1.7197	1.7895	1.8419	1.908	1.9562	1.9668	1.9889	2.0005	2.0207	2.0296	2.0544	2.0553	2.0518	2.0716	2.0825	2.0838
Even_rep1_fadR0.015_p4	0.1053	0.0929	0.0914	0.0941	0.1292	0.6087	1.2122	1.4837	1.6116	1.6781	1.7571	1.8389	1.915	1.9742	1.9862	2.001	2.0181	2.0373	2.0452	2.062	2.0591	2.0603	2.0733	2.0853	2.0917
Even_rep1_frdD0.015_p4	0.1091	0.097	0.0956	0.0977	0.1405	0.6154	1.0271	1.2174	1.3438	1.4583	1.54	1.6152	1.7041	1.7661	1.8007	1.8321	1.8539	1.8698	1.884	1.9087	1.9163	1.9222	1.9381	1.9491	1.9574
Even_rep1_nuoG0.015_p4	0.1021	0.0921	0.0908	0.0936	0.1176	0.3617	0.6254	1.4376	1.4928	1.5259	1.5793	1.6376	1.6847	1.7063	1.7404	1.7789	1.8208	1.8828	1.9095	1.9203	1.94	1.9413	1.9689	1.9817	1.9925
Even_rep1_rbsB0.015_p4	0.0994	0.09	0.0885	0.0925	0.151	0.6895	0.999	1.5311	1.637	1.7051	1.7884	1.8568	1.9224	2.0061	1.9898	2.0116	2.0312	2.0459	2.049	2.0688	2.0753	2.074	2.0883	2.1014	2.113
Even_rep1_ompF0.015_p4	0.0981	0.0877	0.0862	0.0898	0.1265	0.5052	0.9073	1.4909	1.5538	1.6043	1.6734	1.7321	1.8109	1.8789	1.9187	1.9401	1.9567	1.9733	1.981	1.9982	2.013	2.0109	2.0246	2.0321	2.0454
Even_rep1_fadL0.015_p4	0.1024	0.1107	0.0938	0.1033	0.1774	0.4449	0.8908	1.4929	1.6297	1.6764	1.7498	1.801	1.8682	1.9171	1.9513	1.9734	1.9852	1.9974	2.0133	2.0273	2.0344	2.0316	2.0473	2.0626	2.0618
Even_rep1_lon0.015_p4	0.1023	0.0909	0.0896	0.0917	0.1168	0.354	0.999	1.4032	1.5345	1.6033	1.69	1.7593	1.8619	1.8755	1.9086	1.9344	1.9594	1.9847	1.9888	2.0129	2.0193	2.0188	2.0378	2.0424	2.0519
Even_rep1_prc0.015_p4	0.1005	0.0903	0.089	0.0926	0.131	0.3985	0.6976	1.0754	1.4503	1.5167	1.6139	1.6616	1.7257	1.8134	1.801	1.8048	1.821	1.836	1.8488	1.8667	1.8653	1.8622	1.8682	1.8786	1.8842
Even_rep1_mrcA0.015_p4	0.1027	0.0913	0.0889	0.0888	0.0924	0.1091	0.1859	0.3839	0.6278	0.9393	1.3149	1.4356	1.5392	1.6441	1.7443	1.8452	1.885	1.9317	1.9561	1.9782	1.9971	2.0026	2.0219	2.0399	2.0469
Even_rep1_yehK0.015_p4	0.1016	0.0897	0.0879	0.0888	0.1026	0.3188	0.8609	1.2956	1.6106	1.6621	1.7317	1.7861	1.8448	1.8854	1.9338	1.9556	1.9755	1.994	2.0178	2.0308	2.0322	2.0352	2.0434	2.0623	2.0669
Even_rep1_ybfQ0.015_p4	0.1021	0.0893	0.0874	0.0902	0.1357	0.3255	0.8658	1.2675	1.5319	1.6212	1.7011	1.764	1.814	1.861	1.9063	1.9283	1.9404	1.9554	1.9652	1.9747	1.9824	1.9858	1.9991	2.0174	2.023
Even_rep1_truD0.015_p4	0.1096	0.0966	0.0946	0.0963	0.1137	0.4317	0.9573	1.3752	1.5241	1.6397	1.7401	1.8246	1.8806	1.9163	1.9489	1.9746	1.9936	2.0127	2.0324	2.0395	2.0489	2.0561	2.0629	2.0819	2.0792
Even_rep1_mprA0.015_p4	0.1063	0.0949	0.0932	0.0961	0.1283	0.5278	1.0335	1.352	1.4578	1.5369	1.6237	1.7057	1.7627	1.7894	1.8197	1.8456	1.8714	1.8921	1.9104	1.9193	1.9335	1.9384	1.9466	1.9608	1.9599
Even_rep1_ubiF0.015_p4	0.1065	0.0958	0.0942	0.095	0.1079	0.2151	0.4816	0.7015	0.9762	1.1053	1.2117	1.2942	1.3736	1.4431	1.5089	1.5836	1.6384	1.6745	1.7055	1.7314	1.756	1.7665	1.788	1.8104	1.8163
Even_rep1_ybeX0.015_p4	0.1053	0.0953	0.0942	0.0962	0.1284	0.7328	1.0503	1.4213	1.6263	1.6963	1.7624	1.8159	1.8787	1.9231	1.9697	1.9878	2.0055	2.0189	2.0384	2.0509	2.0575	2.0569	2.0687	2.0867	2.0847
Even_rep1_rep0.015_p4	0.106	0.0956	0.0941	0.0956	0.1181	0.2671	0.5239	0.8214	1.2432	1.4744	1.6353	1.7462	1.8418	1.8909	1.94	1.9665	1.9971	2.0072	2.0263	2.0355	2.0421	2.0496	2.0651	2.0842	2.0814
Even_rep1_fadD0.015_p4	0.0985	0.0876	0.0867	0.0886	0.1287	0.3311	0.6409	0.9873	1.2223	1.3914	1.5207	1.605	1.6813	1.7388	1.791	1.8317	1.8725	1.8949	1.9154	1.9324	1.937	1.9426	1.9566	1.9727	1.975
Even_rep1_ydjO0.015_p4	0.1021	0.092	0.0908	0.0932	0.1277	0.3721	0.8806	1.1916	1.4309	1.5545	1.6381	1.715	1.7772	1.8366	1.8943	1.941	1.961	1.9787	1.9969	2.0094	2.017	2.0155	2.0325	2.0493	2.0495
Even_rep1_yedN0.015_p4	0.1043	0.0927	0.0914	0.0925	0.1063	0.2964	0.8045	1.0309	1.522	1.5801	1.6571	1.7275	1.7926	1.8511	1.9087	1.9367	1.9604	1.9762	1.9935	2.01	2.0163	2.0184	2.0291	2.0488	2.0558
Even_rep1_yhbJ0.015_p4	0.1023	0.0917	0.0899	0.0923	0.1204	0.8077	1.1991	1.411	1.6266	1.7094	1.7946	1.872	1.9488	1.9712	2.0008	2.0174	2.0368	2.0475	2.0615	2.0835	2.093	2.0956	2.1126	2.1403	2.1376
Even_rep1_BW0.015_p4	0.1025	0.0914	0.09	0.0938	0.1549	0.4399	0.7276	0.9588	1.1774	1.3206	1.4548	1.5441	1.6374	1.7145	1.7811	1.8222	1.8448	1.8709	1.8907	1.9117	1.9216	1.9267	1.9482	1.9726	1.9776
Even_rep1_MG0.015_p4	0.0998	0.088	0.0869	0.0911	0.1516	0.3896	0.537	0.8589	1.0641	1.1925	1.3062	1.3993	1.4944	1.5719	1.6599	1.7214	1.7567	1.7847	1.8203	1.8373	1.856	1.8719	1.8856	1.9122	1.9096
Even_rep1_Tric-resistant0.015_p4	0.0988	0.0884	0.087	0.0894	0.148	0.5947	1.0392	1.2803	1.4653	1.5635	1.6484	1.7035	1.7598	1.8001	1.8363	1.8691	1.8912	1.9148	1.9328	1.9464	1.961	1.9672	1.9914	2.0175	2.0253
Even_rep1_soxR_p4	0.1145	0.105	0.1035	0.11	0.1767	0.7826	1.1276	1.5527	1.6312	1.6972	1.7677	1.835	1.8962	1.9383	1.9569	1.9832	2.0007	2.0105	2.0313	2.0447	2.059	2.0505	2.0625	2.0835	2.09
Even_rep1_fadR_p4	0.102	0.0897	0.0882	0.0905	0.1273	0.6299	1.166	1.4637	1.5876	1.6491	1.7323	1.8081	1.8832	1.9414	1.9597	1.9841	2.0037	2.0171	2.0276	2.0433	2.053	2.0523	2.0711	2.0852	2.0901
Even_rep1_frdD_p4	0.1034	0.0917	0.0901	0.0928	0.1262	0.456	0.9903	1.2304	1.3957	1.5226	1.6042	1.6856	1.79	1.8236	1.8518	1.877	1.897	1.9079	1.9323	1.9473	1.9508	1.9588	1.9719	1.9861	1.9997
Even_rep1_nuoG_p4	0.1011	0.0897	0.0877	0.089	0.1193	0.3435	0.5967	1.3531	1.4896	1.5294	1.5931	1.6383	1.6845	1.7156	1.7562	1.7995	1.8462	1.8869	1.92	1.9429	1.9573	1.9663	1.9845	2.0011	2.0113
Even_rep1_rbsB_p4	0.103	0.0919	0.0901	0.0915	0.1278	0.7167	0.9826	1.4736	1.5981	1.682	1.7571	1.8371	1.9103	1.9552	1.9883	2.0112	2.0305	2.0415	2.0536	2.0672	2.0759	2.0747	2.0826	2.102	2.1075
Even_rep1_ompF_p4	0.1025	0.0921	0.0905	0.0935	0.1423	0.6406	0.919	1.4709	1.5484	1.6222	1.6908	1.7681	1.8424	1.9088	1.9518	1.9686	1.9922	2.0046	2.0156	2.031	2.0352	2.0422	2.0513	2.0753	2.0801
Even_rep1_fadL_p4	0.1065	0.0955	0.0937	0.0954	0.142	0.3563	0.8963	1.4347	1.6064	1.678	1.7422	1.8062	1.8646	1.9044	1.9423	1.9625	1.977	1.9864	2.0074	2.0233	2.0249	2.033	2.0438	2.0582	2.0706
Even_rep1_lon_p4	0.1043	0.093	0.091	0.0917	0.1064	0.3203	0.9208	1.2689	1.4465	1.553	1.6544	1.7446	1.8153	1.8664	1.9009	1.927	1.9463	1.9682	1.9864	2.0006	2.0107	2.014	2.0275	2.0428	2.0509
Even_rep1_prc_p4	0.1009	0.0891	0.0876	0.0889	0.1107	0.402	0.6782	1.0069	1.4077	1.4994	1.602	1.6654	1.7385	1.7746	1.8019	1.8114	1.8249	1.819	1.8316	1.8485	1.8503	1.8598	1.8753	1.8911	1.8942
Even_rep1_mrcA_p4	0.1021	0.091	0.0888	0.0897	0.1073	0.3089	0.926	1.266	1.3886	1.4935	1.5975	1.6974	1.7881	1.8257	1.8755	1.9065	1.9227	1.9427	1.9674	1.9877	1.9866	1.9943	2.0156	2.0368	2.0384
Even_rep1_yehK_p4	0.1035	0.0919	0.0901	0.0906	0.109	0.2895	0.9016	1.2302	1.5613	1.6404	1.7278	1.7927	1.857	1.8985	1.938	1.9714	1.9745	1.9867	2.0109	2.0289	2.0347	2.043	2.0545	2.0726	2.0709
Even_rep1_ybfQ_p4	0.1009	0.0893	0.087	0.0886	0.1243	0.3082	0.8368	1.2217	1.5289	1.6293	1.7185	1.7738	1.8244	1.8653	1.9071	1.9412	1.9558	1.9712	1.993	2.0009	1.9983	2.0011	2.0123	2.0284	2.0377
Even_rep1_truD_p4	0.1068	0.0953	0.093	0.0933	0.1058	0.3994	0.8224	1.2327	1.4746	1.5803	1.6787	1.7637	1.849	1.877	1.9186	1.9434	1.9712	1.9891	2.0082	2.0248	2.0327	2.0418	2.0506	2.0702	2.0739
Even_rep1_mprA_p4	0.1068	0.0949	0.0929	0.0952	0.1124	0.3022	1.0505	1.3335	1.4324	1.5138	1.593	1.6754	1.7377	1.7678	1.8041	1.8352	1.8596	1.8884	1.9131	1.9349	1.9401	1.9495	1.9586	1.9772	1.9795
Even_rep1_ubiF_p4	0.1178	0.1057	0.1042	0.1037	0.1106	0.1744	0.3551	0.5786	0.931	1.0567	1.1971	1.282	1.3698	1.4395	1.5165	1.598	1.6281	1.659	1.6974	1.7339	1.7521	1.7664	1.7881	1.8113	1.8239
Even_rep1_ybeX_p4	0.1083	0.0977	0.0957	0.0959	0.115	0.3701	1.0188	1.4294	1.6171	1.6896	1.7561	1.8188	1.8838	1.9163	1.9512	1.9722	1.9908	2.0057	2.018	2.035	2.0349	2.0501	2.0577	2.0821	2.0818
Even_rep1_rep_p4	0.1082	0.0976	0.0958	0.0967	0.1066	0.1614	0.3506	0.5373	0.954	1.2894	1.5018	1.64	1.7519	1.8114	1.8598	1.8903	1.9181	1.9255	1.9458	1.9675	1.9692	1.9849	2.0051	2.0251	2.0337
Even_rep1_fadD_p4	0.1018	0.0915	0.0896	0.0916	0.1125	0.2883	0.4311	0.9538	1.2043	1.3599	1.4926	1.5863	1.6599	1.7147	1.7684	1.8144	1.8462	1.8644	1.8811	1.8993	1.9087	1.918	1.9421	1.9671	1.9769
Even_rep1_ydjO_p4	0.1112	0.0979	0.0964	0.0971	0.114	0.3201	0.8591	1.1736	1.425	1.5181	1.613	1.6845	1.7509	1.8121	1.8643	1.9067	1.9247	1.9461	1.9584	1.9712	1.9787	1.9857	2.0015	2.0196	2.0264
Even_rep1_yedN_p4	0.1099	0.0988	0.0968	0.0967	0.1082	0.2584	0.4898	1.0097	1.495	1.6115	1.6928	1.7611	1.8074	1.8619	1.904	1.9174	1.9378	1.9524	1.9675	1.9852	1.9886	2.0016	2.0184	2.0417	2.0475
Even_rep1_yhbJ_p4	0.1001	0.0894	0.0877	0.0888	0.1035	0.4543	1.1188	1.3743	1.5281	1.6415	1.7418	1.8187	1.8923	1.9387	1.9505	1.9763	1.9887	2.008	2.0244	2.0482	2.0578	2.0649	2.084	2.1107	2.1156
Even_rep1_BW_p4	0.102	0.0911	0.0894	0.0905	0.1364	0.4297	0.6825	1.0001	1.259	1.4072	1.5386	1.6083	1.6801	1.7358	1.8071	1.8563	1.878	1.9048	1.9236	1.9503	1.96	1.9777	1.9933	2.0123	2.0201
Even_rep1_MG_p4	0.0988	0.0876	0.0859	0.0878	0.1328	0.399	0.6086	0.9362	1.1484	1.2864	1.4367	1.5422	1.6099	1.6762	1.7512	1.8109	1.8399	1.8751	1.9024	1.931	1.942	1.9574	1.9685	1.9872	1.998
Even_rep1_Tric-resistant_p4	0.1028	0.0909	0.0889	0.0909	0.1112	0.6281	0.9943	1.2509	1.4633	1.568	1.6481	1.7131	1.7728	1.8192	1.8583	1.8871	1.9136	1.9371	1.9667	1.9932	1.9932	2.008	2.0282	2.0479	2.0538
Even_rep1_yibA0.5_p5	0.1188	0.114	0.1119	0.1104	0.1098	0.1098	0.1098	0.1093	0.1086	0.1087	0.1083	0.108	0.1077	0.1076	0.1073	0.1067	0.106	0.1053	0.1051	0.1038	0.1027	0.1034	0.1034	0.1033	0.1037
Even_rep1_yjcF0.5_p5	0.1225	0.1121	0.1097	0.1093	0.1081	0.1076	0.1075	0.1075	0.1069	0.1067	0.1061	0.1063	0.1054	0.1053	0.1049	0.1044	0.1036	0.1033	0.1026	0.1018	0.1016	0.1018	0.1016	0.1018	0.102
Even_rep1_yjbI0.5_p5	0.1119	0.0996	0.0968	0.0952	0.0944	0.0937	0.0932	0.0932	0.0927	0.0922	0.0913	0.092	0.0916	0.0912	0.0906	0.09	0.0894	0.0904	0.09	0.0892	0.0889	0.0892	0.089	0.0889	0.0892
Even_rep1_yjbL0.5_p5	0.1152	0.1029	0.1	0.0985	0.0974	0.0968	0.0966	0.0962	0.0957	0.0951	0.095	0.0948	0.0943	0.0942	0.094	0.0934	0.0933	0.0932	0.0929	0.0921	0.0914	0.092	0.0918	0.0917	0.0924
Even_rep1_yigF0.5_p5	0.1049	0.0944	0.0917	0.09	0.0896	0.0889	0.0886	0.0888	0.0882	0.0876	0.0876	0.0873	0.0869	0.0869	0.0867	0.0858	0.086	0.0859	0.0861	0.0855	0.0853	0.0853	0.0855	0.0854	0.0858
Even_rep1_acrB0.5_p5	0.1074	0.0955	0.0928	0.0912	0.0902	0.09	0.0892	0.0889	0.0887	0.0884	0.0879	0.0881	0.0877	0.0874	0.0871	0.0865	0.0864	0.0865	0.0867	0.0861	0.0858	0.0862	0.0859	0.0859	0.0864
Even_rep1_aroE0.5_p5	0.1075	0.0963	0.0933	0.0917	0.0911	0.0907	0.09	0.0903	0.0893	0.0894	0.0886	0.0887	0.0885	0.0883	0.088	0.0875	0.0876	0.0872	0.0872	0.0868	0.0865	0.0867	0.0867	0.0867	0.0871
Even_rep1_aroD0.5_p5	0.1136	0.1019	0.0988	0.0969	0.096	0.0955	0.0953	0.0953	0.0946	0.0944	0.0935	0.0936	0.0935	0.093	0.093	0.0919	0.0922	0.0922	0.092	0.0912	0.091	0.0914	0.0914	0.091	0.0915
Even_rep1_aroC0.5_p5	0.1106	0.0999	0.0976	0.0958	0.0948	0.0943	0.0943	0.094	0.0935	0.0936	0.0929	0.0925	0.0923	0.0923	0.0919	0.0913	0.0909	0.0914	0.091	0.0908	0.0902	0.0907	0.0905	0.0901	0.0907
Even_rep1_fre0.5_p5	0.1078	0.0966	0.0937	0.092	0.0916	0.091	0.0905	0.0906	0.09	0.0899	0.0894	0.0891	0.0889	0.0885	0.0884	0.0879	0.0879	0.0878	0.0877	0.0872	0.0867	0.0871	0.0867	0.0868	0.0871
Even_rep1_sspA0.5_p5	0.1097	0.098	0.0947	0.0935	0.0921	0.0921	0.0919	0.0915	0.0911	0.0906	0.0901	0.0901	0.0897	0.0896	0.0891	0.0885	0.0889	0.0888	0.0887	0.0876	0.0877	0.088	0.0882	0.0877	0.0882
Even_rep1_minC0.5_p5	0.116	0.1042	0.1016	0.0997	0.0988	0.0983	0.0983	0.0977	0.0973	0.0966	0.0964	0.0968	0.0962	0.0962	0.0957	0.0949	0.0952	0.0953	0.0947	0.0945	0.0942	0.0945	0.0947	0.0946	0.0943
Even_rep1_gcvP0.5_p5	0.1063	0.0956	0.0932	0.0926	0.0917	0.0915	0.0922	0.0936	0.0911	0.0908	0.0903	0.0918	0.0925	0.0902	0.0905	0.0889	0.0882	0.0881	0.088	0.0877	0.0879	0.0884	0.0886	0.0899	0.09
Even_rep1_treC0.5_p5	0.1037	0.0928	0.0909	0.0892	0.0885	0.0882	0.0877	0.0878	0.087	0.0871	0.0867	0.0869	0.0862	0.086	0.0862	0.0854	0.0852	0.0854	0.0855	0.0846	0.0843	0.0847	0.0842	0.0847	0.0847
Even_rep1_galU0.5_p5	0.1058	0.095	0.0928	0.0913	0.0904	0.09	0.0898	0.0894	0.089	0.0891	0.0887	0.0889	0.0886	0.0884	0.0881	0.0873	0.0876	0.0876	0.0872	0.0868	0.0863	0.0868	0.0862	0.0866	0.0868
Even_rep1_carB0.5_p5	0.1041	0.0937	0.0914	0.0899	0.0898	0.0889	0.0886	0.0888	0.0887	0.088	0.0877	0.0879	0.0875	0.0874	0.0873	0.0862	0.0864	0.0859	0.0861	0.0855	0.0851	0.0853	0.0849	0.0851	0.0854
Even_rep1_purL0.5_p5	0.1066	0.0961	0.0938	0.0922	0.0916	0.091	0.0912	0.0908	0.091	0.0906	0.0902	0.0901	0.0899	0.0898	0.0895	0.0891	0.0887	0.0888	0.0887	0.0884	0.0875	0.0881	0.0879	0.0879	0.0882
Even_rep1_creA0.5_p5	0.1035	0.0934	0.0911	0.0899	0.0894	0.0889	0.0889	0.0885	0.0884	0.0881	0.0876	0.0878	0.0871	0.0869	0.0869	0.0865	0.0863	0.0862	0.0865	0.0859	0.085	0.0856	0.0854	0.0857	0.0856
Even_rep1_cyaA0.5_p5	0.1048	0.0938	0.0918	0.0905	0.0893	0.0897	0.0888	0.0887	0.0887	0.0885	0.0885	0.0879	0.0878	0.0876	0.0873	0.0867	0.0863	0.0865	0.0863	0.0857	0.0851	0.0853	0.0852	0.0854	0.0855
Even_rep1_sapD0.5_p5	0.1084	0.097	0.0943	0.0932	0.0915	0.0914	0.0911	0.0915	0.0908	0.0907	0.0906	0.0903	0.0899	0.0898	0.0897	0.089	0.0887	0.0885	0.088	0.0884	0.0873	0.0875	0.0877	0.0878	0.0877
Even_rep1_psta0.5_p5	0.1079	0.0976	0.0951	0.0936	0.0926	0.0921	0.0916	0.0916	0.0912	0.0913	0.0906	0.0905	0.0901	0.0904	0.0897	0.0891	0.0892	0.0887	0.089	0.0883	0.0881	0.0884	0.0879	0.0882	0.0884
Even_rep1_BW0.5_p5	0.108	0.0968	0.0944	0.0923	0.092	0.0917	0.0912	0.0915	0.0908	0.091	0.0905	0.0902	0.0898	0.0898	0.0893	0.0885	0.0882	0.0886	0.0881	0.0882	0.0874	0.0875	0.0876	0.0871	0.0877
Even_rep1_MG0.5_p5	0.111	0.0995	0.0969	0.095	0.0941	0.0936	0.0938	0.0929	0.0928	0.0925	0.0922	0.092	0.0918	0.0915	0.0909	0.0909	0.0907	0.0908	0.0905	0.09	0.0897	0.0899	0.0898	0.0896	0.0898
Even_rep1_Triclosan_resistant_BW0.5_p5	0.1119	0.1004	0.0978	0.0956	0.0953	0.0943	0.0942	0.0939	0.0936	0.0932	0.093	0.0935	0.1182	0.2366	0.3344	0.3555	0.3794	0.4401	0.5201	0.595	0.7203	0.8525	0.9723	1.06	1.1529
Even_rep1_yibA0.125_p5	0.118	0.1069	0.1069	0.1029	0.1022	0.1014	0.1007	0.1006	0.1003	0.0995	0.0991	0.0991	0.0987	0.0985	0.0981	0.0974	0.0976	0.0974	0.0971	0.0967	0.0963	0.0964	0.0963	0.0964	0.0965
Even_rep1_yjcF0.125_p5	0.115	0.1042	0.1021	0.1007	0.0999	0.0994	0.0994	0.0993	0.0988	0.0986	0.0978	0.0982	0.0981	0.1038	0.1833	0.2964	0.4854	0.7867	0.9828	1.0375	1.2182	1.4918	1.6282	1.6945	1.7604
Even_rep1_yjbI0.125_p5	0.1119	0.1015	0.099	0.0974	0.0972	0.0959	0.0966	0.0964	0.0963	0.0962	0.0959	0.1015	0.2039	0.3686	0.5593	0.7087	0.8	0.971	1.292	1.4959	1.5989	1.6713	1.7397	1.804	1.8716
Even_rep1_yjbL0.125_p5	0.1074	0.0976	0.0953	0.0944	0.0937	0.0936	0.0934	0.0931	0.093	0.0928	0.0921	0.0933	0.1106	0.1731	0.2584	0.388	0.5803	0.7685	0.9112	1.0067	1.0678	1.0805	1.0873	1.4534	1.6128
Even_rep1_yigF0.125_p5	0.1102	0.0993	0.0969	0.095	0.0946	0.0937	0.094	0.0933	0.0931	0.0935	0.0927	0.0931	0.0929	0.0931	0.0922	0.0917	0.0919	0.0914	0.0918	0.0911	0.0928	0.0988	0.1124	0.1383	0.1894
Even_rep1_acrB0.125_p5	0.1122	0.1013	0.0995	0.0978	0.0979	0.0971	0.0978	0.0969	0.0969	0.0969	0.0963	0.0967	0.0964	0.0964	0.0957	0.0949	0.0952	0.0948	0.095	0.0937	0.0935	0.0939	0.0938	0.0935	0.0942
Even_rep1_aroE0.125_p5	0.1052	0.0948	0.0929	0.0913	0.0911	0.0905	0.0904	0.09	0.0898	0.0898	0.0897	0.0899	0.089	0.0888	0.0885	0.088	0.0881	0.0878	0.0875	0.0866	0.0868	0.0865	0.0867	0.0868	0.0873
Even_rep1_aroD0.125_p5	0.1096	0.0978	0.0964	0.0945	0.0942	0.0937	0.0939	0.0935	0.093	0.0931	0.0924	0.0929	0.0924	0.0945	0.1062	0.1648	0.2746	0.4291	0.6088	0.7732	1.0585	1.4056	1.5402	1.6152	1.6755
Even_rep1_aroC0.125_p5	0.1048	0.0943	0.0918	0.0907	0.0902	0.0894	0.0897	0.09	0.0893	0.0898	0.0892	0.0892	0.0889	0.0905	0.1067	0.1804	0.2696	0.4087	0.5479	0.7898	1.1356	1.3136	1.4482	1.5302	1.6066
Even_rep1_fre0.125_p5	0.1064	0.0957	0.0933	0.0922	0.0918	0.0915	0.0917	0.0917	0.0975	0.1008	0.1003	0.0993	0.1169	0.1921	0.3187	0.5278	0.6943	0.8381	1.003	1.3015	1.456	1.5619	1.6372	1.6945	1.744
Even_rep1_sspA0.125_p5	0.1069	0.0967	0.0939	0.0926	0.0916	0.0911	0.091	0.0915	0.0911	0.0932	0.0965	0.1132	0.1617	0.2901	0.41	0.5108	0.7825	0.9708	1.1095	1.2105	1.3069	1.3847	1.4527	1.5163	1.5721
Even_rep1_minC0.125_p5	0.107	0.0967	0.0941	0.0919	0.0912	0.0908	0.0906	0.091	0.0899	0.0896	0.089	0.0897	0.0887	0.0888	0.0885	0.0884	0.0882	0.0882	0.0945	0.118	0.1002	0.0867	0.0868	0.0872	0.0877
Even_rep1_gcvP0.125_p5	0.1116	0.1007	0.0982	0.0967	0.0957	0.0951	0.095	0.0951	0.094	0.0942	0.0937	0.1032	0.106	0.1305	0.2136	0.3434	0.4806	0.9119	1.2823	1.452	1.5497	1.6182	1.6628	1.7165	1.7775
Even_rep1_treC0.125_p5	0.1179	0.1061	0.1037	0.1021	0.1017	0.1008	0.1004	0.1007	0.0999	0.0995	0.0993	0.0989	0.0987	0.0984	0.098	0.0975	0.0973	0.0972	0.0971	0.0957	0.096	0.0964	0.0964	0.096	0.0966
Even_rep1_galU0.125_p5	0.1121	0.1034	0.1	0.0988	0.0987	0.0973	0.0969	0.0978	0.0966	0.0966	0.0962	0.0974	0.1117	0.181	0.3387	0.6133	0.8118	0.9396	1.1352	1.4011	1.4761	1.582	1.6343	1.6906	1.7323
Even_rep1_carB0.125_p5	0.1111	0.101	0.0993	0.0983	0.0972	0.0972	0.097	0.0976	0.0964	0.0966	0.0962	0.0964	0.096	0.0962	0.0969	0.1018	0.1398	0.2069	0.2934	0.4218	0.5716	0.7635	1.0727	1.273	1.3416
Even_rep1_purL0.125_p5	0.1145	0.1039	0.1023	0.101	0.1007	0.1004	0.1002	0.1018	0.103	0.1113	0.1361	0.1981	0.3183	0.5026	0.7044	0.877	1.0245	1.1556	1.3444	1.5118	1.6149	1.6864	1.7428	1.798	1.8458
Even_rep1_creA0.125_p5	0.109	0.0993	0.0977	0.0962	0.0958	0.0954	0.0953	0.0953	0.0948	0.0948	0.0944	0.0969	0.126	0.2204	0.3679	0.5692	0.7203	1.0503	0.886	1.2497	1.4927	1.6445	1.7294	1.7951	1.8401
Even_rep1_cyaA0.125_p5	0.1077	0.0995	0.0975	0.0959	0.0953	0.0953	0.0952	0.0953	0.0947	0.0947	0.0949	0.0945	0.0942	0.0942	0.0941	0.093	0.0932	0.0934	0.1079	0.1891	0.3058	0.4995	0.7631	1.0736	1.2729
Even_rep1_sapD0.125_p5	0.1137	0.103	0.1006	0.0991	0.0987	0.0982	0.0979	0.0977	0.0986	0.1305	0.2441	0.3696	0.4813	0.5265	0.6077	0.7452	0.9647	1.1393	1.2698	1.3545	1.4269	1.5098	1.571	1.6422	1.6946
Even_rep1_psta0.125_p5	0.1103	0.1	0.0981	0.0964	0.0956	0.0954	0.0952	0.095	0.0944	0.0942	0.0944	0.0937	0.0937	0.0935	0.0934	0.0923	0.0923	0.0921	0.0916	0.091	0.0913	0.0916	0.0917	0.0915	0.0915
Even_rep1_BW0.125_p5	0.1092	0.0984	0.096	0.0948	0.0934	0.0931	0.0933	0.0932	0.093	0.0926	0.0926	0.0922	0.0916	0.0915	0.0911	0.0903	0.0903	0.0899	0.0896	0.0887	0.0886	0.0888	0.089	0.0886	0.089
Even_rep1_MG0.125_p5	0.1083	0.0973	0.0953	0.0933	0.0925	0.0922	0.0919	0.0917	0.0911	0.0908	0.091	0.091	0.0906	0.0922	0.1604	0.2844	0.5819	0.7504	0.8606	1.1775	1.4283	1.5759	1.6973	1.7751	1.8356
Even_rep1_Triclosan_resistant_BW0.125_p5	0.1076	0.0962	0.0936	0.0924	0.0939	0.1283	0.5639	0.9894	1.2843	1.5158	1.6112	1.6786	1.7189	1.7511	1.793	1.8181	1.8426	1.8663	1.889	1.9144	1.9276	1.9407	1.9621	1.9759	1.9908
Even_rep1_yibA0.015_p5	0.1189	0.1075	0.1043	0.1058	0.1359	0.3472	0.8848	1.4233	1.4924	1.5897	1.6685	1.7546	1.818	1.8483	1.8842	1.9147	1.932	1.9458	1.9675	1.9861	1.9926	2.0019	2.0177	2.0326	2.0375
Even_rep1_yjcF0.015_p5	0.1113	0.1006	0.099	0.103	0.1957	0.6166	0.8695	1.3384	1.4505	1.5937	1.7452	1.8191	1.8711	1.9125	1.9461	1.9813	2.0023	2.0156	2.0336	2.0523	2.0594	2.0606	2.0719	2.0836	2.09
Even_rep1_yjbI0.015_p5	0.116	0.1067	0.1052	0.109	0.1737	0.5086	0.9328	1.4709	1.526	1.6335	1.7671	1.8401	1.8667	1.8952	1.9314	1.9625	1.9869	1.996	2.0101	2.0328	2.036	2.0466	2.0614	2.0691	2.0754
Even_rep1_yjbL0.015_p5	0.1081	0.0992	0.0978	0.1031	0.1598	0.6668	1.0433	1.3473	1.4318	1.5219	1.6079	1.6775	1.719	1.7549	1.7841	1.8177	1.8394	1.8567	1.8759	1.8973	1.9041	1.9132	1.9265	1.9371	1.9425
Even_rep1_yigF0.015_p5	0.1188	0.1109	0.1106	0.1202	0.2688	0.6817	1.1395	1.4379	1.5465	1.643	1.7207	1.7791	1.8356	1.891	1.9336	1.9653	1.984	1.9932	1.999	2.0168	2.0249	2.0275	2.0397	2.0424	2.0451
Even_rep1_acrB0.015_p5	0.1104	0.0998	0.0979	0.097	0.0964	0.0958	0.0964	0.0963	0.0962	0.0963	0.0964	0.1014	0.2315	0.6206	0.761	0.9574	1.2724	1.4995	1.6394	1.7473	1.8191	1.8974	1.9516	1.9668	1.9928
Even_rep1_aroE0.015_p5	0.1073	0.0977	0.0969	0.1003	0.1576	0.5963	1.1661	1.3529	1.4518	1.5419	1.6264	1.6961	1.7593	1.8233	1.8689	1.908	1.9354	1.9503	1.969	1.9914	1.9985	2.0081	2.0138	2.03	2.036
Even_rep1_aroD0.015_p5	0.1107	0.1003	0.0993	0.101	0.1293	0.4027	1.0868	1.2598	1.361	1.451	1.5113	1.5738	1.6331	1.6754	1.7183	1.7603	1.7873	1.816	1.843	1.8766	1.8872	1.9009	1.9175	1.9299	1.9414
Even_rep1_aroC0.015_p5	0.111	0.1004	0.099	0.1038	0.1726	0.7624	1.1617	1.3986	1.5383	1.6279	1.7073	1.7629	1.8125	1.863	1.9111	1.9486	1.9651	1.9752	1.9896	2.0149	2.0165	2.0147	2.0258	2.0372	2.0415
Even_rep1_fre0.015_p5	0.1071	0.0968	0.096	0.1036	0.2036	0.5166	0.9812	1.408	1.54	1.6155	1.6876	1.7479	1.7991	1.8443	1.898	1.9493	1.9687	1.9779	1.9922	2.0178	2.021	2.0189	2.0305	2.0432	2.0533
Even_rep1_sspA0.015_p5	0.1096	0.0995	0.0975	0.0979	0.1112	0.2165	0.6603	0.8741	1.092	1.1885	1.3019	1.4143	1.4956	1.5464	1.6046	1.6513	1.6888	1.7171	1.7307	1.7566	1.7656	1.7789	1.7969	1.8076	1.8158
Even_rep1_minC0.015_p5	0.1083	0.0967	0.0944	0.095	0.1041	0.1644	0.3001	0.4407	0.7134	0.9961	1.1721	1.3126	1.4352	1.5469	1.6317	1.6948	1.7408	1.7712	1.7977	1.8269	1.8425	1.8539	1.8744	1.8798	1.8888
Even_rep1_gcvP0.015_p5	0.1206	0.1106	0.1084	0.1134	0.1995	0.7709	1.1793	1.4241	1.506	1.5965	1.6659	1.7288	1.7778	1.8304	1.8852	1.9259	1.9487	1.9729	1.9914	2.0156	2.0153	2.008	2.0233	2.0284	2.036
Even_rep1_treC0.015_p5	0.1187	0.1094	0.1073	0.1112	0.1938	0.4875	0.6763	1.0637	1.383	1.594	1.7416	1.8285	1.9065	1.9797	1.9647	1.9886	2.0088	2.0164	2.0291	2.0446	2.0498	2.0449	2.0562	2.0588	2.0639
Even_rep1_galU0.015_p5	0.1199	0.1102	0.1086	0.1143	0.221	0.735	1.0551	1.4968	1.5983	1.6923	1.7798	1.8513	1.908	1.9936	1.9866	2.0152	2.0322	2.0407	2.062	2.0839	2.0849	2.0813	2.1006	2.1077	2.12
Even_rep1_carB0.015_p5	0.1174	0.1083	0.1073	0.1159	0.2165	0.7039	1.005	1.2716	1.4546	1.5704	1.6676	1.7301	1.7795	1.8191	1.8505	1.8837	1.9079	1.9272	1.9544	1.9731	1.9772	1.976	1.9867	1.9964	2.0041
Even_rep1_purL0.015_p5	0.1161	0.1064	0.1053	0.11	0.2041	0.7238	1.0399	1.367	1.5177	1.617	1.7004	1.7624	1.8208	1.8702	1.9238	1.9567	1.9719	1.9876	2.0024	2.0255	2.0283	2.0331	2.0421	2.0537	2.0623
Even_rep1_creA0.015_p5	0.1186	0.1084	0.1066	0.111	0.1779	0.3884	0.9529	1.4459	1.5431	1.6295	1.7069	1.7855	1.8413	1.8815	1.909	1.9394	1.9556	1.9679	1.9824	1.998	2.0061	2.0073	2.0134	2.0327	2.0436
Even_rep1_cyaA0.015_p5	0.1173	0.1083	0.1641	0.1811	0.1831	0.649	0.9451	1.2726	1.3999	1.5233	1.63	1.6973	1.7532	1.7944	1.8402	1.8797	1.8931	1.9072	1.9261	1.9389	1.9442	1.9463	1.9575	1.9671	1.9751
Even_rep1_sapD0.015_p5	0.1174	0.1072	0.1059	0.1082	0.1575	0.4277	0.9627	1.2272	1.4368	1.5506	1.6329	1.7072	1.7663	1.8204	1.8816	1.9314	1.9434	1.9547	1.9731	1.9946	1.9963	2	2.0214	2.0246	2.0386
Even_rep1_psta0.015_p5	0.1158	0.1054	0.1031	0.1044	0.1239	0.245	0.9255	1.1987	1.3524	1.4574	1.5501	1.6135	1.6695	1.7374	1.7849	1.8111	1.8363	1.8521	1.8841	1.9084	1.9177	1.9269	1.9483	1.9584	1.9717
Even_rep1_BW0.015_p5	0.1119	0.1016	0.1002	0.1079	0.2125	0.4253	0.6751	0.9279	1.1147	1.2661	1.3947	1.4833	1.5713	1.6541	1.7309	1.8005	1.8344	1.8593	1.883	1.9036	1.9182	1.9141	1.9338	1.9461	1.9529
Even_rep1_MG0.015_p5	0.1155	0.1045	0.1021	0.1053	0.1444	0.2706	0.5581	0.8579	1.34	1.5292	1.6523	1.7752	1.8308	1.8659	1.9008	1.9396	1.9572	1.9721	1.9926	2.0082	2.0213	2.0276	2.0341	2.0472	2.0558
Even_rep1_Triclosan_resistant_BW0.015_p5	0.1157	0.1034	0.1016	0.1044	0.1719	0.9238	1.238	1.4417	1.5898	1.6696	1.7383	1.7948	1.8403	1.8796	1.9331	1.971	1.9841	1.9873	1.996	2.014	2.0193	2.018	2.0314	2.042	2.0574
Even_rep1_yibA_p5	0.1078	0.0971	0.0949	0.0981	0.1487	0.3	0.8145	1.4434	1.4944	1.578	1.6575	1.7563	1.8073	1.8417	1.8698	1.8946	1.9209	1.9351	1.9515	1.9653	1.9764	1.9835	1.9967	2.0072	2.0181
Even_rep1_yjcF_p5	0.1039	0.0942	0.0929	0.0947	0.1543	0.5856	0.8033	1.3077	1.4326	1.5802	1.7092	1.7996	1.8509	1.8852	1.9218	1.952	1.9796	1.9933	2.0091	2.0239	2.0343	2.0424	2.0452	2.06	2.071
Even_rep1_yjbI_p5	0.1036	0.0935	0.092	0.0941	0.1447	0.4327	0.7515	1.4512	1.5101	1.5989	1.6817	1.7774	1.8325	1.8657	1.8987	1.9279	1.9499	1.9608	1.9797	1.9972	2.0056	2.0135	2.0311	2.0472	2.049
Even_rep1_yjbL_p5	0.1067	0.0975	0.0961	0.0992	0.136	0.286	0.9822	1.3055	1.4037	1.5026	1.5986	1.6732	1.709	1.7407	1.7674	1.7992	1.8193	1.8401	1.8594	1.8753	1.8896	1.8961	1.913	1.9229	1.9356
Even_rep1_yigF_p5	0.1061	0.0965	0.0957	0.1009	0.214	0.5239	1.0937	1.4185	1.5385	1.6282	1.701	1.7705	1.8239	1.8786	1.9168	1.943	1.9557	1.9686	1.9888	1.9978	2.0031	2.009	2.0168	2.0308	2.0308
Even_rep1_acrB_p5	0.1066	0.0978	0.0965	0.1011	0.1536	0.3405	0.9032	1.4311	1.5181	1.5961	1.6667	1.7422	1.8099	1.8412	1.874	1.9012	1.9177	1.9227	1.952	1.9614	1.9739	1.9772	1.9927	2.0027	2.0139
Even_rep1_aroE_p5	0.103	0.0934	0.0925	0.0945	0.1313	0.6088	1.1554	1.327	1.4464	1.5439	1.6132	1.6871	1.7594	1.8151	1.855	1.8873	1.9063	1.9239	1.9418	1.9574	1.9653	1.9708	1.9871	1.9986	2.0062
Even_rep1_aroD_p5	0.1083	0.0979	0.0967	0.0978	0.1249	0.3847	1.0885	1.2674	1.3807	1.4625	1.5346	1.596	1.6404	1.6814	1.7196	1.7607	1.7866	1.8086	1.8331	1.8688	1.8774	1.8893	1.9122	1.9199	1.9281
Even_rep1_aroC_p5	0.1078	0.0975	0.0963	0.101	0.1593	0.6073	1.143	1.3873	1.5278	1.6136	1.688	1.7523	1.802	1.8526	1.8964	1.9276	1.94	1.9505	1.9709	1.9868	1.9903	1.9929	2.011	2.0209	2.0218
Even_rep1_fre_p5	0.1054	0.1016	0.1111	0.1063	0.1549	0.3269	0.9383	1.3578	1.4946	1.5766	1.6537	1.717	1.7697	1.8198	1.8789	1.9298	1.9429	1.9523	1.9745	1.9956	1.9983	2.0017	2.0152	2.0212	2.0335
Even_rep1_sspA_p5	0.1071	0.0969	0.095	0.0946	0.1042	0.172	0.6243	0.7958	1.0588	1.1665	1.2875	1.385	1.4694	1.5168	1.5727	1.6149	1.6483	1.6715	1.7015	1.7287	1.7429	1.7576	1.7772	1.7878	1.8021
Even_rep1_minC_p5	0.1069	0.0961	0.0943	0.0943	0.1022	0.167	0.3045	0.4593	0.6526	0.9449	1.1465	1.2978	1.419	1.5224	1.6299	1.6961	1.741	1.7741	1.8079	1.8255	1.84	1.8496	1.8645	1.8766	1.8854
Even_rep1_gcvP_p5	0.1151	0.1048	0.1032	0.1073	0.1674	0.6396	1.1221	1.3349	1.4858	1.5838	1.6667	1.7381	1.7891	1.8513	1.8962	1.9257	1.9427	1.9561	1.9757	1.9832	1.9832	1.9865	1.9956	2.0008	2.0149
Even_rep1_treC_p5	0.1112	0.1027	0.1005	0.1045	0.1303	0.3031	0.4647	0.8102	1.0664	1.3875	1.6286	1.7784	1.8603	1.9112	1.9455	1.9622	1.9787	1.9857	2.0079	2.0137	2.0147	2.0101	2.0166	2.0213	2.0297
Even_rep1_galU_p5	0.1118	0.1024	0.1005	0.1039	0.1701	0.3968	0.9418	1.4471	1.5699	1.6665	1.7441	1.8207	1.8825	1.9289	1.9611	1.9866	2.002	2.0214	2.0401	2.0502	2.0608	2.0657	2.0747	2.0899	2.1001
Even_rep1_carB_p5	0.1105	0.1015	0.1001	0.1013	0.1494	0.3678	0.8416	1.1671	1.3718	1.5094	1.614	1.6852	1.7301	1.7774	1.8246	1.8757	1.884	1.9016	1.9212	1.939	1.9448	1.9469	1.9598	1.9636	1.9741
Even_rep1_purL_p5	0.1185	0.1097	0.1079	0.11	0.1374	0.3103	0.9238	1.3157	1.4967	1.5874	1.6654	1.7295	1.7852	1.8389	1.8734	1.8962	1.9153	1.931	1.9502	1.9727	1.9776	1.9783	2.0001	2.0111	2.0217
Even_rep1_creA_p5	0.1164	0.1069	0.1045	0.1059	0.1334	0.2884	0.7711	1.388	1.4893	1.5867	1.6674	1.7397	1.8032	1.8419	1.8667	1.9038	1.9184	1.9365	1.9542	1.9729	1.9852	1.987	2.001	2.0088	2.023
Even_rep1_cyaA_p5	0.1143	0.1034	0.1016	0.1036	0.1353	0.325	0.9098	1.3159	1.4695	1.5674	1.6453	1.7081	1.7604	1.8059	1.8474	1.8823	1.902	1.9162	1.9369	1.947	1.9554	1.9573	1.9719	1.981	1.9927
Even_rep1_sapD_p5	0.1185	0.1083	0.1061	0.1074	0.1291	0.256	0.5069	1.1229	1.3429	1.4523	1.5479	1.617	1.6819	1.7438	1.8123	1.8494	1.8674	1.8824	1.9103	1.9276	1.9373	1.9389	1.9574	1.9616	1.9763
Even_rep1_psta_p5	0.1156	0.1059	0.1036	0.1041	0.1191	0.2248	0.8842	1.1743	1.3113	1.4133	1.4943	1.5598	1.6087	1.6689	1.7118	1.7459	1.7709	1.7911	1.8263	1.8553	1.8707	1.8756	1.9074	1.9135	1.9359
Even_rep1_BW_p5	0.1048	0.095	0.0939	0.0978	0.1499	0.3391	0.4744	0.8802	1.124	1.2567	1.3747	1.4603	1.5389	1.6189	1.6871	1.7355	1.7703	1.7895	1.8241	1.8579	1.8707	1.8748	1.896	1.9088	1.9229
Even_rep1_MG_p5	0.1055	0.0953	0.0938	0.0962	0.1244	0.2575	0.4716	0.7449	1.1092	1.3286	1.4907	1.6407	1.7084	1.7528	1.7925	1.8352	1.8696	1.8866	1.9097	1.934	1.9477	1.9536	1.972	1.9821	1.9967
Even_rep1_Triclosan_resistant_BW_p5	0.1157	0.1049	0.1035	0.1061	0.1439	0.8562	1.2173	1.4442	1.5914	1.6667	1.7405	1.7931	1.8346	1.8805	1.936	1.9714	1.9853	1.9957	2.001	2.0163	2.0172	2.0202	2.0369	2.0441	2.0653
Even_rep1_ptsN0.5_p6	0.1219	0.1134	0.1096	0.106	0.1037	0.1035	0.1037	0.104	0.1058	0.1066	0.1066	0.1064	0.1063	0.1056	0.1056	0.1055	0.106	0.1055	0.1054	0.105	0.1054	0.1047	0.1052	0.1049	0.1044
Even_rep1_trkA0.5_p6	0.1104	0.0954	0.0916	0.0892	0.0879	0.0878	0.0872	0.0876	0.089	0.0892	0.0887	0.0887	0.0889	0.0886	0.0889	0.0883	0.0885	0.0886	0.0883	0.0877	0.0887	0.0878	0.0874	0.0875	0.0872
Even_rep1_rsmB0.5_p6	0.1109	0.0935	0.0904	0.0888	0.0876	0.0878	0.087	0.0867	0.0862	0.0861	0.0857	0.0853	0.0854	0.0844	0.0846	0.0848	0.0848	0.0848	0.0845	0.084	0.0841	0.0838	0.0841	0.084	0.084
Even_rep1_tatC0.5_p6	0.1075	0.0915	0.0889	0.0877	0.087	0.0869	0.0855	0.0853	0.0852	0.0854	0.0847	0.0841	0.084	0.0835	0.0834	0.0836	0.0835	0.0832	0.083	0.0827	0.083	0.0827	0.0828	0.0826	0.0826
Even_rep1_NusBinsteadofA0.5_p6	0.1049	0.0894	0.0868	0.0853	0.0844	0.0845	0.0835	0.0834	0.0835	0.0831	0.0829	0.0823	0.0823	0.0819	0.082	0.082	0.0819	0.0819	0.0818	0.0814	0.082	0.0809	0.0814	0.0812	0.0808
Even_rep1_greA0.5_p6	0.1125	0.0931	0.0901	0.0888	0.0882	0.0881	0.0873	0.0873	0.0871	0.0871	0.087	0.0876	0.0869	0.0866	0.0865	0.0864	0.0864	0.0867	0.0863	0.0854	0.0857	0.0855	0.0854	0.0853	0.0851
Even_rep1_metL0.5_p6	0.1112	0.0951	0.0921	0.091	0.0893	0.089	0.0888	0.0882	0.0882	0.0877	0.0875	0.0869	0.0868	0.0861	0.0862	0.086	0.0862	0.0864	0.086	0.0853	0.0855	0.0855	0.0851	0.0851	0.0849
Even_rep1_yhiL0.5_p6	0.1038	0.0897	0.0868	0.0863	0.0852	0.085	0.0847	0.0846	0.0837	0.0845	0.0843	0.0831	0.0833	0.0828	0.083	0.0827	0.0833	0.0831	0.0829	0.0822	0.0824	0.0827	0.0821	0.0821	0.0819
Even_rep1_wzzE0.5_p6	0.1047	0.0901	0.0874	0.0861	0.0858	0.0853	0.0853	0.0851	0.0842	0.0841	0.0847	0.0838	0.084	0.0832	0.0835	0.0832	0.0833	0.0838	0.0835	0.0828	0.0832	0.0831	0.0835	0.0831	0.0832
Even_rep1_fimI0.5_p6	0.1089	0.0919	0.0897	0.0883	0.0871	0.087	0.0868	0.0864	0.0863	0.0865	0.0866	0.0859	0.0858	0.0861	0.0859	0.0856	0.0856	0.0855	0.0852	0.0847	0.0848	0.0846	0.0846	0.0846	0.0844
Even_rep1_trkH0.5_p6	0.1027	0.0884	0.0863	0.0847	0.084	0.084	0.0837	0.0837	0.0835	0.0836	0.0834	0.0827	0.0825	0.0827	0.0823	0.0817	0.0823	0.0822	0.082	0.0817	0.0817	0.0811	0.0814	0.0818	0.0815
Even_rep1_dgoR0.5_p6	0.1054	0.0915	0.089	0.0872	0.0868	0.086	0.0858	0.0853	0.0853	0.0859	0.085	0.0844	0.0847	0.0847	0.0857	0.0847	0.0856	0.0844	0.0849	0.0846	0.0845	0.0844	0.0845	0.084	0.0839
Even_rep1_ybcV0.5_p6	0.1166	0.1006	0.0967	0.0937	0.0921	0.0917	0.0914	0.091	0.0923	0.0932	0.095	0.0959	0.0958	0.0966	0.0958	0.0954	0.0957	0.0959	0.0976	0.0973	0.0955	0.0957	0.0969	0.0955	0.0957
Even_rep1_marR0.5_p6	0.1121	0.0971	0.0952	0.0924	0.0913	0.0912	0.0908	0.0902	0.0899	0.091	0.0903	0.0903	0.0903	0.0894	0.0893	0.0892	0.0895	0.0892	0.089	0.089	0.0883	0.0877	0.0885	0.0884	0.0881
Even_rep1_ypjC0.5_p6	0.1191	0.1003	0.0972	0.0942	0.0932	0.0923	0.0922	0.0916	0.0922	0.0926	0.0914	0.092	0.0919	0.0902	0.0911	0.0901	0.0904	0.0904	0.0905	0.0901	0.0898	0.089	0.0894	0.0893	0.0884
Even_rep1_yabP0.5_p6	0.104	0.091	0.0882	0.0864	0.0868	0.0856	0.0855	0.0847	0.0846	0.0851	0.0846	0.0846	0.0847	0.084	0.0843	0.0841	0.0842	0.0841	0.0838	0.0835	0.0835	0.0828	0.0833	0.0827	0.0833
Even_rep1_ycjD0.5_p6	0.1027	0.0899	0.0873	0.0863	0.0861	0.0858	0.0848	0.0847	0.0842	0.0851	0.0848	0.0848	0.0845	0.0844	0.0842	0.085	0.0843	0.0842	0.0842	0.0841	0.084	0.0835	0.0835	0.0831	0.0833
Even_rep1_ubiH0.5_p6	0.1039	0.0914	0.0877	0.0871	0.086	0.0856	0.0853	0.085	0.0857	0.0855	0.0849	0.0858	0.085	0.0849	0.0849	0.0862	0.0851	0.0854	0.0853	0.0852	0.085	0.0842	0.0846	0.0842	0.0846
Even_rep1_glpR0.5_p6	0.1118	0.098	0.0948	0.0926	0.0921	0.0917	0.0916	0.0908	0.0914	0.0922	0.0904	0.0901	0.0901	0.0894	0.0894	0.0904	0.0902	0.0894	0.0899	0.0894	0.0893	0.0885	0.0887	0.0884	0.0886
Even_rep1_ybbC0.5_p6	0.1081	0.0947	0.0909	0.0893	0.0896	0.0883	0.0879	0.0875	0.0871	0.0887	0.0875	0.0872	0.0869	0.0868	0.0863	0.0873	0.0873	0.0864	0.0865	0.0861	0.0861	0.0856	0.0875	0.0854	0.0853
Even_rep1_gadE0.5_p6	0.1076	0.094	0.0906	0.089	0.0883	0.0882	0.0876	0.0872	0.0869	0.0876	0.0868	0.0871	0.0863	0.0859	0.0854	0.0868	0.0859	0.0855	0.0855	0.0849	0.0853	0.0844	0.0855	0.0847	0.0845
Even_rep1_BW0.5_p6	0.1114	0.0963	0.0931	0.0914	0.0901	0.0899	0.0893	0.0898	0.089	0.0905	0.089	0.0888	0.0888	0.088	0.0883	0.0892	0.0893	0.0881	0.0878	0.0873	0.0875	0.0867	0.0876	0.087	0.0868
Even_rep1_MG0.5_p6	0.1044	0.0903	0.0875	0.0859	0.086	0.0858	0.0848	0.0845	0.0843	0.0844	0.084	0.0839	0.0838	0.0833	0.0836	0.0844	0.0848	0.0837	0.0836	0.0831	0.0837	0.0828	0.0829	0.0825	0.0827
Even_rep1_Triclosan_resistant_BW0.5_p6	0.1089	0.0942	0.0914	0.0889	0.0891	0.0924	0.0977	0.1139	0.1387	0.1766	0.2618	0.3356	0.3812	0.4295	0.5197	0.6278	0.8109	0.9643	1.1024	1.2236	1.3339	1.4411	1.5301	1.608	1.6764
Even_rep1_ptsN0.125_p6	0.1295	0.1113	0.1076	0.1056	0.1059	0.1179	0.1528	0.2621	0.3989	0.4847	0.5595	0.6374	0.7445	0.8595	0.9806	1.0909	1.1865	1.2812	1.3734	1.4602	1.5454	1.6169	1.6895	1.7545	1.8067
Even_rep1_trkA0.125_p6	0.1323	0.1128	0.1085	0.1047	0.1044	0.1056	0.1159	0.2032	0.3348	0.4654	0.5623	0.6433	0.7488	0.8426	0.9284	1.0252	1.1361	1.2337	1.3619	1.4651	1.5797	1.6764	1.7513	1.8226	1.851
Even_rep1_rsmB0.125_p6	0.1273	0.1103	0.1057	0.1027	0.102	0.1031	0.1074	0.1323	0.2124	0.3173	0.4233	0.4993	0.5793	0.6819	0.8015	0.89	1.003	1.091	1.193	1.2705	1.3658	1.4571	1.5518	1.6565	1.7494
Even_rep1_tatC0.125_p6	0.1117	0.0973	0.0951	0.0933	0.092	0.092	0.0916	0.0912	0.0912	0.0917	0.0922	0.0916	0.095	0.1073	0.1669	0.2601	0.3625	0.4369	0.5264	0.6491	0.7977	0.9474	0.9851	1.0066	1.02
Even_rep1_NusBinsteadofA0.125_p6	0.1113	0.0975	0.0952	0.0939	0.0923	0.0915	0.0916	0.0925	0.0944	0.1041	0.1345	0.2171	0.343	0.4811	0.5802	0.6716	0.785	0.9286	1.0711	1.2099	1.3403	1.4519	1.5514	1.6408	1.7289
Even_rep1_greA0.125_p6	0.1125	0.0978	0.0958	0.0946	0.0938	0.0929	0.0924	0.0931	0.0933	0.0943	0.0936	0.093	0.0938	0.0937	0.0934	0.0928	0.0933	0.0924	0.0925	0.0922	0.0937	0.0921	0.0911	0.0909	0.0901
Even_rep1_metL0.125_p6	0.1198	0.1026	0.1	0.0982	0.0974	0.0959	0.097	0.1051	0.1372	0.2369	0.3646	0.4485	0.5025	0.5521	0.6549	0.8438	1.0525	1.2423	1.4424	1.6206	1.7588	1.8577	1.9287	1.9681	2.0069
Even_rep1_yhiL0.125_p6	0.111	0.0977	0.0953	0.0941	0.0927	0.091	0.0916	0.0928	0.0958	0.1144	0.1947	0.3376	0.4191	0.5928	0.6185	0.677	0.7395	0.7364	0.761	0.8148	0.8772	0.9213	0.9948	1.0645	1.1346
Even_rep1_wzzE0.125_p6	0.1099	0.0949	0.0925	0.0908	0.0899	0.0889	0.0891	0.0886	0.0888	0.089	0.0889	0.0904	0.097	0.1161	0.1599	0.2442	0.372	0.5842	0.7876	0.9329	1.0401	1.137	1.219	1.2833	1.329
Even_rep1_fimI0.125_p6	0.1094	0.0951	0.0929	0.0913	0.0905	0.09	0.0893	0.0895	0.0892	0.0901	0.0921	0.097	0.1151	0.1557	0.2265	0.3386	0.4877	0.6649	0.7466	0.8227	0.9152	1.0744	1.3221	1.4961	1.6159
Even_rep1_trkH0.125_p6	0.1054	0.0904	0.0875	0.0858	0.0848	0.0844	0.0844	0.0877	0.1288	0.2181	0.4041	0.5884	0.789	0.8959	0.9549	1.194	1.3045	1.3822	1.4577	1.5263	1.5905	1.6516	1.6935	1.7373	1.776
Even_rep1_dgoR0.125_p6	0.1116	0.0943	0.0904	0.0887	0.0877	0.0887	0.0877	0.0872	0.0869	0.0873	0.0904	0.1098	0.1572	0.2698	0.4452	0.6113	0.7115	0.7655	0.8542	0.9474	1.0273	1.1154	1.1929	1.2613	1.321
Even_rep1_ybcV0.125_p6	0.118	0.1025	0.0994	0.0972	0.0958	0.0958	0.0963	0.1011	0.1232	0.1906	0.3079	0.4241	0.5161	0.6313	0.7837	1.0149	1.1749	1.2987	1.4177	1.5296	1.6409	1.7161	1.7512	1.8163	1.8815
Even_rep1_marR0.125_p6	0.133	0.1134	0.1083	0.1046	0.1026	0.102	0.1013	0.1009	0.1006	0.1008	0.1004	0.0994	0.0994	0.0979	0.0977	0.0978	0.0976	0.0974	0.0967	0.096	0.0963	0.0954	0.0957	0.0957	0.0955
Even_rep1_ypjC0.125_p6	0.1142	0.1002	0.0959	0.0931	0.0928	0.0963	0.1204	0.1967	0.2789	0.3537	0.4326	0.5111	0.6502	0.7888	0.9053	1.0001	1.083	1.1628	1.2425	1.3234	1.4078	1.4886	1.5729	1.6498	1.7469
Even_rep1_yabP0.125_p6	0.1211	0.1064	0.1036	0.1009	0.1	0.1001	0.1002	0.1053	0.1351	0.2256	0.3544	0.4711	0.5387	0.6231	0.6674	0.7412	0.7995	0.8688	0.945	1.0416	1.1306	1.1956	1.2926	1.3909	1.5311
Even_rep1_ycjD0.125_p6	0.1075	0.0951	0.0919	0.0912	0.0902	0.09	0.0904	0.0909	0.0948	0.1192	0.2213	0.3224	0.4295	0.5268	0.6499	0.7914	1.0074	1.1834	1.3352	1.4554	1.5552	1.6324	1.7122	1.7754	1.843
Even_rep1_ubiH0.125_p6	0.1116	0.0976	0.0949	0.093	0.0922	0.0916	0.0914	0.0912	0.0926	0.1003	0.1306	0.2137	0.2959	0.3848	0.4626	0.7186	1.053	1.2602	1.4008	1.5234	1.6235	1.7027	1.8062	1.8855	1.9494
Even_rep1_glpR0.125_p6	0.1178	0.1007	0.0992	0.0971	0.0957	0.0961	0.0977	0.103	0.1296	0.2227	0.3308	0.4381	0.5386	0.6309	0.7707	0.9531	1.1341	1.2774	1.3977	1.4924	1.5829	1.6452	1.727	1.7867	1.843
Even_rep1_ybbC0.125_p6	0.1192	0.1035	0.1009	0.0987	0.0971	0.0984	0.1093	0.178	0.3358	0.4646	0.5397	0.6912	0.882	1.0614	1.2148	1.3488	1.4637	1.5674	1.6546	1.7326	1.8011	1.8345	1.892	1.9247	1.9565
Even_rep1_gadE0.125_p6	0.1064	0.0928	0.0905	0.0889	0.0883	0.0882	0.0878	0.0888	0.0928	0.108	0.1596	0.2985	0.4573	0.6092	0.7441	0.9921	1.1051	1.1673	1.2362	1.3017	1.3676	1.4313	1.4676	1.4826	1.4969
Even_rep1_BW0.125_p6	0.1122	0.0989	0.0968	0.0946	0.0937	0.0942	0.094	0.0969	0.099	0.0985	0.0969	0.0929	0.0932	0.0947	0.0936	0.0953	0.0938	0.0932	0.0923	0.0918	0.0918	0.0911	0.091	0.0909	0.0907
Even_rep1_MG0.125_p6	0.106	0.0915	0.0894	0.0883	0.0875	0.0871	0.0871	0.0867	0.0861	0.0868	0.0862	0.0859	0.0861	0.0854	0.0856	0.0855	0.0854	0.0854	0.085	0.0848	0.0852	0.0847	0.0849	0.0849	0.0849
Even_rep1_Triclosan_resistant_BW0.125_p6	0.1062	0.0921	0.089	0.0879	0.0874	0.095	0.1899	0.3827	0.5031	0.6132	0.6939	0.7637	0.8076	0.8719	0.9432	0.9921	1.0322	1.086	1.1134	1.1552	1.203	1.2387	1.2864	1.3358	1.3896
Even_rep1_ptsN0.015_p6	0.111	0.0971	0.0955	0.1009	0.1832	0.3377	0.5025	0.695	0.7858	0.8634	0.9392	1.0284	1.1019	1.1723	1.244	1.3263	1.3729	1.4022	1.4418	1.4863	1.5349	1.5781	1.619	1.6606	1.701
Even_rep1_trkA0.015_p6	0.1072	0.0941	0.0924	0.0973	0.1374	0.2765	0.7266	1.0574	1.1551	1.2931	1.4191	1.4807	1.4979	1.5299	1.567	1.6027	1.6375	1.6717	1.7102	1.7307	1.7585	1.7758	1.7901	1.8051	1.8191
Even_rep1_rsmB0.015_p6	0.1046	0.0916	0.0906	0.1011	0.218	0.4185	0.6512	0.9017	1.0482	1.143	1.2431	1.3095	1.3768	1.4456	1.4911	1.5145	1.5489	1.5679	1.6097	1.6451	1.6766	1.7013	1.7342	1.7672	1.7978
Even_rep1_tatC0.015_p6	0.1075	0.0945	0.0925	0.0944	0.0948	0.1048	0.1481	0.2304	0.3078	0.3977	0.4972	0.5785	0.6715	0.7906	0.9208	0.9974	1.0238	1.03	1.0467	1.0445	1.0467	1.0509	1.0515	1.0537	1.0516
Even_rep1_NusBinsteadofA0.015_p6	0.1082	0.0959	0.0939	0.0964	0.1216	0.2952	0.5086	0.7179	0.855	0.9418	1.0164	1.0872	1.1608	1.2243	1.2768	1.3389	1.3889	1.436	1.4926	1.5402	1.5985	1.6509	1.722	1.774	1.8185
Even_rep1_greA0.015_p6	0.109	0.0962	0.0955	0.104	0.1692	0.3209	0.6022	0.8562	1.0145	1.1031	1.1825	1.2701	1.335	1.4103	1.485	1.5658	1.6189	1.6503	1.688	1.7065	1.7352	1.7493	1.7675	1.7793	1.7994
Even_rep1_metL0.015_p6	0.1084	0.0948	0.0934	0.0955	0.1191	0.2349	0.3851	0.5925	0.9213	1.279	1.4886	1.6057	1.6657	1.7068	1.7503	1.7991	1.8371	1.8662	1.8913	1.8992	1.9189	1.9276	1.9462	1.9538	1.9705
Even_rep1_yhiL0.015_p6	0.102	0.0896	0.0883	0.095	0.1448	0.326	0.6017	1.0498	1.2474	1.3417	1.4164	1.4969	1.5844	1.6344	1.6665	1.7015	1.7303	1.7568	1.7827	1.7935	1.8179	1.8269	1.8475	1.8601	1.8731
Even_rep1_wzzE0.015_p6	0.1066	0.0935	0.0926	0.1081	0.2264	0.4522	0.6318	0.8883	1.0146	1.1085	1.1893	1.2573	1.3217	1.3888	1.4373	1.4695	1.4863	1.506	1.5392	1.5679	1.6104	1.6449	1.6885	1.7271	1.7688
Even_rep1_fimI0.015_p6	0.1044	0.0915	0.09	0.1026	0.2465	0.465	0.7181	0.9276	1.0149	1.0887	1.15	1.1999	1.2514	1.3213	1.3502	1.3847	1.4029	1.4267	1.4535	1.4754	1.5005	1.5216	1.5401	1.5623	1.5895
Even_rep1_trkH0.015_p6	0.1023	0.092	0.0916	0.0998	0.2367	0.441	0.6452	0.787	0.9114	1.014	1.115	1.2003	1.2788	1.3489	1.4191	1.5037	1.5408	1.5859	1.6351	1.6691	1.709	1.7423	1.7733	1.8033	1.8339
Even_rep1_dgoR0.015_p6	0.1056	0.0918	0.0905	0.0983	0.2128	0.4195	0.6145	0.8015	0.9013	0.9859	1.0562	1.1252	1.1776	1.2436	1.309	1.339	1.3645	1.4011	1.4296	1.4575	1.5058	1.5594	1.6133	1.6576	1.7058
Even_rep1_ybcV0.015_p6	0.1131	0.0992	0.0971	0.1032	0.2012	0.3958	0.5639	0.9812	1.0855	1.1387	1.1991	1.2391	1.2932	1.369	1.3625	1.3848	1.4165	1.4432	1.4796	1.5145	1.5508	1.5846	1.617	1.6454	1.6732
Even_rep1_marR0.015_p6	0.1123	0.1002	0.0993	0.1048	0.1699	0.4133	0.9041	1.0402	1.1329	1.2176	1.2753	1.3508	1.4244	1.4511	1.4901	1.5271	1.5713	1.6081	1.6471	1.6778	1.7141	1.7403	1.7736	1.7919	1.8139
Even_rep1_ypjC0.015_p6	0.1117	0.0984	0.0968	0.1039	0.2546	0.4963	0.7127	0.9865	1.1081	1.1875	1.2637	1.3135	1.3779	1.4448	1.4764	1.5037	1.5352	1.5691	1.5953	1.6311	1.6628	1.6953	1.7286	1.7624	1.7939
Even_rep1_yabP0.015_p6	0.1059	0.0941	0.0935	0.1035	0.2362	0.4656	0.6612	0.905	1.014	1.1076	1.1946	1.2843	1.3592	1.4361	1.5087	1.5847	1.6214	1.6706	1.714	1.7472	1.7874	1.8157	1.8415	1.8546	1.8792
Even_rep1_ycjD0.015_p6	0.1023	0.0901	0.089	0.0987	0.1944	0.3846	0.6564	0.8114	0.9247	1.0197	1.1012	1.1789	1.2385	1.3064	1.3842	1.4396	1.4776	1.5179	1.5545	1.5839	1.6215	1.6451	1.6751	1.7003	1.7268
Even_rep1_ubiH0.015_p6	0.1086	0.0964	0.0956	0.1037	0.184	0.4648	0.7162	1.0565	1.2084	1.3078	1.3994	1.4699	1.5327	1.6002	1.6373	1.6751	1.7032	1.7321	1.7651	1.792	1.8367	1.8665	1.9069	1.9434	1.9814
Even_rep1_glpR0.015_p6	0.1075	0.0943	0.0917	0.0934	0.1257	0.3238	0.463	0.8212	0.9233	1.0335	1.1223	1.2331	1.3211	1.4145	1.4864	1.5129	1.541	1.5872	1.6208	1.6524	1.689	1.7197	1.7532	1.7846	1.8152
Even_rep1_ybbC0.015_p6	0.1102	0.0964	0.0945	0.1021	0.2437	0.4854	0.6751	0.9148	1.0232	1.1259	1.2217	1.3051	1.3753	1.4616	1.5325	1.5675	1.5979	1.6284	1.6534	1.679	1.7035	1.7237	1.7516	1.7687	1.792
Even_rep1_gadE0.015_p6	0.1038	0.0909	0.0894	0.096	0.1336	0.3188	0.8956	1.1943	1.2792	1.3907	1.4806	1.574	1.6219	1.6557	1.6888	1.7232	1.7507	1.7758	1.8011	1.816	1.8397	1.854	1.8719	1.8814	1.8956
Even_rep1_BW0.015_p6	0.1061	0.0942	0.0931	0.098	0.1558	0.3731	0.5317	0.6667	0.7854	0.8781	0.9693	1.0578	1.1343	1.2035	1.2701	1.3408	1.4001	1.5047	1.5233	1.5458	1.5783	1.5992	1.6232	1.6377	1.6588
Even_rep1_MG0.015_p6	0.1025	0.0898	0.0881	0.0986	0.1494	0.3103	0.5681	0.7771	1.0975	1.2557	1.3683	1.4378	1.5139	1.5443	1.5689	1.5958	1.6151	1.6479	1.6774	1.7036	1.7386	1.758	1.7908	1.8046	1.8258
Even_rep1_Triclosan_resistant_BW0.015_p6	0.1033	0.0904	0.0886	0.0967	0.1876	0.4797	0.5952	0.7851	0.8448	0.9088	0.9901	1.0544	1.1221	1.1628	1.2096	1.2546	1.3089	1.3665	1.3799	1.3939	1.414	1.4419	1.4778	1.5074	1.5457
Even_rep1_ptsN_p6	0.1102	0.096	0.096	0.1051	0.2091	0.3446	0.4724	0.6223	0.7534	0.8478	0.9454	1.0296	1.1006	1.1673	1.2317	1.2994	1.36	1.4077	1.4555	1.5013	1.5452	1.5837	1.6275	1.6631	1.7041
Even_rep1_trkA_p6	0.1088	0.0946	0.0932	0.0985	0.1309	0.2748	0.5567	0.9162	1.0447	1.2135	1.3341	1.4246	1.4563	1.4962	1.5436	1.5716	1.6155	1.6479	1.6835	1.7092	1.7331	1.7532	1.7716	1.7854	1.799
Even_rep1_rsmB_p6	0.1111	0.097	0.0959	0.1026	0.1952	0.3794	0.5965	0.836	0.9715	1.0622	1.1507	1.2196	1.2895	1.3567	1.3905	1.428	1.4684	1.505	1.545	1.5805	1.6226	1.654	1.6902	1.7239	1.7527
Even_rep1_tatC_p6	0.1027	0.0902	0.0895	0.0911	0.0973	0.1207	0.178	0.2466	0.3565	0.4348	0.5136	0.5945	0.7325	0.871	0.9539	0.9664	0.9792	0.9961	1.0066	1.0179	1.0246	1.0349	1.0511	1.0593	1.0763
Even_rep1_NusBinsteadofA_p6	0.1033	0.0909	0.0889	0.0893	0.0965	0.2277	0.4658	0.6747	0.8098	0.9145	0.9778	1.0326	1.0932	1.1552	1.207	1.2644	1.3098	1.3457	1.3818	1.4209	1.4705	1.521	1.5821	1.6496	1.7126
Even_rep1_greA_p6	0.103	0.0899	0.0884	0.094	0.1504	0.2662	0.4565	0.6896	0.8827	0.9834	1.0714	1.1336	1.2079	1.2765	1.3469	1.4023	1.4281	1.4729	1.5085	1.5357	1.5723	1.5959	1.6221	1.6451	1.6753
Even_rep1_metL_p6	0.105	0.0924	0.0912	0.0926	0.1111	0.2141	0.3446	0.4989	0.6618	0.9225	1.1792	1.4003	1.6002	1.688	1.7483	1.7993	1.8335	1.8526	1.8755	1.8822	1.9052	1.9202	1.9287	1.9418	1.9571
Even_rep1_yhiL_p6	0.104	0.091	0.09	0.0952	0.1425	0.3206	0.6596	1.0454	1.182	1.2689	1.3376	1.4096	1.4866	1.53	1.5568	1.5873	1.6125	1.6335	1.6526	1.6665	1.6923	1.7045	1.7202	1.7399	1.7578
Even_rep1_wzzE_p6	0.1084	0.0959	0.0953	0.1039	0.1704	0.3135	0.628	0.906	1.0065	1.0956	1.1582	1.2196	1.2725	1.3375	1.3817	1.409	1.446	1.4806	1.5161	1.5514	1.5886	1.6216	1.656	1.6895	1.7247
Even_rep1_fimI_p6	0.1044	0.0921	0.0913	0.0992	0.1934	0.3881	0.5909	0.8199	0.9438	1.0408	1.114	1.172	1.2381	1.2949	1.3136	1.3397	1.3759	1.3967	1.4263	1.4513	1.4781	1.5028	1.5315	1.5541	1.5879
Even_rep1_trkH_p6	0.1007	0.0876	0.0872	0.0959	0.2279	0.4	0.562	0.7191	0.8604	0.9682	1.0531	1.1278	1.2076	1.273	1.3522	1.4156	1.4482	1.4822	1.518	1.5513	1.5878	1.6222	1.6581	1.6948	1.7346
Even_rep1_dgoR_p6	0.105	0.0914	0.0897	0.101	0.2134	0.3846	0.5732	0.7151	0.8707	0.9817	1.0641	1.1329	1.1966	1.2647	1.3482	1.3766	1.4149	1.4524	1.4935	1.5339	1.5803	1.6249	1.6701	1.7141	1.7481
Even_rep1_ybcV_p6	0.1093	0.0954	0.0952	0.1052	0.2223	0.3882	0.614	0.8379	0.9503	1.0224	1.0961	1.1479	1.2024	1.26	1.2858	1.3169	1.3554	1.3988	1.4311	1.4694	1.5114	1.5497	1.584	1.6166	1.6469
Even_rep1_marR_p6	0.1124	0.1026	0.1338	0.1366	0.1938	0.361	0.7059	1.0298	1.0998	1.1804	1.2507	1.3237	1.3738	1.4003	1.4327	1.4643	1.4929	1.525	1.554	1.5844	1.6134	1.6378	1.6631	1.6846	1.7042
Even_rep1_ypjC_p6	0.1037	0.0923	0.0916	0.0975	0.1701	0.3271	0.4762	0.7653	0.9463	1.0331	1.1211	1.1871	1.2523	1.3169	1.3433	1.383	1.4229	1.4677	1.5043	1.5451	1.582	1.6144	1.6467	1.675	1.7057
Even_rep1_yabP_p6	0.1048	0.0917	0.0898	0.0989	0.178	0.352	0.5632	0.7589	0.9273	1.0305	1.1155	1.1875	1.2587	1.3325	1.4066	1.4364	1.4691	1.5079	1.5493	1.59	1.6413	1.6846	1.7209	1.7536	1.7841
Even_rep1_ycjD_p6	0.1029	0.0914	0.0891	0.0935	0.1647	0.3521	0.5912	0.7148	0.8515	0.9361	1.0119	1.0905	1.161	1.2355	1.3037	1.3413	1.3852	1.4236	1.4562	1.4817	1.5191	1.5505	1.5778	1.606	1.6354
Even_rep1_ubiH_p6	0.1031	0.0905	0.0892	0.093	0.1528	0.4839	0.7306	1.0132	1.1588	1.2649	1.3427	1.4115	1.4851	1.5124	1.5398	1.5762	1.6075	1.6411	1.6748	1.7096	1.7454	1.7702	1.7949	1.8228	1.8533
Even_rep1_glpR_p6	0.106	0.0933	0.0914	0.1005	0.1596	0.3693	0.6848	0.9614	1.0469	1.1486	1.2221	1.2876	1.3623	1.3979	1.4229	1.4552	1.4945	1.5397	1.5769	1.611	1.6522	1.6785	1.7095	1.7391	1.7604
Even_rep1_ybbC_p6	0.1045	0.0921	0.0905	0.097	0.1519	0.3368	0.545	0.7686	0.9199	1.0071	1.0863	1.1563	1.2386	1.3136	1.3591	1.4018	1.4343	1.4717	1.5028	1.5336	1.5652	1.593	1.6106	1.6288	1.6482
Even_rep1_gadE_p6	0.1074	0.0952	0.0933	0.0975	0.1506	0.322	0.8094	1.046	1.1632	1.2779	1.3608	1.4386	1.4737	1.5092	1.5386	1.5678	1.601	1.6272	1.6494	1.6688	1.6997	1.7181	1.7385	1.7575	1.7788
Even_rep1_BW_p6	0.1028	0.0904	0.0891	0.0961	0.1878	0.3879	0.5486	0.6694	0.7491	0.8064	0.8498	0.9097	0.9621	1.0133	1.0739	1.1384	1.2058	1.2443	1.2799	1.3136	1.3546	1.393	1.4397	1.4819	1.5218
Even_rep1_MG_p6	0.1007	0.0888	0.0879	0.0965	0.1459	0.2745	0.5179	0.6775	0.9699	1.2069	1.3378	1.4337	1.4926	1.524	1.5528	1.5821	1.6096	1.6458	1.6735	1.7034	1.7308	1.7586	1.7825	1.8073	1.8234
Even_rep1_Triclosan_resistant_BW_p6	0.1033	0.0906	0.089	0.0961	0.1989	0.4113	0.6114	0.7472	0.8124	0.8707	0.9386	1.0127	1.0829	1.144	1.2127	1.2812	1.3485	1.4047	1.4372	1.4607	1.4937	1.528	1.5726	1.6294	1.6829
Even_rep1_ompX0.5_p7	0.1055	0.0932	0.0927	0.1057	0.1068	0.0938	0.0868	0.0869	0.0995	0.0995	0.1015	0.1021	0.1081	0.1087	0.1081	0.1085	0.1076	0.1076	0.1069	0.1082	0.1075	0.1075	0.1081	0.1087	0.108
Even_rep1_purH0.5_p7	0.1104	0.0972	0.0939	0.0925	0.0908	0.0903	0.0893	0.0896	0.0887	0.0885	0.0892	0.0886	0.0875	0.0876	0.0876	0.0873	0.0882	0.0868	0.0869	0.0867	0.087	0.0872	0.0872	0.0871	0.0867
Even_rep1_acrR0.5_p7	0.106	0.0925	0.0898	0.0886	0.0872	0.0871	0.0863	0.0861	0.0857	0.0858	0.0848	0.0846	0.0848	0.0851	0.085	0.0849	0.0847	0.0843	0.0843	0.0842	0.0845	0.0843	0.0842	0.0842	0.0838
Even_rep1_kgtP0.5_p7	0.1079	0.0954	0.092	0.0907	0.0889	0.0889	0.0881	0.0883	0.0878	0.088	0.0875	0.0877	0.0878	0.0884	0.0879	0.0878	0.0877	0.0878	0.0874	0.0871	0.0872	0.087	0.0869	0.0863	0.0865
Even_rep1_napD0.5_p7	0.1202	0.1107	0.1051	0.1049	0.104	0.1042	0.1048	0.1034	0.1015	0.1008	0.1042	0.1013	0.1003	0.1012	0.1031	0.1024	0.104	0.1037	0.102	0.1018	0.1048	0.1012	0.0988	0.0973	0.0967
Even_rep1_pcnB0.5_p7	0.1227	0.1106	0.1067	0.1062	0.1049	0.1049	0.105	0.1039	0.1029	0.1023	0.1025	0.1018	0.1023	0.1017	0.1015	0.1007	0.1012	0.1011	0.1004	0.0998	0.1011	0.1009	0.0992	0.0988	0.099
Even_rep1_aroK0.5_p7	0.1142	0.1005	0.0973	0.0967	0.0952	0.0952	0.0946	0.094	0.0929	0.0927	0.0927	0.0918	0.0922	0.0919	0.0918	0.0912	0.0911	0.0913	0.0909	0.0906	0.0908	0.0908	0.0897	0.0896	0.0894
Even_rep1_ynfD0.5_p7	0.1193	0.1057	0.1026	0.1018	0.1006	0.1014	0.1009	0.1002	0.0994	0.0992	0.0993	0.0986	0.0998	0.0991	0.0989	0.0979	0.0981	0.0983	0.098	0.098	0.0981	0.0979	0.0968	0.0965	0.0969
OddandEven_rep1_SL13540.5_p7	0.1098	0.0971	0.0934	0.0929	0.0923	0.0928	0.0917	0.092	0.0912	0.0917	0.0909	0.0909	0.0924	0.0906	0.0913	0.0902	0.0903	0.091	0.0907	0.0905	0.0894	0.0894	0.0898	0.0894	0.0882
OddandEven_rep1_SL7020.5_p7	0.1117	0.1034	0.0965	0.1235	0.1322	0.3049	0.7918	1.1158	1.3165	1.4474	1.4648	1.5131	1.6199	1.78	1.875	1.9314	1.9583	1.977	2.0049	2.0111	2.0191	2.0249	2.0259	2.0277	2.0277
OddandEven_rep1_BW0.5_p7	0.1077	0.0953	0.0923	0.0918	0.0904	0.0906	0.0895	0.0896	0.0891	0.0891	0.0892	0.0889	0.0893	0.0891	0.0886	0.0885	0.0884	0.0887	0.0886	0.0882	0.0884	0.0886	0.0877	0.0874	0.0875
OddandEven_rep1_MG0.5_p7	0.1094	0.0975	0.095	0.0933	0.0929	0.0928	0.0923	0.0929	0.092	0.0926	0.0922	0.0917	0.0925	0.0927	0.092	0.0913	0.0915	0.0915	0.0916	0.0911	0.0923	0.0911	0.0905	0.0897	0.0895
OddandEven_rep1_Triclosan_resistant_BW0.5_p7	0.1041	0.0926	0.0893	0.0883	0.0878	0.0903	0.1125	0.1397	0.2459	0.342	0.4439	0.5571	0.6356	0.6978	0.7418	0.7778	0.7994	0.818	0.8514	0.8866	0.9161	0.9533	0.9851	1.036	1.0881
Even_rep1_ompX0.125_p7	0.1131	0.1008	0.0984	0.0974	0.0971	0.098	0.1029	0.127	0.234	0.366	0.4933	0.6117	0.8164	1.0348	1.2309	1.3918	1.5135	1.5932	1.6894	1.7543	1.823	1.8706	1.9206	1.9562	1.9973
Even_rep1_purH0.125_p7	0.1073	0.0957	0.0935	0.0932	0.093	0.0943	0.0982	0.1273	0.2176	0.3156	0.4039	0.5359	0.7567	1.055	1.2719	1.4199	1.5338	1.6186	1.7192	1.797	1.8661	1.9129	1.9422	1.9637	1.9856
Even_rep1_acrR0.125_p7	0.1045	0.0932	0.0905	0.089	0.0891	0.0893	0.0891	0.091	0.0995	0.1469	0.2612	0.3783	0.5053	0.6612	0.8555	1.0302	1.1706	1.2814	1.4064	1.4983	1.5943	1.669	1.7438	1.7992	1.8575
Even_rep1_kgtP0.125_p7	0.109	0.0972	0.0935	0.0924	0.0913	0.0921	0.0941	0.1173	0.2392	0.479	0.7277	0.7973	1.1484	1.3021	1.4637	1.54	1.6166	1.6952	1.7488	1.8042	1.8448	1.8776	1.9022	1.9211	1.9328
Even_rep1_napD0.125_p7	0.1189	0.1059	0.1032	0.1021	0.1045	0.1127	0.1459	0.2297	0.3284	0.4045	0.5297	0.6842	0.8626	0.9837	1.0897	1.1912	1.2898	1.3627	1.4566	1.5378	1.6158	1.6986	1.775	1.8282	1.8788
Even_rep1_pcnB0.125_p7	0.1166	0.1022	0.0996	0.0988	0.0986	0.1005	0.1071	0.139	0.219	0.319	0.4937	0.7566	1.0325	1.2094	1.3913	1.5457	1.6739	1.7627	1.8445	1.8865	1.9207	1.9585	1.9826	1.9929	2.0066
Even_rep1_aroK0.125_p7	0.1257	0.1081	0.106	0.1053	0.1091	0.1279	0.2135	0.3086	0.4202	0.5612	0.6961	0.8667	1.0142	1.1284	1.2351	1.3203	1.3931	1.458	1.5342	1.5886	1.6459	1.6897	1.7313	1.7798	1.8191
Even_rep1_ynfD0.125_p7	0.1138	0.1024	0.1004	0.0998	0.0997	0.1058	0.1314	0.213	0.3391	0.4434	0.6567	0.9458	1.1651	1.3268	1.4517	1.5523	1.6535	1.7267	1.8125	1.8582	1.9167	1.967	1.987	1.999	2.0157
OddandEven_rep1_SL13540.125_p7	0.1054	0.0936	0.0915	0.0909	0.0907	0.0908	0.0925	0.102	0.1228	0.2245	0.3544	0.5488	0.924	0.994	1.0823	1.118	1.177	1.1701	1.3754	1.4717	1.5085	1.5038	1.5012	1.523	1.5386
OddandEven_rep1_SL7020.125_p7	0.1121	0.1001	0.0983	0.0997	0.1193	0.2791	0.7544	1.11	1.1953	1.3525	1.5146	1.5703	1.6648	1.8233	1.9149	1.974	1.9994	2.0002	2.0229	2.0336	2.0423	2.0484	2.0557	2.0467	2.0517
OddandEven_rep1_BW0.125_p7	0.102	0.0902	0.089	0.0872	0.0896	0.1406	0.3383	0.504	0.6224	0.7046	0.7793	0.8189	0.8736	0.9259	0.9716	1.0151	1.062	1.112	1.1619	1.2028	1.2473	1.2989	1.3595	1.4136	1.5323
OddandEven_rep1_MG0.125_p7	0.107	0.0946	0.0921	0.0915	0.091	0.0909	0.09	0.0896	0.09	0.0898	0.0896	0.0892	0.09	0.0948	0.1156	0.1848	0.3368	0.4812	0.656	0.8035	0.9424	1.0984	1.1811	1.2027	1.1478
OddandEven_rep1_Triclosan_resistant_BW0.125_p7	0.1053	0.0926	0.0898	0.0894	0.0888	0.0959	0.2289	0.6032	0.7195	0.8732	0.9941	1.0098	1.0323	1.0517	1.0746	1.098	1.1267	1.158	1.1837	1.2058	1.2481	1.2883	1.3283	1.3623	1.4119
Even_rep1_ompX0.015_p7	0.1166	0.1068	0.1058	0.1123	0.2201	0.4055	0.6361	0.9597	1.1437	1.2672	1.3681	1.4537	1.5396	1.6217	1.6938	1.7329	1.775	1.8016	1.8379	1.854	1.875	1.8866	1.9015	1.9039	1.9218
Even_rep1_purH0.015_p7	0.107	0.0962	0.0945	0.1014	0.1663	0.4404	0.7949	1.0623	1.2406	1.3561	1.4524	1.5388	1.6153	1.6881	1.7548	1.803	1.85	1.8735	1.9154	1.9248	1.9479	1.9651	1.9833	1.9823	2.0034
Even_rep1_acrR0.015_p7	0.107	0.0963	0.0947	0.1028	0.1886	0.456	0.7987	1.1017	1.2173	1.3164	1.4028	1.4899	1.5631	1.6285	1.6958	1.7389	1.7833	1.8198	1.8452	1.8704	1.8908	1.9049	1.9062	1.9186	1.9329
Even_rep1_kgtP0.015_p7	0.1094	0.0961	0.0944	0.0971	0.1577	0.4694	1.0551	1.26	1.3412	1.3913	1.4891	1.5765	1.6472	1.6937	1.7304	1.7568	1.7798	1.8181	1.8364	1.8544	1.8667	1.8761	1.8928	1.8915	1.9051
Even_rep1_napD0.015_p7	0.1193	0.1059	0.1047	0.1132	0.1529	0.3753	0.6712	0.9563	1.0912	1.2607	1.3534	1.4207	1.4828	1.5165	1.553	1.5961	1.6384	1.6776	1.7161	1.7425	1.7744	1.7991	1.8232	1.8353	1.8575
Even_rep1_pcnB0.015_p7	0.1053	0.0944	0.0924	0.0959	0.1237	0.3907	0.7709	1.1645	1.2549	1.4095	1.5304	1.6398	1.7309	1.7767	1.8244	1.8657	1.9169	1.937	1.9668	1.9816	2.0019	2.0182	2.0343	2.037	2.0573
Even_rep1_aroK0.015_p7	0.1101	0.0985	0.0965	0.0993	0.1344	0.4131	0.7615	0.8691	1.1115	1.1821	1.2675	1.3461	1.414	1.4761	1.5024	1.5334	1.5651	1.5957	1.624	1.6512	1.6791	1.7011	1.7262	1.7461	1.7683
Even_rep1_ynfD0.015_p7	0.1165	0.1022	0.0998	0.1125	0.2127	0.3277	0.5235	0.8323	0.975	1.1194	1.2305	1.333	1.4254	1.5125	1.5964	1.6478	1.7087	1.7557	1.8026	1.8403	1.8757	1.8984	1.9209	1.9338	1.946
OddandEven_rep1_SL13540.015_p7	0.1098	0.1018	0.1003	0.102	0.1097	0.1476	0.3076	0.4234	0.4593	0.521	0.5582	0.655	0.811	1.0248	1.1606	1.2241	1.2777	1.3315	1.3908	1.4516	1.5179	1.5653	1.6156	1.6541	1.6965
OddandEven_rep1_SL7020.015_p7	0.1075	0.0966	0.0947	0.0964	0.1115	0.2621	0.7223	1.1272	1.2497	1.4385	1.5287	1.5932	1.7143	1.8834	1.9435	1.9709	1.9954	1.9893	2.0092	2.0151	2.0275	2.0344	2.0337	2.0325	2.0316
OddandEven_rep1_BW0.015_p7	0.1109	0.0997	0.111	0.1132	0.163	0.3231	0.4855	0.6194	0.6871	0.7699	0.8239	0.8705	0.9298	0.9895	1.0561	1.0876	1.1136	1.1396	1.1807	1.2149	1.2566	1.3	1.3519	1.3954	1.4434
OddandEven_rep1_MG0.015_p7	0.1101	0.1004	0.098	0.1029	0.1767	0.3323	0.4688	0.5545	0.6244	0.6883	0.7336	0.7801	0.8253	0.8584	0.9011	0.9404	1.0003	1.0608	1.1217	1.1404	1.162	1.1921	1.2308	1.2678	1.303
OddandEven_rep1_Triclosan_resistant_BW0.015_p7	0.1113	0.0992	0.0957	0.0953	0.0961	0.104	0.2277	0.6257	0.8014	0.8997	0.9934	1.0208	1.0809	1.1257	1.2229	1.2927	1.3345	1.4158	1.4326	1.4816	1.5182	1.5683	1.6066	1.6579	1.7015
Even_rep1_ompX_p7	0.118	0.1056	0.1031	0.1076	0.1776	0.403	0.7561	1.0504	1.2189	1.3535	1.4841	1.5839	1.6491	1.6952	1.7366	1.7615	1.7943	1.8297	1.8557	1.8757	1.8972	1.9204	1.9418	1.9529	1.9653
Even_rep1_purH_p7	0.1016	0.1139	0.0974	0.1112	0.1558	0.5228	0.9084	1.1325	1.1818	1.3465	1.4158	1.4678	1.6272	1.7349	1.8088	1.8461	1.8813	1.9294	1.9297	1.9424	1.9579	1.9704	1.9787	1.9918	1.9998
Even_rep1_acrR_p7	0.1101	0.0978	0.0955	0.1003	0.1472	0.3389	0.9277	1.2342	1.351	1.4674	1.5419	1.6382	1.7002	1.7567	1.8154	1.8392	1.871	1.9055	1.913	1.9263	1.9388	1.9558	1.9616	1.9757	1.977
Even_rep1_kgtP_p7	0.1052	0.0916	0.0889	0.0924	0.1363	0.2997	1.008	1.2655	1.363	1.4189	1.5355	1.6323	1.6929	1.7334	1.7679	1.7908	1.82	1.8549	1.8681	1.8856	1.9088	1.9196	1.9274	1.939	1.9465
Even_rep1_napD_p7	0.1256	0.1145	0.1125	0.1155	0.1674	0.3803	0.7119	0.8723	1.0992	1.2211	1.305	1.3923	1.4479	1.4927	1.539	1.586	1.6384	1.6827	1.7238	1.7588	1.7866	1.81	1.8315	1.8526	1.8657
Even_rep1_pcnB_p7	0.1408	0.1392	0.1209	0.1223	0.147	0.3133	0.614	0.9479	1.2201	1.2822	1.4046	1.5184	1.6273	1.6823	1.743	1.7879	1.8322	1.8637	1.8989	1.9214	1.9443	1.9626	1.9792	1.9922	2
Even_rep1_aroK_p7	0.1341	0.1212	0.1194	0.1199	0.1311	0.2582	0.7282	0.8593	1.11	1.176	1.2365	1.3048	1.3686	1.4232	1.4542	1.4903	1.5297	1.5587	1.5929	1.6218	1.6461	1.6703	1.6921	1.7138	1.7337
Even_rep1_ynfD_p7	0.1316	0.1181	0.1151	0.1178	0.1654	0.3444	0.6337	0.9491	1.0003	1.1138	1.2526	1.3529	1.4414	1.5222	1.5798	1.6274	1.6725	1.7105	1.7511	1.7884	1.8169	1.8473	1.8754	1.8891	1.9098
OddandEven_rep1_SL1354_p7	0.0994	0.0884	0.0857	0.0849	0.0873	0.1107	0.2466	0.5733	0.6143	0.7465	0.7001	0.8239	1.0079	1.1219	1.2877	1.3405	1.3986	1.469	1.5314	1.614	1.6555	1.7141	1.7295	1.7727	1.7847
OddandEven_rep1_SL702_p7	0.0984	0.0867	0.0843	0.0835	0.0863	0.1094	0.6703	1.045	1.2619	1.3967	1.5089	1.5583	1.7479	1.8814	1.9335	1.9732	2.0072	1.9892	2.0318	2.0386	2.0356	2.006	2.0193	2.0318	2.0039
OddandEven_rep1_BW_p7	0.1005	0.0883	0.0858	0.0869	0.1076	0.2531	0.4713	0.6207	0.7733	0.8893	0.9919	1.0544	1.1342	1.1914	1.2276	1.253	1.2753	1.3215	1.3736	1.4263	1.4825	1.5374	1.5894	1.6313	1.6661
OddandEven_rep1_MG_p7	0.1052	0.0939	0.0915	0.0938	0.1314	0.2634	0.4008	0.49	0.5677	0.6196	0.6683	0.7061	0.7524	0.8597	0.9457	1.0359	1.125	1.3462	1.3348	1.4325	1.5204	1.5809	1.642	1.6827	1.7333
OddandEven_rep1_Triclosan_resistant_BW_p7	0.102	0.0898	0.0868	0.0858	0.0852	0.0871	0.1322	0.4908	0.7088	0.83	0.9414	1.0696	1.1038	1.208	1.1975	1.3488	1.3752	1.4501	1.5141	1.5807	1.6504	1.7128	1.7204	1.7516	1.8169
Even_rep1_zntA0.5_p15	0.0792	0.0795	0.0797	0.0798	0.0801	0.0804	0.08	0.0809	0.0814	0.0813	0.0789	0.0787	0.0789	0.0791	0.0793	0.08	0.0802	0.0808	0.081	0.0813	0.0813	0.0813	0.0816	0.0819	0.0821
Even_rep1_yhip0.5_p15	0.0859	0.0835	0.0832	0.0836	0.0834	0.0838	0.0832	0.0829	0.0838	0.0836	0.0833	0.0849	0.0837	0.0839	0.0823	0.0828	0.083	0.0835	0.0828	0.0839	0.0834	0.0836	0.083	0.0829	0.0827
Even_rep1_phnP0.5_p15	0.0882	0.0982	0.0896	0.0888	0.0884	0.0883	0.0878	0.0884	0.0886	0.089	0.09	0.0904	0.0911	0.091	0.0918	0.0915	0.0909	0.0908	0.09	0.0894	0.0891	0.0889	0.0885	0.0886	0.0883
Even_rep1_uhpT0.5_p15	0.0868	0.0869	0.0853	0.0861	0.0863	0.0862	0.0857	0.0853	0.0853	0.0848	0.0847	0.0849	0.0849	0.0843	0.0841	0.0848	0.0839	0.0845	0.0839	0.0833	0.0836	0.0856	0.0868	0.0864	0.0862
Even_rep1_cutC0.5_p15	0.0853	0.0864	0.0855	0.0851	0.0855	0.0855	0.0857	0.0847	0.0848	0.0842	0.0846	0.0851	0.0848	0.0841	0.0843	0.0845	0.0845	0.0844	0.084	0.0842	0.0836	0.0838	0.0837	0.0838	0.084
Even_rep1_cstA0.5_p15	0.0863	0.087	0.0861	0.0859	0.0862	0.0858	0.0858	0.0863	0.086	0.0858	0.086	0.0864	0.0863	0.0857	0.0854	0.0853	0.0847	0.0854	0.0844	0.0845	0.084	0.0844	0.0845	0.0845	0.0845
Even_rep1_yjjQ0.5_p15	0.0902	0.0901	0.0892	0.0888	0.0892	0.0889	0.089	0.0891	0.0887	0.089	0.089	0.089	0.0886	0.0883	0.088	0.0877	0.0871	0.0874	0.0864	0.0862	0.0858	0.086	0.0865	0.087	0.0867
Even_rep1_yjgL0.5_p15	0.0909	0.09	0.089	0.0883	0.0885	0.0885	0.0889	0.0891	0.0888	0.0885	0.0884	0.0891	0.0891	0.0885	0.0885	0.0884	0.0879	0.0883	0.0874	0.0868	0.0866	0.087	0.0873	0.0879	0.0876
Even_rep1_glpT0.5_p15	0.1005	0.0981	0.0973	0.097	0.0966	0.0957	0.0964	0.0956	0.0959	0.0953	0.0968	0.0959	0.0958	0.0956	0.0952	0.0949	0.0945	0.0949	0.0945	0.0934	0.0932	0.0932	0.0932	0.0938	0.0936
Even_rep1_mcrC0.5_p15	0.1092	0.1062	0.1066	0.1068	0.1062	0.1057	0.1057	0.1053	0.105	0.1049	0.1051	0.1054	0.106	0.1056	0.1057	0.1059	0.1056	0.1064	0.1057	0.1056	0.1055	0.1054	0.1058	0.1059	0.1058
OddandEven_rep1_BW10.5_p15	0.1003	0.0976	0.0983	0.0979	0.0978	0.0974	0.0984	0.0982	0.0999	0.0994	0.0997	0.1	0.0997	0.0996	0.0989	0.0991	0.0988	0.0987	0.0983	0.0989	0.0988	0.0987	0.0996	0.0989	0.0988
OddandEven_rep1_BW20.5_p15	0.1045	0.1028	0.1043	0.1033	0.1038	0.1029	0.1027	0.1023	0.1049	0.1049	0.1059	0.1062	0.1064	0.1063	0.1061	0.1056	0.1052	0.106	0.1054	0.1054	0.1052	0.1052	0.1052	0.1057	0.1058
OddandEven_rep1_BW30.5_p15	0.0875	0.0869	0.0876	0.0875	0.0878	0.0873	0.0875	0.087	0.0879	0.0871	0.0886	0.0901	0.0908	0.091	0.0907	0.0906	0.0901	0.0905	0.0908	0.0898	0.0894	0.0897	0.0895	0.0907	0.0902
OddandEven_rep1_Triclosan_resistant_BW0.5_p15	0.0896	0.0878	0.0878	0.0878	0.0884	0.0903	0.094	0.0994	0.109	0.1331	0.1715	0.2563	0.4475	0.7145	0.8422	0.9665	1.0785	1.2221	1.3435	1.4313	1.5177	1.5761	1.651	1.7117	1.7652
Even_rep1_zntA0.125_p15	0.0833	0.0826	0.0822	0.0834	0.0831	0.0837	0.0837	0.0872	0.1514	0.5778	0.7853	0.9832	1.1957	1.3708	1.4649	1.5433	1.6262	1.71	1.7786	1.8526	1.8926	1.9276	1.9598	1.9752	1.9856
Even_rep1_yhip0.125_p15	0.0856	0.0853	0.0841	0.084	0.0841	0.0853	0.0845	0.0849	0.0852	0.1128	0.5308	0.7467	0.9798	1.0212	1.2129	1.4103	1.5711	1.7024	1.7978	1.8598	1.8975	1.9448	1.942	1.9555	1.9577
Even_rep1_phnP0.125_p15	0.0908	0.0902	0.0898	0.09	0.0899	0.0897	0.0894	0.091	0.0924	0.0908	0.0925	0.1362	0.6531	1.102	1.2813	1.4447	1.5825	1.669	1.7254	1.7661	1.8086	1.869	1.8851	1.9158	1.9242
Even_rep1_uhpT0.125_p15	0.0963	0.0956	0.0947	0.0941	0.0948	0.095	0.0949	0.0944	0.0962	0.3039	0.6231	0.8503	1.1566	1.4111	1.5473	1.6198	1.6869	1.7471	1.7982	1.8606	1.9055	1.962	1.9767	1.9957	1.9956
Even_rep1_cutC0.125_p15	0.0914	0.0921	0.0908	0.0915	0.0925	0.0936	0.094	0.0944	0.0944	0.1113	0.2009	0.4134	0.622	1.0477	1.2175	1.3814	1.5118	1.6037	1.6434	1.6843	1.7418	1.8154	1.851	1.8791	1.8951
Even_rep1_cstA0.125_p15	0.0921	0.0928	0.0909	0.0899	0.0905	0.0909	0.0903	0.0908	0.091	0.0902	0.0929	0.1028	0.1249	0.1683	0.2901	0.5161	0.6789	0.7899	0.9229	1.1668	1.4209	1.5535	1.5702	1.6071	1.6368
Even_rep1_yjjQ0.125_p15	0.092	0.0932	0.0913	0.0906	0.0914	0.0941	0.1059	0.1599	0.4321	0.6746	0.9934	1.2223	1.375	1.4786	1.5469	1.6036	1.6613	1.7168	1.7696	1.8371	1.8764	1.9264	1.938	1.9574	1.9693
Even_rep1_yjgL0.125_p15	0.1103	0.1105	0.1088	0.108	0.108	0.1086	0.1088	0.1097	0.1216	0.1643	0.2752	0.5814	0.8009	1.0921	1.2427	1.4035	1.485	1.5605	1.6345	1.6881	1.7411	1.8081	1.8439	1.8881	1.9179
Even_rep1_glpT0.125_p15	0.1135	0.1136	0.1118	0.111	0.1116	0.1147	0.1235	0.1489	0.3823	0.8324	1.0758	1.2968	1.4549	1.5654	1.6274	1.6937	1.7521	1.8265	1.8826	1.9422	1.9899	2.0332	2.0377	2.0478	2.0562
Even_rep1_mcrC0.125_p15	0.0968	0.097	0.0956	0.0951	0.0964	0.0968	0.0974	0.0975	0.0988	0.1004	0.1666	0.4567	0.6804	0.9227	1.1774	1.294	1.4456	1.5581	1.6257	1.6768	1.7317	1.8108	1.8337	1.851	1.8692
OddandEven_rep1_BW10.125_p15	0.0997	0.0993	0.0988	0.1011	0.1012	0.1018	0.1022	0.103	0.1055	0.2195	0.4972	0.7177	1.0341	1.1623	1.2638	1.3662	1.4294	1.4815	1.5703	1.6242	1.6698	1.7091	1.768	1.8008	1.8041
OddandEven_rep1_BW20.125_p15	0.1027	0.1029	0.1024	0.1035	0.1049	0.1056	0.1059	0.1064	0.107	0.1064	0.1068	0.1088	0.1118	0.1173	0.1376	0.174	0.2641	0.4238	0.5962	0.7963	0.9537	1.0623	1.1815	1.239	1.2391
OddandEven_rep1_BW30.125_p15	0.1029	0.1052	0.1043	0.1036	0.1057	0.1042	0.1041	0.1044	0.1047	0.104	0.1045	0.1044	0.1086	0.1999	0.5392	0.7564	0.9989	1.1387	1.2482	1.2991	1.33	1.3276	1.4091	1.4693	1.5101
OddandEven_rep1_Triclosan_resistant_BW0.125_p15	0.0845	0.083	0.0825	0.0824	0.084	0.0854	0.121	0.4062	0.8138	1.163	1.3494	1.4719	1.5432	1.5839	1.6425	1.6834	1.7217	1.7528	1.7875	1.8206	1.8485	1.8914	1.9074	1.9397	1.9574
Even_rep1_zntA0.015_p15	0.0808	0.0795	0.0806	0.0891	0.1933	0.9095	1.1923	1.3831	1.4593	1.5316	1.5988	1.6721	1.7336	1.7775	1.8176	1.8376	1.8506	1.875	1.8865	1.8931	1.8928	1.9121	1.9063	1.9148	1.9117
Even_rep1_yhip0.015_p15	0.081	0.0799	0.0813	0.0887	0.18	0.9318	1.1011	1.2523	1.382	1.5155	1.6235	1.7026	1.7704	1.8333	1.8496	1.8697	1.8888	1.9081	1.9051	1.9123	1.9148	1.9413	1.9401	1.9455	1.9525
Even_rep1_phnP0.015_p15	0.1	0.0981	0.0997	0.1188	0.3648	1.1262	1.3488	1.4828	1.5575	1.6455	1.7404	1.8157	1.8449	1.8799	1.9027	1.9227	1.9386	1.9559	1.962	1.9695	1.9754	1.9896	1.9885	1.9883	1.9819
Even_rep1_uhpT0.015_p15	0.093	0.0915	0.093	0.1057	0.4031	1.0963	1.2642	1.4638	1.5604	1.6355	1.7151	1.7969	1.8277	1.8637	1.886	1.9029	1.9174	1.9355	1.948	1.9535	1.957	1.9648	1.9681	1.9789	1.9711
Even_rep1_cutC0.015_p15	0.0984	0.0961	0.0964	0.1043	0.2624	0.9822	1.1829	1.4154	1.5149	1.5815	1.6517	1.7184	1.7475	1.7701	1.7926	1.8175	1.8304	1.8509	1.8649	1.8759	1.8806	1.8939	1.8919	1.8958	1.8991
Even_rep1_cstA0.015_p15	0.0915	0.0933	0.0933	0.1044	0.3064	0.9447	1.1102	1.3042	1.4288	1.5497	1.6607	1.782	1.8042	1.8553	1.8822	1.905	1.9308	1.9545	1.965	1.9688	1.9772	1.9909	1.9962	1.9915	1.9913
Even_rep1_yjjQ0.015_p15	0.082	0.0835	0.0841	0.0986	0.4383	1.0056	1.2778	1.5012	1.5783	1.6276	1.692	1.762	1.813	1.8523	1.8669	1.8867	1.9047	1.9207	1.9311	1.9373	1.9385	1.9527	1.9576	1.9606	1.958
Even_rep1_yjgL0.015_p15	0.0844	0.0861	0.0869	0.1007	0.4332	1.0234	1.3315	1.4895	1.565	1.6385	1.7072	1.7918	1.8253	1.8635	1.8786	1.9016	1.9187	1.9299	1.9431	1.9539	1.9574	1.9753	1.9745	1.9729	1.9727
Even_rep1_glpT0.015_p15	0.0883	0.0891	0.0905	0.1012	0.343	0.9559	1.2449	1.4504	1.5354	1.6074	1.6739	1.753	1.8067	1.8384	1.8649	1.8847	1.9088	1.9243	1.9379	1.9516	1.954	1.9724	1.9772	1.975	1.9708
Even_rep1_mcrC0.015_p15	0.0823	0.0823	0.0832	0.0935	0.2076	0.8754	1.1462	1.3467	1.45	1.5492	1.6544	1.7616	1.7825	1.8432	1.8734	1.8892	1.9126	1.9365	1.9416	1.952	1.9566	1.9696	1.9732	1.9795	1.9739
OddandEven_rep1_BW10.015_p15	0.0828	0.083	0.0848	0.0986	0.4168	0.9155	1.1813	1.3462	1.4323	1.4892	1.5521	1.6169	1.6529	1.7144	1.746	1.7702	1.7996	1.8277	1.8327	1.8364	1.8406	1.8515	1.8481	1.8528	1.8505
OddandEven_rep1_BW20.015_p15	0.0828	0.0831	0.084	0.0978	0.4516	0.9387	1.1919	1.3284	1.4353	1.5027	1.5748	1.6351	1.6922	1.7457	1.7782	1.8106	1.8377	1.8727	1.8723	1.8774	1.8741	1.8852	1.8828	1.8815	1.8763
OddandEven_rep1_BW30.015_p15	0.077	0.0769	0.078	0.0944	0.5179	1.0804	1.3165	1.4107	1.4993	1.5622	1.6164	1.6692	1.7076	1.7592	1.7858	1.8079	1.8228	1.8439	1.8716	1.8856	1.8734	1.8875	1.8852	1.8843	1.8791
OddandEven_rep1_Triclosan_resistant_BW0.015_p15	0.0836	0.0823	0.0837	0.0917	0.1742	0.9638	1.1926	1.2909	1.3919	1.4637	1.5362	1.6042	1.6352	1.6867	1.6918	1.7047	1.7188	1.7454	1.7527	1.7694	1.7871	1.8223	1.8205	1.8236	1.8244
Even_rep1_zntA_p15	0.076	0.0776	0.0791	0.0869	0.1864	0.8517	1.1832	1.3805	1.471	1.5458	1.6214	1.7052	1.751	1.7857	1.806	1.828	1.8388	1.8612	1.8802	1.8906	1.8994	1.9219	1.9228	1.9301	1.9285
Even_rep1_yhip_p15	0.0861	0.0863	0.0864	0.0933	0.2022	0.9385	1.1378	1.2453	1.3764	1.5113	1.6266	1.7299	1.7998	1.8282	1.8602	1.8914	1.9028	1.92	1.939	1.9549	1.9628	1.9821	1.9839	1.9993	1.9964
Even_rep1_phnP_p15	0.0808	0.0816	0.0837	0.0978	0.4595	1.1289	1.3531	1.45	1.5476	1.6389	1.73	1.8279	1.8722	1.9062	1.9375	1.9664	1.9819	1.9936	1.9945	2.0021	2.0087	2.0246	2.0236	2.0323	2.0251
Even_rep1_uhpT_p15	0.086	0.0878	0.0894	0.1009	0.3687	1.0677	1.2533	1.4029	1.5307	1.6256	1.7054	1.7777	1.828	1.8722	1.9056	1.9206	1.9367	1.9528	1.9651	1.9685	1.9721	1.9811	1.9939	1.9966	1.9934
Even_rep1_cutC_p15	0.0774	0.0794	0.0824	0.0919	0.1951	0.9457	1.1129	1.3192	1.4325	1.5225	1.5965	1.6583	1.7022	1.7532	1.7785	1.8022	1.8196	1.8293	1.8449	1.857	1.865	1.8741	1.8829	1.8911	1.891
Even_rep1_cstA_p15	0.0739	0.0758	0.0764	0.0844	0.1849	0.8532	1.0052	1.1664	1.3266	1.4684	1.5884	1.6608	1.7147	1.761	1.7952	1.8163	1.8407	1.8637	1.8702	1.8834	1.8888	1.9027	1.9121	1.9208	1.9226
Even_rep1_yjjQ_p15	0.084	0.0872	0.0874	0.0941	0.1643	0.9036	1.2342	1.4496	1.5265	1.5886	1.6577	1.7228	1.7812	1.8095	1.842	1.8543	1.8689	1.8944	1.9027	1.9193	1.9222	1.9349	1.9405	1.9506	1.9483
Even_rep1_yjgL_p15	0.0808	0.0808	0.0827	0.0916	0.1837	0.9726	1.2777	1.4277	1.5107	1.5869	1.6662	1.7198	1.754	1.7819	1.8072	1.833	1.8479	1.8658	1.8755	1.8891	1.8951	1.9035	1.9057	1.9121	1.9073
Even_rep1_glpT_p15	0.0916	0.0912	0.092	0.0991	0.183	0.926	1.2208	1.4212	1.5019	1.5752	1.6514	1.716	1.7682	1.8001	1.8268	1.846	1.8675	1.8882	1.9058	1.9172	1.9248	1.9408	1.945	1.9465	1.9362
Even_rep1_mcrC_p15	0.0881	0.0905	0.0913	0.0989	0.1783	0.8179	1.1318	1.2541	1.3817	1.5034	1.6129	1.7245	1.8037	1.8442	1.8833	1.9011	1.9198	1.9434	1.9523	1.971	1.9751	1.9887	2.0035	2.0123	2.0022
OddandEven_rep1_BW1_p15	0.0766	0.0786	0.0788	0.0871	0.2674	0.9414	1.2082	1.3521	1.4449	1.5108	1.56	1.6064	1.6478	1.7087	1.728	1.7536	1.7729	1.8	1.8126	1.82	1.8211	1.8373	1.8434	1.8433	1.8402
OddandEven_rep1_BW2_p15	0.0815	0.0829	0.0839	0.0966	0.3318	1.0219	1.2661	1.3919	1.484	1.5531	1.6197	1.6699	1.7147	1.778	1.8122	1.838	1.8514	1.8703	1.8725	1.8846	1.8893	1.9014	1.9067	1.9093	1.9075
OddandEven_rep1_BW3_p15	0.0792	0.0808	0.0813	0.0926	0.3409	1.036	1.2916	1.4054	1.49	1.5548	1.6123	1.6631	1.7031	1.7546	1.7964	1.8326	1.8507	1.8704	1.8821	1.8916	1.8985	1.9077	1.9132	1.9186	1.9132
OddandEven_rep1_Triclosan_resistant_BW_p15	0.0813	0.0844	0.0858	0.0955	0.1961	0.9672	1.2633	1.3993	1.4967	1.5596	1.6195	1.6784	1.7142	1.7581	1.7865	1.8224	1.8451	1.8702	1.8648	1.8972	1.8989	1.9126	1.919	1.923	1.9276
Odd_rep2_soxR0.5_p8	0.1211	0.1177	0.115	0.1144	0.1141	0.1132	0.1133	0.1123	0.1116	0.1112	0.1109	0.1107	0.1099	0.11	0.1101	0.1086	0.1079	0.1061	0.1054	0.1023	0.0987	0.0997	0.1008	0.1024	0.1032
Odd_rep2_fadR0.5_p8	0.1283	0.1159	0.1123	0.1115	0.1108	0.1098	0.1096	0.1078	0.1073	0.1066	0.1064	0.1061	0.1059	0.1055	0.1051	0.1046	0.1033	0.1032	0.1028	0.1025	0.1017	0.1019	0.1016	0.1009	0.1013
Odd_rep2_frdD0.5_p8	0.1212	0.1082	0.105	0.1037	0.103	0.1018	0.1015	0.101	0.1004	0.0997	0.0998	0.0994	0.0989	0.0988	0.0985	0.0981	0.0976	0.0971	0.097	0.0964	0.0964	0.0971	0.0961	0.096	0.096
Odd_rep2_nuoG0.5_p8	0.1191	0.105	0.1017	0.1005	0.0997	0.0987	0.0986	0.0979	0.0975	0.0969	0.0971	0.0965	0.0963	0.0961	0.0955	0.0951	0.095	0.0946	0.0944	0.0941	0.0937	0.0937	0.0934	0.093	0.0931
Odd_rep2_rbsB0.5_p8	0.13	0.1157	0.1121	0.1103	0.1094	0.1082	0.1075	0.1065	0.1062	0.1056	0.1051	0.1045	0.1042	0.104	0.1037	0.1031	0.1028	0.1026	0.1019	0.1014	0.1016	0.1015	0.1012	0.1004	0.1008
Odd_rep2_ompF0.5_p8	0.1159	0.104	0.1009	0.1001	0.0995	0.0983	0.0978	0.0971	0.0962	0.0961	0.0962	0.0958	0.095	0.0952	0.0951	0.0942	0.0941	0.0938	0.0934	0.0934	0.0937	0.0933	0.0932	0.0921	0.0929
Odd_rep2_fadL0.5_p8	0.1128	0.1019	0.0988	0.0976	0.0979	0.0962	0.0964	0.0951	0.0948	0.0945	0.0942	0.0939	0.0935	0.0937	0.0933	0.0927	0.092	0.0922	0.0915	0.0914	0.0916	0.0918	0.0913	0.0909	0.0912
Odd_rep2_lon0.5_p8	0.122	0.1082	0.1046	0.1033	0.1032	0.1006	0.1008	0.1001	0.0995	0.0984	0.0988	0.0987	0.0982	0.098	0.0977	0.0972	0.0965	0.096	0.0961	0.0952	0.0954	0.0954	0.0952	0.0943	0.0949
Odd_rep2_prc0.5_p8	0.1339	0.1169	0.1124	0.1115	0.128	0.1184	0.1263	0.1179	0.111	0.1132	0.1039	0.1033	0.103	0.1033	0.1074	0.1095	0.1024	0.1069	0.1002	0.1001	0.0999	0.1003	0.0989	0.0988	0.0984
Odd_rep2_mrcA0.5_p8	0.1218	0.1094	0.106	0.1047	0.1034	0.1022	0.1018	0.1013	0.1006	0.1003	0.1003	0.1	0.0994	0.0994	0.0992	0.0984	0.0979	0.0975	0.0976	0.097	0.0967	0.0977	0.0968	0.0961	0.0963
Odd_rep2_yehK0.5_p8	0.1221	0.1091	0.1058	0.1056	0.1039	0.1026	0.1026	0.1016	0.1008	0.1	0.1008	0.1006	0.1	0.0998	0.0989	0.0989	0.0982	0.0979	0.098	0.0977	0.0971	0.0978	0.0975	0.0968	0.0973
Odd_rep2_ybfQ0.5_p8	0.1188	0.1073	0.1039	0.1023	0.102	0.1017	0.1011	0.1	0.1002	0.0994	0.0991	0.0987	0.0986	0.0978	0.0976	0.0976	0.0971	0.0969	0.0969	0.0966	0.0956	0.0958	0.0952	0.0948	0.0952
Odd_rep2_truD0.5_p8	0.1238	0.1129	0.1099	0.1092	0.1103	0.1084	0.1102	0.1074	0.1059	0.1057	0.1044	0.1042	0.1053	0.1052	0.1049	0.1032	0.103	0.1026	0.1016	0.1018	0.1015	0.1014	0.1009	0.1009	0.101
Odd_rep2_mprA0.5_p8	0.121	0.1098	0.1069	0.1052	0.1049	0.104	0.1037	0.1027	0.1023	0.1018	0.1017	0.101	0.1012	0.1016	0.1015	0.101	0.1007	0.0999	0.0993	0.0996	0.0993	0.0996	0.0981	0.0977	0.0987
Odd_rep2_ubiF0.5_p8	0.1173	0.1054	0.1028	0.101	0.1005	0.0998	0.0996	0.0988	0.098	0.0978	0.0981	0.097	0.097	0.0965	0.0966	0.0962	0.0955	0.0953	0.0953	0.0944	0.0941	0.0949	0.0938	0.0936	0.0942
Odd_rep2_ybeX0.5_p8	0.1196	0.1079	0.1054	0.104	0.1038	0.1029	0.1022	0.1017	0.1012	0.1007	0.1008	0.1005	0.1005	0.0998	0.0997	0.0989	0.0987	0.098	0.0976	0.0974	0.0966	0.0975	0.0965	0.0965	0.0966
Odd_rep2_rep0.5_p8	0.11	0.099	0.0971	0.0953	0.0945	0.0939	0.0938	0.0931	0.0926	0.0925	0.0922	0.0918	0.0918	0.0916	0.091	0.0906	0.0903	0.09	0.0899	0.0902	0.089	0.089	0.0893	0.0891	0.089
Odd_rep2_fadD0.5_p8	0.1087	0.0973	0.0952	0.0934	0.0933	0.0923	0.0919	0.0917	0.0912	0.0906	0.0905	0.0903	0.0898	0.0897	0.0894	0.0888	0.0886	0.0887	0.0885	0.0883	0.0878	0.0881	0.088	0.0877	0.0877
Odd_rep2_ydjO0.5_p8	0.1096	0.0986	0.0966	0.0951	0.0944	0.0939	0.0935	0.093	0.0927	0.0924	0.0922	0.0916	0.0921	0.0916	0.0915	0.0907	0.0902	0.0903	0.09	0.0893	0.0893	0.0896	0.0893	0.0889	0.0891
Odd_rep2_yedN0.5_p8	0.113	0.102	0.0988	0.0978	0.097	0.0963	0.0956	0.0952	0.0949	0.0948	0.0945	0.0941	0.0937	0.0939	0.0937	0.0927	0.0925	0.0924	0.092	0.0919	0.0921	0.092	0.0918	0.0918	0.0913
Odd_rep2_yhbJ0.5_p8	0.1118	0.1004	0.0981	0.0967	0.0966	0.0957	0.0948	0.0946	0.0944	0.0942	0.0939	0.094	0.0937	0.0931	0.0927	0.0926	0.0917	0.092	0.0914	0.0915	0.091	0.0916	0.0917	0.091	0.0909
Odd_rep2_BW10.5_p8	0.1116	0.1015	0.0991	0.0978	0.0972	0.0964	0.0961	0.0954	0.095	0.0949	0.0946	0.0946	0.0944	0.0937	0.0937	0.0933	0.093	0.0927	0.0926	0.0922	0.0922	0.0927	0.0917	0.0916	0.092
Odd_rep2_BW20.5_p8	0.1126	0.1016	0.0992	0.0977	0.097	0.0964	0.0954	0.0954	0.0945	0.0943	0.0944	0.0941	0.0939	0.0934	0.0928	0.0928	0.0926	0.0927	0.0924	0.0927	0.092	0.0931	0.0923	0.0918	0.0913
Odd_rep2_Tric-resistant0.5_p8	0.1098	0.0973	0.0947	0.0936	0.0933	0.0946	0.0971	0.1023	0.116	0.1531	0.2099	0.2881	0.4013	0.5349	0.8863	1.1487	1.3214	1.4498	1.5442	1.618	1.6794	1.7336	1.779	1.8101	1.842
Odd_rep2_soxR0.125_p8	0.1164	0.1056	0.1027	0.1012	0.1006	0.0999	0.0993	0.0985	0.0984	0.0982	0.098	0.1054	0.1847	0.3147	0.7154	1.0561	1.2949	1.4476	1.5538	1.6334	1.6938	1.763	1.8303	1.8955	1.9491
Odd_rep2_fadR0.125_p8	0.1126	0.1026	0.0999	0.0987	0.0986	0.0981	0.0987	0.1013	0.1141	0.1951	0.3896	0.6353	0.7824	0.9569	1.1481	1.3419	1.439	1.5057	1.5812	1.6296	1.6902	1.7281	1.7737	1.809	1.8394
Odd_rep2_frdD0.125_p8	0.1167	0.1056	0.1031	0.1019	0.1008	0.1016	0.1049	0.1517	0.3505	0.5664	0.7891	1.1291	1.3628	1.4735	1.5528	1.6166	1.6788	1.7275	1.7786	1.8125	1.842	1.8694	1.9003	1.9153	1.9369
Odd_rep2_nuoG0.125_p8	0.1145	0.1048	0.1027	0.1013	0.1009	0.1009	0.1015	0.1054	0.1257	0.1995	0.3752	0.5811	0.8726	1.1067	1.3345	1.4846	1.5874	1.6509	1.7189	1.7687	1.8139	1.8541	1.8997	1.9313	1.9685
Odd_rep2_rbsB0.125_p8	0.1142	0.1049	0.1023	0.1007	0.1002	0.1013	0.1	0.0993	0.0994	0.1034	0.1191	0.1814	0.3194	0.5107	0.6842	0.8638	1.1101	1.2307	1.3207	1.4817	1.5948	1.6471	1.6978	1.7539	1.7968
Odd_rep2_ompF0.125_p8	0.115	0.1052	0.1035	0.1016	0.1014	0.102	0.1012	0.1003	0.1001	0.0991	0.0988	0.0987	0.1055	0.1383	0.2207	0.3421	0.5042	0.7046	0.8989	1.1023	1.3431	1.42	1.5201	1.6303	1.7003
Odd_rep2_fadL0.125_p8	0.109	0.0995	0.0973	0.0956	0.095	0.0957	0.0965	0.099	0.1299	0.2652	0.4321	0.579	0.8445	0.8165	0.9185	1.229	1.3874	1.5286	1.6167	1.6778	1.7326	1.7639	1.8038	1.8367	1.8849
Odd_rep2_lon0.125_p8	0.1143	0.1065	0.1042	0.1029	0.1031	0.1064	0.1237	0.21	0.4044	0.788	1.172	1.3516	1.4685	1.5814	1.6796	1.762	1.8283	1.8761	1.909	1.9316	1.9547	1.9572	1.972	1.9806	1.996
Odd_rep2_prc0.125_p8	0.1168	0.1066	0.1045	0.1026	0.1021	0.1015	0.1007	0.1006	0.1496	0.358	0.5576	0.7619	0.8972	1.1063	1.3178	1.4565	1.5578	1.6573	1.7503	1.827	1.8694	1.897	1.9336	1.9588	1.9671
Odd_rep2_mrcA0.125_p8	0.1103	0.1012	0.0997	0.0983	0.0969	0.0965	0.0962	0.096	0.1007	0.1412	0.298	0.342	0.5276	0.75	1.1595	1.3942	1.5235	1.613	1.6869	1.7557	1.8348	1.8856	1.9556	1.9903	2.0043
Odd_rep2_yehK0.125_p8	0.1092	0.0998	0.0967	0.0947	0.0941	0.0945	0.0936	0.094	0.0929	0.0926	0.0941	0.1192	0.1767	0.3131	0.546	1.037	1.3129	1.6119	1.6918	1.7546	1.8236	1.8813	1.9556	2.0014	2.0192
Odd_rep2_ybfQ0.125_p8	0.1051	0.0946	0.0921	0.0906	0.09	0.0896	0.0889	0.0884	0.0885	0.0879	0.0882	0.088	0.0899	0.0948	0.1143	0.1823	0.3489	1.0045	1.3149	1.4699	1.5884	1.6699	1.7693	1.843	1.8937
Odd_rep2_truD0.125_p8	0.1127	0.1026	0.0998	0.099	0.0984	0.1052	0.1454	0.3082	0.482	0.8547	1.1235	1.3377	1.465	1.5475	1.6138	1.6666	1.7154	1.76	1.8088	1.8497	1.8937	1.9319	1.9748	1.9968	2.0062
Odd_rep2_mprA0.125_p8	0.1147	0.1038	0.1014	0.1002	0.0999	0.0987	0.0983	0.0978	0.0976	0.0972	0.0972	0.0966	0.0966	0.0962	0.0957	0.0956	0.0954	0.0955	0.095	0.0949	0.0947	0.0948	0.094	0.0937	0.0939
Odd_rep2_ubiF0.125_p8	0.1161	0.1061	0.1037	0.1028	0.1022	0.1017	0.1014	0.1103	0.3028	0.5234	0.6999	1.0627	1.2734	1.3965	1.4875	1.5166	1.543	1.58	1.618	1.6616	1.6935	1.7348	1.7751	1.799	1.8266
Odd_rep2_ybeX0.125_p8	0.1182	0.1084	0.1062	0.1055	0.1052	0.1044	0.1047	0.1035	0.1033	0.1036	0.1275	0.2475	0.4092	0.6564	0.852	1.125	1.4116	1.5716	1.6747	1.7364	1.7878	1.8241	1.8734	1.9123	1.9419
Odd_rep2_rep0.125_p8	0.112	0.1016	0.0997	0.0987	0.0983	0.0979	0.0981	0.0971	0.097	0.096	0.096	0.0959	0.0954	0.0946	0.0949	0.0944	0.0938	0.0932	0.0926	0.0925	0.092	0.0922	0.0919	0.0917	0.092
Odd_rep2_fadD0.125_p8	0.1121	0.1029	0.101	0.0999	0.0995	0.0995	0.1001	0.0986	0.0988	0.0985	0.0981	0.0984	0.1032	0.1374	0.2141	0.3361	0.4264	0.6329	0.8292	0.996	1.0079	1.0798	1.1533	1.1879	1.3147
Odd_rep2_ydjO0.125_p8	0.109	0.1	0.0974	0.0961	0.0966	0.0965	0.0967	0.1065	0.2135	0.4201	0.4843	0.5983	0.8887	1.1836	1.33	1.4333	1.5264	1.6032	1.6718	1.7366	1.794	1.8369	1.8837	1.9168	1.9396
Odd_rep2_yedN0.125_p8	0.114	0.1039	0.1011	0.0998	0.0997	0.1005	0.1062	0.131	0.2172	0.3326	0.6018	1.1217	1.3651	1.4997	1.5936	1.6656	1.7284	1.7895	1.8445	1.8825	1.923	1.9518	1.9946	2.0205	2.0341
Odd_rep2_yhbJ0.125_p8	0.1146	0.104	0.1018	0.1005	0.102	0.1131	0.1654	0.3685	0.8346	1.2083	1.4567	1.5994	1.6795	1.743	1.7968	1.8568	1.901	1.9614	2.0045	2.0407	2.0667	2.0843	2.1026	2.1247	2.1221
Odd_rep2_BW10.125_p8	0.111	0.1009	0.0985	0.097	0.0965	0.0958	0.0954	0.0948	0.0946	0.0943	0.0941	0.0935	0.0935	0.0973	0.1324	0.3251	0.7276	0.9931	1.2081	1.3802	1.5274	1.6045	1.6688	1.7151	1.7575
Odd_rep2_BW20.125_p8	0.1096	0.099	0.096	0.0949	0.0947	0.0939	0.0934	0.0928	0.0925	0.0918	0.0918	0.092	0.0912	0.0907	0.091	0.0908	0.0899	0.0897	0.0895	0.0893	0.0892	0.0898	0.0893	0.0884	0.0891
Odd_rep2_Tric-resistant0.125_p8	0.1036	0.0942	0.0916	0.0904	0.0898	0.0915	0.1006	0.1369	0.4555	0.7146	1.2159	1.4828	1.6271	1.6898	1.7334	1.7702	1.8088	1.8485	1.8664	1.8978	1.9187	1.9335	1.9629	1.9785	1.9921
Odd_rep2_soxR0.015_p8	0.1181	0.1076	0.105	0.1087	0.1541	0.4872	1.0006	1.3907	1.5601	1.6573	1.7448	1.8175	1.88	1.9313	1.961	1.9936	1.9959	2.016	2.025	2.04	2.0537	2.0659	2.0835	2.0923	2.0991
Odd_rep2_fadR0.015_p8	0.1176	0.1078	0.1053	0.1073	0.1382	0.8058	1.2581	1.5125	1.6202	1.6982	1.7683	1.8343	1.9074	1.9727	2.0163	2.0381	2.0476	2.0601	2.0807	2.0905	2.1027	2.1029	2.1243	2.1205	2.1237
Odd_rep2_frdD0.015_p8	0.1165	0.1061	0.1046	0.11	0.1769	0.722	1.1944	1.4635	1.5584	1.6524	1.7421	1.8027	1.8643	1.9115	1.9347	1.9556	1.9723	1.9934	2.0113	2.0253	2.0418	2.0426	2.0599	2.0649	2.0671
Odd_rep2_nuoG0.015_p8	0.1145	0.1058	0.1047	0.1113	0.2264	0.7598	1.1477	1.5153	1.6174	1.6908	1.751	1.8131	1.8602	1.9053	1.9482	1.9927	2.0092	2.0168	2.031	2.0412	2.0598	2.0579	2.0819	2.0788	2.0809
Odd_rep2_rbsB0.015_p8	0.1147	0.1048	0.1033	0.1075	0.1624	0.5148	1.1371	1.3813	1.4885	1.5819	1.6688	1.7373	1.8271	1.8456	1.8788	1.8966	1.915	1.9296	1.9472	1.9622	1.9777	1.9816	1.9996	2.0006	2.0016
Odd_rep2_ompF0.015_p8	0.1218	0.1118	0.1092	0.1097	0.1244	0.1804	0.2894	0.482	0.9357	1.3124	1.5317	1.709	1.8288	1.8795	1.9443	1.9761	1.9909	2.0085	2.0321	2.046	2.0587	2.0633	2.0819	2.0864	2.0998
Odd_rep2_fadL0.015_p8	0.1103	0.1008	0.0994	0.103	0.1593	0.3582	0.9978	1.322	1.4976	1.5999	1.6902	1.753	1.8025	1.8606	1.9085	1.9529	1.9581	1.9773	1.9898	1.993	2.005	1.9987	2.0128	2.01	2.0156
Odd_rep2_lon0.015_p8	0.1172	0.1074	0.1052	0.1059	0.1171	0.2643	0.818	1.355	1.5685	1.6591	1.7562	1.8344	1.9062	1.9637	1.9943	2.0214	2.043	2.0645	2.0668	2.0738	2.0885	2.0919	2.1051	2.102	2.111
Odd_rep2_prc0.015_p8	0.1086	0.0995	0.0982	0.1023	0.2074	0.5234	1.063	1.3853	1.5042	1.5913	1.6735	1.7291	1.7711	1.8192	1.8533	1.8857	1.9043	1.9238	1.9351	1.946	1.9511	1.9625	1.972	1.9832	1.984
Odd_rep2_mrcA0.015_p8	0.1124	0.1021	0.1001	0.1024	0.1667	0.5735	1.1438	1.5205	1.6182	1.6981	1.7756	1.84	1.912	1.9479	1.9785	2.0023	2.0056	2.0208	2.0354	2.0485	2.0538	2.0722	2.081	2.0858	2.0878
Odd_rep2_yehK0.015_p8	0.1104	0.1002	0.0985	0.1007	0.1359	0.3061	0.854	1.1522	1.3163	1.4176	1.5083	1.5857	1.6479	1.7096	1.7617	1.8035	1.8306	1.8509	1.8684	1.8818	1.8945	1.9097	1.9286	1.9364	1.9456
Odd_rep2_ybfQ0.015_p8	0.1097	0.1002	0.1	0.1003	0.118	0.2169	0.3361	0.6247	1.2322	1.513	1.66	1.7609	1.8395	1.8779	1.9377	1.9675	1.9633	1.9823	1.9915	2.0035	2.0181	2.0226	2.0411	2.0469	2.0474
Odd_rep2_truD0.015_p8	0.1165	0.1059	0.104	0.1076	0.178	0.7995	1.1009	1.5143	1.6116	1.6905	1.783	1.8555	1.9214	1.9541	1.9757	2.003	2.0212	2.0386	2.0487	2.0648	2.0728	2.0864	2.1097	2.1147	2.1212
Odd_rep2_mprA0.015_p8	0.1164	0.1073	0.106	0.1111	0.1979	0.8174	1.095	1.3709	1.4665	1.5605	1.6595	1.7485	1.8011	1.8252	1.8523	1.8804	1.912	1.9307	1.949	1.9648	1.9745	1.9846	1.999	2.0061	2.0079
Odd_rep2_ubiF0.015_p8	0.1156	0.1059	0.1036	0.1058	0.1353	0.326	0.6414	1.0049	1.232	1.3441	1.449	1.5587	1.6583	1.7426	1.8081	1.8439	1.8665	1.9002	1.9246	1.9412	1.954	1.9662	1.9841	1.9896	1.9998
Odd_rep2_ybeX0.015_p8	0.1143	0.1056	0.1041	0.1073	0.1481	0.3024	0.9754	1.3275	1.5284	1.6288	1.719	1.7961	1.8524	1.9105	1.9569	1.9823	1.9935	2.0135	2.0306	2.0416	2.0472	2.0485	2.0723	2.083	2.0909
Odd_rep2_rep0.015_p8	0.1148	0.1048	0.1035	0.1093	0.1949	0.4486	1.126	1.4509	1.582	1.6636	1.7522	1.816	1.8767	1.9347	1.9824	2.0012	2.0128	2.023	2.0338	2.041	2.0539	2.0516	2.0678	2.0795	2.08
Odd_rep2_fadD0.015_p8	0.1118	0.1027	0.101	0.1035	0.1425	0.3019	1.0883	1.4078	1.5344	1.6251	1.7105	1.7792	1.8476	1.9085	1.9453	1.9687	1.9859	2.0032	2.0117	2.021	2.0245	2.0293	2.0491	2.05	2.052
Odd_rep2_ydjO0.015_p8	0.1118	0.1037	0.1026	0.1065	0.1751	0.5511	0.8237	1.564	1.6421	1.693	1.7445	1.793	1.8423	1.8807	1.9244	1.9662	1.9845	2.0007	2.0122	2.0242	2.0372	2.037	2.0563	2.0657	2.0648
Odd_rep2_yedN0.015_p8	0.1123	0.1028	0.1013	0.1049	0.1454	0.3518	0.9213	1.231	1.4199	1.5219	1.6112	1.6882	1.7533	1.8092	1.8516	1.8954	1.9241	1.9485	1.968	1.977	1.9902	1.9989	2.0188	2.0281	2.026
Odd_rep2_yhbJ0.015_p8	0.1073	0.0982	0.0972	0.0995	0.1311	0.8875	1.3283	1.5673	1.6808	1.7453	1.8218	1.9018	1.958	2.0017	2.0286	2.0509	2.0693	2.0965	2.1047	2.1201	2.1264	2.1394	2.1673	2.1687	2.1683
Odd_rep2_BW10.015_p8	0.105	0.0957	0.095	0.1022	0.1939	0.5634	1.0091	1.3151	1.4609	1.5425	1.6128	1.6742	1.7311	1.7955	1.8364	1.8754	1.901	1.9261	1.9417	1.957	1.9709	1.9788	1.9914	2	2.0095
Odd_rep2_BW20.015_p8	0.112	0.1025	0.1004	0.1049	0.1892	0.529	0.9775	1.3288	1.4834	1.5834	1.6734	1.7347	1.8005	1.8571	1.9149	1.9366	1.9572	1.9736	1.9867	2.0018	2.0016	2.0065	2.0209	2.0292	2.0326
Odd_rep2_Tric-resistant0.015_p8	0.1061	0.0966	0.0946	0.0986	0.1273	0.396	0.7866	1.24	1.4379	1.5452	1.6437	1.7141	1.7673	1.8194	1.861	1.9125	1.9509	1.981	1.9873	2.0034	2.0152	2.0242	2.0325	2.0406	2.0459
Odd_rep2_soxR_p8	0.1115	0.1001	0.0981	0.1014	0.1667	0.6623	0.9529	1.4383	1.5831	1.6624	1.7487	1.8208	1.8886	1.9207	1.947	1.9727	1.9934	2.004	2.023	2.0343	2.041	2.0514	2.0758	2.0792	2.0856
Odd_rep2_fadR_p8	0.109	0.0987	0.0964	0.0988	0.1326	0.6619	1.222	1.4626	1.5691	1.6476	1.7211	1.7938	1.8645	1.9213	1.9437	1.9699	1.9886	2.0082	2.0207	2.0347	2.0411	2.0508	2.0675	2.0771	2.081
Odd_rep2_frdD_p8	0.1125	0.1026	0.1006	0.1041	0.1531	0.7312	1.1727	1.4435	1.559	1.6491	1.7326	1.8047	1.8591	1.8904	1.9175	1.9422	1.9554	1.9804	1.9981	2.0102	2.0256	2.0333	2.0467	2.05	2.0511
Odd_rep2_nuoG_p8	0.1128	0.1028	0.1009	0.1062	0.1876	0.5293	1.1323	1.4489	1.5799	1.6629	1.7268	1.7904	1.8424	1.8917	1.9407	1.9857	1.9974	2.0083	2.0283	2.0383	2.0441	2.0491	2.0649	2.067	2.0693
Odd_rep2_rbsB_p8	0.1097	0.1007	0.0988	0.1003	0.1294	0.3297	1.0317	1.2901	1.4042	1.5087	1.6023	1.6841	1.7473	1.7918	1.8221	1.8388	1.8669	1.8872	1.9087	1.9255	1.94	1.946	1.9663	1.9644	1.9687
Odd_rep2_ompF_p8	0.1082	0.0993	0.097	0.0976	0.1084	0.1653	0.2507	0.401	0.7328	1.1345	1.3908	1.5599	1.6792	1.7519	1.8112	1.8499	1.8792	1.9125	1.9343	1.9551	1.9738	1.9847	2.0089	2.0109	2.02
Odd_rep2_fadL_p8	0.1026	0.0928	0.0916	0.0931	0.1264	0.2692	0.8943	1.2523	1.4436	1.5662	1.6633	1.7332	1.7999	1.8515	1.901	1.9316	1.951	1.9641	1.9793	1.9865	1.999	1.993	2.0097	2.0116	2.0207
Odd_rep2_lon_p8	0.1026	0.0949	0.093	0.0954	0.1216	0.6691	0.9678	1.2888	1.4768	1.5933	1.6991	1.7858	1.8624	1.9045	1.938	1.9639	1.9753	1.9974	2.0099	2.0162	2.0329	2.034	2.0652	2.0654	2.0722
Odd_rep2_prc_p8	0.1048	0.0957	0.0944	0.0967	0.1501	0.4389	0.9929	1.3887	1.5285	1.6335	1.6928	1.7549	1.8029	1.8462	1.8794	1.9054	1.9191	1.9305	1.9415	1.9478	1.9555	1.9647	1.9813	1.9866	1.9973
Odd_rep2_mrcA_p8	0.1038	0.0946	0.0929	0.0952	0.1351	0.6167	1.0399	1.4162	1.538	1.6198	1.7072	1.7796	1.8409	1.885	1.9093	1.9292	1.9501	1.971	1.984	1.9916	2.0075	2.0176	2.0311	2.0403	2.0463
Odd_rep2_yehK_p8	0.104	0.0949	0.093	0.0945	0.1127	0.2979	0.858	1.1111	1.3202	1.4296	1.5082	1.5852	1.6457	1.7014	1.7565	1.7905	1.8172	1.834	1.8536	1.8663	1.8809	1.8917	1.9154	1.9186	1.9342
Odd_rep2_ybfQ_p8	0.1059	0.0956	0.093	0.0947	0.113	0.1978	0.3342	0.5927	1.0328	1.3626	1.5191	1.6439	1.717	1.7722	1.8109	1.8442	1.8773	1.9028	1.9162	1.9364	1.953	1.9592	1.9769	1.9835	2.0014
Odd_rep2_truD_p8	0.1077	0.0983	0.0962	0.0994	0.1431	0.6234	1.0214	1.3885	1.4987	1.6007	1.706	1.7929	1.8571	1.8948	1.9254	1.9565	1.9751	1.9933	2.0093	2.0211	2.0361	2.0472	2.0656	2.0766	2.0851
Odd_rep2_mprA_p8	0.1095	0.1001	0.0984	0.1	0.1306	0.3903	0.9852	1.2592	1.3944	1.5019	1.6164	1.715	1.7871	1.8182	1.8537	1.8781	1.9075	1.9301	1.9479	1.958	1.9681	1.9778	1.9959	1.9968	2.0055
Odd_rep2_ubiF_p8	0.1099	0.1007	0.0979	0.0989	0.117	0.2743	0.4602	0.8771	1.1216	1.2738	1.3966	1.4989	1.5913	1.673	1.7175	1.7569	1.7909	1.8215	1.8516	1.8695	1.889	1.8935	1.9129	1.9238	1.9372
Odd_rep2_ybeX_p8	0.1155	0.1061	0.104	0.106	0.1287	0.2548	0.6947	1.2082	1.4291	1.5584	1.6556	1.7529	1.8109	1.8757	1.8967	1.9215	1.939	1.9577	1.9687	1.9771	1.9922	2.009	2.0331	2.0481	2.0595
Odd_rep2_rep_p8	0.1125	0.1034	0.1015	0.104	0.1375	0.2937	1.0202	1.376	1.5145	1.596	1.6733	1.7398	1.7983	1.8595	1.8913	1.9111	1.9344	1.9449	1.9607	1.9694	1.9842	1.9899	2.011	2.0125	2.0283
Odd_rep2_fadD_p8	0.1114	0.1016	0.0998	0.1003	0.1163	0.2149	0.9733	1.2987	1.4355	1.5498	1.6696	1.7385	1.8166	1.8591	1.8938	1.9186	1.9328	1.9491	1.9554	1.9623	1.9835	1.9855	2.0052	2.0105	2.0168
Odd_rep2_ydjO_p8	0.1055	0.0963	0.0945	0.0967	0.1147	0.2776	0.5181	1.4409	1.5814	1.6403	1.6979	1.7467	1.7828	1.827	1.8722	1.9092	1.9321	1.9525	1.9686	1.9775	1.9971	2.0028	2.024	2.0226	2.0344
Odd_rep2_yedN_p8	0.1081	0.0987	0.0963	0.0982	0.1106	0.1893	0.4585	1.1089	1.3431	1.4651	1.5623	1.6635	1.7272	1.7903	1.8347	1.8706	1.8955	1.9206	1.9377	1.9545	1.9658	1.9817	2.0035	1.9999	2.0126
Odd_rep2_yhbJ_p8	0.1043	0.0955	0.0936	0.0941	0.1084	0.6283	1.2384	1.501	1.6142	1.7009	1.7874	1.8747	1.9254	1.9662	1.9844	1.9969	2.0153	2.0341	2.0468	2.07	2.0817	2.0983	2.1178	2.1323	2.1476
Odd_rep2_BW1_p8	0.1013	0.0927	0.0901	0.0929	0.1289	0.603	1.0646	1.2921	1.4537	1.5428	1.6128	1.6748	1.7221	1.7729	1.8239	1.8529	1.8781	1.8989	1.9203	1.9372	1.9545	1.9659	1.9815	1.9852	1.9962
Odd_rep2_BW2_p8	0.1038	0.0956	0.0936	0.0955	0.1413	0.5342	1.0401	1.2498	1.4314	1.531	1.6148	1.6816	1.7345	1.7999	1.8466	1.8785	1.8957	1.9092	1.9227	1.9408	1.9611	1.9662	1.9897	1.9922	2.0068
Odd_rep2_Tric-resistant_p8	0.1081	0.0985	0.0963	0.0963	0.1126	0.4512	1.0302	1.2501	1.4583	1.5672	1.6526	1.7222	1.7744	1.8213	1.8617	1.9051	1.9505	1.9698	1.9807	2.0003	2.0154	2.0166	2.0264	2.0348	2.0438
Odd_rep2_yibA0.5_p9	0.1152	0.1091	0.1068	0.1051	0.1044	0.1038	0.1033	0.1028	0.1026	0.1025	0.1022	0.1022	0.102	0.1016	0.1018	0.1013	0.0984	0.0954	0.0943	0.0945	0.0915	0.093	0.0967	0.0979	0.0987
Odd_rep2_yjcF0.5_p9	0.1167	0.1034	0.1014	0.0995	0.0992	0.0981	0.098	0.0974	0.0968	0.0965	0.0961	0.0961	0.0958	0.0955	0.0953	0.0954	0.094	0.0926	0.0929	0.0931	0.0926	0.0925	0.0926	0.0932	0.0935
Odd_rep2_yjbI0.5_p9	0.1173	0.1034	0.1007	0.0988	0.0981	0.0977	0.0971	0.0964	0.0963	0.0961	0.0956	0.0953	0.0946	0.0944	0.0944	0.0945	0.0937	0.0932	0.0932	0.0933	0.0928	0.0933	0.0929	0.0931	0.093
Odd_rep2_yjbL0.5_p9	0.1289	0.113	0.1104	0.1088	0.1077	0.107	0.1062	0.1058	0.1053	0.1053	0.1047	0.1047	0.1046	0.1043	0.104	0.1035	0.1028	0.1021	0.1024	0.1023	0.1023	0.1022	0.1017	0.1022	0.1022
Odd_rep2_yigF0.5_p9	0.1204	0.1038	0.101	0.0995	0.0991	0.0984	0.0974	0.0972	0.0968	0.0965	0.0963	0.0959	0.0954	0.0951	0.0948	0.0948	0.0943	0.0939	0.0946	0.0945	0.0941	0.0945	0.094	0.0937	0.0935
Odd_rep2_acrB0.5_p9	0.1166	0.1011	0.0989	0.1001	0.0984	0.1093	0.1081	0.1101	0.1107	0.1055	0.1094	0.1095	0.1074	0.1061	0.1098	0.1106	0.1069	0.1079	0.1051	0.1068	0.1045	0.0922	0.1092	0.0919	0.098
Odd_rep2_aroE0.5_p9	0.1153	0.1004	0.0978	0.0962	0.0958	0.0948	0.0944	0.0934	0.0933	0.0928	0.0926	0.0922	0.0921	0.092	0.0918	0.0916	0.0911	0.0907	0.0905	0.0907	0.0905	0.0904	0.0906	0.0903	0.0903
Odd_rep2_aroD0.5_p9	0.1175	0.1012	0.0983	0.0969	0.0977	0.0963	0.0952	0.0941	0.0935	0.1077	0.1055	0.1052	0.1062	0.1063	0.105	0.1051	0.1056	0.1049	0.1083	0.1072	0.1056	0.1067	0.1064	0.1066	0.1038
Odd_rep2_aroC0.5_p9	0.1206	0.1053	0.1022	0.1006	0.1001	0.0991	0.0989	0.0983	0.0984	0.098	0.0977	0.0972	0.0961	0.0962	0.0959	0.0964	0.0953	0.0949	0.0953	0.0953	0.095	0.095	0.0951	0.0948	0.0938
Odd_rep2_fre0.5_p9	0.12	0.105	0.1021	0.1007	0.0999	0.0993	0.0985	0.0981	0.0977	0.0974	0.0974	0.0971	0.0964	0.096	0.096	0.0954	0.0955	0.0945	0.095	0.095	0.0949	0.0947	0.0946	0.0948	0.0945
Odd_rep2_sspA0.5_p9	0.1206	0.1055	0.1025	0.1012	0.1001	0.0995	0.0989	0.0979	0.0974	0.0978	0.0972	0.0969	0.0963	0.0955	0.096	0.0958	0.0955	0.0955	0.0951	0.0948	0.0949	0.0952	0.0947	0.0946	0.0945
Odd_rep2_minC0.5_p9	0.1107	0.0973	0.0945	0.0926	0.0919	0.0917	0.0907	0.0904	0.0902	0.0901	0.0894	0.0894	0.0891	0.0886	0.0886	0.0885	0.0882	0.0878	0.0878	0.0877	0.0879	0.0881	0.0876	0.0873	0.0875
Odd_rep2_gcvP0.5_p9	0.1156	0.1026	0.1	0.0985	0.0974	0.0974	0.0971	0.096	0.0955	0.0958	0.0953	0.0952	0.0948	0.0942	0.0944	0.0949	0.0942	0.0927	0.0929	0.093	0.0928	0.0927	0.0923	0.0927	0.0923
Odd_rep2_treC0.5_p9	0.1327	0.1169	0.1137	0.1127	0.1115	0.1109	0.111	0.1101	0.1093	0.1098	0.1094	0.1091	0.1087	0.1089	0.1086	0.1083	0.1074	0.1056	0.1053	0.1055	0.1048	0.1052	0.1059	0.1065	0.1065
Odd_rep2_galU0.5_p9	0.1159	0.1022	0.1004	0.0982	0.098	0.0975	0.0966	0.0962	0.0961	0.0957	0.0953	0.0948	0.0944	0.0941	0.0942	0.094	0.0929	0.0926	0.0925	0.092	0.0917	0.0924	0.0919	0.0919	0.0925
Odd_rep2_carB0.5_p9	0.1204	0.106	0.1037	0.102	0.1013	0.101	0.1004	0.0999	0.0993	0.0991	0.0987	0.0987	0.0984	0.0986	0.0978	0.0976	0.0973	0.0965	0.0963	0.0962	0.0957	0.096	0.0958	0.0964	0.0957
Odd_rep2_purL0.5_p9	0.1172	0.1037	0.1012	0.0998	0.0988	0.0981	0.0975	0.0969	0.0969	0.0964	0.0959	0.0958	0.0953	0.0952	0.0954	0.0951	0.0943	0.0936	0.0936	0.0937	0.0928	0.0932	0.0931	0.0934	0.093
Odd_rep2_creA0.5_p9	0.1219	0.1093	0.1062	0.1046	0.1042	0.1039	0.103	0.1029	0.1027	0.1019	0.1021	0.1016	0.1011	0.101	0.1008	0.1005	0.1	0.0997	0.0996	0.0998	0.0998	0.0999	0.0996	0.0993	0.0993
Odd_rep2_cyaA0.5_p9	0.1208	0.1066	0.1031	0.1012	0.1011	0.1006	0.099	0.0992	0.0989	0.0984	0.0977	0.0976	0.0969	0.0974	0.097	0.0966	0.096	0.0951	0.0949	0.0947	0.0947	0.0952	0.0948	0.0949	0.0954
Odd_rep2_sapD0.5_p9	0.1251	0.1104	0.107	0.1049	0.1048	0.1247	0.1041	0.1025	0.1143	0.1287	0.1093	0.1011	0.102	0.1005	0.1025	0.1006	0.0996	0.0994	0.1284	0.116	0.0987	0.0994	0.0986	0.0996	0.1163
Odd_rep2_psta0.5_p9	0.1203	0.1059	0.1023	0.1014	0.1007	0.1002	0.0998	0.099	0.0985	0.0981	0.0976	0.0975	0.097	0.0971	0.0971	0.0967	0.0961	0.0954	0.0953	0.0951	0.095	0.0951	0.095	0.0949	0.095
Odd_rep2_BW10.5_p9	0.118	0.1033	0.1003	0.0987	0.0984	0.098	0.0973	0.097	0.0964	0.0964	0.0956	0.0954	0.0951	0.095	0.0949	0.0952	0.0941	0.0935	0.094	0.0935	0.0935	0.0941	0.0936	0.0934	0.0941
Odd_rep2_BW20.5_p9	0.1417	0.1406	0.1351	0.1304	0.1264	0.1261	0.1246	0.1269	0.1281	0.1321	0.1257	0.1231	0.1286	0.1412	0.1415	0.1235	0.1226	0.1282	0.1289	0.1278	0.1199	0.1264	0.1462	0.1203	0.1331
Odd_rep2_Triclosan_resistant_BW0.5_p9	0.1155	0.1018	0.0988	0.097	0.097	0.1014	0.1081	0.125	0.1663	0.2157	0.3014	0.4096	0.5076	0.8127	1.0815	1.2469	1.4036	1.4965	1.5825	1.6569	1.732	1.7793	1.8065	1.8421	1.87
Odd_rep2_yibA0.125_p9	0.1218	0.1103	0.108	0.1063	0.1067	0.105	0.1054	0.1083	0.1197	0.1499	0.2464	0.348	0.5081	0.7109	1.175	1.4365	1.5134	1.5903	1.6598	1.7262	1.7803	1.8267	1.875	1.9315	1.9499
Odd_rep2_yjcF0.125_p9	0.1209	0.1067	0.1034	0.1023	0.102	0.1024	0.1284	0.3379	0.527	0.7956	1.1812	1.3929	1.4865	1.5836	1.6669	1.7319	1.8008	1.8652	1.9207	1.9443	1.9656	1.9831	1.9971	2.013	2.0221
Odd_rep2_yjbI0.125_p9	0.1291	0.1142	0.1115	0.1108	0.1108	0.1176	0.1589	0.2823	0.6476	1.0487	1.3384	1.4637	1.5643	1.6753	1.7708	1.8559	1.9265	1.9535	1.9891	2.024	2.0297	2.0527	2.0616	2.0761	2.0861
Odd_rep2_yjbL0.125_p9	0.1656	0.1506	0.1485	0.146	0.145	0.1482	0.1624	0.2408	0.3739	0.5663	0.9635	1.2531	1.4037	1.4991	1.5766	1.6591	1.7354	1.8002	1.8686	1.9394	1.9541	1.9768	2.0001	2.0189	2.0292
Odd_rep2_yigF0.125_p9	0.1358	0.1207	0.1184	0.1175	0.1181	0.1197	0.1344	0.2454	0.4153	0.5795	0.9917	1.3071	1.4413	1.5386	1.623	1.6985	1.7688	1.8502	1.908	1.9464	1.973	1.9932	2.0105	2.0272	2.0329
Odd_rep2_acrB0.125_p9	0.1572	0.1476	0.1437	0.1433	0.1452	0.1423	0.142	0.1424	0.1402	0.1407	0.1402	0.1414	0.141	0.1385	0.1389	0.1403	0.1398	0.1381	0.1387	0.138	0.1358	0.1386	0.1394	0.1389	0.1368
Odd_rep2_aroE0.125_p9	0.1337	0.1179	0.1154	0.1143	0.114	0.1127	0.1153	0.1271	0.2466	0.4151	0.9203	1.2852	1.419	1.5009	1.5586	1.6059	1.6452	1.6871	1.7305	1.7756	1.8165	1.8455	1.8769	1.9032	1.9315
Odd_rep2_aroD0.125_p9	0.1207	0.1067	0.1048	0.1034	0.1034	0.1065	0.1208	0.1601	0.2886	0.504	0.7024	1.1763	1.3616	1.462	1.5331	1.6089	1.6665	1.7337	1.7969	1.8586	1.9163	1.9409	1.957	1.9856	2.0039
Odd_rep2_aroC0.125_p9	0.1362	0.1217	0.1191	0.1173	0.1179	0.1209	0.1336	0.1997	0.3681	0.9146	1.2316	1.4017	1.5329	1.6297	1.6874	1.7386	1.7859	1.8278	1.8668	1.9153	1.9517	1.9844	2.0138	2.0471	2.0576
Odd_rep2_fre0.125_p9	0.1336	0.1168	0.1146	0.1137	0.1145	0.111	0.1117	0.1117	0.1116	0.1365	0.2172	0.2836	0.4831	0.696	0.6062	0.7477	1.3953	1.3743	1.5498	1.679	1.7319	1.8065	1.8193	1.8361	1.8605
Odd_rep2_sspA0.125_p9	0.1233	0.1091	0.1064	0.1055	0.1045	0.1044	0.1106	0.141	0.2856	0.5322	0.8929	1.0456	1.175	1.2785	1.3838	1.4815	1.5591	1.6327	1.7131	1.7733	1.8086	1.8345	1.8513	1.8736	1.8835
Odd_rep2_minC0.125_p9	0.1175	0.1044	0.1013	0.0996	0.0992	0.1001	0.0994	0.1001	0.1123	0.1535	0.3065	0.8424	1.0469	1.1601	1.305	1.3647	1.4211	1.4735	1.5385	1.5973	1.6586	1.7248	1.7802	1.8238	1.8465
Odd_rep2_gcvP0.125_p9	0.1272	0.1128	0.1093	0.1077	0.1072	0.1067	0.1086	0.1253	0.2542	0.4238	0.6865	0.9843	1.2319	1.3955	1.5106	1.6105	1.6873	1.7615	1.8318	1.9017	1.9473	1.9667	1.99	2.0114	2.0208
Odd_rep2_treC0.125_p9	0.1322	0.1179	0.1148	0.1131	0.1123	0.1181	0.247	0.4652	0.615	0.8003	0.961	1.1297	1.2347	1.3337	1.4183	1.5143	1.6012	1.6773	1.7466	1.8017	1.855	1.897	1.9431	1.9924	2.0183
Odd_rep2_galU0.125_p9	0.119	0.1065	0.1044	0.1028	0.1022	0.1022	0.1028	0.1083	0.1331	0.2461	0.3777	0.5379	0.8316	1.0264	1.2142	1.2726	1.2722	1.3617	1.4923	1.6206	1.7164	1.8287	1.9132	1.9084	1.9402
Odd_rep2_carB0.125_p9	0.1361	0.1245	0.1215	0.1199	0.1196	0.1212	0.1306	0.1926	0.4097	0.6615	1.1468	1.3877	1.4891	1.6045	1.7043	1.772	1.8358	1.8945	1.9592	1.9749	2.0071	2.0316	2.0436	2.0494	2.0559
Odd_rep2_purL0.125_p9	0.1411	0.1301	0.1274	0.1263	0.126	0.1293	0.1582	0.2958	0.4882	0.5858	1.0333	1.3183	1.4454	1.5553	1.6325	1.7038	1.7624	1.8224	1.8811	1.9404	1.9823	2.0027	2.0181	2.0365	2.0443
Odd_rep2_creA0.125_p9	0.1312	0.1172	0.115	0.113	0.1132	0.1169	0.1449	0.2489	0.4618	0.5259	0.774	1.1763	1.3548	1.4788	1.583	1.684	1.7652	1.8482	1.8934	1.9287	1.9575	1.9763	1.9992	2.0206	2.0287
Odd_rep2_cyaA0.125_p9	0.1362	0.1222	0.1197	0.1183	0.1175	0.1177	0.1225	0.1608	0.2815	0.4339	0.7769	1.1235	1.3535	1.5016	1.5725	1.6306	1.6901	1.7438	1.7846	1.8525	1.9014	1.9475	1.9883	2.0159	2.0284
Odd_rep2_sapD0.125_p9	0.1236	0.1098	0.1076	0.1063	0.108	0.1567	0.3327	0.4761	0.81	1.1583	1.305	1.4357	1.5003	1.5825	1.6446	1.7169	1.7496	1.7838	1.8215	1.8563	1.8847	1.8984	1.9204	1.9446	1.9616
Odd_rep2_psta0.125_p9	0.1336	0.1198	0.1169	0.1154	0.1141	0.1134	0.1128	0.1121	0.1117	0.1111	0.111	0.1103	0.1103	0.1098	0.1099	0.1093	0.1079	0.1074	0.1073	0.1075	0.1067	0.1073	0.1074	0.1068	0.1076
Odd_rep2_BW10.125_p9	0.1199	0.1086	0.1069	0.1059	0.1055	0.1052	0.1124	0.3395	0.5557	0.7716	0.9803	1.1018	1.2543	1.4253	1.52	1.6153	1.6805	1.7415	1.7777	1.835	1.8847	1.9235	1.9508	1.9863	2.0119
Odd_rep2_BW20.125_p9	0.1188	0.1078	0.1056	0.1036	0.103	0.1039	0.1081	0.1141	0.1517	0.2748	0.4838	0.6696	0.8646	1.0943	1.2985	1.4422	1.5052	1.5635	1.6345	1.7251	1.7951	1.8513	1.8994	1.9578	1.9915
Odd_rep2_Triclosan_resistant_BW0.125_p9	0.1093	0.0968	0.0946	0.0929	0.0935	0.096	0.1103	0.1635	0.3662	0.7611	1.1626	1.4326	1.5649	1.6258	1.6796	1.7435	1.7888	1.8178	1.8555	1.8812	1.9024	1.9215	1.9408	1.9661	1.9798
Odd_rep2_yibA0.015_p9	0.1167	0.1041	0.1023	0.1063	0.1668	0.754	1.1576	1.3385	1.4555	1.5596	1.6411	1.7175	1.795	1.8451	1.8787	1.9082	1.9209	1.9407	1.9477	1.9794	1.9969	1.9973	2.0015	2.0163	2.0216
Odd_rep2_yjcF0.015_p9	0.1195	0.1059	0.1038	0.1104	0.1736	0.6954	1.113	1.4392	1.5399	1.6312	1.719	1.7945	1.8633	1.9135	1.9303	1.9585	1.9739	1.9813	2.0003	2.0218	2.0298	2.0345	2.0346	2.0532	2.0647
Odd_rep2_yjbI0.015_p9	0.1373	0.1242	0.1225	0.127	0.2005	0.5992	1.1024	1.4502	1.5513	1.6658	1.7498	1.8287	1.887	1.9329	1.9569	1.9883	2.0041	2.0201	2.03	2.0592	2.0632	2.0695	2.0805	2.0983	2.1065
Odd_rep2_yjbL0.015_p9	0.1325	0.1199	0.1182	0.1241	0.2508	0.6697	1.1983	1.4701	1.5793	1.6829	1.7615	1.8266	1.8728	1.9262	1.981	1.9939	2.0012	2.0132	2.033	2.0422	2.0529	2.0599	2.0625	2.0754	2.081
Odd_rep2_yigF0.015_p9	0.1308	0.1197	0.119	0.1242	0.2395	0.5998	1.1224	1.4235	1.5518	1.66	1.7564	1.863	1.8914	1.9235	1.9479	1.9713	1.9966	2.0037	2.0171	2.0362	2.0484	2.0527	2.0637	2.0775	2.0852
Odd_rep2_acrB0.015_p9	0.1261	0.1137	0.112	0.1107	0.1103	0.1119	0.1165	0.1479	0.3071	0.6908	1.2131	1.382	1.4613	1.5434	1.6204	1.7139	1.7809	1.8406	1.87	1.9029	1.9272	1.9447	1.9555	1.9786	1.9911
Odd_rep2_aroE0.015_p9	0.118	0.1059	0.1041	0.109	0.1523	0.5308	1.2469	1.4496	1.558	1.6404	1.7149	1.7723	1.8264	1.8892	1.9404	1.9644	1.9754	1.9913	1.999	2.0204	2.0286	2.0347	2.0405	2.0589	2.0606
Odd_rep2_aroD0.015_p9	0.1258	0.1137	0.112	0.1135	0.1354	0.4508	1.1353	1.3493	1.4523	1.5286	1.5983	1.6651	1.7178	1.7728	1.8262	1.8551	1.8684	1.8853	1.9016	1.9222	1.936	1.9421	1.9524	1.9705	1.9724
Odd_rep2_aroC0.015_p9	0.125	0.1118	0.1101	0.1115	0.1484	0.5286	1.2156	1.4342	1.5459	1.6235	1.688	1.7504	1.799	1.8537	1.8974	1.9508	1.9643	1.9694	1.9902	2.0103	2.0223	2.0259	2.0389	2.0521	2.0581
Odd_rep2_fre0.015_p9	0.1141	0.1021	0.1005	0.1019	0.1341	0.4708	0.8615	1.0137	1.2176	1.3315	1.4406	1.5166	1.5923	1.6679	1.7243	1.7747	1.8132	1.8474	1.8755	1.906	1.9288	1.9415	1.9609	1.9716	1.9823
Odd_rep2_sspA0.015_p9	0.1166	0.1042	0.1015	0.1022	0.1171	0.2235	0.6951	0.9168	1.2018	1.3035	1.3955	1.4844	1.5621	1.6628	1.7249	1.7641	1.787	1.8134	1.8286	1.8471	1.8615	1.8672	1.8847	1.8949	1.902
Odd_rep2_minC0.015_p9	0.1145	0.1038	0.1009	0.1014	0.1081	0.1749	0.3167	0.5627	0.968	1.1735	1.322	1.4248	1.5254	1.6308	1.6929	1.7395	1.7771	1.8081	1.8356	1.8573	1.8797	1.8908	1.9001	1.9167	1.9281
Odd_rep2_gcvP0.015_p9	0.1137	0.0998	0.098	0.1016	0.1588	0.8054	1.0779	1.364	1.5066	1.6044	1.6836	1.7538	1.8089	1.8627	1.9031	1.9358	1.9543	1.963	1.986	1.9979	2.0052	2.0092	2.0113	2.0288	2.0316
Odd_rep2_treC0.015_p9	0.1256	0.1137	0.1134	0.1181	0.2285	0.6033	0.9703	1.3063	1.4811	1.6226	1.734	1.8314	1.8946	1.9415	1.9634	1.9841	1.9894	1.9916	2.0111	2.0331	2.0437	2.0515	2.058	2.073	2.0878
Odd_rep2_galU0.015_p9	0.1189	0.1063	0.1052	0.1112	0.1747	0.4544	1.0659	1.3384	1.4606	1.5604	1.6447	1.7143	1.7699	1.824	1.8687	1.9219	1.9549	1.9609	1.9816	1.9938	2.009	2.0085	2.0214	2.0322	2.0476
Odd_rep2_carB0.015_p9	0.1164	0.1044	0.1025	0.1048	0.1354	0.3765	0.9682	1.1998	1.3626	1.5017	1.609	1.7026	1.7811	1.8402	1.8739	1.9125	1.9378	1.9543	1.9769	1.989	2.0056	2.0048	2.0178	2.0294	2.0369
Odd_rep2_purL0.015_p9	0.122	0.1098	0.1081	0.1122	0.2108	0.5954	1.1838	1.4966	1.5759	1.6595	1.7384	1.8047	1.8518	1.8999	1.9118	1.9385	1.9556	1.9689	1.9794	1.9948	2.006	2.0102	2.0189	2.0361	2.0449
Odd_rep2_creA0.015_p9	0.1246	0.1141	0.1124	0.1177	0.2412	0.5832	1.1614	1.415	1.532	1.6246	1.7031	1.7651	1.8238	1.8843	1.9338	1.9628	1.9736	1.9835	1.9965	2.0107	2.0211	2.0227	2.0313	2.0398	2.0507
Odd_rep2_cyaA0.015_p9	0.1192	0.1082	0.1074	0.1116	0.1786	0.6402	1.1805	1.4638	1.5897	1.6689	1.7377	1.7977	1.8534	1.9076	1.9472	1.9703	1.9805	1.977	1.9971	2.0111	2.0263	2.0205	2.0348	2.0461	2.0565
Odd_rep2_sapD0.015_p9	0.1189	0.1078	0.1064	0.1075	0.1282	0.2985	0.7517	1.1773	1.4355	1.5142	1.5907	1.6748	1.7458	1.8349	1.8526	1.8745	1.8779	1.8922	1.915	1.9348	1.9527	1.9656	1.9826	1.9935	2.0016
Odd_rep2_psta0.015_p9	0.1204	0.1086	0.1076	0.1086	0.1373	0.2866	0.9412	1.228	1.3556	1.4467	1.5361	1.6197	1.6791	1.7459	1.7867	1.8157	1.836	1.8591	1.8803	1.9014	1.9189	1.9287	1.943	1.9533	1.9652
Odd_rep2_BW10.015_p9	0.11	0.0984	0.097	0.1017	0.1993	0.4862	0.9852	1.2649	1.4038	1.5175	1.6061	1.6878	1.7509	1.8234	1.8801	1.9087	1.9285	1.9424	1.9591	1.9739	1.9855	1.9887	1.9974	2.0088	2.0137
Odd_rep2_BW20.015_p9	0.1175	0.1048	0.1024	0.1064	0.1645	0.4749	0.7796	1.1108	1.2777	1.3935	1.5068	1.5913	1.6709	1.7354	1.7956	1.8543	1.8828	1.9031	1.9265	1.9399	1.9535	1.9647	1.9783	1.9886	1.9917
Odd_rep2_Triclosan_resistant_BW0.015_p9	0.1296	0.1165	0.1135	0.1162	0.1429	0.5068	1.0283	1.2936	1.463	1.5465	1.6253	1.6883	1.7349	1.7895	1.8446	1.8959	1.919	1.9357	1.9598	1.9799	1.9918	1.996	2.0104	2.0126	2.0232
Odd_rep2_yibA_p9	0.114	0.1009	0.0992	0.1037	0.1642	0.7009	1.061	1.3109	1.4421	1.5398	1.6281	1.7074	1.7729	1.8111	1.8374	1.8677	1.8829	1.8978	1.9215	1.9424	1.9506	1.9582	1.9655	1.9819	1.9885
Odd_rep2_yjcF_p9	0.114	0.1023	0.1	0.105	0.1557	0.4859	1.0973	1.4381	1.5176	1.5975	1.6784	1.7585	1.8233	1.8634	1.884	1.9115	1.9277	1.9388	1.9603	1.9749	1.9861	1.9925	2.0026	2.0175	2.0282
Odd_rep2_yjbI_p9	0.1139	0.1014	0.0996	0.1013	0.1505	0.4387	0.8134	1.4076	1.5146	1.6044	1.7019	1.7823	1.8477	1.8866	1.9093	1.9428	1.9592	1.9748	1.9952	2.0111	2.0221	2.0342	2.0457	2.0594	2.0735
Odd_rep2_yjbL_p9	0.1184	0.1081	0.1061	0.1095	0.1769	0.5762	1.1546	1.4403	1.5492	1.6367	1.7121	1.7762	1.8392	1.8956	1.925	1.9595	1.9745	1.9801	1.9937	2.0127	2.0236	2.0274	2.0362	2.0526	2.0612
Odd_rep2_yigF_p9	0.1136	0.102	0.1	0.1029	0.1449	0.5652	0.9456	1.2899	1.4423	1.5642	1.6724	1.7724	1.8164	1.8572	1.8818	1.9168	1.9399	1.9522	1.9683	1.9911	2.002	2.0098	2.0213	2.0359	2.047
Odd_rep2_acrB_p9	0.1223	0.1125	0.111	0.1131	0.1568	0.4082	1.0706	1.2815	1.3945	1.4948	1.5897	1.6715	1.7427	1.7751	1.8011	1.8321	1.8448	1.8602	1.8845	1.9072	1.9257	1.9336	1.9458	1.9623	1.9667
Odd_rep2_aroE_p9	0.1213	0.1114	0.1101	0.1122	0.1569	0.6286	1.1869	1.3928	1.5195	1.6026	1.6724	1.736	1.7879	1.8444	1.8858	1.917	1.9249	1.9373	1.957	1.9733	1.9825	1.992	1.9936	2.0144	2.0131
Odd_rep2_aroD_p9	0.1424	0.1347	0.1318	0.1321	0.1542	0.6123	1.0988	1.3226	1.4492	1.5335	1.6034	1.6572	1.7156	1.772	1.8251	1.8546	1.8753	1.8881	1.9054	1.9229	1.9316	1.9493	1.9574	1.9681	1.9755
Odd_rep2_aroC_p9	0.1158	0.1025	0.101	0.1021	0.125	0.7392	1.174	1.3732	1.5227	1.6215	1.6781	1.731	1.7836	1.8372	1.8767	1.9229	1.9361	1.9508	1.9713	1.9919	2.0008	2.0097	2.0234	2.033	2.0376
Odd_rep2_fre_p9	0.1069	0.0953	0.0933	0.0945	0.1116	0.2081	0.5612	0.8782	1.1332	1.27	1.3771	1.4663	1.5482	1.6204	1.681	1.7437	1.7778	1.8177	1.8511	1.8807	1.9016	1.9219	1.9382	1.959	1.9774
Odd_rep2_sspA_p9	0.1162	0.1017	0.0998	0.0996	0.1061	0.1813	0.5272	0.8213	1.1238	1.2515	1.3408	1.4203	1.502	1.6182	1.6845	1.7371	1.7599	1.7782	1.7914	1.8006	1.8157	1.8243	1.8468	1.8635	1.8683
Odd_rep2_minC_p9	0.1099	0.0967	0.0944	0.0946	0.1018	0.1624	0.2737	0.4964	0.9277	1.1829	1.3288	1.4479	1.5545	1.6582	1.7183	1.7576	1.7921	1.8211	1.8516	1.8685	1.8907	1.9013	1.9066	1.9248	1.9374
Odd_rep2_gcvP_p9	0.1117	0.0985	0.0962	0.1001	0.1526	0.5046	0.9959	1.277	1.4557	1.5518	1.6408	1.7173	1.7832	1.8388	1.8647	1.8907	1.9073	1.9208	1.9341	1.9518	1.9579	1.9605	1.97	1.988	1.9939
Odd_rep2_treC_p9	0.1127	0.1018	0.0998	0.102	0.1647	0.4344	0.8444	1.1765	1.3771	1.5163	1.6415	1.7475	1.8219	1.8886	1.9137	1.9355	1.9509	1.9687	1.9832	2.0037	2.0183	2.0257	2.0468	2.0635	2.0763
Odd_rep2_galU_p9	0.1107	0.0978	0.0961	0.0994	0.1498	0.4311	0.9104	1.1668	1.3289	1.4443	1.5289	1.6046	1.6691	1.7333	1.7894	1.8361	1.8635	1.8824	1.902	1.9248	1.9359	1.9437	1.9573	1.9723	1.9815
Odd_rep2_carB_p9	0.1176	0.1052	0.1023	0.1033	0.1286	0.3239	0.7895	1.1055	1.2909	1.4269	1.5301	1.6277	1.7004	1.7737	1.8141	1.8613	1.8849	1.9092	1.9328	1.952	1.9643	1.9731	1.9848	1.9987	2.0033
Odd_rep2_purL_p9	0.1183	0.1076	0.105	0.1077	0.1477	0.5899	1.0521	1.3998	1.4844	1.5705	1.655	1.7336	1.7869	1.8189	1.8389	1.8656	1.8818	1.8977	1.9093	1.934	1.9489	1.9606	1.9727	1.9852	1.9971
Odd_rep2_creA_p9	0.1142	0.1033	0.1009	0.1039	0.1603	0.4822	1.0805	1.3888	1.5227	1.6222	1.6925	1.7538	1.8134	1.8781	1.9026	1.9299	1.9477	1.9661	1.9724	1.9885	1.9986	2.0008	2.0173	2.0251	2.0322
Odd_rep2_cyaA_p9	0.1159	0.1038	0.101	0.1032	0.1217	0.5517	1.1188	1.4123	1.5595	1.649	1.7152	1.7725	1.8296	1.8953	1.9112	1.9371	1.9588	1.97	1.9892	1.9968	2.003	2.0153	2.0253	2.0341	2.0364
Odd_rep2_sapD_p9	0.1166	0.1044	0.1019	0.1017	0.1097	0.1955	0.4677	0.9445	1.3315	1.454	1.5273	1.6022	1.6808	1.758	1.7762	1.7988	1.8094	1.8244	1.8479	1.8752	1.8937	1.9123	1.9288	1.9418	1.9516
Odd_rep2_psta_p9	0.1153	0.1027	0.0997	0.1008	0.1159	0.212	0.8926	1.1919	1.3414	1.4299	1.5143	1.5857	1.6489	1.7194	1.759	1.7933	1.8188	1.8381	1.873	1.9006	1.9214	1.932	1.9458	1.9654	1.9735
Odd_rep2_BW1_p9	0.1094	0.097	0.0949	0.097	0.1203	0.5318	0.987	1.234	1.398	1.5133	1.592	1.6473	1.7146	1.7896	1.837	1.867	1.8947	1.9058	1.9284	1.947	1.9629	1.9648	1.9717	1.9908	1.9922
Odd_rep2_BW2_p9	0.1086	0.0974	0.0953	0.0987	0.1468	0.4436	0.8484	1.0897	1.2698	1.4191	1.5228	1.5843	1.6499	1.7334	1.7994	1.8389	1.8701	1.8947	1.9143	1.9344	1.9465	1.9596	1.9763	1.9848	1.9948
Odd_rep2_Triclosan_resistant_BW_p9	0.1068	0.0968	0.0951	0.0959	0.1138	0.4654	1.1101	1.3361	1.4881	1.574	1.6456	1.6982	1.7487	1.8062	1.8614	1.8892	1.9172	1.934	1.954	1.974	1.9867	1.9982	2.0084	2.0227	2.0342
Odd_rep2_ptsN0.5_p10	0.1333	0.1246	0.1204	0.1194	0.1184	0.1183	0.1182	0.1176	0.1163	0.1166	0.1164	0.1165	0.1163	0.1158	0.1156	0.1142	0.1141	0.1139	0.1125	0.1115	0.1098	0.1096	0.1096	0.1116	0.1125
Odd_rep2_trkA0.5_p10	0.1335	0.1176	0.1138	0.1121	0.1114	0.114	0.1108	0.1096	0.1085	0.1085	0.1076	0.1082	0.108	0.1079	0.1075	0.1068	0.1059	0.1059	0.1053	0.1043	0.104	0.1036	0.1034	0.1036	0.1044
Odd_rep2_rsmB0.5_p10	0.1369	0.1167	0.1122	0.1107	0.1094	0.109	0.1081	0.1074	0.1065	0.1062	0.1053	0.1056	0.1059	0.1055	0.1043	0.1044	0.1042	0.1041	0.1039	0.1033	0.103	0.1032	0.1029	0.1027	0.1027
Odd_rep2_tatC0.5_p10	0.1274	0.109	0.1051	0.104	0.1028	0.1025	0.1018	0.1011	0.1004	0.1003	0.0998	0.0999	0.1002	0.0993	0.0997	0.0984	0.0984	0.0982	0.0978	0.0974	0.0973	0.0971	0.0968	0.0972	0.0974
Odd_rep2_NusBinsteadofA0.5_p10	0.1324	0.1137	0.109	0.1081	0.1067	0.1062	0.1051	0.1043	0.1033	0.1025	0.1023	0.1025	0.1026	0.1022	0.1013	0.1017	0.101	0.1011	0.1007	0.1001	0.0998	0.0998	0.0998	0.1001	0.1
Odd_rep2_greA0.5_p10	0.1191	0.104	0.1014	0.1005	0.0994	0.0991	0.0986	0.0982	0.0973	0.097	0.0967	0.0962	0.0967	0.097	0.096	0.0966	0.0968	0.1074	0.1068	0.1124	0.1038	0.1141	0.1052	0.1014	0.1111
Odd_rep2_metL0.5_p10	0.1319	0.1157	0.1128	0.1111	0.1099	0.109	0.1084	0.1076	0.1065	0.1058	0.1048	0.1055	0.1054	0.1048	0.1045	0.1041	0.1043	0.1037	0.1039	0.1028	0.1023	0.1028	0.1023	0.1027	0.1026
Odd_rep2_yhiL0.5_p10	0.1332	0.1155	0.1122	0.1113	0.1098	0.1085	0.1089	0.1081	0.1072	0.1075	0.1061	0.1067	0.1056	0.106	0.1056	0.1046	0.1054	0.1048	0.1032	0.104	0.1035	0.1039	0.1036	0.104	0.1037
Odd_rep2_wzzE0.5_p10	0.1262	0.1098	0.1066	0.1059	0.1039	0.1035	0.1029	0.1025	0.1017	0.1016	0.1007	0.101	0.101	0.1005	0.1002	0.1	0.1	0.0997	0.0989	0.0989	0.0983	0.0981	0.0982	0.0987	0.0984
Odd_rep2_fimI0.5_p10	0.1183	0.1046	0.1022	0.101	0.0994	0.0992	0.0988	0.0981	0.0971	0.0975	0.0969	0.0969	0.0966	0.0966	0.0967	0.0957	0.0957	0.0956	0.0951	0.0954	0.095	0.095	0.0947	0.0949	0.0943
Odd_rep2_trkH0.5_p10	0.1186	0.1039	0.1019	0.1009	0.0992	0.0987	0.0987	0.0976	0.0969	0.097	0.0964	0.0964	0.0959	0.0956	0.0958	0.0953	0.0952	0.0948	0.095	0.0949	0.094	0.0946	0.0943	0.0945	0.0941
Odd_rep2_dgoR0.5_p10	0.1128	0.0992	0.0967	0.0947	0.094	0.0935	0.0928	0.0922	0.0917	0.0913	0.0913	0.0907	0.0906	0.0906	0.0909	0.0904	0.0898	0.0898	0.0899	0.0893	0.0897	0.0889	0.0891	0.0891	0.0888
Odd_rep2_ybcV0.5_p10	0.1083	0.0957	0.0932	0.0926	0.0914	0.0912	0.0902	0.0904	0.0902	0.0903	0.0897	0.0895	0.0909	0.0894	0.0898	0.0895	0.088	0.0886	0.0879	0.0877	0.0873	0.0869	0.0873	0.0872	0.0869
Odd_rep2_marR0.5_p10	0.1306	0.1158	0.1108	0.1099	0.1095	0.1092	0.1078	0.1063	0.1069	0.1065	0.1072	0.106	0.1056	0.1055	0.1047	0.1044	0.1045	0.1048	0.104	0.104	0.1039	0.1029	0.1033	0.1026	0.102
Odd_rep2_ypjC0.5_p10	0.1092	0.0963	0.0945	0.0934	0.0925	0.0921	0.0921	0.0914	0.091	0.091	0.0911	0.0902	0.0906	0.0905	0.0903	0.0894	0.0891	0.0896	0.0895	0.0888	0.0883	0.088	0.0881	0.0884	0.0885
Odd_rep2_yabP0.5_p10	0.1112	0.0988	0.0971	0.0964	0.0947	0.0953	0.0945	0.0935	0.0933	0.0935	0.0931	0.0933	0.0931	0.0928	0.0927	0.0924	0.0922	0.0923	0.0921	0.091	0.0915	0.0911	0.0909	0.091	0.0907
Odd_rep2_ycjD0.5_p10	0.1223	0.1084	0.1056	0.1047	0.1039	0.1032	0.1023	0.1014	0.1014	0.1012	0.1019	0.1013	0.101	0.1	0.1004	0.1005	0.0993	0.1004	0.1002	0.0999	0.0992	0.0982	0.0996	0.0982	0.0978
Odd_rep2_ubiH0.5_p10	0.1189	0.1054	0.1035	0.1023	0.1013	0.1004	0.1003	0.0992	0.0984	0.0991	0.0984	0.0985	0.0982	0.0986	0.0986	0.0975	0.0976	0.0973	0.097	0.0957	0.0958	0.0954	0.0956	0.0958	0.0959
Odd_rep2_glpR0.5_p10	0.1192	0.1046	0.1024	0.1021	0.1002	0.0991	0.0995	0.0979	0.0973	0.0986	0.0972	0.0978	0.0967	0.0976	0.0973	0.0962	0.0963	0.0958	0.0954	0.0948	0.0943	0.0941	0.0945	0.0953	0.0958
Odd_rep2_ybbC0.5_p10	0.1224	0.1084	0.1072	0.1063	0.1048	0.1037	0.1033	0.1025	0.1027	0.1025	0.1015	0.1021	0.1015	0.101	0.1012	0.1002	0.1006	0.0994	0.0995	0.0993	0.0988	0.0985	0.0996	0.099	0.0989
Odd_rep2_gadE0.5_p10	0.1223	0.1081	0.1064	0.1048	0.1034	0.1025	0.1017	0.1003	0.1006	0.1004	0.1002	0.1002	0.0992	0.0998	0.0997	0.0989	0.0986	0.0986	0.0979	0.0978	0.0975	0.0976	0.0981	0.0974	0.0971
Odd_rep2_BW10.5_p10	0.1161	0.1031	0.1011	0.1003	0.0992	0.0975	0.0984	0.097	0.0958	0.0968	0.0967	0.0959	0.0957	0.0959	0.096	0.0953	0.0948	0.0951	0.0947	0.0943	0.0953	0.0933	0.0937	0.094	0.0937
Odd_rep2_BW20.5_p10	0.1126	0.0998	0.0973	0.096	0.0952	0.0946	0.0943	0.0934	0.0929	0.093	0.0926	0.0916	0.0922	0.0922	0.0915	0.0906	0.0911	0.0915	0.0909	0.0914	0.0907	0.0901	0.091	0.0902	0.0899
Odd_rep2_Triclosan_resistant_BW0.5_p10	0.1114	0.0991	0.0958	0.0948	0.0939	0.0954	0.0952	0.0975	0.1008	0.1076	0.1209	0.1386	0.1608	0.2097	0.3268	0.6006	0.7837	0.97	1.1946	1.3428	1.4332	1.4816	1.5533	1.6029	1.6525
Odd_rep2_ptsN0.125_p10	0.1268	0.1144	0.1125	0.1114	0.1108	0.1132	0.1232	0.2615	0.7221	0.7839	1.2241	1.3895	1.448	1.5206	1.6065	1.6877	1.7671	1.8409	1.9103	1.9457	1.974	1.9932	2.0119	2.0193	2.0357
Odd_rep2_trkA0.125_p10	0.1215	0.1086	0.1066	0.1053	0.1042	0.1044	0.1099	0.3517	0.6957	0.8996	1.1376	1.3952	1.5	1.5807	1.6299	1.6623	1.7061	1.7331	1.7735	1.8062	1.8291	1.8559	1.8795	1.9062	1.9259
Odd_rep2_rsmB0.125_p10	0.1221	0.1101	0.1079	0.1068	0.1091	0.1057	0.1113	0.2176	0.6181	1.0631	1.2248	1.4432	1.5281	1.5968	1.665	1.7355	1.8056	1.8645	1.9126	1.9418	1.9647	1.9828	1.9928	2.0107	2.0204
Odd_rep2_tatC0.125_p10	0.1199	0.107	0.1044	0.103	0.1021	0.1019	0.1012	0.1011	0.1003	0.1005	0.1002	0.1008	0.0999	0.1004	0.1008	0.1017	0.1046	0.1111	0.1219	0.1357	0.1628	0.1971	0.2483	0.3597	0.5336
Odd_rep2_NusBinsteadofA0.125_p10	0.1288	0.1148	0.1119	0.1104	0.1101	0.1096	0.1094	0.1079	0.1073	0.1076	0.1075	0.1119	0.1163	0.1233	0.1351	0.1439	0.1543	0.1658	0.1917	0.2536	0.3735	0.3918	0.3778	0.4432	0.5613
Odd_rep2_greA0.125_p10	0.1168	0.1044	0.102	0.1013	0.1012	0.1004	0.1012	0.1036	0.1992	0.6299	0.888	1.1552	1.4032	1.4801	1.5413	1.6032	1.6826	1.7504	1.8264	1.8628	1.8961	1.9294	1.9481	1.9724	1.9877
Odd_rep2_metL0.125_p10	0.1212	0.1086	0.1052	0.1041	0.1041	0.103	0.1033	0.1024	0.114	0.2243	0.4623	0.4811	0.5958	0.6948	1.2971	1.4562	1.4901	1.5373	1.611	1.6886	1.7354	1.8226	1.859	1.8907	1.9243
Odd_rep2_yhiL0.125_p10	0.1181	0.1062	0.1031	0.1023	0.1023	0.1023	0.1026	0.1032	0.1055	0.1162	0.1606	0.2944	0.5666	0.9256	1.3122	1.4895	1.5961	1.649	1.7028	1.7569	1.8181	1.883	1.9295	1.9829	2.0286
Odd_rep2_wzzE0.125_p10	0.1232	0.1096	0.1068	0.105	0.1049	0.1044	0.1036	0.103	0.102	0.1027	0.1222	0.2325	0.4357	0.5546	0.7124	0.7888	1.1284	1.3797	1.5541	1.6765	1.7675	1.8495	1.9065	1.9671	2.0033
Odd_rep2_fimI0.125_p10	0.1142	0.1022	0.0996	0.0979	0.0985	0.0971	0.0973	0.096	0.0951	0.0956	0.0941	0.096	0.0942	0.094	0.0951	0.0943	0.0939	0.0936	0.0935	0.0924	0.0916	0.0922	0.0929	0.0925	0.0923
Odd_rep2_trkH0.125_p10	0.1132	0.1003	0.0975	0.0962	0.0955	0.0947	0.0947	0.0936	0.0927	0.0932	0.0919	0.0932	0.092	0.0935	0.1591	0.4269	0.7138	0.9172	1.1424	1.3002	1.3704	1.4561	1.5203	1.5646	1.5946
Odd_rep2_dgoR0.125_p10	0.1064	0.0954	0.0931	0.0919	0.0907	0.0903	0.0897	0.0888	0.0889	0.0898	0.0929	0.0899	0.0925	0.0909	0.0902	0.0891	0.0895	0.0902	0.0896	0.0889	0.0884	0.0881	0.0883	0.0893	0.0869
Odd_rep2_ybcV0.125_p10	0.1143	0.1012	0.0992	0.098	0.0967	0.0972	0.1153	0.2052	0.4265	0.7602	1.041	1.1999	1.4049	1.5247	1.6131	1.6767	1.728	1.7639	1.8029	1.8407	1.8742	1.9177	1.9528	1.968	1.9928
Odd_rep2_marR0.125_p10	0.116	0.1038	0.1021	0.1006	0.0993	0.0992	0.0984	0.0983	0.0973	0.0977	0.0972	0.0973	0.0971	0.0968	0.0969	0.0959	0.0958	0.096	0.0953	0.095	0.0947	0.0948	0.0945	0.0946	0.0943
Odd_rep2_ypjC0.125_p10	0.1161	0.1049	0.103	0.1017	0.1006	0.1004	0.1003	0.1012	0.1351	0.3442	0.6669	0.8456	1.077	1.3238	1.4998	1.6198	1.6741	1.7094	1.7648	1.8233	1.8876	1.9413	1.9791	2.006	2.0181
Odd_rep2_yabP0.125_p10	0.115	0.104	0.1022	0.1011	0.1003	0.1	0.1001	0.1	0.1079	0.2316	0.4694	0.7508	0.942	1.1153	1.3325	1.5383	1.6517	1.7041	1.7543	1.8073	1.835	1.8788	1.9071	1.9481	1.9825
Odd_rep2_ycjD0.125_p10	0.1167	0.1073	0.1057	0.1055	0.106	0.1108	0.1505	0.4754	0.8306	1.1535	1.3717	1.5219	1.601	1.669	1.7314	1.7878	1.8579	1.9145	1.9667	2.014	2.0218	2.0512	2.0549	2.0759	2.0832
Odd_rep2_ubiH0.125_p10	0.1103	0.0999	0.0981	0.0973	0.0971	0.0996	0.1219	0.2815	0.5403	0.7715	1.0524	1.2698	1.3726	1.4512	1.5116	1.5562	1.5963	1.6121	1.6408	1.6718	1.6781	1.6927	1.6999	1.7226	1.7378
Odd_rep2_glpR0.125_p10	0.1163	0.1042	0.102	0.101	0.1001	0.1001	0.0996	0.0993	0.0987	0.0986	0.0987	0.1021	0.1437	0.2626	0.5687	0.7874	0.9055	1.0417	1.1164	1.3463	1.5351	1.6193	1.6959	1.7519	1.8136
Odd_rep2_ybbC0.125_p10	0.113	0.1032	0.1016	0.1011	0.1001	0.1011	0.1004	0.1047	0.2822	0.5819	0.8504	1.0888	1.2859	1.4828	1.5741	1.6347	1.6935	1.7386	1.7853	1.8332	1.8645	1.897	1.9292	1.9547	1.9894
Odd_rep2_gadE0.125_p10	0.1149	0.1037	0.1018	0.1009	0.1001	0.0997	0.0993	0.099	0.1013	0.1451	0.264	0.497	0.723	0.9779	1.2529	1.3155	1.4511	1.6044	1.7161	1.7821	1.8395	1.8952	1.9498	1.9995	2.0549
Odd_rep2_BW10.125_p10	0.1131	0.1007	0.0985	0.0976	0.0965	0.0964	0.0957	0.0955	0.095	0.1012	0.2408	0.4519	0.6157	0.8001	0.9907	1.1234	1.2058	1.2846	1.4237	1.5163	1.5947	1.6412	1.6823	1.7229	1.7659
Odd_rep2_BW20.125_p10	0.104	0.0929	0.0911	0.09	0.0895	0.0891	0.0884	0.088	0.0874	0.0874	0.0872	0.0874	0.0912	0.1459	0.3484	0.6142	0.844	1.0126	1.15	1.3549	1.4915	1.5864	1.6574	1.7055	1.7623
Odd_rep2_Triclosan_resistant_BW0.125_p10	0.107	0.0944	0.0917	0.0914	0.0901	0.0907	0.0948	0.151	0.5712	0.9778	1.2821	1.5024	1.5879	1.638	1.695	1.7331	1.7826	1.8088	1.8347	1.8652	1.9027	1.9236	1.9484	1.9668	1.9815
Odd_rep2_ptsN0.015_p10	0.1103	0.0986	0.0971	0.0992	0.1378	0.7155	1.016	1.344	1.4251	1.5262	1.6193	1.7008	1.7853	1.8504	1.876	1.8991	1.9391	1.9518	1.9675	1.9839	1.9941	2.0088	2.0217	2.028	2.0377
Odd_rep2_trkA0.015_p10	0.1241	0.1116	0.1095	0.1121	0.1526	0.3421	1.0453	1.3723	1.4517	1.5492	1.628	1.6884	1.7566	1.8048	1.8442	1.8725	1.8826	1.9042	1.9141	1.9428	1.9518	1.9616	1.9693	1.9759	1.9899
Odd_rep2_rsmB0.015_p10	0.1216	0.1102	0.1094	0.1134	0.168	0.8568	1.282	1.4781	1.5775	1.6476	1.7229	1.7859	1.8475	1.8995	1.9494	1.972	1.9964	2.0027	2.0179	2.0303	2.0366	2.0606	2.0641	2.069	2.0795
Odd_rep2_tatC0.015_p10	0.1099	0.0995	0.0982	0.0983	0.1039	0.1606	0.3199	0.4014	0.5774	0.5994	0.9647	1.2532	1.4228	1.5903	1.6198	1.6517	1.6846	1.7035	1.7251	1.7434	1.7572	1.7678	1.7808	1.7838	1.7938
Odd_rep2_NusBinsteadofA0.015_p10	0.1047	0.0946	0.0929	0.0928	0.0942	0.1068	0.3188	0.7204	0.9872	1.1925	1.3286	1.4214	1.5015	1.5644	1.6217	1.673	1.7225	1.768	1.81	1.8455	1.858	1.8874	1.8937	1.9001	1.9136
Odd_rep2_greA0.015_p10	0.1155	0.1047	0.1036	0.1084	0.1693	0.6648	1.0772	1.3901	1.4895	1.5831	1.6406	1.7022	1.7806	1.8661	1.881	1.9064	1.931	1.9513	1.9684	1.9878	2.0018	2.0164	2.026	2.0347	2.0541
Odd_rep2_metL0.015_p10	0.1068	0.0951	0.0942	0.0944	0.1031	0.1464	0.2192	0.7788	1.3799	1.4716	1.5277	1.5913	1.6615	1.7451	1.7654	1.7886	1.8138	1.8287	1.8516	1.8642	1.8819	1.8938	1.9007	1.911	1.9253
Odd_rep2_yhiL0.015_p10	0.106	0.0955	0.0948	0.0992	0.1569	0.646	1.2586	1.476	1.5959	1.6625	1.7197	1.7945	1.8587	1.9235	1.9609	1.9789	1.9953	2.0058	2.0222	2.0371	2.0398	2.0551	2.0623	2.0684	2.0773
Odd_rep2_wzzE0.015_p10	0.1181	0.1055	0.1034	0.1055	0.1423	0.749	1.1273	1.39	1.4809	1.5636	1.6353	1.7091	1.7695	1.8061	1.8438	1.8595	1.8946	1.912	1.9406	1.9605	1.9709	1.9857	2.0027	2.0189	2.0231
Odd_rep2_fimI0.015_p10	0.1065	0.0961	0.0949	0.0978	0.1354	0.3058	0.8811	1.2072	1.3441	1.4661	1.5454	1.6271	1.6959	1.7284	1.7623	1.7857	1.8009	1.8144	1.8327	1.8553	1.8772	1.8967	1.9095	1.9263	1.9407
Odd_rep2_trkH0.015_p10	0.1159	0.1039	0.1017	0.1038	0.1474	0.6985	1.0346	1.2203	1.2828	1.4597	1.6012	1.7098	1.7979	1.8557	1.8955	1.9368	1.9629	1.9771	2.0054	2.0255	2.0376	2.0498	2.0591	2.0686	2.0776
Odd_rep2_dgoR0.015_p10	0.1043	0.0927	0.0911	0.093	0.129	0.5019	0.9726	1.2706	1.2598	1.4099	1.5369	1.6549	1.7329	1.7884	1.8232	1.8552	1.8847	1.9031	1.9271	1.9513	1.964	1.9786	1.9858	1.9951	2.0119
Odd_rep2_ybcV0.015_p10	0.1126	0.1013	0.0995	0.1023	0.143	0.6351	0.9851	1.3935	1.4831	1.565	1.6413	1.7142	1.7836	1.8424	1.8739	1.8978	1.918	1.9337	1.9502	1.9732	1.9829	1.9905	1.9986	2.0091	2.024
Odd_rep2_marR0.015_p10	0.1148	0.1043	0.1042	0.1124	0.208	0.7795	1.1677	1.4677	1.5677	1.6277	1.6914	1.7635	1.8205	1.8808	1.928	1.9536	1.9718	1.987	1.9993	2.0165	2.0236	2.0324	2.0303	2.04	2.0526
Odd_rep2_ypjC0.015_p10	0.1102	0.1001	0.0991	0.1039	0.1679	0.6767	1.2675	1.4816	1.5761	1.6489	1.7204	1.7941	1.8542	1.926	1.9542	1.9706	1.9846	2.0029	2.0156	2.031	2.0324	2.0534	2.0505	2.0628	2.0698
Odd_rep2_yabP0.015_p10	0.1057	0.0989	0.0989	0.1019	0.1548	0.7383	1.1539	1.3801	1.5116	1.5976	1.6621	1.7242	1.7847	1.832	1.8811	1.9276	1.9645	1.9863	2.0089	2.0269	2.0321	2.0409	2.053	2.0565	2.0714
Odd_rep2_ycjD0.015_p10	0.106	0.0959	0.0957	0.0991	0.1474	0.4817	1.1018	1.3954	1.5568	1.6359	1.7066	1.7813	1.8389	1.9024	1.9651	1.9875	2.0158	2.0286	2.0419	2.0587	2.0734	2.0831	2.0905	2.0909	2.1019
Odd_rep2_ubiH0.015_p10	0.1128	0.103	0.102	0.1022	0.1067	0.1295	0.247	0.5266	0.9724	1.373	1.5112	1.6014	1.652	1.6699	1.6573	1.6347	1.6302	1.6687	1.6908	1.7194	1.7474	1.7722	1.8063	1.8102	1.8375
Odd_rep2_glpR0.015_p10	0.1058	0.0965	0.0972	0.1011	0.1808	0.9054	1.2922	1.5069	1.5957	1.672	1.7391	1.8132	1.875	1.934	1.9717	1.9924	2.0068	2.0193	2.0302	2.0467	2.0495	2.057	2.0587	2.0611	2.0622
Odd_rep2_ybbC0.015_p10	0.1055	0.0959	0.0954	0.1	0.1525	0.6339	1.2128	1.4644	1.5551	1.6209	1.6759	1.7467	1.8018	1.869	1.9125	1.9392	1.958	1.9792	1.9924	1.9974	2.0128	2.0225	2.0297	2.0321	2.0438
Odd_rep2_gadE0.015_p10	0.112	0.1011	0.0999	0.1033	0.1783	0.8986	1.309	1.533	1.631	1.704	1.7769	1.8335	1.899	1.9532	1.9791	1.9985	2.0189	2.0298	2.0454	2.0539	2.0568	2.0666	2.0746	2.0801	2.0909
Odd_rep2_BW10.015_p10	0.1071	0.0961	0.0948	0.1002	0.162	0.6971	1.0369	1.2814	1.415	1.5045	1.5787	1.6459	1.7072	1.7536	1.791	1.8302	1.8681	1.9082	1.9358	1.9567	1.9681	1.9788	1.9825	1.9869	1.994
Odd_rep2_BW20.015_p10	0.1191	0.1066	0.1044	0.1089	0.1852	0.7646	1.1118	1.3631	1.4715	1.5674	1.6297	1.6841	1.7362	1.7835	1.8228	1.8536	1.8995	1.9462	1.9506	1.9765	1.9853	1.9911	1.9984	2.0056	2.0119
Odd_rep2_Triclosan_resistant_BW0.015_p10	0.1055	0.0941	0.092	0.0925	0.1182	0.3997	0.8902	1.2278	1.3872	1.4952	1.5669	1.6324	1.684	1.728	1.7657	1.8024	1.8362	1.8628	1.8988	1.9335	1.9569	1.9634	1.9768	1.9832	1.9907
Odd_rep2_ptsN_p10	0.1158	0.1055	0.1034	0.1066	0.1516	0.5273	1.0437	1.3118	1.4396	1.5418	1.6408	1.7369	1.8087	1.8667	1.9023	1.9209	1.9507	1.9732	1.9869	2.0104	2.0201	2.0346	2.0436	2.0433	2.068
Odd_rep2_trkA_p10	0.1141	0.1036	0.1021	0.1027	0.1315	0.2632	1.0102	1.3378	1.4353	1.5119	1.5853	1.6603	1.7194	1.7815	1.8226	1.8395	1.8672	1.8799	1.8983	1.9163	1.9289	1.9362	1.9492	1.9583	1.9746
Odd_rep2_rsmB_p10	0.1117	0.1015	0.1005	0.1049	0.1522	0.7619	1.2516	1.4487	1.5572	1.6289	1.7016	1.7733	1.8341	1.8947	1.9346	1.9593	1.9782	1.996	2.0132	2.0191	2.035	2.0454	2.0509	2.0589	2.07
Odd_rep2_tatC_p10	0.1139	0.1034	0.1024	0.1025	0.1142	0.201	0.3793	0.5053	0.5966	0.7378	1.0693	1.2962	1.4371	1.5749	1.6117	1.651	1.6954	1.7161	1.7353	1.7464	1.7571	1.7654	1.7673	1.7743	1.7806
Odd_rep2_NusBinsteadofA_p10	0.112	0.102	0.1002	0.1001	0.1003	0.1079	0.1609	0.6437	0.9125	1.1702	1.3353	1.413	1.468	1.5155	1.5631	1.6102	1.6604	1.7124	1.7516	1.7872	1.8118	1.8287	1.8395	1.8564	1.8709
Odd_rep2_greA_p10	0.1119	0.102	0.1011	0.1051	0.1474	0.5278	1.0259	1.3196	1.4159	1.491	1.5448	1.6059	1.6803	1.7618	1.8025	1.8365	1.868	1.8873	1.9054	1.9235	1.9401	1.9493	1.9642	1.9755	1.9871
Odd_rep2_metL_p10	0.1095	0.0988	0.0977	0.0981	0.1081	0.1623	0.2392	0.5551	1.2569	1.4104	1.4786	1.567	1.6423	1.7	1.7253	1.7482	1.7716	1.7897	1.8043	1.8218	1.8372	1.8537	1.8627	1.867	1.8768
Odd_rep2_yhiL_p10	0.1122	0.1025	0.101	0.1026	0.13	0.7791	1.2454	1.465	1.5666	1.6292	1.6897	1.76	1.8203	1.8907	1.9304	1.9504	1.9741	1.9874	2.0017	2.016	2.031	2.042	2.0465	2.0578	2.0632
Odd_rep2_wzzE_p10	0.1131	0.1028	0.101	0.1037	0.1235	0.682	1.0896	1.419	1.4078	1.523	1.6067	1.6919	1.7333	1.8001	1.8342	1.8531	1.8682	1.8897	1.9027	1.9234	1.9364	1.9505	1.968	1.9801	1.9901
Odd_rep2_fimI_p10	0.1461	0.1013	0.0993	0.1025	0.137	0.266	0.8432	1.1481	1.3018	1.4089	1.4958	1.5766	1.6333	1.7018	1.7579	1.7716	1.8047	1.8161	1.8262	1.8384	1.8474	1.865	1.8803	1.8947	1.9024
Odd_rep2_trkH_p10	0.1107	0.0992	0.0971	0.0978	0.1244	0.5734	0.9478	1.069	1.2083	1.3742	1.5118	1.644	1.7261	1.7989	1.8438	1.8853	1.9142	1.9399	1.9648	1.9904	2.0024	2.0165	2.026	2.0269	2.0361
Odd_rep2_dgoR_p10	0.1081	0.0974	0.095	0.0966	0.1198	0.4449	0.9318	1.1414	1.1521	1.3164	1.4721	1.6053	1.6843	1.7395	1.7952	1.8326	1.8612	1.8876	1.9067	1.9308	1.9386	1.9609	1.9701	1.9777	1.9837
Odd_rep2_ybcV_p10	0.1132	0.1027	0.1005	0.1026	0.137	0.3547	0.7581	1.4196	1.4879	1.5584	1.6175	1.6839	1.7559	1.8088	1.8354	1.8614	1.8848	1.8952	1.9202	1.936	1.9444	1.9625	1.977	1.9848	2.0004
Odd_rep2_marR_p10	0.1146	0.1035	0.1016	0.1048	0.1802	0.6198	1.1834	1.4218	1.5445	1.6104	1.6608	1.7235	1.7869	1.8548	1.8835	1.9142	1.9409	1.9567	1.9747	1.9869	1.9966	2.0105	2.0205	2.0255	2.0367
Odd_rep2_ypjC_p10	0.1217	0.1107	0.1086	0.1103	0.1627	0.7656	1.2535	1.4821	1.5716	1.6352	1.7062	1.7764	1.8366	1.9044	1.9282	1.9555	1.9831	1.9958	2.0144	2.0292	2.0369	2.0473	2.0547	2.0659	2.077
Odd_rep2_yabP_p10	0.1188	0.1077	0.1055	0.1067	0.1354	0.5154	1.1264	1.3601	1.5038	1.5941	1.6577	1.7156	1.7623	1.8122	1.8618	1.9197	1.9483	1.9681	1.9888	2.0144	2.0164	2.0339	2.0437	2.052	2.0691
Odd_rep2_ycjD_p10	0.1216	0.1109	0.1088	0.11	0.1375	0.337	1.05	1.3329	1.4751	1.5643	1.6352	1.6958	1.756	1.8248	1.8796	1.9209	1.9483	1.9719	2.0017	2.0169	2.0284	2.0395	2.0565	2.0576	2.0748
Odd_rep2_ubiH_p10	0.1225	0.112	0.109	0.1084	0.1112	0.1211	0.1445	0.2866	0.8329	1.3016	1.5042	1.5965	1.6552	1.7072	1.7518	1.7891	1.8235	1.8399	1.8641	1.8804	1.8842	1.8968	1.9003	1.9128	1.9251
Odd_rep2_glpR_p10	0.1151	0.1036	0.1011	0.1052	0.1439	0.8065	1.2377	1.4483	1.5399	1.6158	1.6909	1.7608	1.8234	1.9043	1.9335	1.9615	1.9795	1.9859	2.0054	2.0197	2.0213	2.0311	2.0345	2.0377	2.0486
Odd_rep2_ybbC_p10	0.1162	0.1058	0.1036	0.1045	0.1248	0.4255	1.1535	1.3746	1.489	1.5538	1.6151	1.6817	1.7456	1.8081	1.8438	1.8704	1.8981	1.9073	1.9309	1.9513	1.962	1.9715	1.9784	1.9846	2.0013
Odd_rep2_gadE_p10	0.1184	0.1078	0.1057	0.1087	0.1454	0.8826	1.3018	1.5235	1.6093	1.6725	1.7386	1.8084	1.8684	1.9337	1.9645	1.9807	2.0144	2.0172	2.0343	2.0523	2.064	2.065	2.085	2.0771	2.0953
Odd_rep2_BW1_p10	0.11	0.098	0.0964	0.0991	0.1492	0.6734	1.0981	1.3014	1.4242	1.5093	1.5787	1.6327	1.6831	1.7297	1.7608	1.8102	1.8614	1.8918	1.9325	1.9564	1.9624	1.9759	1.9885	1.9853	1.9917
Odd_rep2_BW2_p10	0.1142	0.1025	0.1009	0.1043	0.1447	0.756	1.1522	1.3379	1.4466	1.5262	1.5932	1.6524	1.6943	1.7306	1.7732	1.8082	1.8559	1.8855	1.9265	1.9422	1.9603	1.9757	1.9832	1.9867	1.9938
Odd_rep2_Triclosan_resistant_BW_p10	0.1109	0.0996	0.0979	0.0991	0.1144	0.4102	0.9313	1.2869	1.4142	1.516	1.5788	1.64	1.6843	1.7235	1.7617	1.7952	1.8319	1.8441	1.8872	1.9236	1.9428	1.968	1.9899	2.0047	2.0175
Odd_rep2_ompX0.5_p14	0.1082	0.1038	0.1007	0.0993	0.0985	0.0977	0.0974	0.0968	0.0965	0.0997	0.1091	0.0988	0.0964	0.0995	0.1069	0.1046	0.0958	0.0954	0.0955	0.0952	0.1011	0.1096	0.1034	0.0966	0.1102
Odd_rep2_purH0.5_p14	0.1074	0.1005	0.0962	0.0942	0.0932	0.0922	0.091	0.0911	0.0909	0.0902	0.0892	0.0899	0.0902	0.0897	0.0892	0.0893	0.0898	0.0892	0.0894	0.0895	0.0888	0.089	0.0883	0.0892	0.0886
Odd_rep2_acrR0.5_p14	0.1124	0.0982	0.0946	0.093	0.092	0.0914	0.0902	0.0897	0.0899	0.0891	0.0889	0.0887	0.0879	0.0878	0.0876	0.0875	0.0871	0.0872	0.0871	0.0877	0.0864	0.0865	0.0864	0.0859	0.0858
Odd_rep2_kgtP0.5_p14	0.1123	0.0973	0.0939	0.0921	0.1017	0.1182	0.1011	0.1001	0.0996	0.1112	0.115	0.1205	0.115	0.111	0.0974	0.0995	0.1063	0.109	0.1063	0.0952	0.1183	0.1187	0.1153	0.1129	0.1166
Odd_rep2_napD0.5_p14	0.1153	0.0988	0.0955	0.093	0.092	0.0916	0.0903	0.09	0.0898	0.0894	0.0888	0.0887	0.0879	0.0878	0.0879	0.0873	0.0869	0.0873	0.087	0.0879	0.0865	0.0871	0.0866	0.0862	0.086
Odd_rep2_pcnB0.5_p14	0.1137	0.0995	0.0963	0.0951	0.0944	0.0935	0.0922	0.092	0.0914	0.091	0.0911	0.0904	0.0902	0.0899	0.0898	0.0894	0.0891	0.0895	0.0891	0.0897	0.0887	0.0887	0.0886	0.0884	0.088
Odd_rep2_aroK0.5_p14	0.1167	0.0992	0.0953	0.0933	0.0923	0.0912	0.0903	0.0903	0.0901	0.0895	0.0892	0.0893	0.0888	0.0881	0.0879	0.0881	0.088	0.0874	0.0869	0.0884	0.0872	0.0872	0.0871	0.0862	0.0862
Odd_rep2_ynfD0.5_p14	0.1167	0.0993	0.096	0.094	0.0934	0.093	0.0917	0.0915	0.0916	0.0905	0.0908	0.0895	0.0893	0.0891	0.0896	0.089	0.0893	0.0888	0.0882	0.089	0.0881	0.0884	0.088	0.0878	0.0876
OddandEven_rep2_SL13540.5_p14	0.1365	0.1277	0.1262	0.1215	0.1214	0.1217	0.1203	0.1196	0.1206	0.1197	0.1199	0.1195	0.1186	0.1178	0.116	0.1187	0.1169	0.1175	0.1194	0.1185	0.1168	0.1163	0.1172	0.1174	0.1183
OddandEven_rep2_SL7020.5_p14	0.1216	0.1077	0.1058	0.1041	0.1097	0.1742	0.8118	1.0061	1.2005	1.3144	1.3762	1.4614	1.5891	1.7234	1.8384	1.8831	1.9048	1.9379	1.9508	1.9767	1.9833	1.9902	1.9944	1.9952	2.0057
OddandEven_rep2_BW10.5_p14	0.1204	0.1071	0.106	0.1026	0.1018	0.1012	0.1005	0.0997	0.1008	0.0996	0.0998	0.0996	0.0998	0.0995	0.0993	0.1005	0.0996	0.1009	0.1004	0.1006	0.0999	0.1	0.0998	0.0998	0.1001
OddandEven_rep2_BW20.5_p14	0.1086	0.097	0.0966	0.0918	0.0911	0.0915	0.0902	0.0892	0.0901	0.0891	0.0898	0.0901	0.0886	0.0883	0.0869	0.0879	0.0872	0.0876	0.0888	0.0887	0.0866	0.0867	0.0876	0.0859	0.0876
OddandEven_rep2_Triclosan_resistant_BW0.5_p14	0.1112	0.0982	0.0969	0.0934	0.0948	0.0946	0.0966	0.1038	0.1161	0.1426	0.1869	0.2724	0.5817	0.7843	0.9413	1.0131	1.0996	1.2803	1.4165	1.504	1.5652	1.62	1.673	1.7166	1.766
OddandEven_rep2_BW10.5_p14	0.1154	0.1044	0.1006	0.0987	0.0979	0.0967	0.0962	0.0958	0.0962	0.0953	0.0952	0.096	0.0954	0.096	0.0942	0.0946	0.0942	0.0952	0.0943	0.0935	0.0937	0.0929	0.0948	0.0933	0.0931
OddandEven_rep2_BW20.5_p14	0.1065	0.0944	0.0921	0.0914	0.0898	0.0894	0.0891	0.0887	0.0875	0.0876	0.0869	0.0874	0.0868	0.0865	0.0865	0.0868	0.0859	0.086	0.0855	0.085	0.0853	0.0852	0.0852	0.0849	0.0851
OddandEven_rep2_Triclosan_resistant_BW0.5_p14	0.1054	0.0928	0.0912	0.0893	0.0895	0.0907	0.0907	0.0936	0.1029	0.1144	0.1305	0.1666	0.2087	0.3076	0.5838	0.8161	0.9737	1.2388	1.356	1.4295	1.4975	1.5473	1.5973	1.6622	1.6987
Odd_rep2_ompX0.125_p14	0.1217	0.1099	0.1067	0.1052	0.1041	0.1035	0.1024	0.1021	0.1018	0.1013	0.1007	0.1003	0.1001	0.0994	0.0991	0.0992	0.1065	0.2598	0.4479	0.6607	0.8501	1.0947	1.2841	1.3712	1.4112
Odd_rep2_purH0.125_p14	0.1253	0.1102	0.1066	0.1043	0.1035	0.1025	0.1014	0.1016	0.1011	0.1002	0.1004	0.0995	0.1	0.099	0.0989	0.0988	0.0989	0.0994	0.0992	0.0985	0.0984	0.0991	0.0988	0.0975	0.0978
Odd_rep2_acrR0.125_p14	0.1257	0.1125	0.1104	0.1089	0.1084	0.1063	0.1065	0.1061	0.1063	0.1061	0.1052	0.1056	0.1057	0.1047	0.1053	0.1056	0.1039	0.1053	0.1047	0.1042	0.1057	0.1053	0.1053	0.1047	0.1039
Odd_rep2_kgtP0.125_p14	0.1331	0.1185	0.1165	0.1156	0.1119	0.1115	0.1108	0.1112	0.1102	0.11	0.1094	0.1097	0.11	0.1096	0.11	0.1111	0.1109	0.1188	0.1418	0.2008	0.3328	0.5738	0.7871	0.9541	1.1804
Odd_rep2_napD0.125_p14	0.1349	0.1199	0.1198	0.1174	0.1148	0.1136	0.1141	0.1151	0.1196	0.1307	0.1712	0.2528	0.4169	0.6853	0.9486	1.0247	1.2132	1.4133	1.5253	1.6225	1.6791	1.7396	1.7971	1.8747	1.9458
Odd_rep2_pcnB0.125_p14	0.1373	0.1213	0.1186	0.1156	0.1156	0.1142	0.1148	0.1134	0.1141	0.1129	0.1125	0.1126	0.1133	0.1143	0.1172	0.1434	0.2233	0.3532	0.5263	0.7694	1.0612	1.1393	1.2778	1.4137	1.5429
Odd_rep2_aroK0.125_p14	0.1273	0.1125	0.1112	0.1084	0.1073	0.1087	0.1153	0.1453	0.2367	0.4494	0.6957	0.9967	1.3256	1.4597	1.5439	1.5952	1.6222	1.6559	1.69	1.7398	1.7811	1.8281	1.8638	1.9094	1.9453
Odd_rep2_ynfD0.125_p14	0.1172	0.1017	0.1038	0.1131	0.1019	0.098	0.0966	0.0957	0.0966	0.0956	0.0952	0.1033	0.261	0.4828	0.7019	1.0148	1.321	1.4773	1.5868	1.6842	1.7408	1.7804	1.8316	1.9137	1.9758
OddandEven_rep2_SL13540.125_p14	0.1131	0.1039	0.102	0.101	0.1003	0.1005	0.1015	0.1059	0.1304	0.2903	0.5084	0.754	0.9582	1.0155	1.0594	1.1316	1.2038	1.2671	1.3093	1.3581	1.4066	1.4624	1.5123	1.5708	1.6246
OddandEven_rep2_SL7020.125_p14	0.1179	0.1068	0.1049	0.1045	0.1076	0.1602	0.8251	0.9546	1.2031	1.298	1.3777	1.5005	1.6187	1.7399	1.8785	1.9013	1.9239	1.9449	1.9705	1.9943	2.023	2.0174	2.0301	2.0427	2.0354
OddandEven_rep2_BW10.125_p14	0.1106	0.1009	0.0981	0.0968	0.0956	0.0954	0.0953	0.0947	0.0944	0.0944	0.0946	0.0939	0.0953	0.0953	0.0955	0.0953	0.0956	0.0951	0.0957	0.095	0.0944	0.0955	0.0948	0.0949	0.0948
OddandEven_rep2_BW20.125_p14	0.1509	0.1278	0.1051	0.1042	0.1126	0.1017	0.101	0.0998	0.1066	0.1096	0.1146	0.1105	0.1037	0.1034	0.1027	0.104	0.1025	0.1045	0.1051	0.1025	0.0999	0.1009	0.1011	0.1006	0.0994
OddandEven_rep2_Triclosan_resistant_BW0.125_p14	0.1206	0.1092	0.1068	0.1049	0.1058	0.1115	0.3401	0.7273	1.0077	1.2811	1.4953	1.6021	1.6766	1.7287	1.7673	1.8055	1.8621	1.8948	1.942	1.9854	1.9848	2.0123	2.0096	2.0181	2.034
OddandEven_rep2_BW10.125_p14	0.1101	0.0985	0.0972	0.0959	0.0945	0.0941	0.0935	0.0937	0.0929	0.0929	0.0927	0.0931	0.0934	0.0923	0.0927	0.0924	0.0916	0.0913	0.0912	0.0915	0.0912	0.0913	0.0909	0.0911	0.0904
OddandEven_rep2_BW20.125_p14	0.1136	0.1014	0.0996	0.0985	0.0972	0.0964	0.0958	0.0948	0.0948	0.0947	0.0942	0.0939	0.0935	0.093	0.0929	0.0929	0.0921	0.0923	0.0928	0.0921	0.092	0.0919	0.0916	0.0911	0.0918
OddandEven_rep2_Triclosan_resistant_BW0.125_p14	0.1051	0.0929	0.091	0.0901	0.0892	0.0958	0.1008	0.6845	1.133	1.3346	1.4756	1.6055	1.6592	1.6889	1.7148	1.7617	1.7988	1.8316	1.8536	1.8786	1.8951	1.9169	1.93	1.9428	1.9608
Odd_rep2_ompX0.015_p14	0.1308	0.117	0.1149	0.1191	0.2003	0.9471	1.3141	1.5352	1.6102	1.6748	1.7382	1.8101	1.8689	1.923	1.9459	1.9745	1.985	1.9955	2.0174	2.0294	2.0546	2.046	2.0574	2.0688	2.0743
Odd_rep2_purH0.015_p14	0.1282	0.1144	0.1121	0.1162	0.1933	0.9089	1.2983	1.5298	1.6153	1.6647	1.7124	1.7637	1.8095	1.8642	1.8997	1.9416	1.9697	1.9937	2.0143	2.0284	2.0437	2.0441	2.0596	2.0644	2.0855
Odd_rep2_acrR0.015_p14	0.129	0.1172	0.1158	0.1184	0.1691	0.8631	1.1763	1.4958	1.4663	1.552	1.638	1.7069	1.7753	1.8502	1.8727	1.9058	1.9124	1.9303	1.9558	1.977	2.0074	2.0089	2.0208	2.0425	2.0373
Odd_rep2_kgtP0.015_p14	0.1396	0.1273	0.1247	0.1308	0.2268	0.8012	1.1571	1.5193	1.5274	1.5697	1.6554	1.7675	1.8441	1.9048	1.9322	1.9667	1.9964	2.0116	2.0433	2.0606	2.0727	2.087	2.0938	2.1	2.1152
Odd_rep2_napD0.015_p14	0.1286	0.1177	0.1168	0.1206	0.2078	0.9172	1.2533	1.4531	1.4835	1.5841	1.6804	1.7745	1.8443	1.9217	1.9595	2.0038	2.0343	2.0579	2.086	2.0937	2.1127	2.1296	2.1372	2.1376	2.1481
Odd_rep2_pcnB0.015_p14	0.1244	0.1131	0.112	0.1148	0.1687	0.7012	1.1686	1.4579	1.5846	1.6744	1.7446	1.825	1.875	1.9345	1.9764	2.0114	2.0326	2.047	2.0596	2.0852	2.1023	2.1124	2.1194	2.1349	2.1449
Odd_rep2_aroK0.015_p14	0.1361	0.125	0.1233	0.1243	0.1655	0.5415	0.9729	1.2069	1.3297	1.438	1.529	1.6402	1.7289	1.804	1.847	1.8867	1.9168	1.9526	1.9742	2.0003	2.0197	2.0317	2.0382	2.0524	2.0667
Odd_rep2_ynfD0.015_p14	0.1206	0.1088	0.1076	0.1105	0.1683	0.7933	1.1302	1.4354	1.47	1.5433	1.6336	1.7146	1.7896	1.8498	1.9062	1.9485	1.9745	1.9974	2.0146	2.0383	2.0532	2.0587	2.0719	2.0907	2.0957
OddandEven_rep2_SL13540.015_p14	0.1251	0.1135	0.1126	0.1107	0.1135	0.2064	0.5721	0.8097	0.9803	1.1698	1.2393	1.2349	1.2806	1.3471	1.4211	1.5003	1.5901	1.6874	1.6891	1.7048	1.729	1.7538	1.7585	1.7796	1.7842
OddandEven_rep2_SL7020.015_p14	0.1208	0.1092	0.1075	0.1078	0.1081	0.1362	0.8228	1.1033	1.2663	1.354	1.4259	1.5573	1.6933	1.8155	1.8898	1.9416	1.9686	1.9876	2.0047	2.0165	2.0258	2.036	2.0409	2.0599	2.0485
OddandEven_rep2_BW10.015_p14	0.1262	0.1154	0.1157	0.1215	0.2077	0.4468	0.7997	1.0602	1.204	1.2946	1.3686	1.4467	1.5084	1.5699	1.6323	1.6943	1.752	1.8041	1.8399	1.8754	1.8942	1.9117	1.9209	1.9309	1.9439
OddandEven_rep2_BW20.015_p14	0.1325	0.1208	0.1207	0.1298	0.2522	0.5157	0.8685	1.0696	1.2384	1.348	1.4387	1.5277	1.5963	1.6635	1.7225	1.7829	1.8439	1.8884	1.919	1.9443	1.9525	1.9712	1.9703	1.9898	2.0003
OddandEven_rep2_Triclosan_resistant_BW0.015_p14	0.1105	0.0995	0.0992	0.1086	0.2261	0.837	1.2041	1.3837	1.4894	1.5704	1.6414	1.703	1.7491	1.8032	1.8431	1.8859	1.9257	1.9614	1.9843	2.0061	2.0059	2.019	2.0206	2.0257	2.034
OddandEven_rep2_BW10.015_p14	0.1159	0.104	0.103	0.113	0.2515	0.6387	0.9454	1.1017	1.2422	1.3519	1.4443	1.5404	1.6114	1.6668	1.7192	1.7835	1.8474	1.8685	1.9013	1.929	1.9439	1.9572	1.9667	1.9747	1.9835
OddandEven_rep2_BW20.015_p14	0.1099	0.0978	0.0967	0.1039	0.1916	0.667	0.9763	1.181	1.323	1.4117	1.5153	1.5971	1.6635	1.7179	1.7666	1.8211	1.8668	1.8985	1.9236	1.9507	1.9631	1.9708	1.9822	1.9822	1.9993
OddandEven_rep2_Triclosan_resistant_BW0.015_p14	0.1097	0.0968	0.0957	0.101	0.1588	0.8551	1.2419	1.4073	1.4948	1.5689	1.6355	1.6861	1.725	1.7614	1.7937	1.8316	1.8557	1.8991	1.9142	1.9279	1.9355	1.9477	1.9564	1.9657	1.9767
Odd_rep2_ompX_p14	0.1111	0.0978	0.0957	0.0998	0.1311	0.2465	0.4005	0.7527	1.0311	1.2244	1.3851	1.518	1.6546	1.746	1.8099	1.8695	1.9088	1.9413	1.9681	2.0024	2.0188	2.0321	2.0474	2.0617	2.0676
Odd_rep2_purH_p14	0.117	0.1047	0.1028	0.1066	0.1566	0.4206	1.0226	1.3081	1.3999	1.5453	1.6547	1.7489	1.8297	1.8906	1.9298	1.9622	1.9852	2.0074	2.0406	2.0567	2.0629	2.0809	2.0867	2.1063	2.1049
Odd_rep2_acrR_p14	0.1073	0.0954	0.093	0.0951	0.1181	0.6073	0.9547	1.1954	1.397	1.4685	1.5658	1.6597	1.7451	1.8146	1.8458	1.8896	1.9135	1.9384	1.9654	1.9842	2.0009	2.0138	2.0172	2.0337	2.0406
Odd_rep2_kgtP_p14	0.1078	0.1189	0.0949	0.1011	0.1697	0.7758	1.2278	1.4434	1.5326	1.6067	1.6811	1.7554	1.8196	1.8836	1.9114	1.941	1.9586	1.9811	1.9986	2.0193	2.0312	2.039	2.0479	2.0653	2.0698
Odd_rep2_napD_p14	0.1102	0.0992	0.097	0.0952	0.1016	0.1562	0.4999	0.7926	1.1299	1.2426	1.3194	1.3491	1.4064	1.4566	1.5108	1.5849	1.6483	1.6729	1.7015	1.7257	1.7541	1.771	1.7833	1.8	1.8088
Odd_rep2_pcnB_p14	0.114	0.1022	0.1	0.0988	0.1008	0.1275	0.7336	1.0592	1.2742	1.3698	1.4305	1.5519	1.6897	1.7945	1.8939	1.936	1.9507	1.9747	1.9907	2.0012	2.0104	2.0062	2.005	2.0044	1.9964
Odd_rep2_aroK_p14	0.1254	0.115	0.1129	0.1197	0.2222	0.4607	0.6832	1.0639	1.2263	1.3417	1.4292	1.5197	1.5745	1.6131	1.6489	1.699	1.741	1.7677	1.7932	1.8068	1.8136	1.8358	1.84	1.852	1.8603
Odd_rep2_ynfD_p14	0.1104	0.0984	0.0968	0.1022	0.1982	0.4958	0.7793	1.0626	1.2443	1.3591	1.4509	1.5419	1.6051	1.66	1.7164	1.7798	1.8205	1.8458	1.8797	1.9075	1.9283	1.9379	1.9481	1.9588	1.974
OddandEven_rep2_SL1354_p14	0.1147	0.1036	0.1012	0.103	0.126	0.6624	1.0601	1.375	1.442	1.5457	1.6321	1.7109	1.7974	1.8597	1.904	1.9405	1.9705	1.9891	2.0191	2.0401	2.0666	2.0681	2.0733	2.0927	2.101
OddandEven_rep2_SL702_p14	0.1102	0.0996	0.0974	0.0992	0.12	0.2781	1.0876	1.4139	1.5374	1.6236	1.712	1.7756	1.8321	1.8836	1.9222	1.9525	1.9731	1.997	2.0177	2.0354	2.0562	2.0609	2.075	2.0893	2.1025
OddandEven_rep2_BW1_p14	0.1106	0.0996	0.098	0.0988	0.1186	0.2859	0.8884	1.2089	1.3225	1.4292	1.544	1.624	1.706	1.7736	1.8214	1.8583	1.8872	1.9146	1.9563	1.9776	1.9977	2.0109	2.026	2.0386	2.056
OddandEven_rep2_BW2_p14	0.1125	0.1014	0.0989	0.0992	0.1229	0.4044	0.9744	1.3387	1.3657	1.451	1.5452	1.6026	1.6621	1.7198	1.7623	1.7928	1.8228	1.8454	1.8743	1.8923	1.9118	1.9183	1.9414	1.9523	1.9626
OddandEven_rep2_Triclosan_resistant_BW_p14	0.1061	0.0957	0.0935	0.0972	0.1445	0.7354	1.175	1.4059	1.5005	1.5646	1.635	1.6933	1.7624	1.8248	1.8608	1.8968	1.9155	1.9352	1.9487	1.9674	1.9787	1.9945	1.9998	2.0088	2.0159
OddandEven_rep2_BW1_p14	0.1056	0.0946	0.0933	0.0965	0.1296	0.6402	1.0963	1.3701	1.4754	1.547	1.6275	1.6817	1.738	1.7928	1.8363	1.8685	1.9021	1.922	1.9471	1.9663	1.9867	1.9976	2.0125	2.0223	2.0396
OddandEven_rep2_BW2_p14	0.1034	0.0943	0.0932	0.0974	0.1474	0.7063	1.1022	1.3697	1.4591	1.543	1.6392	1.712	1.7842	1.821	1.8459	1.8842	1.9062	1.9229	1.9451	1.9633	1.9805	1.9869	1.9991	2.0155	2.0215
OddandEven_rep2_Triclosan_resistant_BW_p14	0.1046	0.093	0.0917	0.0943	0.1238	0.547	0.9971	1.2885	1.3897	1.4973	1.5999	1.6785	1.7296	1.7575	1.7818	1.8106	1.8385	1.8576	1.8846	1.9023	1.9196	1.9362	1.9497	1.9621	1.9757
Odd_rep2_zntA0.5_p16	0.0971	0.101	0.1039	0.1066	0.1074	0.1076	0.106	0.1067	0.1056	0.1038	0.1025	0.102	0.1021	0.1032	0.1029	0.1025	0.1021	0.1014	0.101	0.1011	0.1007	0.1006	0.1007	0.101	0.1005
Odd_rep2_yhip0.5_p16	0.0968	0.0946	0.0958	0.099	0.1	0.0994	0.0968	0.0972	0.0969	0.0966	0.0963	0.0966	0.0963	0.0966	0.0967	0.0959	0.0964	0.0958	0.0954	0.0958	0.0957	0.0958	0.0957	0.0961	0.096
Odd_rep2_phnP0.5_p16	0.0915	0.0887	0.0885	0.0904	0.0913	0.0909	0.089	0.0886	0.0888	0.0884	0.0886	0.0884	0.0886	0.089	0.0887	0.0881	0.0883	0.0879	0.0884	0.0883	0.0884	0.0883	0.0884	0.0888	0.0884
Odd_rep2_uhpT0.5_p16	0.0844	0.0819	0.0812	0.0836	0.0832	0.0832	0.0819	0.0819	0.0821	0.081	0.0814	0.0814	0.0816	0.0817	0.0815	0.081	0.0813	0.081	0.0809	0.0811	0.0813	0.0811	0.0815	0.0814	0.0813
Odd_rep2_cutC0.5_p16	0.0875	0.0846	0.0842	0.0838	0.0842	0.0838	0.0846	0.0846	0.0847	0.0841	0.0839	0.0844	0.0841	0.0849	0.0843	0.0843	0.0842	0.0843	0.0838	0.084	0.084	0.0837	0.0842	0.0842	0.084
Odd_rep2_cstA0.5_p16	0.0869	0.0842	0.0863	0.0868	0.0874	0.0871	0.0869	0.087	0.0867	0.086	0.0862	0.087	0.0871	0.0877	0.0874	0.0868	0.0872	0.087	0.087	0.0871	0.0875	0.0868	0.0868	0.0874	0.0869
Odd_rep2_yjjQ0.5_p16	0.0896	0.0856	0.0858	0.0868	0.0875	0.088	0.0883	0.0876	0.0877	0.0873	0.086	0.0856	0.0845	0.085	0.0849	0.0844	0.0841	0.0841	0.0841	0.0841	0.084	0.0844	0.0841	0.0842	0.0843
Odd_rep2_yjgL0.5_p16	0.0858	0.0827	0.0818	0.0824	0.0826	0.0829	0.0834	0.0834	0.0832	0.082	0.0824	0.0827	0.0829	0.0836	0.0841	0.0844	0.0849	0.0852	0.0853	0.0859	0.0857	0.0858	0.0857	0.0858	0.0857
Odd_rep2_glpT0.5_p16	0.0959	0.0901	0.0897	0.0899	0.0899	0.0903	0.0901	0.0914	0.0913	0.0903	0.089	0.0894	0.0888	0.0896	0.0906	0.0916	0.0915	0.0921	0.0921	0.0933	0.0929	0.0937	0.0932	0.0935	0.0933
Odd_rep2_mcrC0.5_p16	0.1061	0.1007	0.1005	0.0996	0.1003	0.1028	0.1009	0.0999	0.1017	0.1015	0.1012	0.1038	0.1027	0.1047	0.104	0.1049	0.1044	0.1045	0.104	0.1051	0.1034	0.1048	0.1045	0.1047	0.1047
OddandEven_rep2_BW10.5_p16	0.0869	0.0823	0.0827	0.0826	0.0832	0.0836	0.0832	0.0832	0.0831	0.084	0.0833	0.0842	0.0843	0.0853	0.0856	0.0857	0.086	0.0863	0.0864	0.0865	0.0868	0.0869	0.0867	0.0867	0.0865
OddandEven_rep2_BW20.5_p16	0.0861	0.0826	0.0841	0.0837	0.0838	0.0852	0.0862	0.0865	0.0873	0.0877	0.0868	0.0879	0.0874	0.0881	0.0881	0.0878	0.0879	0.0879	0.0878	0.0884	0.0881	0.0881	0.088	0.0883	0.0879
OddandEven_rep2_BW30.5_p16	0.0855	0.0829	0.0837	0.0827	0.0848	0.0877	0.0884	0.089	0.0897	0.0892	0.0886	0.0891	0.0888	0.0892	0.0891	0.0887	0.0887	0.0886	0.0885	0.0889	0.0889	0.0889	0.0886	0.0888	0.0887
OddandEven_rep2_Triclosan_resistant_BW0.5_p16	0.0903	0.0884	0.0887	0.088	0.0897	0.0895	0.0937	0.0976	0.1063	0.1183	0.1343	0.1615	0.2024	0.3002	0.5292	0.73	0.9266	1.1192	1.2802	1.3719	1.4678	1.5524	1.6194	1.6771	1.7434
Odd_rep2_zntA0.125_p16	0.1046	0.1027	0.1034	0.103	0.1029	0.1028	0.1031	0.1031	0.103	0.1023	0.1022	0.1027	0.1022	0.1028	0.1029	0.1356	0.3176	0.486	0.7014	0.8609	1.1075	1.2814	1.4117	1.5016	1.5675
Odd_rep2_yhip0.125_p16	0.1022	0.0992	0.0993	0.0987	0.0988	0.0984	0.0987	0.0994	0.0996	0.0997	0.0992	0.0991	0.099	0.0993	0.0993	0.0989	0.0995	0.0994	0.0996	0.1064	0.1408	0.2055	0.3058	0.4084	0.3708
Odd_rep2_phnP0.125_p16	0.0983	0.0954	0.0951	0.095	0.0948	0.0942	0.0953	0.0956	0.0955	0.0943	0.0941	0.0949	0.0946	0.096	0.0963	0.1697	0.3357	0.5298	0.7321	0.9824	1.0802	1.1468	1.36	1.4987	1.5941
Odd_rep2_uhpT0.125_p16	0.1018	0.0983	0.0989	0.0988	0.0997	0.0985	0.0992	0.0993	0.0984	0.0976	0.0975	0.0987	0.1009	0.1128	0.324	0.8722	1.2059	1.3498	1.4363	1.5075	1.5853	1.6595	1.7345	1.8049	1.8678
Odd_rep2_cutC0.125_p16	0.098	0.0955	0.0966	0.0956	0.0956	0.0952	0.0973	0.1717	0.2911	0.5202	0.7106	0.8948	1.0343	1.2096	1.4559	1.5193	1.5874	1.6344	1.6801	1.7152	1.7531	1.7775	1.813	1.8423	1.8725
Odd_rep2_cstA0.125_p16	0.1165	0.1106	0.1125	0.1128	0.1116	0.1108	0.1128	0.1252	0.1125	0.1117	0.1115	0.1174	0.1273	0.1124	0.1367	0.1129	0.1102	0.109	0.1101	0.1101	0.1124	0.1121	0.1099	0.1131	0.1105
Odd_rep2_yjjQ0.125_p16	0.1012	0.0961	0.0965	0.0968	0.0968	0.0963	0.0973	0.0976	0.1038	0.0958	0.096	0.0957	0.0954	0.0981	0.1109	0.1728	0.316	0.5207	0.6038	0.6897	0.8749	1.1376	1.3216	1.4078	1.4843
Odd_rep2_yjgL0.125_p16	0.0932	0.0905	0.0901	0.0903	0.0898	0.0904	0.0911	0.0914	0.0911	0.0898	0.0897	0.0905	0.1014	0.1734	0.3042	0.4657	0.5947	0.7011	0.8354	1.0686	1.5162	1.6226	1.687	1.7473	1.8069
Odd_rep2_glpT0.125_p16	0.0946	0.0915	0.0917	0.0931	0.0931	0.0928	0.0939	0.0939	0.0977	0.1129	0.1416	0.1947	0.3601	0.5451	0.7411	1.059	1.3976	1.4991	1.6028	1.6992	1.8057	1.8825	1.9655	2.0303	2.0967
Odd_rep2_mcrC0.125_p16	0.1036	0.0996	0.1007	0.1005	0.1001	0.1007	0.1013	0.1012	0.101	0.1011	0.102	0.1034	0.1043	0.124	0.2067	0.4264	0.7844	0.9895	1.1359	1.2915	1.4799	1.6022	1.6869	1.7664	1.8504
OddandEven_rep2_BW10.125_p16	0.1535	0.1526	0.1513	0.1512	0.152	0.152	0.1524	0.1531	0.1529	0.1507	0.1484	0.1478	0.1474	0.1547	0.2329	0.8215	1.1599	1.3629	1.504	1.5964	1.6729	1.7435	1.8055	1.8589	1.9009
OddandEven_rep2_BW20.125_p16	0.0933	0.0918	0.092	0.0919	0.0923	0.0921	0.0925	0.0925	0.0922	0.0918	0.091	0.0909	0.0902	0.0905	0.0906	0.0908	0.0915	0.092	0.0921	0.0921	0.0918	0.0917	0.0915	0.0915	0.091
OddandEven_rep2_BW30.125_p16	0.0994	0.0971	0.097	0.0969	0.0974	0.0979	0.0986	0.099	0.1038	0.1173	0.1542	0.2967	0.38	0.4703	0.4884	0.8103	1.1283	1.3524	1.5226	1.6605	1.7505	1.8297	1.8777	1.9204	1.9488
OddandEven_rep2_Triclosan_resistant_BW0.125_p16	0.0904	0.0877	0.088	0.0874	0.0878	0.0903	0.0929	0.1269	0.6153	1.2039	1.4016	1.5208	1.5777	1.6293	1.6816	1.7194	1.7504	1.7944	1.8317	1.8422	1.8673	1.8923	1.9016	1.9192	1.9294
Odd_rep2_zntA0.015_p16	0.1041	0.1044	0.1051	0.1103	0.1773	0.7658	1.0904	1.2993	1.3998	1.4573	1.5407	1.6119	1.678	1.7146	1.7589	1.7849	1.802	1.8117	1.8257	1.8252	1.8319	1.8405	1.853	1.8553	1.8693
Odd_rep2_yhip0.015_p16	0.1016	0.1009	0.1006	0.1062	0.1526	0.4487	0.7282	1.0051	1.2058	1.3837	1.5398	1.6761	1.8016	1.869	1.9064	1.9377	1.9611	1.9733	1.9861	1.9835	1.9973	1.9941	2.0075	2.0025	2.0107
Odd_rep2_phnP0.015_p16	0.0973	0.0961	0.0968	0.103	0.1588	0.8858	1.0584	1.2883	1.3688	1.4974	1.6181	1.7182	1.7796	1.8196	1.86	1.894	1.9096	1.9171	1.9401	1.9421	1.9508	1.9537	1.9585	1.9592	1.9646
Odd_rep2_uhpT0.015_p16	0.0914	0.0903	0.0918	0.0967	0.1566	0.9372	1.0378	1.2287	1.3372	1.4751	1.6057	1.7065	1.7654	1.8147	1.8515	1.8802	1.9042	1.919	1.9348	1.9397	1.9534	1.9579	1.9629	1.9659	1.9753
Odd_rep2_cutC0.015_p16	0.0872	0.0851	0.0861	0.0912	0.1232	0.2139	0.7925	1.0314	1.1544	1.3163	1.4509	1.5717	1.6414	1.7067	1.7596	1.798	1.8271	1.8417	1.871	1.8785	1.8961	1.9034	1.9153	1.9128	1.9223
Odd_rep2_cstA0.015_p16	0.0938	0.0923	0.093	0.0989	0.1469	0.3561	1.0343	1.305	1.3887	1.4971	1.5884	1.6811	1.7233	1.7645	1.8112	1.8332	1.8457	1.8619	1.8868	1.8955	1.9061	1.9192	1.9277	1.9291	1.9354
Odd_rep2_yjjQ0.015_p16	0.0925	0.0907	0.0921	0.0949	0.1267	0.69	1.044	1.2999	1.4183	1.474	1.5411	1.6099	1.6591	1.7056	1.7448	1.787	1.7943	1.8085	1.8382	1.8522	1.8588	1.8655	1.8731	1.8722	1.8777
Odd_rep2_yjgL0.015_p16	0.103	0.1062	0.1274	0.1334	0.2006	0.6794	1.1315	1.2778	1.3853	1.5044	1.611	1.6986	1.762	1.8101	1.8662	1.8924	1.9225	1.9359	1.9421	1.9444	1.9518	1.9599	1.9684	1.9676	1.9697
Odd_rep2_glpT0.015_p16	0.0912	0.0895	0.0921	0.0992	0.1497	0.7512	1.1333	1.3231	1.3925	1.4911	1.5851	1.6752	1.7422	1.7904	1.8396	1.8799	1.8929	1.9069	1.9198	1.9303	1.9368	1.944	1.9569	1.9591	1.968
Odd_rep2_mcrC0.015_p16	0.0865	0.0855	0.0895	0.0956	0.167	0.821	1.1535	1.373	1.4532	1.5653	1.6494	1.745	1.7967	1.8473	1.8758	1.9302	1.9307	1.9504	1.9587	1.9672	1.9687	1.9724	1.9811	1.9767	1.9903
OddandEven_rep2_BW10.015_p16	0.0883	0.0882	0.0924	0.0966	0.1674	0.5671	0.877	1.125	1.261	1.3644	1.4461	1.5326	1.5939	1.6421	1.6731	1.7044	1.7356	1.7508	1.779	1.7887	1.7999	1.8066	1.8131	1.8075	1.8136
OddandEven_rep2_BW20.015_p16	0.0848	0.0847	0.0855	0.0927	0.1781	0.811	1.1135	1.2832	1.4045	1.4842	1.5576	1.6259	1.6882	1.7304	1.7681	1.7978	1.831	1.8477	1.8663	1.8602	1.8742	1.8672	1.8732	1.8688	1.8736
OddandEven_rep2_BW30.015_p16	0.084	0.0832	0.0858	0.0933	0.1682	0.868	1.225	1.4317	1.5553	1.612	1.6711	1.7346	1.7916	1.8276	1.8648	1.8899	1.8964	1.9039	1.9109	1.9119	1.9191	1.9247	1.9306	1.9351	1.943
OddandEven_rep2_Triclosan_resistant_BW0.015_p16	0.0816	0.0803	0.0803	0.084	0.1278	0.5128	1.0825	1.3239	1.4279	1.5017	1.5597	1.6218	1.6704	1.7153	1.7364	1.7617	1.7774	1.7855	1.8094	1.8157	1.8354	1.8349	1.8425	1.8451	1.8439
Odd_rep2_zntA_p16	0.1047	0.1061	0.1064	0.1108	0.1707	0.6965	1.0509	1.2352	1.3382	1.4057	1.4884	1.5606	1.6083	1.6543	1.6921	1.7306	1.7514	1.771	1.7863	1.7963	1.8098	1.8202	1.8302	1.84	1.8482
Odd_rep2_yhip_p16	0.0879	0.0861	0.0868	0.0927	0.134	0.3584	0.6471	0.8656	1.0715	1.2783	1.4397	1.561	1.6296	1.6934	1.7402	1.7727	1.79	1.8146	1.8336	1.8449	1.8594	1.8684	1.8807	1.8857	1.8921
Odd_rep2_phnP_p16	0.0846	0.084	0.0847	0.0899	0.1615	0.8057	0.9508	1.1676	1.2885	1.4353	1.5614	1.6631	1.7147	1.7645	1.8069	1.8363	1.8571	1.8764	1.8987	1.9053	1.9169	1.925	1.9335	1.9337	1.9409
Odd_rep2_uhpT_p16	0.0859	0.0833	0.084	0.0896	0.1544	0.8192	0.9808	1.1629	1.3026	1.4465	1.5807	1.6891	1.7522	1.8046	1.843	1.8718	1.8998	1.9231	1.9392	1.947	1.9647	1.9703	1.9838	1.9798	1.9879
Odd_rep2_cutC_p16	0.0826	0.0814	0.0817	0.0847	0.1046	0.1957	0.4543	0.6885	1.024	1.2317	1.412	1.5338	1.603	1.6743	1.7335	1.7705	1.8005	1.8218	1.8458	1.8622	1.8805	1.8916	1.9018	1.9118	1.9209
Odd_rep2_cstA_p16	0.0838	0.0824	0.0823	0.0867	0.125	0.2235	0.941	1.2008	1.3247	1.4445	1.5506	1.6426	1.6855	1.7447	1.7835	1.812	1.8245	1.8394	1.8595	1.8766	1.8941	1.9007	1.9126	1.9182	1.9293
Odd_rep2_yjjQ_p16	0.081	0.0801	0.0808	0.0842	0.1241	0.3801	0.9952	1.2439	1.3545	1.4227	1.5058	1.5717	1.6467	1.6874	1.7227	1.7588	1.7779	1.7969	1.8128	1.8342	1.8456	1.8547	1.8668	1.8698	1.8792
Odd_rep2_yjgL_p16	0.1081	0.1102	0.1116	0.1179	0.1567	0.286	1.0684	1.2035	1.3115	1.4447	1.559	1.6488	1.7116	1.7655	1.809	1.8379	1.8526	1.8726	1.8918	1.9036	1.9174	1.9209	1.9309	1.9419	1.9469
Odd_rep2_glpT_p16	0.0811	0.0813	0.0845	0.091	0.1253	0.6822	1.0442	1.3013	1.3722	1.4892	1.5843	1.6668	1.731	1.7855	1.8308	1.8662	1.8801	1.9002	1.9249	1.9305	1.9477	1.95	1.963	1.966	1.9811
Odd_rep2_mcrC_p16	0.0789	0.08	0.0846	0.0895	0.1596	0.7356	1.0862	1.3357	1.4346	1.5406	1.6216	1.7026	1.7852	1.8293	1.8714	1.9011	1.9195	1.939	1.9572	1.965	1.978	1.9796	1.9966	1.9932	2.0045
OddandEven_rep2_BW1_p16	0.0796	0.0781	0.0788	0.0855	0.1323	0.3916	0.7907	1.1387	1.2589	1.366	1.4543	1.5365	1.612	1.6437	1.6725	1.7019	1.7272	1.7431	1.7692	1.7827	1.8003	1.7985	1.8155	1.8152	1.8237
OddandEven_rep2_BW2_p16	0.0779	0.077	0.0776	0.0823	0.1114	0.6159	1.0489	1.2941	1.411	1.4948	1.5744	1.6429	1.6917	1.7262	1.7545	1.7721	1.7898	1.8036	1.8143	1.8238	1.8284	1.8269	1.8421	1.8478	1.8587
OddandEven_rep2_BW3_p16	0.0807	0.0814	0.0823	0.0865	0.1326	0.7225	1.1593	1.3934	1.5118	1.568	1.6262	1.6923	1.7489	1.7806	1.8049	1.8119	1.8101	1.8322	1.8516	1.8735	1.8753	1.8796	1.8919	1.901	1.9159
OddandEven_rep2_Triclosan_resistant_BW_p16	0.0883	0.0884	0.0887	0.0912	0.1053	0.3863	1.1103	1.3815	1.4866	1.5551	1.6115	1.6662	1.7058	1.7503	1.7915	1.8275	1.8402	1.8591	1.8679	1.8834	1.8976	1.8998	1.9183	1.9253	1.9259
Even_rep2_soxR0.5_p11	0.1163	0.1129	0.1099	0.1086	0.1076	0.1073	0.1066	0.1063	0.1055	0.1055	0.1049	0.1044	0.104	0.1035	0.1036	0.1028	0.1021	0.1015	0.0996	0.0983	0.0985	0.0993	0.0973	0.0988	0.1
Even_rep2_fadR0.5_p11	0.1121	0.1004	0.0991	0.0976	0.096	0.0954	0.095	0.0944	0.0943	0.0933	0.0926	0.092	0.0911	0.0916	0.091	0.0909	0.0906	0.0902	0.0904	0.0892	0.0893	0.0896	0.0885	0.0884	0.0895
Even_rep2_frdD0.5_p11	0.113	0.101	0.0985	0.0973	0.0953	0.0952	0.0943	0.0933	0.0918	0.0921	0.0914	0.0908	0.0902	0.09	0.0897	0.0895	0.0897	0.0891	0.0892	0.0894	0.0887	0.0895	0.0888	0.0888	0.0883
Even_rep2_nuoG0.5_p11	0.1155	0.1027	0.0998	0.0981	0.0965	0.0961	0.0951	0.094	0.0936	0.0932	0.0924	0.0922	0.0918	0.0913	0.0915	0.0906	0.0908	0.0907	0.0905	0.0905	0.09	0.0906	0.0899	0.0899	0.0897
Even_rep2_rbsB0.5_p11	0.1071	0.0972	0.0942	0.0936	0.0914	0.0915	0.0902	0.0903	0.0892	0.0888	0.0885	0.0884	0.0883	0.0878	0.0879	0.0875	0.0869	0.0872	0.0866	0.0881	0.087	0.0873	0.0868	0.0869	0.0865
Even_rep2_ompF0.5_p11	0.1048	0.0945	0.0921	0.0908	0.0893	0.0893	0.0886	0.0876	0.0873	0.0879	0.0866	0.087	0.0865	0.0865	0.0863	0.086	0.0857	0.0852	0.0852	0.0853	0.0847	0.0856	0.0854	0.0853	0.0849
Even_rep2_fadL0.5_p11	0.1269	0.114	0.1118	0.1102	0.1086	0.1084	0.1077	0.1075	0.1066	0.1064	0.1062	0.1054	0.1058	0.1051	0.1044	0.1042	0.1038	0.104	0.1029	0.1035	0.1026	0.1033	0.1034	0.1031	0.1032
Even_rep2_lon0.5_p11	0.1049	0.0957	0.093	0.091	0.0893	0.0893	0.0886	0.0878	0.0873	0.0878	0.0869	0.0871	0.0867	0.0863	0.086	0.0859	0.0854	0.0856	0.0855	0.086	0.0851	0.0854	0.0855	0.0857	0.085
Even_rep2_prc0.5_p11	0.1039	0.0939	0.0914	0.0901	0.0888	0.0889	0.0879	0.0869	0.0862	0.0873	0.0861	0.0869	0.0859	0.0854	0.0854	0.0852	0.0852	0.0849	0.0849	0.0851	0.0842	0.0848	0.0849	0.0848	0.084
Even_rep2_mrcA0.5_p11	0.1011	0.0914	0.0889	0.0874	0.0864	0.0861	0.0854	0.0851	0.0841	0.0845	0.0842	0.0841	0.0832	0.0833	0.0834	0.0829	0.083	0.0827	0.0824	0.0833	0.0826	0.0826	0.0826	0.0826	0.0826
Even_rep2_yehK0.5_p11	0.1009	0.0922	0.09	0.0884	0.0868	0.0869	0.0862	0.0859	0.0852	0.0854	0.0851	0.0848	0.0846	0.0843	0.0841	0.0842	0.0839	0.0839	0.083	0.084	0.0833	0.0837	0.0835	0.0835	0.0832
Even_rep2_ybfQ0.5_p11	0.1017	0.0928	0.0907	0.0889	0.088	0.088	0.0871	0.0866	0.0864	0.086	0.0857	0.0858	0.0853	0.0854	0.0853	0.0846	0.0846	0.0844	0.0841	0.0851	0.0841	0.0844	0.0844	0.084	0.0839
Even_rep2_truD0.5_p11	0.0985	0.0888	0.0866	0.0853	0.0841	0.0838	0.0833	0.0827	0.0827	0.0827	0.0823	0.0819	0.0818	0.0813	0.0817	0.0811	0.0809	0.0809	0.0804	0.0805	0.0802	0.0803	0.0803	0.0803	0.0802
Even_rep2_mprA0.5_p11	0.1004	0.0915	0.0896	0.0881	0.0869	0.0869	0.0864	0.086	0.0857	0.0856	0.0854	0.0852	0.085	0.0847	0.0851	0.0846	0.0846	0.0842	0.0841	0.0846	0.0842	0.0845	0.0843	0.0838	0.0837
Even_rep2_ubiF0.5_p11	0.0996	0.0911	0.0885	0.0878	0.0863	0.0862	0.0862	0.0854	0.0855	0.0851	0.0853	0.0854	0.0847	0.0842	0.0844	0.0838	0.0839	0.0831	0.0828	0.0839	0.0831	0.0834	0.0831	0.0832	0.083
Even_rep2_ybeX0.5_p11	0.1081	0.0989	0.0972	0.0964	0.0946	0.0949	0.0941	0.0932	0.0933	0.0934	0.0932	0.0931	0.0927	0.0922	0.0925	0.0922	0.0919	0.0912	0.0909	0.0913	0.0908	0.0912	0.0908	0.0911	0.091
Even_rep2_rep0.5_p11	0.1026	0.0936	0.0919	0.0907	0.0893	0.0898	0.0898	0.0888	0.0882	0.0885	0.0882	0.0881	0.0879	0.0876	0.0872	0.0866	0.0874	0.0866	0.0862	0.0868	0.086	0.086	0.0863	0.0863	0.0865
Even_rep2_fadD0.5_p11	0.0984	0.0897	0.0883	0.0871	0.0856	0.0859	0.085	0.0847	0.0849	0.0848	0.0852	0.0849	0.0846	0.0846	0.0844	0.0845	0.0849	0.0847	0.084	0.0845	0.0846	0.0851	0.0841	0.0844	0.0846
Even_rep2_ydjO0.5_p11	0.0981	0.0887	0.0867	0.0846	0.0839	0.0841	0.0846	0.0839	0.083	0.0832	0.083	0.0824	0.0822	0.0816	0.0815	0.0812	0.0812	0.0811	0.0804	0.081	0.0803	0.0805	0.0803	0.0805	0.0805
Even_rep2_yedN0.5_p11	0.1011	0.0914	0.0896	0.0885	0.0874	0.0876	0.088	0.0878	0.0862	0.0871	0.0858	0.086	0.0854	0.0862	0.0851	0.0845	0.0842	0.0841	0.0832	0.0837	0.0833	0.0835	0.0833	0.0834	0.0836
Even_rep2_yhbJ0.5_p11	0.0982	0.0888	0.0865	0.0853	0.0844	0.0847	0.0845	0.0846	0.0826	0.0848	0.0825	0.0828	0.0819	0.0817	0.0818	0.0815	0.0807	0.0808	0.0804	0.0809	0.0805	0.0803	0.0807	0.0807	0.08
Even_rep2_BW10.5_p11	0.1007	0.0909	0.0883	0.0871	0.0859	0.0862	0.0856	0.0855	0.0846	0.085	0.0842	0.0842	0.084	0.0832	0.0835	0.0829	0.083	0.0828	0.0822	0.0828	0.0823	0.0823	0.0824	0.0825	0.0824
Even_rep2_BW20.5_p11	0.1	0.0906	0.0885	0.0871	0.0856	0.0857	0.0856	0.0849	0.084	0.0845	0.0835	0.0835	0.0836	0.0833	0.0829	0.0825	0.0825	0.0826	0.0817	0.0823	0.082	0.0817	0.0821	0.0822	0.0818
Even_rep2_Tric-resistant0.5_p11	0.099	0.0895	0.0872	0.0864	0.0857	0.0889	0.0933	0.1084	0.1323	0.1858	0.2418	0.3523	0.4818	0.7537	1.0689	1.264	1.4268	1.5298	1.6098	1.6649	1.7387	1.7852	1.822	1.8648	1.8944
Even_rep2_soxR0.125_p11	0.1164	0.105	0.1033	0.1021	0.1013	0.103	0.1217	0.2278	0.4181	0.6478	0.9804	1.3201	1.4439	1.5552	1.629	1.6945	1.7522	1.8097	1.8675	1.9236	1.9734	2.013	2.0321	2.046	2.0517
Even_rep2_fadR0.125_p11	0.1535	0.1136	0.1057	0.1045	0.1044	0.109	0.1273	0.2245	0.3951	0.6372	0.9091	1.1532	1.3099	1.4135	1.4918	1.5692	1.634	1.689	1.74	1.7885	1.8215	1.8579	1.8836	1.9166	1.9363
Even_rep2_frdD0.125_p11	0.1156	0.1056	0.1028	0.1021	0.1004	0.0998	0.1001	0.0991	0.1309	0.3587	0.4941	0.7531	0.9413	0.9231	1.1239	1.299	1.4223	1.5151	1.5545	1.6081	1.6541	1.7176	1.7844	1.857	1.9072
Even_rep2_nuoG0.125_p11	0.1143	0.1034	0.1016	0.1	0.0989	0.0984	0.0985	0.1008	0.1247	0.2162	0.3798	0.5793	0.7546	0.919	1.3629	1.4441	1.5366	1.6164	1.6726	1.713	1.7398	1.7753	1.7968	1.8188	1.8439
Even_rep2_rbsB0.125_p11	0.1013	0.0926	0.0904	0.0892	0.0879	0.088	0.0873	0.0877	0.1289	0.267	0.439	0.6211	0.9467	1.3193	1.541	1.62	1.6837	1.7404	1.7975	1.8629	1.9124	1.9601	1.9968	2.0187	2.037
Even_rep2_ompF0.125_p11	0.1024	0.0934	0.0912	0.0909	0.0887	0.0893	0.0889	0.0921	0.1063	0.2778	0.5025	0.7518	0.9345	1.1982	1.5031	1.625	1.6536	1.7005	1.7652	1.8155	1.8728	1.9365	1.9871	2.0104	2.0231
Even_rep2_fadL0.125_p11	0.1325	0.1216	0.1172	0.1175	0.116	0.117	0.1235	0.1575	0.2374	0.3645	0.6444	1.0434	1.3022	1.4554	1.5601	1.6253	1.7042	1.7692	1.8395	1.9034	1.9514	1.98	1.9991	2.0173	2.036
Even_rep2_lon0.125_p11	0.1294	0.119	0.1167	0.1159	0.1149	0.1215	0.2372	0.675	1.101	1.5106	1.6187	1.696	1.7718	1.8521	1.9315	1.9741	2.0028	2.0189	2.0436	2.0624	2.0717	2.0757	2.0802	2.0942	2.0933
Even_rep2_prc0.125_p11	0.1117	0.1025	0.0999	0.0987	0.0989	0.1102	0.2836	0.4913	0.6814	0.8329	1.0345	1.1837	1.4533	1.5728	1.6394	1.6795	1.7254	1.7778	1.8145	1.8797	1.897	1.9114	1.9089	1.9119	1.8951
Even_rep2_mrcA0.125_p11	0.0972	0.0882	0.0866	0.0853	0.084	0.0841	0.0833	0.0835	0.0831	0.083	0.0842	0.0896	0.1053	0.1507	0.2072	0.2655	0.3502	0.4934	0.6545	0.7632	0.8416	1.1047	1.3274	1.4825	1.5883
Even_rep2_yehK0.125_p11	0.1044	0.0945	0.0922	0.0917	0.0906	0.0943	0.106	0.1617	0.3134	0.4928	0.9776	1.2561	1.4344	1.5566	1.6418	1.7098	1.7744	1.8368	1.8818	1.9228	1.9802	2.0169	2.0446	2.0587	2.0723
Even_rep2_ybfQ0.125_p11	0.1045	0.0952	0.0931	0.0919	0.0901	0.0901	0.0899	0.0889	0.0904	0.094	0.119	0.6687	1.3138	1.4709	1.5746	1.6391	1.6911	1.7324	1.7614	1.8014	1.8556	1.889	1.9109	1.9259	1.9664
Even_rep2_truD0.125_p11	0.1089	0.0976	0.0949	0.0934	0.0919	0.0918	0.0922	0.0985	0.136	0.2622	0.4874	0.7291	1.0884	1.4377	1.5473	1.6363	1.7276	1.8133	1.8906	1.9242	1.9763	1.9897	2.011	2.0338	2.0493
Even_rep2_mprA0.125_p11	0.1068	0.0965	0.0941	0.0929	0.0918	0.0935	0.1357	0.3288	0.5471	0.776	1.2187	1.4259	1.527	1.6341	1.7574	1.8466	1.8858	1.9187	1.9442	1.9808	1.9981	2.0118	2.0241	2.0309	2.0417
Even_rep2_ubiF0.125_p11	0.114	0.104	0.1013	0.1004	0.1004	0.1053	0.1251	0.3077	0.4883	0.9002	1.1836	1.3322	1.3913	1.4389	1.4907	1.5378	1.5837	1.6255	1.6637	1.7028	1.7385	1.7608	1.7905	1.8133	1.8367
Even_rep2_ybeX0.125_p11	0.1149	0.1033	0.1008	0.1002	0.1024	0.1241	0.2458	0.4331	0.6114	0.8713	1.2633	1.4279	1.5303	1.6042	1.6673	1.7314	1.7781	1.8251	1.8621	1.9098	1.9388	1.9869	2.003	2.0145	2.0389
Even_rep2_rep0.125_p11	0.1071	0.0977	0.0955	0.0943	0.0932	0.0953	0.1095	0.1481	0.2704	0.4325	0.7917	1.13	1.4523	1.6056	1.6811	1.7599	1.8545	1.9321	1.9874	2.0062	2.0233	2.0366	2.0587	2.0782	2.0912
Even_rep2_fadD0.125_p11	0.1104	0.1013	0.0994	0.0988	0.0981	0.0993	0.1106	0.1909	0.3707	0.5599	0.8468	0.8697	1.1664	1.2907	1.4402	1.5357	1.6342	1.6725	1.7154	1.7565	1.8004	1.8336	1.865	1.897	1.9311
Even_rep2_ydjO0.125_p11	0.1157	0.1051	0.1036	0.1026	0.1016	0.1016	0.1024	0.1062	0.1258	0.2339	0.3544	0.5658	0.7587	1.0531	1.3018	1.4593	1.562	1.63	1.7027	1.7601	1.808	1.8635	1.9076	1.9581	1.9982
Even_rep2_yedN0.125_p11	0.1213	0.1112	0.1083	0.1075	0.1074	0.1124	0.1399	0.2433	0.3663	0.6838	1.2469	1.4852	1.5871	1.6791	1.783	1.8614	1.9381	1.9496	1.9988	2.0134	2.0302	2.0414	2.0433	2.0642	2.0711
Even_rep2_yhbJ0.125_p11	0.1105	0.1006	0.0988	0.0993	0.1	0.1217	0.2714	0.7943	1.1863	1.5051	1.6848	1.7722	1.833	1.9008	1.9778	2.0264	2.0795	2.0819	2.113	2.1197	2.1337	2.1441	2.1445	2.1608	2.1687
Even_rep2_BW10.125_p11	0.1049	0.0964	0.0942	0.093	0.0913	0.0917	0.0916	0.0913	0.091	0.0919	0.1018	0.1439	0.2415	0.3561	0.6018	0.8972	1.0407	1.2044	1.4992	1.651	1.7471	1.8171	1.8934	1.9321	1.9751
Even_rep2_BW20.125_p11	0.0999	0.0918	0.0897	0.0882	0.087	0.0869	0.0866	0.0863	0.0857	0.0859	0.0852	0.0852	0.0846	0.0846	0.0846	0.0839	0.084	0.0838	0.0831	0.0838	0.0843	0.1031	0.1706	0.3533	0.7542
Even_rep2_Tric-resistant0.125_p11	0.104	0.0944	0.0921	0.0907	0.0911	0.0961	0.1039	0.3573	0.7777	1.2264	1.4529	1.6	1.6863	1.7355	1.7916	1.8272	1.8621	1.8928	1.9226	1.946	1.957	1.9757	1.9909	2.0012	2.0237
Even_rep2_soxR0.015_p11	0.1127	0.1033	0.1021	0.11	0.2292	0.8648	1.2248	1.5754	1.6601	1.7258	1.7916	1.8485	1.8948	1.9424	1.982	1.9984	2.0251	2.0322	2.0481	2.0645	2.0766	2.0747	2.0798	2.0903	2.0998
Even_rep2_fadR0.015_p11	0.113	0.1022	0.1016	0.1077	0.1911	0.9903	1.358	1.5478	1.6411	1.7151	1.7765	1.864	1.9182	1.9683	1.9924	2.0143	2.0374	2.0462	2.0611	2.0683	2.0701	2.074	2.0956	2.0976	2.1068
Even_rep2_frdD0.015_p11	0.1088	0.0995	0.0982	0.105	0.1997	0.7128	1.0929	1.2583	1.392	1.5136	1.5871	1.687	1.7479	1.8006	1.8363	1.8674	1.8916	1.9023	1.9197	1.943	1.9514	1.9565	1.9722	1.9818	1.9893
Even_rep2_nuoG0.015_p11	0.1094	0.1012	0.0996	0.1029	0.2113	0.5364	0.831	1.5017	1.5051	1.557	1.6278	1.69	1.7247	1.7467	1.7773	1.8028	1.8393	1.864	1.8907	1.9223	1.9377	1.9516	1.9708	1.9843	1.9907
Even_rep2_rbsB0.015_p11	0.1146	0.1058	0.1052	0.115	0.3212	0.8829	1.2859	1.5908	1.6594	1.7401	1.823	1.8869	1.94	1.9729	2.0044	2.0211	2.0406	2.0556	2.0642	2.0797	2.0853	2.0976	2.099	2.1069	2.1212
Even_rep2_ompF0.015_p11	0.1358	0.127	0.1264	0.1358	0.2658	0.7209	1.1235	1.5268	1.5902	1.6605	1.7262	1.7917	1.8541	1.9117	1.9352	1.9542	1.9732	1.9833	1.9948	2.0048	2.016	2.0316	2.0378	2.0451	2.069
Even_rep2_fadL0.015_p11	0.1159	0.1069	0.1066	0.1141	0.2216	0.5531	1.0554	1.5588	1.625	1.6877	1.7581	1.8143	1.8653	1.9176	1.9465	1.9617	1.9869	1.9971	2.0082	2.0218	2.0256	2.0326	2.0418	2.0534	2.061
Even_rep2_lon0.015_p11	0.1355	0.1259	0.1254	0.1328	0.1888	0.7281	1.1686	1.4463	1.5337	1.6352	1.716	1.7867	1.8385	1.8804	1.9143	1.9398	1.9644	1.9762	1.9977	2.0083	2.0257	2.0363	2.049	2.049	2.0622
Even_rep2_prc0.015_p11	0.112	0.1024	0.101	0.1067	0.2239	0.4992	0.8719	1.1253	1.3126	1.4097	1.5044	1.598	1.6606	1.6661	1.6801	1.7122	1.7124	1.7242	1.7458	1.7619	1.7627	1.7699	1.7689	1.7766	1.7814
Even_rep2_mrcA0.015_p11	0.1063	0.0975	0.0967	0.1025	0.1829	0.473	0.9664	1.2925	1.3916	1.5066	1.6113	1.7034	1.7886	1.8291	1.8727	1.8986	1.9233	1.9377	1.9625	1.9785	1.9929	2.0036	2.0175	2.0283	2.0477
Even_rep2_yehK0.015_p11	0.1049	0.0954	0.0946	0.0988	0.1616	0.6529	1.0793	1.4841	1.6255	1.7031	1.7663	1.8278	1.8732	1.9255	1.9637	1.985	2.011	2.0275	2.0409	2.0472	2.0672	2.0737	2.0802	2.0899	2.1054
Even_rep2_ybfQ0.015_p11	0.1004	0.0906	0.0888	0.0978	0.1867	0.4477	1.0433	1.3897	1.5403	1.6459	1.7125	1.7811	1.8192	1.865	1.9008	1.9134	1.9334	1.9463	1.9659	1.9797	1.9836	1.9918	2.0001	2.0114	2.0239
Even_rep2_truD0.015_p11	0.1242	0.113	0.1108	0.115	0.156	0.7248	1.1957	1.5307	1.5947	1.6886	1.7837	1.8637	1.9086	1.9406	1.9717	1.9873	2.0103	2.0269	2.0417	2.0582	2.0679	2.0703	2.0776	2.0923	2.1035
Even_rep2_mprA0.015_p11	0.1077	0.097	0.096	0.1019	0.1863	0.7418	1.2409	1.4512	1.5356	1.6196	1.71	1.7977	1.7938	1.8232	1.848	1.8787	1.9042	1.9188	1.9345	1.9532	1.9534	1.9599	1.9734	1.9821	1.9908
Even_rep2_ubiF0.015_p11	0.1009	0.0917	0.0905	0.092	0.1162	0.229	0.625	0.8874	1.0418	1.1563	1.2492	1.326	1.3997	1.4716	1.539	1.5974	1.6548	1.6923	1.7183	1.7539	1.7709	1.7882	1.8031	1.8208	1.8353
Even_rep2_ybeX0.015_p11	0.1065	0.0973	0.0963	0.1033	0.1609	0.8974	1.238	1.6138	1.6984	1.7562	1.8168	1.8674	1.9106	1.9519	1.9876	1.9973	2.016	2.0237	2.0417	2.0598	2.0653	2.0729	2.0758	2.0935	2.1039
Even_rep2_rep0.015_p11	0.1086	0.0993	0.0988	0.1021	0.1428	0.2257	0.6324	1.0521	1.3105	1.5128	1.6627	1.7821	1.8281	1.8738	1.9128	1.9366	1.9637	1.9818	1.9968	2.0117	2.0243	2.037	2.0387	2.0554	2.0608
Even_rep2_fadD0.015_p11	0.1122	0.1026	0.1024	0.1118	0.2229	0.4353	0.967	1.2068	1.4145	1.5365	1.619	1.6986	1.7522	1.8049	1.8617	1.901	1.9159	1.9326	1.9442	1.9546	1.959	1.9713	1.9655	1.9798	1.9935
Even_rep2_ydjO0.015_p11	0.1399	0.1298	0.1282	0.1372	0.2835	0.9295	1.1874	1.4836	1.6153	1.6951	1.7687	1.8272	1.8707	1.9203	1.9661	1.9775	1.9996	2.0104	2.014	2.0303	2.033	2.039	2.0414	2.0606	2.0744
Even_rep2_yedN0.015_p11	0.1149	0.1066	0.1055	0.1107	0.1776	0.5842	0.9978	1.4802	1.5688	1.6468	1.7292	1.8	1.8575	1.9081	1.9409	1.9585	1.9778	1.9832	1.9901	2.0059	2.0152	2.0157	2.0246	2.0433	2.0552
Even_rep2_yhbJ0.015_p11	0.1113	0.1025	0.1014	0.1066	0.1842	1.0197	1.3154	1.5248	1.6551	1.743	1.8326	1.9006	1.9594	1.9862	2.0238	2.0396	2.058	2.0762	2.0925	2.1122	2.1207	2.1313	2.1463	2.161	2.1761
Even_rep2_BW10.015_p11	0.1084	0.0993	0.0985	0.1086	0.3598	0.865	1.1556	1.4874	1.5954	1.6788	1.7606	1.8327	1.8855	1.9501	1.9748	1.9912	2.0061	2.0215	2.0337	2.0455	2.0457	2.0521	2.0647	2.0803	2.0878
Even_rep2_BW20.015_p11	0.1069	0.0965	0.0958	0.1064	0.3755	0.9241	1.215	1.4493	1.5678	1.6586	1.734	1.8016	1.8548	1.9171	1.9617	1.9783	1.9934	2.0086	2.0217	2.0333	2.0381	2.0488	2.0489	2.0578	2.0635
Even_rep2_Tric-resistant0.015_p11	0.1038	0.0936	0.0928	0.101	0.2675	0.9085	1.1856	1.4263	1.5379	1.6216	1.6944	1.7616	1.8054	1.8548	1.9153	1.942	1.9643	1.9768	1.9933	2.012	2.0226	2.0277	2.0322	2.0481	2.0597
Even_rep2_soxR_p11	0.0959	0.0865	0.0851	0.0949	0.1966	0.7362	1.1541	1.5333	1.6248	1.6922	1.7601	1.8204	1.8641	1.9132	1.9428	1.9599	1.9875	1.9964	2.0121	2.0255	2.0348	2.0371	2.0514	2.061	2.0701
Even_rep2_fadR_p11	0.1097	0.0989	0.0976	0.103	0.1826	0.983	1.3645	1.5481	1.6303	1.7003	1.7777	1.8499	1.917	1.9554	1.986	2.0031	2.0274	2.0381	2.0563	2.0618	2.0682	2.0744	2.0886	2.1003	2.0997
Even_rep2_frdD_p11	0.1057	0.0954	0.0937	0.0994	0.1588	0.783	1.0774	1.2536	1.3662	1.4869	1.5928	1.7005	1.7523	1.7837	1.815	1.8358	1.8635	1.8788	1.8924	1.9052	1.9186	1.933	1.9493	1.9568	1.9669
Even_rep2_nuoG_p11	0.1064	0.0959	0.0943	0.0969	0.1497	0.4117	0.6221	1.4596	1.5034	1.5566	1.6361	1.682	1.7189	1.7432	1.7762	1.8044	1.8401	1.863	1.9077	1.927	1.9409	1.9495	1.9647	1.9765	1.9934
Even_rep2_rbsB_p11	0.1165	0.1075	0.1065	0.1137	0.215	0.7975	1.2435	1.556	1.6368	1.7201	1.8098	1.8787	1.944	1.9556	1.9857	2.001	2.0244	2.033	2.0446	2.0638	2.0724	2.0799	2.0822	2.0984	2.1121
Even_rep2_ompF_p11	0.1065	0.0972	0.0953	0.1007	0.1969	0.7458	1.153	1.4718	1.5641	1.6375	1.7221	1.7977	1.8719	1.93	1.9643	1.9784	1.9993	2.0147	2.0206	2.0386	2.0444	2.0512	2.065	2.0792	2.0839
Even_rep2_fadL_p11	0.1254	0.1145	0.1124	0.1174	0.1896	0.4279	1.0027	1.5474	1.624	1.6831	1.753	1.8091	1.8664	1.897	1.9282	1.948	1.9693	1.9794	2.0023	2.014	2.0228	2.0347	2.0434	2.0606	2.0751
Even_rep2_lon_p11	0.104	0.0958	0.0949	0.0975	0.1394	0.6664	1.1132	1.3782	1.4915	1.5984	1.7136	1.7928	1.8582	1.8936	1.9265	1.9474	1.9714	1.9918	2.0103	2.0272	2.0374	2.0437	2.0585	2.0676	2.0818
Even_rep2_prc_p11	0.1058	0.0959	0.0944	0.0968	0.1723	0.4724	0.674	0.9937	1.24	1.3276	1.4558	1.5732	1.6729	1.7037	1.7071	1.7317	1.7194	1.7121	1.7202	1.7383	1.7543	1.7647	1.7631	1.7756	1.7804
Even_rep2_mrcA_p11	0.0973	0.0884	0.0863	0.0909	0.1502	0.52	1.0199	1.3266	1.4168	1.5235	1.6433	1.7526	1.8098	1.8471	1.8875	1.9082	1.9325	1.9572	1.9709	1.9864	1.9893	2.0086	2.024	2.0307	2.05
Even_rep2_yehK_p11	0.0968	0.0868	0.0877	0.1109	0.1873	0.5617	1.0254	1.4947	1.6252	1.6926	1.7655	1.823	1.8791	1.9366	1.9653	1.9801	2.0034	2.0173	2.0306	2.0511	2.0577	2.0677	2.0797	2.0874	2.1035
Even_rep2_ybfQ_p11	0.1008	0.0904	0.0893	0.0946	0.1803	0.4503	1.006	1.4117	1.5785	1.6717	1.7492	1.8028	1.853	1.897	1.9349	1.9422	1.9647	1.9752	1.994	1.9999	2.0105	2.0201	2.0303	2.0424	2.0553
Even_rep2_truD_p11	0.1029	0.094	0.093	0.0965	0.1227	0.6906	1.0521	1.4149	1.5161	1.6297	1.7365	1.8206	1.8751	1.9083	1.9391	1.9623	1.9868	2.0023	2.0195	2.0361	2.0523	2.0557	2.0655	2.0789	2.0819
Even_rep2_mprA_p11	0.1115	0.1009	0.0996	0.1047	0.1601	0.5041	1.1178	1.3465	1.435	1.5166	1.6076	1.68	1.7214	1.7552	1.7872	1.8099	1.8397	1.863	1.882	1.8963	1.9105	1.9177	1.9279	1.934	1.9458
Even_rep2_ubiF_p11	0.1091	0.0987	0.0972	0.0996	0.1345	0.2918	0.4803	0.9422	1.0925	1.21	1.3114	1.393	1.4707	1.5231	1.5963	1.6583	1.6953	1.7247	1.7498	1.7828	1.799	1.8186	1.8364	1.8463	1.8604
Even_rep2_ybeX_p11	0.1042	0.0951	0.0935	0.0988	0.1562	0.5742	1.1653	1.5794	1.6735	1.7398	1.8101	1.877	1.9188	1.959	1.9869	2.0006	2.0213	2.0431	2.0476	2.0631	2.07	2.0823	2.092	2.1012	2.1154
Even_rep2_rep_p11	0.112	0.1027	0.1014	0.1034	0.1266	0.2453	0.5038	0.7193	1.2104	1.4347	1.5927	1.7067	1.7984	1.8525	1.8978	1.9236	1.9522	1.9664	1.9819	1.9965	2.0136	2.0282	2.0379	2.0488	2.0627
Even_rep2_fadD_p11	0.1126	0.1025	0.1008	0.1075	0.1833	0.3617	0.7112	1.1161	1.343	1.491	1.5883	1.6673	1.7231	1.7726	1.8288	1.8592	1.8854	1.8973	1.9143	1.9326	1.9424	1.9545	1.9719	1.9827	1.9947
Even_rep2_ydjO_p11	0.1055	0.0964	0.0953	0.1002	0.184	0.5903	1.0972	1.4533	1.5742	1.6558	1.7307	1.7989	1.8473	1.8939	1.9427	1.959	1.9786	1.994	2.0076	2.0214	2.0218	2.0352	2.0514	2.0571	2.0684
Even_rep2_yedN_p11	0.1041	0.0944	0.0926	0.0962	0.1335	0.3031	0.8381	1.3873	1.4874	1.577	1.6617	1.7156	1.7838	1.8401	1.8651	1.882	1.9068	1.9206	1.9398	1.9549	1.9639	1.98	1.9895	2.0026	2.0084
Even_rep2_yhbJ_p11	0.1018	0.0927	0.0907	0.0959	0.1329	0.9018	1.2191	1.4521	1.5694	1.6638	1.7548	1.8287	1.887	1.8993	1.9266	1.9496	1.971	1.9867	2.0082	2.026	2.0432	2.058	2.074	2.0761	2.0883
Even_rep2_BW1_p11	0.0975	0.0884	0.0878	0.0965	0.1836	0.8052	1.1446	1.4214	1.5574	1.6505	1.731	1.7847	1.8551	1.9121	1.9335	1.9539	1.9705	1.982	1.9947	2.0074	2.0221	2.0306	2.0414	2.0542	2.0649
Even_rep2_BW2_p11	0.1009	0.0915	0.0902	0.0978	0.2046	0.9043	1.1666	1.432	1.5614	1.6713	1.7355	1.7765	1.8402	1.9072	1.9489	1.9621	1.9721	1.9786	1.9943	2.008	2.0216	2.0344	2.043	2.0606	2.0648
Even_rep2_Tric-resistant_p11	0.1004	0.0904	0.0892	0.0951	0.1623	0.8712	1.2087	1.4383	1.5586	1.6424	1.7218	1.7643	1.8142	1.8631	1.9205	1.9332	1.9547	1.9728	1.9855	2.0054	2.0095	2.0226	2.0382	2.0475	2.0605
Even_rep2_yibA0.5_p12	0.1219	0.1141	0.1107	0.1092	0.1089	0.1082	0.1077	0.108	0.1076	0.1073	0.1071	0.1064	0.1068	0.107	0.1063	0.1058	0.1053	0.1051	0.1037	0.104	0.1034	0.1033	0.1027	0.1026	0.1021
Even_rep2_yjcF0.5_p12	0.145	0.1298	0.1264	0.1246	0.1234	0.123	0.1221	0.1231	0.1218	0.1215	0.1218	0.1208	0.1211	0.1215	0.1209	0.1194	0.1186	0.1188	0.1175	0.1175	0.1159	0.1162	0.1169	0.115	0.1162
Even_rep2_yjbI0.5_p12	0.1196	0.1043	0.1023	0.1148	0.0995	0.1056	0.1139	0.1104	0.1119	0.1083	0.1118	0.1118	0.1093	0.1129	0.1121	0.1119	0.1123	0.1117	0.1091	0.1069	0.1077	0.108	0.1072	0.1116	0.1115
Even_rep2_yjbL0.5_p12	0.1202	0.1045	0.1015	0.1013	0.099	0.0979	0.0975	0.0972	0.0968	0.0965	0.0963	0.0956	0.0959	0.0953	0.095	0.0949	0.0948	0.095	0.0945	0.0942	0.094	0.0933	0.0945	0.0937	0.0941
Even_rep2_yigF0.5_p12	0.1216	0.1054	0.1021	0.1005	0.0988	0.0987	0.0976	0.0975	0.0974	0.0963	0.0962	0.0959	0.0958	0.0954	0.095	0.0945	0.0944	0.0947	0.0938	0.0942	0.0942	0.0928	0.0936	0.0932	0.093
Even_rep2_acrB0.5_p12	0.1147	0.1013	0.0983	0.0971	0.0959	0.0956	0.0948	0.0942	0.0945	0.0937	0.0932	0.093	0.0933	0.0933	0.093	0.0921	0.0919	0.0923	0.0924	0.0923	0.092	0.0912	0.0914	0.0918	0.0908
Even_rep2_aroE0.5_p12	0.122	0.1076	0.105	0.1042	0.1011	0.1008	0.1003	0.1012	0.1019	0.1017	0.1008	0.1002	0.101	0.0998	0.1	0.0996	0.0996	0.1001	0.0992	0.0999	0.0992	0.0987	0.0989	0.0981	0.0992
Even_rep2_aroD0.5_p12	0.1195	0.1039	0.1009	0.0996	0.098	0.0976	0.0964	0.0967	0.096	0.0955	0.0955	0.0947	0.0951	0.0948	0.0946	0.0936	0.0937	0.0938	0.0931	0.0932	0.0933	0.0924	0.0929	0.0924	0.0928
Even_rep2_aroC0.5_p12	0.1116	0.0977	0.095	0.0935	0.0921	0.0918	0.0909	0.0906	0.0911	0.0905	0.0902	0.0897	0.0897	0.0896	0.0895	0.089	0.0886	0.0891	0.0887	0.0888	0.0885	0.088	0.0884	0.088	0.0884
Even_rep2_fre0.5_p12	0.1119	0.0987	0.0963	0.0948	0.0936	0.0932	0.0922	0.0921	0.0922	0.0916	0.0914	0.0909	0.0912	0.0908	0.0907	0.0899	0.0898	0.0904	0.0896	0.0896	0.0899	0.0898	0.0904	0.0898	0.0896
Even_rep2_sspA0.5_p12	0.1111	0.097	0.0945	0.0932	0.0917	0.0912	0.0905	0.0905	0.0898	0.0895	0.0894	0.0888	0.0891	0.0888	0.0887	0.0882	0.088	0.0883	0.0876	0.0878	0.0876	0.0872	0.0875	0.0872	0.0872
Even_rep2_minC0.5_p12	0.1096	0.0964	0.0939	0.0927	0.0916	0.0915	0.0903	0.09	0.0898	0.0893	0.0894	0.0889	0.0894	0.0892	0.0891	0.0884	0.0883	0.0884	0.0882	0.0879	0.0877	0.0874	0.0876	0.0876	0.0873
Even_rep2_gcvP0.5_p12	0.1239	0.108	0.1043	0.1021	0.1009	0.0999	0.0989	0.0993	0.0995	0.0979	0.0981	0.099	0.098	0.0975	0.0972	0.0967	0.0952	0.0947	0.0942	0.094	0.0943	0.0936	0.0935	0.0935	0.0928
Even_rep2_treC0.5_p12	0.1258	0.1128	0.1097	0.1082	0.1078	0.1058	0.1048	0.1059	0.1047	0.1042	0.1042	0.1028	0.1038	0.1032	0.1031	0.1017	0.1015	0.1017	0.1011	0.1012	0.1005	0.1004	0.1005	0.1005	0.1003
Even_rep2_galU0.5_p12	0.1567	0.1358	0.1314	0.1279	0.1275	0.1246	0.1228	0.1242	0.1225	0.1223	0.1221	0.1203	0.1205	0.1207	0.1197	0.1186	0.1168	0.1172	0.1161	0.1168	0.1156	0.1149	0.1162	0.1145	0.1147
Even_rep2_carB0.5_p12	0.1416	0.1246	0.1206	0.1183	0.1177	0.1152	0.1146	0.1161	0.1142	0.1136	0.1122	0.1117	0.1123	0.1125	0.1113	0.1102	0.1102	0.1092	0.1094	0.1087	0.1083	0.108	0.1083	0.1081	0.1078
Even_rep2_purL0.5_p12	0.1174	0.1031	0.1007	0.099	0.0984	0.0977	0.0969	0.0972	0.0976	0.0967	0.0966	0.0966	0.0965	0.0969	0.096	0.0952	0.0944	0.0949	0.0943	0.0947	0.0944	0.0938	0.094	0.0937	0.0938
Even_rep2_creA0.5_p12	0.1413	0.1257	0.1218	0.1198	0.1191	0.1184	0.1174	0.117	0.1169	0.1158	0.1155	0.1154	0.116	0.1152	0.1144	0.1136	0.1126	0.1133	0.1118	0.1132	0.1125	0.1123	0.1119	0.1116	0.1118
Even_rep2_cyaA0.5_p12	0.1398	0.1216	0.1182	0.1183	0.1162	0.1217	0.1194	0.1199	0.1161	0.1157	0.1164	0.1118	0.1197	0.1185	0.1171	0.1164	0.1161	0.1151	0.1148	0.1157	0.1139	0.1134	0.1139	0.1151	0.1151
Even_rep2_sapD0.5_p12	0.1185	0.1049	0.1027	0.1007	0.1002	0.1002	0.0995	0.099	0.0989	0.0983	0.0981	0.0976	0.0981	0.098	0.0975	0.0966	0.0962	0.0965	0.0955	0.0961	0.0957	0.0956	0.0953	0.0952	0.0948
Even_rep2_psta0.5_p12	0.1233	0.1077	0.1044	0.1023	0.1019	0.1008	0.0995	0.1001	0.0992	0.0983	0.0986	0.098	0.0978	0.0974	0.0974	0.0964	0.0954	0.0966	0.0953	0.0957	0.0964	0.0949	0.0953	0.0953	0.0952
Even_rep2_BW10.5_p12	0.1168	0.104	0.1012	0.0999	0.0996	0.0984	0.0983	0.0983	0.0982	0.0975	0.0977	0.0973	0.0975	0.0971	0.0966	0.0961	0.0957	0.096	0.0957	0.0951	0.0953	0.0949	0.0948	0.095	0.0949
Even_rep2_BW20.5_p12	0.1333	0.1201	0.118	0.1163	0.1161	0.1156	0.1137	0.1145	0.1133	0.1134	0.1132	0.1125	0.1124	0.1124	0.1115	0.1121	0.111	0.1116	0.111	0.1117	0.112	0.1111	0.1112	0.1111	0.1115
Even_rep2_Triclosan_resistant_BW0.5_p12	0.127	0.1142	0.1118	0.1104	0.1099	0.1099	0.112	0.1152	0.1204	0.1305	0.1491	0.1822	0.2519	0.3879	0.5904	0.7156	0.93	1.1024	1.2668	1.3708	1.4516	1.5292	1.6115	1.6682	1.7237
Even_rep2_yibA0.125_p12	0.1356	0.1226	0.1206	0.1193	0.1189	0.1182	0.1172	0.1173	0.1169	0.1159	0.116	0.1153	0.1155	0.1154	0.1149	0.1143	0.1145	0.1147	0.1141	0.1144	0.1141	0.1138	0.1143	0.1137	0.1135
Even_rep2_yjcF0.125_p12	0.1391	0.1222	0.1189	0.1166	0.1159	0.1148	0.1366	0.4138	0.4277	0.4839	0.5524	1.0888	1.3362	1.5311	1.6508	1.7305	1.8257	1.8709	1.9091	1.9302	1.9557	1.9741	1.9935	2.0051	2.0114
Even_rep2_yjbI0.125_p12	0.1294	0.1151	0.1133	0.1115	0.1118	0.1103	0.11	0.1149	0.3529	0.6531	0.829	0.9944	1.1958	1.4478	1.5659	1.6355	1.6947	1.7513	1.805	1.8501	1.903	1.9576	1.9858	2.0108	2.0299
Even_rep2_yjbL0.125_p12	0.1287	0.1137	0.1109	0.1095	0.1092	0.109	0.1088	0.1083	0.108	0.1084	0.1265	0.2445	0.4146	0.6078	0.7162	0.857	0.9665	1.2563	1.5892	1.6516	1.7214	1.7695	1.8376	1.9089	1.964
Even_rep2_yigF0.125_p12	0.1249	0.11	0.1066	0.1058	0.1046	0.1046	0.1038	0.1038	0.1042	0.1033	0.1039	0.1031	0.1033	0.1032	0.1028	0.1018	0.1023	0.1014	0.1008	0.1007	0.1	0.1003	0.1003	0.0995	0.0995
Even_rep2_acrB0.125_p12	0.1274	0.1147	0.112	0.111	0.1106	0.1109	0.1099	0.11	0.1093	0.1093	0.1097	0.1095	0.1098	0.1092	0.1092	0.1086	0.108	0.1084	0.1073	0.1075	0.1072	0.1068	0.1066	0.107	0.1069
Even_rep2_aroE0.125_p12	0.1255	0.1125	0.1103	0.1084	0.108	0.1078	0.1066	0.1064	0.1064	0.1066	0.1187	0.168	0.4218	0.7788	0.9495	1.1007	1.2428	1.2641	1.353	1.3566	1.3492	1.3822	1.3915	1.4509	1.5033
Even_rep2_aroD0.125_p12	0.1259	0.1159	0.1136	0.1122	0.1123	0.1109	0.11	0.1101	0.1114	0.1118	0.1192	0.1784	0.3661	0.6077	0.8737	1.1302	1.3035	1.473	1.5961	1.6633	1.7042	1.744	1.7883	1.8329	1.8647
Even_rep2_aroC0.125_p12	0.1161	0.1037	0.1012	0.1004	0.0994	0.0994	0.0985	0.0987	0.0993	0.1028	0.1301	0.228	0.3994	0.6183	0.8638	1.1172	1.2946	1.4074	1.5218	1.6071	1.6951	1.7562	1.8034	1.8477	1.8822
Even_rep2_fre0.125_p12	0.1148	0.1035	0.1007	0.1	0.0989	0.0995	0.0985	0.0986	0.0983	0.098	0.0983	0.0979	0.098	0.0977	0.0974	0.0968	0.0965	0.0966	0.0955	0.096	0.0956	0.0951	0.0952	0.0951	0.0948
Even_rep2_sspA0.125_p12	0.108	0.0957	0.0928	0.0914	0.0911	0.0904	0.0894	0.0897	0.0924	0.0979	0.1185	0.2253	0.4091	0.6634	0.9596	1.1196	1.2433	1.3859	1.4925	1.5518	1.6121	1.6842	1.7249	1.8094	1.8293
Even_rep2_minC0.125_p12	0.1189	0.1067	0.1037	0.1028	0.102	0.1008	0.102	0.1001	0.1009	0.1005	0.1156	0.2568	0.5493	0.755	1.0713	1.1685	1.2866	1.3553	1.4765	1.5714	1.6675	1.7517	1.8402	1.9088	1.9412
Even_rep2_gcvP0.125_p12	0.1441	0.1312	0.1282	0.1266	0.1261	0.1254	0.1242	0.1573	0.3079	0.5502	0.7557	0.8986	1.0673	1.2123	1.4283	1.4622	1.5048	1.5589	1.5822	1.6076	1.66	1.714	1.7672	1.8306	1.8852
Even_rep2_treC0.125_p12	0.13	0.1187	0.1169	0.1154	0.1153	0.1146	0.114	0.1135	0.1134	0.1122	0.1127	0.1121	0.1119	0.1117	0.1126	0.1383	0.2081	0.3276	0.6123	0.877	0.9949	1.0889	1.2509	1.3963	1.5248
Even_rep2_galU0.125_p12	0.1404	0.1277	0.1253	0.1239	0.1236	0.1233	0.1237	0.1219	0.1227	0.1418	0.3518	0.5896	0.8157	0.9689	1.1247	1.2743	1.5516	1.6129	1.6498	1.686	1.736	1.7962	1.8533	1.9079	1.9682
Even_rep2_carB0.125_p12	0.1419	0.1297	0.1279	0.1269	0.1262	0.1262	0.1258	0.1258	0.1275	0.1355	0.181	0.3611	0.5838	0.7273	1.0405	1.2892	1.3623	1.4037	1.5302	1.6009	1.5784	1.5764	1.6142	1.6678	1.7426
Even_rep2_purL0.125_p12	0.1351	0.1228	0.1209	0.1201	0.1204	0.1207	0.1215	0.1375	0.2541	0.469	0.751	1.0313	1.2817	1.445	1.5489	1.6187	1.6713	1.7229	1.7793	1.8245	1.8803	1.9239	1.9725	2.0093	2.0298
Even_rep2_creA0.125_p12	0.1251	0.1134	0.1123	0.1104	0.1097	0.1106	0.1101	0.1123	0.1174	0.1708	0.324	0.5523	0.8145	1.1597	1.2485	1.3541	1.4903	1.6242	1.7491	1.8323	1.9065	1.9457	1.972	2.0074	2.0223
Even_rep2_cyaA0.125_p12	0.1218	0.1084	0.1062	0.1054	0.1048	0.105	0.1041	0.1038	0.1043	0.1035	0.1039	0.103	0.104	0.1038	0.1034	0.1028	0.1018	0.1018	0.1007	0.1009	0.1001	0.0998	0.0997	0.0994	0.1004
Even_rep2_sapD0.125_p12	0.1292	0.1158	0.1138	0.1125	0.112	0.1134	0.1713	0.4314	0.6826	0.8285	1.1916	1.3557	1.4546	1.5179	1.5641	1.6087	1.6574	1.7025	1.743	1.7952	1.8305	1.853	1.8901	1.9284	1.9498
Even_rep2_psta0.125_p12	0.1213	0.109	0.1065	0.1052	0.1049	0.1043	0.1041	0.1042	0.1036	0.1034	0.1028	0.1026	0.1028	0.1032	0.1022	0.1018	0.1011	0.1011	0.1005	0.1005	0.0997	0.0997	0.0998	0.0992	0.0991
Even_rep2_BW10.125_p12	0.1074	0.0964	0.0951	0.0937	0.0928	0.0927	0.0921	0.0919	0.0919	0.0918	0.0919	0.093	0.098	0.1132	0.1684	0.304	0.5077	0.9694	1.2566	1.4399	1.5556	1.6215	1.6728	1.7242	1.7672
Even_rep2_BW20.125_p12	0.1238	0.1115	0.1097	0.107	0.1065	0.1061	0.1054	0.1055	0.1057	0.1043	0.1044	0.1038	0.1038	0.1038	0.1031	0.1027	0.1022	0.1027	0.1019	0.102	0.1019	0.1015	0.1015	0.1015	0.1012
Even_rep2_Triclosan_resistant_BW0.125_p12	0.1072	0.095	0.0926	0.092	0.0917	0.0919	0.1022	0.354	0.6855	0.9393	1.1541	1.389	1.4975	1.5664	1.6173	1.6555	1.6902	1.7273	1.7625	1.7841	1.8171	1.8373	1.8609	1.8909	1.9047
Even_rep2_yibA0.015_p12	0.164	0.1557	0.1532	0.1591	0.3156	0.9602	1.2695	1.5193	1.5615	1.6152	1.6698	1.7318	1.8367	1.8489	1.8859	1.9088	1.9263	1.944	1.9646	1.9693	1.9895	2.012	2.0192	2.0279	2.0294
Even_rep2_yjcF0.015_p12	0.1439	0.1342	0.1321	0.1396	0.3284	0.9756	1.2986	1.403	1.5156	1.597	1.6848	1.7818	1.8324	1.8713	1.9003	1.9239	1.9471	1.9751	1.9982	2.0014	2.0206	2.0334	2.0447	2.0592	2.0646
Even_rep2_yjbI0.015_p12	0.1329	0.1217	0.1205	0.128	0.3033	0.9512	1.2084	1.4567	1.5036	1.5761	1.6551	1.7317	1.8055	1.8464	1.8835	1.9167	1.9384	1.972	1.9898	2.0037	2.0219	2.0336	2.0421	2.0601	2.057
Even_rep2_yjbL0.015_p12	0.155	0.1438	0.1429	0.1474	0.226	0.8983	1.1652	1.3999	1.4803	1.5949	1.6789	1.7644	1.8166	1.8464	1.8735	1.8932	1.9111	1.9404	1.9582	1.9679	1.9851	1.9972	2.0117	2.0251	2.0256
Even_rep2_yigF0.015_p12	0.141	0.1276	0.1261	0.1363	0.4204	1.1271	1.4466	1.6123	1.6728	1.7249	1.7797	1.8366	1.8871	1.9359	1.9562	1.9767	1.9897	2.0066	2.0224	2.0271	2.0402	2.046	2.0583	2.0696	2.0739
Even_rep2_acrB0.015_p12	0.1557	0.1414	0.1406	0.1418	0.1543	0.2349	0.6515	1.1126	1.5389	1.5739	1.6431	1.7178	1.8052	1.8923	1.9355	1.9544	1.9824	2.0033	2.0317	2.0378	2.0559	2.068	2.0789	2.0942	2.0921
Even_rep2_aroE0.015_p12	0.1273	0.1149	0.1141	0.1195	0.2036	1.0215	1.24	1.3844	1.5019	1.5566	1.6254	1.6882	1.7554	1.8106	1.8447	1.8751	1.8902	1.911	1.9316	1.9368	1.9522	1.9643	1.9722	1.9842	1.988
Even_rep2_aroD0.015_p12	0.1369	0.1267	0.1278	0.1322	0.1938	0.9249	1.2098	1.3717	1.4572	1.5114	1.5739	1.6248	1.6729	1.7261	1.7647	1.806	1.8313	1.8592	1.8789	1.8886	1.9016	1.9165	1.9265	1.9414	1.9496
Even_rep2_aroC0.015_p12	0.1192	0.1075	0.107	0.1147	0.2645	1.0859	1.3076	1.4934	1.5951	1.6457	1.7011	1.7539	1.8086	1.8586	1.8985	1.9343	1.9469	1.9639	1.9823	1.9895	1.9975	2.0081	2.0245	2.0255	2.0297
Even_rep2_fre0.015_p12	0.1098	0.0972	0.0961	0.1025	0.2165	0.9524	1.2835	1.5117	1.5753	1.6125	1.6626	1.7027	1.7426	1.7701	1.806	1.8394	1.8825	1.914	1.9335	1.9431	1.9544	1.9715	1.9823	1.9926	1.9991
Even_rep2_sspA0.015_p12	0.1159	0.1042	0.1017	0.1032	0.1287	0.6317	0.9427	1.1406	1.2852	1.343	1.4427	1.5379	1.6056	1.6572	1.6955	1.7359	1.7672	1.7922	1.7986	1.8088	1.8273	1.8389	1.849	1.8616	1.8664
Even_rep2_minC0.015_p12	0.1084	0.0956	0.0942	0.1008	0.1612	0.3525	0.6912	1.3553	1.4473	1.507	1.5661	1.6416	1.7314	1.7845	1.808	1.8442	1.881	1.9059	1.923	1.9253	1.9339	1.9562	1.9537	1.9657	1.9712
Even_rep2_gcvP0.015_p12	0.1414	0.1258	0.1242	0.1391	0.3311	1.0795	1.3458	1.5081	1.5914	1.6621	1.7338	1.7981	1.8543	1.8936	1.9144	1.9348	1.9508	1.9709	1.982	1.9859	2.0005	2.0011	2.0205	2.025	2.0264
Even_rep2_treC0.015_p12	0.1535	0.1404	0.1383	0.1459	0.367	0.7947	0.9663	1.0149	1.1859	1.3945	1.6025	1.7417	1.8435	1.8925	1.8973	1.9166	1.9456	1.9665	1.9829	1.9973	2.0155	2.0168	2.0339	2.041	2.0459
Even_rep2_galU0.015_p12	0.1352	0.1226	0.12	0.1252	0.2221	0.9086	1.2158	1.4819	1.562	1.6405	1.7173	1.781	1.8539	1.8948	1.919	1.9449	1.9665	1.9913	2.0097	2.0121	2.0303	2.0403	2.0534	2.0698	2.071
Even_rep2_carB0.015_p12	0.1421	0.1282	0.1257	0.1296	0.1885	0.7587	1.1669	1.41	1.5446	1.5938	1.6522	1.6938	1.7323	1.7786	1.8166	1.8605	1.886	1.9062	1.9244	1.9312	1.9443	1.9529	1.9639	1.9812	1.9877
Even_rep2_purL0.015_p12	0.1605	0.152	0.1506	0.1564	0.2447	0.9383	1.3046	1.5206	1.5901	1.6391	1.7097	1.7711	1.8352	1.8911	1.9136	1.9396	1.959	1.9822	1.9934	2.0017	2.0158	2.0305	2.0402	2.0544	2.0547
Even_rep2_creA0.015_p12	0.1503	0.1387	0.137	0.1433	0.2608	0.7876	1.1641	1.5519	1.6256	1.6776	1.7366	1.7909	1.8479	1.9056	1.944	1.9682	1.9984	2.0212	2.0398	2.0399	2.057	2.0741	2.0799	2.0936	2.0878
Even_rep2_cyaA0.015_p12	0.156	0.1427	0.1422	0.1471	0.2539	0.9958	1.2752	1.4939	1.5802	1.6485	1.7023	1.7592	1.8134	1.8571	1.8824	1.9059	1.9267	1.9405	1.9637	1.9647	1.979	1.9951	1.9969	2.0121	2.0192
Even_rep2_sapD0.015_p12	0.1474	0.1348	0.1332	0.1372	0.2235	0.9758	1.2772	1.4715	1.588	1.6473	1.7078	1.7611	1.8245	1.865	1.915	1.938	1.9668	1.9846	1.9963	2.0013	2.0184	2.0237	2.0292	2.0454	2.0466
Even_rep2_psta0.015_p12	0.1227	0.1107	0.1094	0.1144	0.1671	0.8129	1.0971	1.4016	1.4751	1.5502	1.6277	1.7075	1.784	1.818	1.8428	1.881	1.8976	1.9099	1.9253	1.9309	1.9467	1.9628	1.9688	1.9936	1.9947
Even_rep2_BW10.015_p12	0.1126	0.1016	0.1007	0.112	0.4157	1.0117	1.2235	1.3703	1.4663	1.5386	1.6105	1.6727	1.7265	1.7814	1.829	1.8737	1.9105	1.9449	1.9659	1.9709	1.9821	1.9927	1.9959	2.0063	2.0044
Even_rep2_BW20.015_p12	0.1135	0.1007	0.1	0.112	0.424	0.9669	1.2218	1.3595	1.4469	1.525	1.5905	1.6506	1.7085	1.7596	1.8051	1.8542	1.8963	1.9191	1.9366	1.9478	1.9608	1.9707	1.9762	1.9896	1.9919
Even_rep2_Triclosan_resistant_BW0.015_p12	0.1214	0.11	0.1091	0.1165	0.3204	0.9301	1.1921	1.3144	1.4124	1.4956	1.5706	1.6256	1.6798	1.7287	1.7618	1.8119	1.8492	1.8882	1.9253	1.9368	1.9498	1.959	1.9696	1.9813	1.9885
Even_rep2_yibA_p12	0.1222	0.1104	0.1087	0.1168	0.2852	0.9087	1.2245	1.4632	1.5206	1.5867	1.6449	1.7144	1.7953	1.816	1.8434	1.8716	1.8949	1.9153	1.9296	1.9516	1.9549	1.977	1.9845	2.0017	2.004
Even_rep2_yjcF_p12	0.1143	0.1023	0.1007	0.1067	0.2354	0.8985	1.2377	1.3583	1.478	1.579	1.6872	1.7499	1.8004	1.8413	1.8641	1.8917	1.9175	1.9505	1.9628	1.9799	1.9907	2.0081	2.0228	2.0301	2.0351
Even_rep2_yjbI_p12	0.1125	0.1013	0.0999	0.1063	0.2173	0.8979	1.1711	1.4193	1.4766	1.568	1.6491	1.7391	1.7992	1.845	1.8774	1.9026	1.9227	1.9553	1.9698	1.9823	1.9977	2.0121	2.0241	2.0396	2.0409
Even_rep2_yjbL_p12	0.116	0.1051	0.1045	0.1102	0.1667	0.7713	1.1395	1.3001	1.4252	1.5328	1.6348	1.7195	1.7598	1.8018	1.8263	1.8506	1.8723	1.8949	1.9177	1.9297	1.9467	1.9615	1.9688	1.9845	1.9855
Even_rep2_yigF_p12	0.1233	0.112	0.111	0.121	0.2869	1.0692	1.375	1.542	1.6199	1.6795	1.7442	1.8017	1.8685	1.9071	1.9234	1.9481	1.9625	1.9818	1.9962	2.0024	2.0158	2.0188	2.0345	2.0445	2.0498
Even_rep2_acrB_p12	0.1106	0.0986	0.0974	0.1043	0.2113	0.9676	1.2701	1.5007	1.5618	1.6252	1.6859	1.7527	1.8202	1.8814	1.9131	1.9438	1.9607	1.9848	1.994	1.9962	2.0071	2.0113	2.024	2.0342	2.0387
Even_rep2_aroE_p12	0.1077	0.0959	0.0947	0.099	0.1707	0.9562	1.2201	1.3425	1.4568	1.531	1.6091	1.6747	1.7449	1.8107	1.8263	1.8553	1.882	1.9037	1.9255	1.9318	1.9407	1.9554	1.9596	1.9712	1.9787
Even_rep2_aroD_p12	0.1071	0.0956	0.0945	0.0989	0.1511	0.871	1.1574	1.3246	1.4108	1.4784	1.5425	1.6005	1.6617	1.7175	1.7688	1.7962	1.8227	1.8516	1.8608	1.8706	1.8845	1.8994	1.9071	1.9273	1.9357
Even_rep2_aroC_p12	0.1094	0.097	0.0957	0.1022	0.1787	0.9851	1.2389	1.4443	1.5561	1.6231	1.6816	1.7363	1.7937	1.8401	1.8856	1.9023	1.9226	1.9438	1.9555	1.9643	1.9752	1.9851	1.9942	2.0113	2.0114
Even_rep2_fre_p12	0.1076	0.0952	0.0939	0.0997	0.1876	0.9591	1.3	1.5046	1.5653	1.6202	1.6668	1.7102	1.7511	1.7935	1.8249	1.8605	1.9051	1.9429	1.9654	1.9804	1.9901	2.0029	2.0087	2.0256	2.028
Even_rep2_sspA_p12	0.1063	0.0936	0.0915	0.0922	0.1133	0.5359	0.9079	1.0702	1.1674	1.2668	1.3672	1.472	1.5419	1.6051	1.6521	1.6819	1.7067	1.7338	1.7606	1.7715	1.7841	1.803	1.8113	1.8281	1.8303
Even_rep2_minC_p12	0.1072	0.0947	0.0931	0.0956	0.1328	0.2855	0.7033	1.413	1.4924	1.5304	1.5873	1.6488	1.7333	1.7871	1.811	1.8482	1.8802	1.9028	1.9203	1.9307	1.9459	1.953	1.9618	1.9715	1.9777
Even_rep2_gcvP_p12	0.1185	0.1064	0.1047	0.1185	0.2612	1.0253	1.2877	1.4637	1.559	1.6361	1.7066	1.7682	1.831	1.8772	1.8921	1.9179	1.9378	1.9609	1.9801	1.9851	1.9946	2.0113	2.0158	2.0245	2.0273
Even_rep2_treC_p12	0.1133	0.1026	0.101	0.1073	0.1701	0.6026	0.8585	0.9065	1.0731	1.2336	1.4613	1.634	1.7286	1.7936	1.8193	1.8474	1.8675	1.8888	1.9094	1.9224	1.9397	1.9553	1.966	1.9791	1.9823
Even_rep2_galU_p12	0.1161	0.1043	0.1036	0.1069	0.1812	0.8257	1.1348	1.4063	1.5006	1.5781	1.6496	1.7215	1.7849	1.8417	1.8653	1.8963	1.9241	1.9483	1.9697	1.9772	2.0011	2.0142	2.0224	2.0355	2.0417
Even_rep2_carB_p12	0.1136	0.1023	0.0998	0.1026	0.1434	0.6912	1.1593	1.4268	1.5372	1.6009	1.6501	1.6846	1.7179	1.7602	1.7931	1.8357	1.8654	1.8852	1.9099	1.9229	1.9409	1.9479	1.9602	1.9715	1.9693
Even_rep2_purL_p12	0.1202	0.107	0.1052	0.1092	0.1716	0.8796	1.2571	1.4702	1.5645	1.6228	1.6869	1.7557	1.8117	1.8588	1.8836	1.9184	1.9453	1.9703	1.9873	1.9942	2.0136	2.0284	2.038	2.0499	2.0481
Even_rep2_creA_p12	0.1118	0.1009	0.0996	0.1039	0.1716	0.7876	1.0783	1.474	1.5738	1.6333	1.6884	1.7386	1.792	1.8425	1.8705	1.8961	1.9191	1.9462	1.9656	1.9813	1.9927	2.0087	2.0217	2.0335	2.0423
Even_rep2_cyaA_p12	0.1474	0.1082	0.1151	0.1236	0.2179	0.89	1.2581	1.4435	1.5394	1.6176	1.6852	1.7445	1.8038	1.8487	1.8757	1.9069	1.9318	1.9476	1.9734	1.9787	1.9911	2.0085	2.0177	2.0303	2.0299
Even_rep2_sapD_p12	0.1119	0.1015	0.0996	0.1026	0.1441	0.729	1.0923	1.3255	1.4586	1.5328	1.5926	1.6512	1.7067	1.7524	1.7776	1.8057	1.8363	1.8607	1.8835	1.8919	1.9087	1.923	1.9338	1.9493	1.9498
Even_rep2_psta_p12	0.1101	0.1009	0.1016	0.1031	0.1352	0.6205	0.9122	1.253	1.3171	1.3985	1.4871	1.5705	1.6647	1.7304	1.7545	1.7927	1.8319	1.855	1.875	1.8907	1.9089	1.9248	1.9395	1.9568	1.9634
Even_rep2_BW1_p12	0.1097	0.0965	0.0954	0.1046	0.2583	0.9548	1.2118	1.3484	1.4424	1.5144	1.5854	1.6436	1.6936	1.7445	1.7918	1.8438	1.89	1.9179	1.9511	1.9544	1.9639	1.9743	1.9839	1.9902	1.9959
Even_rep2_BW2_p12	0.1116	0.0988	0.0983	0.1067	0.281	0.904	1.1848	1.3301	1.4195	1.4976	1.5711	1.6292	1.6801	1.7328	1.7756	1.8295	1.8773	1.898	1.9207	1.9252	1.9415	1.9473	1.9615	1.9758	1.975
Even_rep2_Triclosan_resistant_BW_p12	0.1081	0.0959	0.0964	0.1068	0.215	0.976	1.2382	1.3742	1.4603	1.5323	1.5985	1.6548	1.6971	1.738	1.762	1.8052	1.8447	1.8842	1.92	1.9345	1.9526	1.9642	1.9669	1.9796	1.9809
Even_rep2_ptsN0.5_p13	0.223	0.1177	0.1152	0.1126	0.1119	0.1103	0.1098	0.1103	0.109	0.1082	0.1081	0.1087	0.1084	0.1089	0.1067	0.106	0.1054	0.1047	0.1049	0.1046	0.1045	0.1046	0.105	0.1049	0.1052
Even_rep2_trkA0.5_p13	0.2276	0.1085	0.1056	0.1034	0.1016	0.1017	0.1007	0.1013	0.0998	0.0995	0.0987	0.0993	0.0998	0.0978	0.0971	0.096	0.0951	0.0949	0.0946	0.0939	0.0948	0.0949	0.0948	0.0949	0.0952
Even_rep2_rsmB0.5_p13	0.2233	0.104	0.1	0.0979	0.0959	0.0959	0.0951	0.0956	0.095	0.0947	0.094	0.0944	0.0974	0.094	0.0929	0.093	0.0919	0.0921	0.0919	0.0916	0.0922	0.0919	0.0919	0.0912	0.0916
Even_rep2_tatC0.5_p13	0.2252	0.1048	0.1013	0.0984	0.0967	0.0964	0.0951	0.0956	0.0948	0.0947	0.0945	0.0944	0.0955	0.0938	0.0932	0.0926	0.0918	0.0919	0.0917	0.092	0.0924	0.0922	0.0927	0.0922	0.0917
Even_rep2_NusBinsteadofA0.5_p13	0.2333	0.0955	0.0928	0.0906	0.0895	0.089	0.0885	0.0886	0.0883	0.0878	0.0864	0.087	0.0879	0.0868	0.0864	0.086	0.0856	0.0854	0.0851	0.085	0.0852	0.085	0.0852	0.085	0.0849
Even_rep2_greA0.5_p13	0.2369	0.1036	0.1	0.0981	0.0967	0.0962	0.0953	0.0949	0.0946	0.0946	0.0938	0.094	0.0956	0.0941	0.0936	0.0931	0.0926	0.0926	0.0922	0.0925	0.0923	0.0924	0.0923	0.092	0.0919
Even_rep2_metL0.5_p13	0.2192	0.1019	0.0976	0.0953	0.0938	0.0933	0.0925	0.0929	0.092	0.092	0.0912	0.0917	0.0918	0.0918	0.0912	0.0907	0.0902	0.0903	0.0902	0.0896	0.0899	0.0895	0.0896	0.089	0.0893
Even_rep2_yhiL0.5_p13	0.2437	0.1013	0.0966	0.0955	0.0931	0.0923	0.0916	0.0916	0.0917	0.0919	0.0903	0.0909	0.0911	0.0912	0.0902	0.0899	0.0888	0.0894	0.0896	0.0892	0.0887	0.0885	0.0891	0.0879	0.0883
Even_rep2_wzzE0.5_p13	0.2383	0.1066	0.1036	0.1003	0.0994	0.1017	0.1204	0.1116	0.1061	0.1009	0.1008	0.1032	0.1132	0.1097	0.1059	0.1028	0.1005	0.0983	0.1036	0.1016	0.1007	0.1112	0.1111	0.1123	0.1122
Even_rep2_fimI0.5_p13	0.2029	0.0949	0.0922	0.0903	0.0891	0.0889	0.088	0.0879	0.0874	0.0866	0.0868	0.0871	0.0871	0.0864	0.0867	0.0869	0.0863	0.0861	0.0857	0.0854	0.0855	0.0847	0.0849	0.0847	0.0849
Even_rep2_trkH0.5_p13	0.2212	0.097	0.093	0.0914	0.0905	0.0894	0.089	0.0887	0.0884	0.0877	0.0873	0.0878	0.0879	0.0874	0.0875	0.0873	0.0867	0.0869	0.0862	0.086	0.0864	0.0853	0.086	0.0857	0.0859
Even_rep2_dgoR0.5_p13	0.1909	0.0964	0.0931	0.0917	0.091	0.09	0.0898	0.0893	0.0888	0.0884	0.0882	0.0882	0.0883	0.088	0.0879	0.0884	0.0874	0.0873	0.0868	0.0873	0.0868	0.0868	0.0868	0.0865	0.0866
Even_rep2_ybcV0.5_p13	0.2284	0.1029	0.1007	0.1002	0.0986	0.0989	0.099	0.0974	0.0973	0.0979	0.097	0.0965	0.0949	0.0932	0.0918	0.0914	0.0883	0.0865	0.0878	0.0867	0.0871	0.0866	0.0882	0.09	0.0927
Even_rep2_marR0.5_p13	0.235	0.1055	0.1043	0.1028	0.102	0.1027	0.1025	0.1015	0.1011	0.1006	0.0985	0.099	0.0976	0.0964	0.0968	0.0958	0.095	0.0952	0.0949	0.094	0.0938	0.0938	0.0938	0.0946	0.0955
Even_rep2_ypjC0.5_p13	0.2395	0.101	0.0999	0.0969	0.0972	0.0976	0.0971	0.0961	0.096	0.0952	0.0937	0.0943	0.0936	0.0927	0.0943	0.092	0.0925	0.0923	0.0918	0.0909	0.0904	0.0905	0.0907	0.0916	0.0914
Even_rep2_yabP0.5_p13	0.2303	0.1047	0.1026	0.0997	0.0993	0.099	0.0994	0.0977	0.0977	0.0967	0.0954	0.0959	0.0958	0.0944	0.096	0.094	0.0935	0.0936	0.0928	0.0931	0.0928	0.0927	0.0928	0.0929	0.0932
Even_rep2_ycjD0.5_p13	0.25	0.0973	0.0956	0.0935	0.0928	0.0925	0.0932	0.0912	0.0926	0.0905	0.0902	0.0899	0.0888	0.0885	0.0897	0.0872	0.0872	0.0877	0.0867	0.0862	0.0863	0.0868	0.0861	0.0868	0.0872
Even_rep2_ubiH0.5_p13	0.2485	0.0953	0.0932	0.0907	0.0905	0.0906	0.0905	0.0886	0.09	0.0885	0.0877	0.0874	0.0871	0.087	0.0873	0.086	0.0855	0.0863	0.0854	0.0849	0.0844	0.0846	0.0848	0.085	0.0849
Even_rep2_glpR0.5_p13	0.2395	0.1075	0.1072	0.1035	0.1046	0.1034	0.1047	0.1011	0.1047	0.1008	0.1003	0.1051	0.0995	0.0986	0.0995	0.0974	0.0977	0.0987	0.0983	0.0958	0.0966	0.0971	0.0969	0.0971	0.0974
Even_rep2_ybbC0.5_p13	0.2586	0.1067	0.1048	0.102	0.1021	0.1003	0.1012	0.0983	0.1006	0.098	0.0992	0.0975	0.097	0.0978	0.097	0.0959	0.0951	0.0967	0.0965	0.0946	0.0955	0.0944	0.0946	0.0946	0.0946
Even_rep2_gadE0.5_p13	0.2445	0.0931	0.0907	0.089	0.0888	0.0879	0.0876	0.0867	0.0873	0.0858	0.0858	0.0864	0.0858	0.0857	0.0857	0.0842	0.0842	0.0844	0.0846	0.0839	0.0838	0.0833	0.0835	0.0849	0.0833
Even_rep2_BW10.5_p13	0.1983	0.0927	0.0908	0.0884	0.0883	0.0886	0.0888	0.0869	0.0876	0.0861	0.0854	0.0874	0.0863	0.0856	0.0856	0.0842	0.0846	0.0843	0.0835	0.0837	0.0828	0.0829	0.0828	0.0835	0.0828
Even_rep2_BW20.5_p13	0.2293	0.095	0.0943	0.0913	0.0922	0.0914	0.0902	0.0889	0.0897	0.088	0.0887	0.0885	0.0882	0.0875	0.0878	0.0862	0.0861	0.0866	0.086	0.0852	0.0854	0.0851	0.0849	0.0856	0.0852
Even_rep2_Triclosan_resistant_BW0.5_p13	0.2116	0.0951	0.0928	0.0902	0.091	0.0901	0.0918	0.0919	0.0934	0.0967	0.1022	0.1174	0.1376	0.1669	0.2682	0.6243	0.8138	1.0977	1.257	1.3738	1.4569	1.5267	1.5849	1.6236	1.688
Even_rep2_ptsN0.125_p13	0.2282	0.099	0.0958	0.0946	0.096	0.1072	0.1821	0.4083	0.6751	0.9871	1.1533	1.3461	1.4431	1.5266	1.6016	1.6554	1.7297	1.7977	1.847	1.8943	1.9283	1.9444	1.9657	1.9761	1.9855
Even_rep2_trkA0.125_p13	0.277	0.1214	0.1174	0.1149	0.1131	0.1208	0.192	0.603	0.9659	1.1704	1.3812	1.5742	1.6632	1.7209	1.7683	1.8011	1.8517	1.8913	1.9326	1.9709	2.0131	2.0374	2.0522	2.0618	2.0717
Even_rep2_rsmB0.125_p13	0.2215	0.098	0.0957	0.0933	0.0927	0.0935	0.1002	0.1454	0.3165	0.598	0.9186	1.1412	1.4162	1.5147	1.5769	1.6362	1.7157	1.7915	1.8593	1.9226	1.9563	1.9771	2.0044	2.0173	2.0264
Even_rep2_tatC0.125_p13	0.2423	0.1128	0.11	0.1078	0.1075	0.1061	0.106	0.1079	0.1077	0.1088	0.1102	0.1124	0.1331	0.1832	0.2917	0.4573	0.6257	0.8183	1.0564	1.3381	1.5538	1.7403	1.7985	1.8527	1.8907
Even_rep2_NusBinsteadofA0.125_p13	0.2625	0.0989	0.0956	0.0936	0.0929	0.0923	0.0923	0.092	0.0917	0.0913	0.0915	0.0922	0.0927	0.0948	0.1085	0.1318	0.1723	0.2395	0.3329	0.4556	0.5	0.6415	0.9992	1.0696	1.1555
Even_rep2_greA0.125_p13	0.2659	0.1017	0.1005	0.0984	0.0968	0.0968	0.097	0.1053	0.3927	0.732	0.9708	1.2352	1.4381	1.5125	1.5874	1.6421	1.7074	1.7836	1.8161	1.8434	1.8776	1.9002	1.9194	1.943	1.9498
Even_rep2_metL0.125_p13	0.2432	0.1163	0.1137	0.1112	0.1108	0.1102	0.11	0.1089	0.1086	0.1068	0.1081	0.1084	0.158	0.4673	0.6122	0.8449	1.1512	1.44	1.5421	1.6122	1.6721	1.7568	1.8103	1.8784	1.9415
Even_rep2_yhiL0.125_p13	0.2512	0.1037	0.102	0.0993	0.122	0.1153	0.1021	0.1123	0.1039	0.1001	0.1177	0.3435	0.2998	0.5037	0.8076	1.1708	1.3381	1.4748	1.595	1.7104	1.8109	1.9254	1.9346	1.9857	2.009
Even_rep2_wzzE0.125_p13	0.2431	0.106	0.105	0.1033	0.1015	0.0998	0.0993	0.0986	0.0984	0.0985	0.0988	0.1399	0.2616	0.4481	0.7267	1.1071	1.1821	1.3212	1.3763	1.5216	1.5928	1.6661	1.7066	1.7566	1.8064
Even_rep2_fimI0.125_p13	0.202	0.0942	0.0927	0.09	0.0891	0.0885	0.0881	0.0881	0.0878	0.0872	0.0872	0.0873	0.0866	0.0858	0.0861	0.0861	0.0851	0.0853	0.0851	0.0851	0.0847	0.0847	0.085	0.0848	0.0849
Even_rep2_trkH0.125_p13	0.2451	0.1004	0.0978	0.0959	0.0946	0.0951	0.0946	0.0964	0.1114	0.2802	0.5997	0.8523	1.0502	1.1891	1.4133	1.4654	1.5614	1.6305	1.6929	1.7437	1.7992	1.8606	1.92	2.0041	2.0007
Even_rep2_dgoR0.125_p13	0.2181	0.0996	0.0926	0.091	0.0941	0.0998	0.093	0.0897	0.0942	0.099	0.0924	0.0874	0.0934	0.0985	0.0869	0.0862	0.0845	0.0847	0.0851	0.0862	0.0844	0.0847	0.0843	0.084	0.0846
Even_rep2_ybcV0.125_p13	0.2135	0.0994	0.0967	0.0946	0.0935	0.0925	0.0919	0.0936	0.1393	0.3815	0.7411	1.0347	1.2299	1.5487	1.6345	1.665	1.7132	1.7462	1.7948	1.8574	1.9019	1.9456	1.949	1.9877	1.9964
Even_rep2_marR0.125_p13	0.2404	0.1057	0.1028	0.1006	0.0999	0.0988	0.0985	0.0982	0.0976	0.0977	0.0983	0.1017	0.0996	0.0962	0.0951	0.0945	0.0939	0.0945	0.0963	0.0972	0.0964	0.0931	0.0931	0.0928	0.0934
Even_rep2_ypjC0.125_p13	0.2395	0.098	0.096	0.0942	0.0937	0.0927	0.0932	0.0984	0.1544	0.3204	0.622	1.0656	1.2861	1.4924	1.6017	1.6378	1.7094	1.7754	1.8568	1.9191	1.9856	1.9881	2.0104	2.0244	2.0379
Even_rep2_yabP0.125_p13	0.228	0.0991	0.0974	0.0953	0.0952	0.0943	0.096	0.1094	0.181	0.4542	0.6567	0.84	1.03	1.3326	1.5006	1.5931	1.7057	1.8006	1.8855	1.9597	1.9855	1.999	2.01	2.0184	2.0375
Even_rep2_ycjD0.125_p13	0.2619	0.1009	0.0991	0.0968	0.0962	0.0953	0.096	0.1023	0.147	0.435	0.6775	1.0441	1.3176	1.4786	1.601	1.6338	1.6843	1.7357	1.7724	1.8197	1.8638	1.9098	1.9305	1.9533	1.9863
Even_rep2_ubiH0.125_p13	0.2618	0.0998	0.0983	0.0964	0.0962	0.0984	0.114	0.261	0.6253	0.9739	1.2863	1.529	1.6381	1.6978	1.7645	1.8358	1.9177	1.9794	2.0032	2.0263	2.0474	2.0667	2.0788	2.0859	2.0952
Even_rep2_glpR0.125_p13	0.236	0.1036	0.1015	0.0993	0.0987	0.0982	0.105	0.1878	0.4605	0.6301	1.021	1.2783	1.4313	1.5287	1.5956	1.6528	1.7136	1.7577	1.8049	1.8444	1.8759	1.9097	1.9483	1.9774	1.9904
Even_rep2_ybbC0.125_p13	0.2541	0.132	0.1033	0.1011	0.1003	0.0996	0.1003	0.1213	0.2972	0.6019	0.8488	1.1172	1.4065	1.5375	1.6006	1.6469	1.7002	1.7475	1.7973	1.8487	1.9024	1.9488	1.9908	2.0062	2.0222
Even_rep2_gadE0.125_p13	0.2391	0.1048	0.1021	0.0999	0.0993	0.0987	0.0977	0.098	0.0968	0.0975	0.0964	0.0961	0.0963	0.0956	0.0949	0.0942	0.0935	0.0931	0.093	0.0925	0.093	0.093	0.0926	0.0929	0.0929
Even_rep2_BW10.125_p13	0.2217	0.101	0.0989	0.0967	0.0959	0.0958	0.0952	0.1093	0.0951	0.0947	0.0938	0.0945	0.0941	0.0936	0.0986	0.093	0.0921	0.092	0.0914	0.0915	0.0913	0.0911	0.0916	0.0907	0.0909
Even_rep2_BW20.125_p13	0.2228	0.0963	0.0937	0.0918	0.0908	0.0901	0.089	0.0975	0.1137	0.1584	0.2749	0.5593	0.7727	0.9763	1.0643	1.1568	1.3673	1.5094	1.586	1.6497	1.7193	1.7689	1.8068	1.8388	1.8759
Even_rep2_Triclosan_resistant_BW0.125_p13	0.1941	0.1024	0.0994	0.097	0.0959	0.0958	0.1006	0.2121	0.7741	1.1393	1.3633	1.4839	1.5448	1.62	1.681	1.7157	1.758	1.7943	1.8215	1.8488	1.8694	1.9026	1.9144	1.9272	1.948
Even_rep2_ptsN0.015_p13	0.2056	0.099	0.097	0.1016	0.1575	0.488	1.1356	1.4206	1.564	1.6307	1.6888	1.748	1.802	1.8505	1.9155	1.9464	1.9538	1.9828	1.9866	1.9933	2.0052	2.0202	2.0269	2.0335	2.0384
Even_rep2_trkA0.015_p13	0.2182	0.098	0.0962	0.0984	0.1254	0.2376	0.7671	1.3003	1.3543	1.4665	1.5626	1.6606	1.7497	1.7911	1.8445	1.8542	1.8809	1.9106	1.9347	1.95	1.9675	1.9742	1.9916	2.0033	2.0106
Even_rep2_rsmB0.015_p13	0.2057	0.1013	0.0996	0.1038	0.1544	0.8311	1.0988	1.3811	1.4346	1.5466	1.6616	1.7602	1.8438	1.8826	1.9149	1.936	1.968	1.9914	2.0111	2.0211	2.0395	2.0427	2.0581	2.0693	2.0749
Even_rep2_tatC0.015_p13	0.2599	0.1103	0.1137	0.1197	0.1378	0.2063	0.3709	0.6281	1.1393	1.3168	1.4755	1.5966	1.7676	1.7871	1.8458	1.8876	1.9168	1.9484	1.963	1.9743	2.0031	2.0063	2.0237	2.0241	2.039
Even_rep2_NusBinsteadofA0.015_p13	0.2509	0.102	0.1005	0.1003	0.1105	0.3849	1.0111	1.2697	1.5196	1.5826	1.6546	1.7307	1.7905	1.8359	1.9016	1.9191	1.9471	1.9665	1.9861	1.9959	2.0138	2.0318	2.0448	2.0535	2.0638
Even_rep2_greA0.015_p13	0.2593	0.1034	0.1022	0.1065	0.1381	0.7784	1.1219	1.386	1.5045	1.5759	1.6348	1.6973	1.7587	1.7991	1.8407	1.8515	1.8756	1.8887	1.9047	1.9156	1.9337	1.9456	1.9535	1.9646	1.9716
Even_rep2_metL0.015_p13	0.2148	0.0988	0.0978	0.1005	0.1176	0.1932	0.2869	0.6765	1.2012	1.3452	1.4405	1.5494	1.6097	1.6455	1.6974	1.7222	1.7531	1.7831	1.8019	1.8229	1.8376	1.8524	1.8606	1.8738	1.8875
Even_rep2_yhiL0.015_p13	0.2227	0.142	0.0985	0.1015	0.157	0.4442	1.121	1.5367	1.4988	1.5549	1.6378	1.705	1.7682	1.8451	1.8831	1.8769	1.9024	1.9263	1.9439	1.9684	1.9893	1.9998	2.003	2.0179	2.0263
Even_rep2_wzzE0.015_p13	0.2185	0.0997	0.0988	0.1029	0.1761	0.9671	1.2533	1.478	1.5766	1.6629	1.7367	1.8166	1.875	1.9392	1.9752	1.9846	2.0044	2.0312	2.0361	2.0585	2.0675	2.0699	2.0833	2.0876	2.102
Even_rep2_fimI0.015_p13	0.1987	0.0954	0.0941	0.0978	0.1892	0.854	1.1385	1.425	1.5249	1.6267	1.702	1.7883	1.8507	1.9167	1.9589	1.9762	1.9987	2.0159	2.0114	2.0218	2.0386	2.0504	2.0572	2.0569	2.0844
Even_rep2_trkH0.015_p13	0.2258	0.0955	0.0938	0.098	0.1725	0.9049	1.291	1.5095	1.6112	1.6826	1.7483	1.8298	1.8852	1.9365	1.9898	1.997	2.0229	2.0382	2.0489	2.0586	2.0669	2.0737	2.0786	2.0789	2.0844
Even_rep2_dgoR0.015_p13	0.1789	0.0927	0.0903	0.0923	0.1323	0.8502	1.2295	1.4838	1.5592	1.6313	1.7042	1.7847	1.8477	1.9106	1.9615	1.9709	1.9916	2.0144	2.0207	2.0462	2.062	2.0661	2.0745	2.076	2.082
Even_rep2_ybcV0.015_p13	0.2069	0.1062	0.1044	0.1103	0.1658	0.7136	1.1909	1.5274	1.5811	1.6429	1.7084	1.7763	1.8525	1.8823	1.9132	1.9324	1.9554	1.9814	1.9917	2.0081	2.0224	2.0285	2.041	2.0525	2.0518
Even_rep2_marR0.015_p13	0.2125	0.112	0.1097	0.1181	0.2048	0.8329	1.23	1.5093	1.5768	1.6449	1.7081	1.7919	1.8561	1.8732	1.9116	1.9156	1.9475	1.9623	1.9797	1.9965	2.0122	2.0184	2.0339	2.0392	2.0433
Even_rep2_ypjC0.015_p13	0.2231	0.111	0.1096	0.1125	0.1821	0.8349	1.1767	1.4755	1.5203	1.6056	1.6914	1.7798	1.848	1.902	1.9399	1.9618	1.9907	2.016	2.0242	2.0391	2.0522	2.0637	2.0746	2.0811	2.0854
Even_rep2_yabP0.015_p13	0.2345	0.1195	0.1181	0.1215	0.1985	0.6518	1.248	1.495	1.5748	1.6481	1.7357	1.8244	1.892	1.9327	1.9512	1.9629	1.9857	2.008	2.0146	2.0277	2.0447	2.0462	2.0674	2.0651	2.0712
Even_rep2_ycjD0.015_p13	0.2741	0.1174	0.1157	0.1183	0.1619	0.6479	1.085	1.3125	1.4235	1.4906	1.5622	1.6344	1.6944	1.7423	1.7872	1.8096	1.8388	1.864	1.8788	1.8942	1.9138	1.9294	1.9414	1.9512	1.9599
Even_rep2_ubiH0.015_p13	0.2789	0.1216	0.1204	0.1235	0.1725	0.8104	1.214	1.4903	1.5911	1.6592	1.7494	1.8379	1.9036	1.9583	1.9864	2.0137	2.0402	2.0671	2.0764	2.0941	2.1115	2.1239	2.1276	2.1345	2.1374
Even_rep2_glpR0.015_p13	0.2362	0.1141	0.1124	0.1161	0.1855	0.6646	1.1136	1.4807	1.5436	1.6141	1.6919	1.7784	1.8544	1.8999	1.9428	1.9608	1.9857	2.0029	2.0124	2.0178	2.0314	2.0313	2.0489	2.0571	2.0514
Even_rep2_ybbC0.015_p13	0.2527	0.1116	0.1098	0.1145	0.1836	0.5955	1.1185	1.4883	1.6282	1.6749	1.7356	1.8054	1.8643	1.9173	1.9397	1.9458	1.9707	1.9899	2.0056	2.0207	2.0378	2.0407	2.0501	2.054	2.0597
Even_rep2_gadE0.015_p13	0.2347	0.1061	0.1038	0.1046	0.1286	0.2928	0.9657	1.3223	1.3931	1.487	1.574	1.6704	1.7123	1.7463	1.7781	1.8032	1.833	1.8578	1.8744	1.8967	1.9153	1.9275	1.9411	1.9502	1.9595
Even_rep2_BW10.015_p13	0.2044	0.1004	0.0989	0.1033	0.1889	0.5922	0.8887	1.1565	1.3252	1.4374	1.5309	1.623	1.6943	1.7565	1.8196	1.8618	1.9165	1.946	1.9551	1.9715	1.9892	1.9932	2.0049	2.0136	2.02
Even_rep2_BW20.015_p13	0.2208	0.1039	0.1022	0.1057	0.1635	0.545	0.8676	1.1285	1.2787	1.4022	1.5014	1.6013	1.6761	1.7356	1.7984	1.8383	1.8887	1.9433	1.9598	1.9728	1.9935	1.9993	2.0061	2.0146	2.0182
Even_rep2_Triclosan_resistant_BW0.015_p13	0.1971	0.1016	0.0993	0.1001	0.1168	0.586	0.9861	1.2452	1.3736	1.4653	1.5258	1.6266	1.6789	1.7282	1.7798	1.8091	1.8408	1.8804	1.9087	1.9379	1.9705	1.9888	2.0121	2.0259	2.0303
Even_rep2_ptsN_p13	0.1506	0.0951	0.0925	0.0959	0.1613	0.5657	1.1515	1.4409	1.5757	1.6486	1.7088	1.7695	1.8143	1.865	1.9177	1.9537	1.9715	1.9941	2.0052	2.0091	2.0279	2.0344	2.0432	2.0555	2.057
Even_rep2_trkA_p13	0.1942	0.0942	0.0923	0.0941	0.1193	0.2397	0.5893	0.9594	1.1601	1.3364	1.4941	1.6051	1.6962	1.7505	1.7959	1.8193	1.8504	1.878	1.8959	1.9054	1.9298	1.9421	1.9629	1.9701	1.9748
Even_rep2_rsmB_p13	0.2042	0.097	0.0944	0.0975	0.1335	0.7283	1.0827	1.3331	1.3954	1.5178	1.6306	1.7258	1.803	1.8604	1.8962	1.9284	1.9574	1.9924	2.0095	2.0199	2.0468	2.0509	2.0613	2.0734	2.0793
Even_rep2_tatC_p13	0.2116	0.0994	0.0966	0.096	0.109	0.1729	0.3091	0.4833	0.8771	1.2213	1.352	1.5006	1.6488	1.6933	1.7329	1.7688	1.7877	1.8164	1.839	1.8515	1.8783	1.8946	1.9049	1.9225	1.9286
Even_rep2_NusBinsteadofA_p13	0.2464	0.1023	0.1002	0.0989	0.1041	0.1695	0.9315	1.2077	1.4656	1.5282	1.5973	1.682	1.7449	1.8132	1.8358	1.8623	1.8878	1.9098	1.9264	1.9439	1.961	1.9765	1.9882	1.9986	2.0082
Even_rep2_greA_p13	0.2384	0.0981	0.0962	0.0993	0.1412	0.3988	1.0499	1.3332	1.4549	1.5244	1.5953	1.6613	1.7227	1.7729	1.8179	1.8322	1.8653	1.8924	1.9086	1.9149	1.9327	1.9463	1.9507	1.9613	1.9689
Even_rep2_metL_p13	0.2158	0.1041	0.1012	0.1009	0.1128	0.1843	0.2863	0.7554	1.0943	1.2965	1.4458	1.5818	1.6949	1.7594	1.8074	1.8236	1.8508	1.8737	1.8867	1.8936	1.9067	1.9146	1.9283	1.9297	1.9305
Even_rep2_yhiL_p13	0.2094	0.0933	0.0917	0.0929	0.1377	0.3505	1.0361	1.5395	1.5177	1.57	1.6326	1.7067	1.7667	1.8164	1.8488	1.871	1.8936	1.913	1.9278	1.9366	1.9545	1.9676	1.9725	1.9814	1.9981
Even_rep2_wzzE_p13	0.2148	0.1023	0.1004	0.1049	0.1725	0.8105	1.2309	1.4683	1.5555	1.6462	1.7121	1.8084	1.8723	1.9265	1.9533	1.9701	2.0035	2.0126	2.0265	2.03	2.0418	2.0548	2.0573	2.0699	2.0721
Even_rep2_fimI_p13	0.183	0.0987	0.0966	0.0994	0.1567	0.8004	1.2127	1.4464	1.5438	1.637	1.7124	1.7967	1.8632	1.9244	1.9681	1.9857	2.0054	2.0233	2.03	2.0352	2.0496	2.0646	2.0635	2.0702	2.0652
Even_rep2_trkH_p13	0.201	0.0983	0.0966	0.1011	0.1646	0.8362	1.2886	1.4918	1.5996	1.6638	1.7259	1.8027	1.8607	1.9154	1.9601	1.983	2.0111	2.0233	2.0359	2.0422	2.0552	2.0574	2.0626	2.072	2.0797
Even_rep2_dgoR_p13	0.1664	0.0976	0.0952	0.0967	0.1577	0.8054	1.2378	1.4699	1.5593	1.6354	1.7008	1.7803	1.8426	1.895	1.9274	1.9423	1.9572	1.9751	1.9911	2.003	2.0188	2.0301	2.0375	2.0482	2.0493
Even_rep2_ybcV_p13	0.1194	0.0967	0.0942	0.0978	0.1455	0.807	1.2013	1.492	1.5309	1.6024	1.6849	1.7538	1.8109	1.8676	1.9019	1.9204	1.9521	1.975	1.9855	1.9958	2.0202	2.0255	2.0345	2.0437	2.0507
Even_rep2_marR_p13	0.168	0.0965	0.0943	0.0974	0.1438	0.7409	1.1922	1.4991	1.5359	1.5979	1.6598	1.7271	1.8015	1.8495	1.8794	1.894	1.9222	1.9406	1.9486	1.9689	1.9828	1.992	2.0068	2.0083	2.0171
Even_rep2_ypjC_p13	0.1762	0.0962	0.0937	0.0952	0.1394	0.7621	1.1368	1.3753	1.443	1.5405	1.6489	1.734	1.8121	1.8769	1.9209	1.9446	1.9777	1.9966	2.0148	2.0282	2.0417	2.0516	2.0634	2.0684	2.0714
Even_rep2_yabP_p13	0.1822	0.0962	0.0935	0.0963	0.1426	0.7291	1.2138	1.4687	1.5687	1.6555	1.7385	1.823	1.8813	1.9355	1.9672	1.9878	2.0117	2.028	2.0399	2.0441	2.0667	2.0701	2.0811	2.0829	2.0932
Even_rep2_ycjD_p13	0.2005	0.1062	0.1037	0.1081	0.1327	0.3508	1.105	1.3611	1.4218	1.4814	1.5555	1.6277	1.6865	1.7487	1.7922	1.8193	1.8473	1.8758	1.8955	1.9068	1.9378	1.9527	1.9612	1.9731	1.9757
Even_rep2_ubiH_p13	0.1985	0.1001	0.0977	0.0992	0.1205	0.6268	1.1252	1.4575	1.5131	1.5995	1.6918	1.7699	1.8359	1.9011	1.9424	1.9682	1.9951	2.0222	2.0404	2.0481	2.0713	2.0835	2.0959	2.1061	2.1097
Even_rep2_glpR_p13	0.1772	0.1083	0.1054	0.1069	0.1309	0.5097	1.0249	1.5264	1.5958	1.6588	1.7188	1.7912	1.8511	1.9124	1.9518	1.9727	1.9841	2.0108	2.0241	2.0432	2.0667	2.0716	2.0832	2.0895	2.0881
Even_rep2_ybbC_p13	0.1744	0.1002	0.0973	0.0987	0.1229	0.3257	1.0073	1.3917	1.537	1.6087	1.6707	1.7338	1.7819	1.8342	1.8569	1.8773	1.8911	1.9062	1.915	1.9298	1.9394	1.9501	1.9545	1.9667	1.9699
Even_rep2_gadE_p13	0.1596	0.0982	0.0954	0.0964	0.1097	0.1955	0.7655	1.2387	1.3473	1.4336	1.5076	1.5908	1.6764	1.7331	1.7803	1.7903	1.8149	1.8396	1.8547	1.864	1.8897	1.9006	1.9176	1.9292	1.9371
Even_rep2_BW1_p13	0.1674	0.1033	0.1009	0.1053	0.1563	0.5467	0.9997	1.2901	1.4351	1.5161	1.5883	1.6605	1.7136	1.7563	1.8131	1.8622	1.9074	1.936	1.9557	1.9657	1.9882	1.9961	2.008	2.0176	2.0154
Even_rep2_BW2_p13	0.1492	0.0972	0.095	0.0975	0.142	0.4421	0.8994	1.1749	1.3289	1.4261	1.5029	1.5887	1.6632	1.7131	1.7782	1.835	1.9049	1.9581	2.0192	2.0653	2.1087	2.1458	2.1623	2.1824	2.1947
Even_rep2_Triclosan_resistant_BW_p13	0.1069	0.0959	0.0936	0.0937	0.1087	0.5711	1.0957	1.3212	1.4325	1.5146	1.5715	1.6491	1.6985	1.7429	1.7863	1.8184	1.8582	1.9067	1.938	1.9666	1.9975	2.0107	2.021	2.0252	2.0297
Even_rep2_ompX0.5_p14	0.1142	0.0977	0.0942	0.0924	0.0931	0.0927	0.091	0.0901	0.0902	0.0884	0.0895	0.0893	0.0881	0.0878	0.0881	0.0873	0.087	0.0872	0.0863	0.0881	0.0867	0.0871	0.0867	0.0861	0.086
Even_rep2_purH0.5_p14	0.1038	0.0906	0.0885	0.0868	0.0866	0.086	0.0843	0.0841	0.0836	0.0835	0.0837	0.083	0.0829	0.0822	0.0825	0.0821	0.0821	0.0819	0.0816	0.082	0.0813	0.082	0.0813	0.0812	0.081
Even_rep2_acrR0.5_p14	0.1068	0.0924	0.0897	0.0882	0.0877	0.0871	0.086	0.0857	0.0856	0.085	0.0848	0.0841	0.0837	0.0839	0.084	0.0836	0.0837	0.0832	0.0829	0.0834	0.0826	0.0834	0.0824	0.0823	0.0824
Even_rep2_kgtP0.5_p14	0.1031	0.0919	0.0893	0.0875	0.0871	0.0869	0.0859	0.0857	0.0859	0.0848	0.0852	0.0843	0.0842	0.0834	0.0841	0.0841	0.0838	0.0835	0.0828	0.0835	0.0831	0.083	0.0831	0.0829	0.0829
Even_rep2_napD0.5_p14	0.1057	0.0991	0.0953	0.0934	0.0929	0.0918	0.092	0.0918	0.0911	0.0909	0.0891	0.0899	0.0918	0.0939	0.0938	0.0944	0.0941	0.0946	0.0948	0.0952	0.0941	0.0953	0.0949	0.0938	0.094
Even_rep2_pcnB0.5_p14	0.1089	0.0979	0.0951	0.0936	0.0933	0.0916	0.0917	0.0915	0.0912	0.0911	0.0893	0.0898	0.0901	0.092	0.0921	0.0926	0.0919	0.0928	0.0927	0.0927	0.0923	0.0926	0.0925	0.0921	0.0917
Even_rep2_aroK0.5_p14	0.1133	0.0999	0.097	0.095	0.0945	0.094	0.093	0.0921	0.0925	0.0921	0.0915	0.0913	0.0919	0.0918	0.0905	0.092	0.0916	0.0915	0.0917	0.0913	0.0907	0.0909	0.0903	0.0912	0.0907
Even_rep2_ynfD0.5_p14	0.1349	0.1229	0.1202	0.1185	0.1177	0.1164	0.1161	0.1154	0.1153	0.1155	0.1146	0.1148	0.1145	0.1154	0.1144	0.115	0.1146	0.1157	0.1149	0.1145	0.1138	0.1141	0.1142	0.1147	0.1146
OddandEven_rep2_SL13540.5_p14	0.1365	0.1277	0.1262	0.1215	0.1214	0.1217	0.1203	0.1196	0.1206	0.1197	0.1199	0.1195	0.1186	0.1178	0.116	0.1187	0.1169	0.1175	0.1194	0.1185	0.1168	0.1163	0.1172	0.1174	0.1183
OddandEven_rep2_SL7020.5_p14	0.1216	0.1077	0.1058	0.1041	0.1097	0.1742	0.8118	1.0061	1.2005	1.3144	1.3762	1.4614	1.5891	1.7234	1.8384	1.8831	1.9048	1.9379	1.9508	1.9767	1.9833	1.9902	1.9944	1.9952	2.0057
OddandEven_rep2_BW10.5_p14	0.1204	0.1071	0.106	0.1026	0.1018	0.1012	0.1005	0.0997	0.1008	0.0996	0.0998	0.0996	0.0998	0.0995	0.0993	0.1005	0.0996	0.1009	0.1004	0.1006	0.0999	0.1	0.0998	0.0998	0.1001
OddandEven_rep2_BW20.5_p14	0.1086	0.097	0.0966	0.0918	0.0911	0.0915	0.0902	0.0892	0.0901	0.0891	0.0898	0.0901	0.0886	0.0883	0.0869	0.0879	0.0872	0.0876	0.0888	0.0887	0.0866	0.0867	0.0876	0.0859	0.0876
OddandEven_rep2_BW30.5_p14	0.1112	0.0982	0.0969	0.0934	0.0948	0.0946	0.0966	0.1038	0.1161	0.1426	0.1869	0.2724	0.5817	0.7843	0.9413	1.0131	1.0996	1.2803	1.4165	1.504	1.5652	1.62	1.673	1.7166	1.766
OddandEven_rep2_BW10.5_p14	0.1154	0.1044	0.1006	0.0987	0.0979	0.0967	0.0962	0.0958	0.0962	0.0953	0.0952	0.096	0.0954	0.096	0.0942	0.0946	0.0942	0.0952	0.0943	0.0935	0.0937	0.0929	0.0948	0.0933	0.0931
OddandEven_rep2_BW20.5_p14	0.1065	0.0944	0.0921	0.0914	0.0898	0.0894	0.0891	0.0887	0.0875	0.0876	0.0869	0.0874	0.0868	0.0865	0.0865	0.0868	0.0859	0.086	0.0855	0.085	0.0853	0.0852	0.0852	0.0849	0.0851
OddandEven_rep2_Triclosan_resistant_BW0.5_p14	0.1054	0.0928	0.0912	0.0893	0.0895	0.0907	0.0907	0.0936	0.1029	0.1144	0.1305	0.1666	0.2087	0.3076	0.5838	0.8161	0.9737	1.2388	1.356	1.4295	1.4975	1.5473	1.5973	1.6622	1.6987
Even_rep2_ompX0.125_p14	0.1378	0.1198	0.1173	0.1174	0.1141	0.1136	0.1144	0.113	0.1129	0.1127	0.1173	0.1326	0.1687	0.301	0.4626	0.6801	0.8335	1.053	1.2817	1.4708	1.5717	1.6526	1.7112	1.7583	1.7943
Even_rep2_purH0.125_p14	0.1139	0.0997	0.0995	0.0973	0.0957	0.0942	0.095	0.0938	0.0956	0.0946	0.095	0.0954	0.098	0.1165	0.2178	0.3838	0.5684	0.714	1.1574	1.3555	1.47	1.5558	1.6231	1.6766	1.7171
Even_rep2_acrR0.125_p14	0.1467	0.128	0.1265	0.1237	0.1242	0.1225	0.1215	0.1205	0.1212	0.1205	0.1204	0.1196	0.1192	0.1185	0.1181	0.118	0.1185	0.119	0.1197	0.1224	0.1448	0.7317	1.0154	1.1556	1.3627
Even_rep2_kgtP0.125_p14	0.1068	0.0946	0.0923	0.0914	0.0897	0.0895	0.087	0.0879	0.0867	0.0864	0.0858	0.0858	0.086	0.0853	0.0849	0.0852	0.0858	0.0861	0.0856	0.0841	0.0845	0.0852	0.0849	0.0842	0.0845
Even_rep2_napD0.125_p14	0.1155	0.1017	0.0992	0.0977	0.0969	0.0963	0.0954	0.0949	0.0955	0.1217	0.3162	0.7779	1.0074	1.2463	1.5132	1.5794	1.6713	1.7839	1.8649	1.9587	1.99	2.0178	2.0426	2.0623	2.084
Even_rep2_pcnB0.125_p14	0.1255	0.1126	0.1098	0.1081	0.1071	0.1064	0.1052	0.1054	0.1052	0.1043	0.1038	0.1038	0.1043	0.1041	0.1032	0.1041	0.1224	0.1981	0.4183	0.9511	1.1615	1.3396	1.509	1.5708	1.6639
Even_rep2_aroK0.125_p14	0.1172	0.1056	0.1034	0.1021	0.1018	0.1027	0.1122	0.2109	0.4481	0.856	1.1185	1.3011	1.489	1.5628	1.5887	1.6246	1.686	1.741	1.8168	1.8895	1.9441	1.9638	1.9848	1.9944	2.0111
Even_rep2_ynfD0.125_p14	0.1332	0.1205	0.1172	0.1148	0.1134	0.1133	0.1121	0.1117	0.1116	0.1104	0.1111	0.114	0.1585	0.2873	0.4591	0.6736	1.0342	1.2044	1.3936	1.5445	1.6486	1.715	1.7647	1.8037	1.8388
OddandEven_rep2_SL13540.125_p14	0.1131	0.1039	0.102	0.101	0.1003	0.1005	0.1015	0.1059	0.1304	0.2903	0.5084	0.754	0.9582	1.0155	1.0594	1.1316	1.2038	1.2671	1.3093	1.3581	1.4066	1.4624	1.5123	1.5708	1.6246
OddandEven_rep2_SL7020.125_p14	0.1179	0.1068	0.1049	0.1045	0.1076	0.1602	0.8251	0.9546	1.2031	1.298	1.3777	1.5005	1.6187	1.7399	1.8785	1.9013	1.9239	1.9449	1.9705	1.9943	2.023	2.0174	2.0301	2.0427	2.0354
OddandEven_rep2_BW10.125_p14	0.1106	0.1009	0.0981	0.0968	0.0956	0.0954	0.0953	0.0947	0.0944	0.0944	0.0946	0.0939	0.0953	0.0953	0.0955	0.0953	0.0956	0.0951	0.0957	0.095	0.0944	0.0955	0.0948	0.0949	0.0948
OddandEven_rep2_BW20.125_p14	0.1509	0.1278	0.1051	0.1042	0.1126	0.1017	0.101	0.0998	0.1066	0.1096	0.1146	0.1105	0.1037	0.1034	0.1027	0.104	0.1025	0.1045	0.1051	0.1025	0.0999	0.1009	0.1011	0.1006	0.0994
OddandEven_rep2_BW30.125_p14	0.1206	0.1092	0.1068	0.1049	0.1058	0.1115	0.3401	0.7273	1.0077	1.2811	1.4953	1.6021	1.6766	1.7287	1.7673	1.8055	1.8621	1.8948	1.942	1.9854	1.9848	2.0123	2.0096	2.0181	2.034
OddandEven_rep2_BW10.125_p14	0.1101	0.0985	0.0972	0.0959	0.0945	0.0941	0.0935	0.0937	0.0929	0.0929	0.0927	0.0931	0.0934	0.0923	0.0927	0.0924	0.0916	0.0913	0.0912	0.0915	0.0912	0.0913	0.0909	0.0911	0.0904
OddandEven_rep2_BW20.125_p14	0.1136	0.1014	0.0996	0.0985	0.0972	0.0964	0.0958	0.0948	0.0948	0.0947	0.0942	0.0939	0.0935	0.093	0.0929	0.0929	0.0921	0.0923	0.0928	0.0921	0.092	0.0919	0.0916	0.0911	0.0918
OddandEven_rep2_Triclosan_resistant_BW0.125_p14	0.1051	0.0929	0.091	0.0901	0.0892	0.0958	0.1008	0.6845	1.133	1.3346	1.4756	1.6055	1.6592	1.6889	1.7148	1.7617	1.7988	1.8316	1.8536	1.8786	1.8951	1.9169	1.93	1.9428	1.9608
Even_rep2_ompX0.015_p14	0.1173	0.1051	0.1042	0.1104	0.2293	0.925	1.2743	1.5416	1.6226	1.7027	1.7721	1.8381	1.8876	1.9393	1.9658	1.988	1.9997	2.0049	2.0288	2.0459	2.057	2.0631	2.0719	2.0875	2.0948
Even_rep2_purH0.015_p14	0.1341	0.1476	0.1343	0.13	0.2097	0.8366	1.176	1.4541	1.5489	1.6283	1.702	1.77	1.8269	1.871	1.9212	1.9677	1.9985	2.0147	2.0445	2.0628	2.0653	2.0805	2.0842	2.0939	2.1091
Even_rep2_acrR0.015_p14	0.1169	0.1049	0.1032	0.11	0.206	0.9096	1.2534	1.4862	1.556	1.6378	1.7136	1.7969	1.8615	1.8991	1.9206	1.9494	1.9719	1.9769	1.9982	2.0138	2.0275	2.0324	2.0315	2.0469	2.0576
Even_rep2_kgtP0.015_p14	0.1034	0.0917	0.0897	0.0933	0.132	0.7007	1.0912	1.3575	1.4444	1.5585	1.6603	1.7427	1.8098	1.8325	1.8595	1.8918	1.8936	1.9328	1.9374	1.9559	1.9641	1.976	1.9912	2.0028	2.0099
Even_rep2_napD0.015_p14	0.1193	0.1047	0.1028	0.1069	0.1362	0.2498	0.4516	0.8611	1.1141	1.2662	1.4128	1.5505	1.6661	1.7644	1.8253	1.8856	1.9236	1.9552	1.9865	2.0137	2.031	2.0434	2.051	2.0777	2.0762
Even_rep2_pcnB0.015_p14	0.1257	0.1128	0.1106	0.1143	0.1531	0.4753	1.0266	1.2862	1.3999	1.55	1.6631	1.758	1.8317	1.8912	1.9262	1.9619	1.9874	2.0085	2.0274	2.0546	2.0661	2.0818	2.0839	2.1015	2.1139
Even_rep2_aroK0.015_p14	0.1229	0.1113	0.1099	0.1122	0.1401	0.5544	0.9922	1.1975	1.3928	1.4824	1.578	1.6587	1.7386	1.8093	1.8476	1.8961	1.917	1.9396	1.9698	1.9814	1.9956	2.0141	2.0193	2.0368	2.0406
Even_rep2_ynfD0.015_p14	0.1358	0.1247	0.1227	0.1279	0.2056	0.7906	1.191	1.449	1.5399	1.6125	1.6917	1.7627	1.8219	1.8837	1.9179	1.9498	1.9813	1.9889	2.0167	2.0342	2.0474	2.0552	2.062	2.0759	2.0877
OddandEven_rep2_SL13540.015_p14	0.1251	0.1135	0.1126	0.1107	0.1135	0.2064	0.5721	0.8097	0.9803	1.1698	1.2393	1.2349	1.2806	1.3471	1.4211	1.5003	1.5901	1.6874	1.6891	1.7048	1.729	1.7538	1.7585	1.7796	1.7842
OddandEven_rep2_SL7020.015_p14	0.1208	0.1092	0.1075	0.1078	0.1081	0.1362	0.8228	1.1033	1.2663	1.354	1.4259	1.5573	1.6933	1.8155	1.8898	1.9416	1.9686	1.9876	2.0047	2.0165	2.0258	2.036	2.0409	2.0599	2.0485
OddandEven_rep2_BW10.015_p14	0.1262	0.1154	0.1157	0.1215	0.2077	0.4468	0.7997	1.0602	1.204	1.2946	1.3686	1.4467	1.5084	1.5699	1.6323	1.6943	1.752	1.8041	1.8399	1.8754	1.8942	1.9117	1.9209	1.9309	1.9439
OddandEven_rep2_BW20.015_p14	0.1325	0.1208	0.1207	0.1298	0.2522	0.5157	0.8685	1.0696	1.2384	1.348	1.4387	1.5277	1.5963	1.6635	1.7225	1.7829	1.8439	1.8884	1.919	1.9443	1.9525	1.9712	1.9703	1.9898	2.0003
OddandEven_rep2_BW30.015_p14	0.1105	0.0995	0.0992	0.1086	0.2261	0.837	1.2041	1.3837	1.4894	1.5704	1.6414	1.703	1.7491	1.8032	1.8431	1.8859	1.9257	1.9614	1.9843	2.0061	2.0059	2.019	2.0206	2.0257	2.034
OddandEven_rep2_BW10.015_p14	0.1159	0.104	0.103	0.113	0.2515	0.6387	0.9454	1.1017	1.2422	1.3519	1.4443	1.5404	1.6114	1.6668	1.7192	1.7835	1.8474	1.8685	1.9013	1.929	1.9439	1.9572	1.9667	1.9747	1.9835
OddandEven_rep2_BW20.015_p14	0.1099	0.0978	0.0967	0.1039	0.1916	0.667	0.9763	1.181	1.323	1.4117	1.5153	1.5971	1.6635	1.7179	1.7666	1.8211	1.8668	1.8985	1.9236	1.9507	1.9631	1.9708	1.9822	1.9822	1.9993
OddandEven_rep2_Triclosan_resistant_BW0.015_p14	0.1097	0.0968	0.0957	0.101	0.1588	0.8551	1.2419	1.4073	1.4948	1.5689	1.6355	1.6861	1.725	1.7614	1.7937	1.8316	1.8557	1.8991	1.9142	1.9279	1.9355	1.9477	1.9564	1.9657	1.9767
Even_rep2_ompX_p14	0.1085	0.0965	0.0957	0.1004	0.1814	0.874	1.2042	1.3725	1.4875	1.5753	1.6386	1.6985	1.7564	1.7991	1.84	1.8937	1.9332	1.9676	1.9894	2.005	2.0115	2.0139	2.0134	2.029	2.0267
Even_rep2_purH_p14	0.1037	0.0915	0.0904	0.096	0.1519	0.4734	0.8286	1.1741	1.3543	1.4673	1.5486	1.6052	1.6513	1.6939	1.7389	1.8051	1.8595	1.8919	1.9201	1.9512	1.9623	1.9789	1.983	1.99	2.003
Even_rep2_acrR_p14	0.1095	0.1005	0.0996	0.1035	0.1772	0.5727	1.0173	1.2413	1.3769	1.4768	1.5595	1.6241	1.6789	1.7281	1.7763	1.8334	1.8761	1.9178	1.9428	1.9613	1.9795	1.985	1.9961	2.0063	2.0078
Even_rep2_kgtP_p14	0.1119	0.0992	0.0973	0.1012	0.1699	0.853	1.2354	1.3886	1.4781	1.5507	1.615	1.6699	1.7086	1.7476	1.7801	1.8338	1.871	1.9088	1.929	1.9403	1.9576	1.9707	1.9734	1.9833	1.9962
Even_rep2_napD_p14	0.1152	0.1022	0.1003	0.1064	0.1699	0.867	1.2568	1.4682	1.541	1.6224	1.7063	1.7799	1.8462	1.8763	1.9036	1.9319	1.9451	1.9664	1.9846	2.0005	2.0163	2.0205	2.0244	2.0474	2.0572
Even_rep2_pcnB_p14	0.1153	0.1057	0.1037	0.1052	0.1436	0.7039	1.1994	1.4446	1.5293	1.584	1.6503	1.7	1.7475	1.7982	1.8414	1.8677	1.8912	1.909	1.9371	1.9465	1.9615	1.9743	1.9846	2.0008	2.0021
Even_rep2_aroK_p14	0.1119	0.1022	0.1001	0.1027	0.1435	0.668	1.0871	1.339	1.4083	1.4795	1.5494	1.6176	1.6893	1.7539	1.801	1.8366	1.8631	1.8772	1.9044	1.9256	1.9452	1.9571	1.9675	1.9818	1.9926
Even_rep2_ynfD_p14	0.1087	0.0975	0.0958	0.0994	0.138	0.5832	1.0064	1.4666	1.5044	1.5845	1.6855	1.7601	1.8348	1.9004	1.9349	1.9665	1.9823	1.9989	2.0221	2.0492	2.0607	2.0635	2.0778	2.0894	2.0986
OddandEven_rep2_SL1354_p14	0.1147	0.1036	0.1012	0.103	0.126	0.6624	1.0601	1.375	1.442	1.5457	1.6321	1.7109	1.7974	1.8597	1.904	1.9405	1.9705	1.9891	2.0191	2.0401	2.0666	2.0681	2.0733	2.0927	2.101
OddandEven_rep2_SL702_p14	0.1102	0.0996	0.0974	0.0992	0.12	0.2781	1.0876	1.4139	1.5374	1.6236	1.712	1.7756	1.8321	1.8836	1.9222	1.9525	1.9731	1.997	2.0177	2.0354	2.0562	2.0609	2.075	2.0893	2.1025
OddandEven_rep2_BW1_p14	0.1106	0.0996	0.098	0.0988	0.1186	0.2859	0.8884	1.2089	1.3225	1.4292	1.544	1.624	1.706	1.7736	1.8214	1.8583	1.8872	1.9146	1.9563	1.9776	1.9977	2.0109	2.026	2.0386	2.056
OddandEven_rep2_BW2_p14	0.1125	0.1014	0.0989	0.0992	0.1229	0.4044	0.9744	1.3387	1.3657	1.451	1.5452	1.6026	1.6621	1.7198	1.7623	1.7928	1.8228	1.8454	1.8743	1.8923	1.9118	1.9183	1.9414	1.9523	1.9626
OddandEven_rep2_BW3_p14	0.1061	0.0957	0.0935	0.0972	0.1445	0.7354	1.175	1.4059	1.5005	1.5646	1.635	1.6933	1.7624	1.8248	1.8608	1.8968	1.9155	1.9352	1.9487	1.9674	1.9787	1.9945	1.9998	2.0088	2.0159
OddandEven_rep2_BW1_p14	0.1056	0.0946	0.0933	0.0965	0.1296	0.6402	1.0963	1.3701	1.4754	1.547	1.6275	1.6817	1.738	1.7928	1.8363	1.8685	1.9021	1.922	1.9471	1.9663	1.9867	1.9976	2.0125	2.0223	2.0396
OddandEven_rep2_BW2_p14	0.1034	0.0943	0.0932	0.0974	0.1474	0.7063	1.1022	1.3697	1.4591	1.543	1.6392	1.712	1.7842	1.821	1.8459	1.8842	1.9062	1.9229	1.9451	1.9633	1.9805	1.9869	1.9991	2.0155	2.0215
OddandEven_rep2_Triclosan_resistant_BW_p14	0.1046	0.093	0.0917	0.0943	0.1238	0.547	0.9971	1.2885	1.3897	1.4973	1.5999	1.6785	1.7296	1.7575	1.7818	1.8106	1.8385	1.8576	1.8846	1.9023	1.9196	1.9362	1.9497	1.9621	1.9757
Even_rep2_zntA0.5_p16	0.0829	0.0796	0.0795	0.0797	0.0807	0.0827	0.0834	0.085	0.0847	0.0841	0.0843	0.0846	0.0842	0.085	0.0844	0.0843	0.0838	0.0838	0.0838	0.0842	0.0841	0.0839	0.0839	0.0841	0.0836
Even_rep2_yhip0.5_p16	0.09	0.0863	0.0862	0.0859	0.086	0.0865	0.0874	0.0887	0.0892	0.0893	0.0889	0.089	0.0885	0.089	0.0889	0.0888	0.0886	0.0889	0.0883	0.0885	0.0882	0.0883	0.0883	0.0887	0.088
Even_rep2_phnP0.5_p16	0.0913	0.0896	0.0902	0.0907	0.0918	0.0902	0.0894	0.0915	0.0919	0.0909	0.0915	0.0913	0.0913	0.0919	0.092	0.0917	0.0916	0.0911	0.0904	0.0907	0.0908	0.0904	0.0907	0.0907	0.0899
Even_rep2_uhpT0.5_p16	0.0914	0.0899	0.089	0.0902	0.0903	0.0904	0.0905	0.0907	0.0893	0.088	0.0882	0.0881	0.088	0.0887	0.0888	0.0893	0.0895	0.0893	0.0888	0.0898	0.09	0.09	0.0904	0.0905	0.0905
Even_rep2_cutC0.5_p16	0.0919	0.0907	0.0907	0.0905	0.0909	0.0906	0.0911	0.0916	0.0911	0.0899	0.0913	0.0909	0.0913	0.0917	0.0916	0.091	0.0904	0.0892	0.0889	0.0903	0.0896	0.0903	0.0906	0.0908	0.09
Even_rep2_cstA0.5_p16	0.0945	0.0918	0.0917	0.0912	0.0923	0.0917	0.0925	0.0927	0.0929	0.0924	0.0921	0.0924	0.0922	0.0927	0.0925	0.0921	0.0924	0.0917	0.0918	0.0919	0.0915	0.0912	0.0912	0.0912	0.0908
Even_rep2_yjjQ0.5_p16	0.0924	0.0901	0.0901	0.0914	0.0913	0.0913	0.092	0.0923	0.0929	0.092	0.0922	0.0929	0.0962	0.0927	0.0928	0.0926	0.093	0.092	0.0916	0.0922	0.0916	0.0913	0.0913	0.0915	0.0912
Even_rep2_yjgL0.5_p16	0.0923	0.0886	0.0886	0.0883	0.089	0.0887	0.0888	0.089	0.0891	0.0888	0.0883	0.0891	0.0883	0.0893	0.0895	0.0894	0.0896	0.0903	0.0899	0.0899	0.0894	0.0896	0.0892	0.0894	0.0891
Even_rep2_glpT0.5_p16	0.1166	0.1125	0.1123	0.1119	0.1127	0.1126	0.1118	0.1118	0.1116	0.1116	0.1109	0.1125	0.1127	0.1141	0.1142	0.1141	0.1144	0.1148	0.1141	0.1143	0.1157	0.1138	0.1138	0.1146	0.1138
Even_rep2_mcrC0.5_p16	0.0897	0.0874	0.0885	0.0881	0.0886	0.0893	0.0883	0.0887	0.0896	0.0912	0.0914	0.0916	0.0915	0.0926	0.0924	0.0926	0.093	0.0931	0.093	0.0932	0.0936	0.0934	0.0935	0.093	0.0931
OddandEven_rep2_BW10.5_p16	0.0869	0.0823	0.0827	0.0826	0.0832	0.0836	0.0832	0.0832	0.0831	0.084	0.0833	0.0842	0.0843	0.0853	0.0856	0.0857	0.086	0.0863	0.0864	0.0865	0.0868	0.0869	0.0867	0.0867	0.0865
OddandEven_rep2_BW20.5_p16	0.0861	0.0826	0.0841	0.0837	0.0838	0.0852	0.0862	0.0865	0.0873	0.0877	0.0868	0.0879	0.0874	0.0881	0.0881	0.0878	0.0879	0.0879	0.0878	0.0884	0.0881	0.0881	0.088	0.0883	0.0879
OddandEven_rep2_BW30.5_p16	0.0855	0.0829	0.0837	0.0827	0.0848	0.0877	0.0884	0.089	0.0897	0.0892	0.0886	0.0891	0.0888	0.0892	0.0891	0.0887	0.0887	0.0886	0.0885	0.0889	0.0889	0.0889	0.0886	0.0888	0.0887
OddandEven_rep2_Triclosan_resistant_BW0.5_p16	0.0903	0.0884	0.0887	0.088	0.0897	0.0895	0.0937	0.0976	0.1063	0.1183	0.1343	0.1615	0.2024	0.3002	0.5292	0.73	0.9266	1.1192	1.2802	1.3719	1.4678	1.5524	1.6194	1.6771	1.7434
Even_rep2_zntA0.125_p16	0.0882	0.0851	0.0858	0.0856	0.0854	0.0856	0.0865	0.0866	0.0861	0.0858	0.0858	0.086	0.0855	0.0862	0.0864	0.0857	0.0859	0.0855	0.0855	0.0843	0.0853	0.0852	0.0847	0.0857	0.0859
Even_rep2_yhip0.125_p16	0.0911	0.089	0.0885	0.0882	0.0889	0.0883	0.0888	0.0882	0.0886	0.0878	0.0881	0.0899	0.0886	0.0891	0.0956	0.2703	0.53	0.7483	1.2044	1.4449	1.5534	1.6378	1.7267	1.7854	1.8593
Even_rep2_phnP0.125_p16	0.11	0.1075	0.1075	0.1069	0.1073	0.108	0.1078	0.1087	0.11	0.1127	0.1581	0.4635	0.7469	1.1885	1.368	1.5164	1.6261	1.7264	1.8097	1.8655	1.9236	1.9646	2.008	2.0477	2.0744
Even_rep2_uhpT0.125_p16	0.0947	0.0928	0.093	0.095	0.0937	0.0936	0.0938	0.0944	0.0941	0.0933	0.093	0.0939	0.0936	0.094	0.0938	0.0936	0.0936	0.0935	0.0934	0.0936	0.0935	0.0936	0.0933	0.0934	0.0929
Even_rep2_cutC0.125_p16	0.1017	0.1003	0.1	0.0997	0.1006	0.1012	0.1032	0.1014	0.1015	0.1006	0.1013	0.1022	0.1015	0.1021	0.1023	0.1026	0.1021	0.1021	0.102	0.1024	0.1021	0.1021	0.102	0.1022	0.1007
Even_rep2_cstA0.125_p16	0.0947	0.0933	0.0929	0.0941	0.0947	0.0948	0.0948	0.0951	0.0957	0.0958	0.0964	0.0966	0.0963	0.0966	0.0973	0.0968	0.0972	0.0964	0.0966	0.0967	0.096	0.0954	0.0941	0.0935	0.0921
Even_rep2_yjjQ0.125_p16	0.0956	0.0941	0.0938	0.0942	0.0953	0.0959	0.0964	0.0967	0.0961	0.0947	0.0951	0.0961	0.0972	0.0987	0.1073	0.1772	0.3319	0.5638	0.7715	0.927	1.074	1.1919	1.279	1.329	1.3415
Even_rep2_yjgL0.125_p16	0.0894	0.0878	0.088	0.0879	0.0885	0.0893	0.0897	0.0896	0.0889	0.0882	0.0887	0.0945	0.1922	0.3777	0.5829	0.7508	0.9593	1.1522	1.2669	1.4524	1.5873	1.653	1.7027	1.7407	1.7846
Even_rep2_glpT0.125_p16	0.0966	0.0942	0.0949	0.0946	0.0946	0.0955	0.0977	0.097	0.099	0.1166	0.2132	0.4112	0.626	0.7694	1.0297	1.2852	1.464	1.5671	1.6417	1.6901	1.7373	1.7843	1.835	1.8827	1.9394
Even_rep2_mcrC0.125_p16	0.1208	0.1191	0.1199	0.1197	0.1208	0.1209	0.1209	0.1207	0.1211	0.1207	0.1201	0.1397	0.2622	0.4706	0.6903	0.9755	1.177	1.2687	1.3629	1.4875	1.6035	1.6744	1.7225	1.7717	1.8362
OddandEven_rep2_BW10.125_p16	0.1535	0.1526	0.1513	0.1512	0.152	0.152	0.1524	0.1531	0.1529	0.1507	0.1484	0.1478	0.1474	0.1547	0.2329	0.8215	1.1599	1.3629	1.504	1.5964	1.6729	1.7435	1.8055	1.8589	1.9009
OddandEven_rep2_BW20.125_p16	0.0933	0.0918	0.092	0.0919	0.0923	0.0921	0.0925	0.0925	0.0922	0.0918	0.091	0.0909	0.0902	0.0905	0.0906	0.0908	0.0915	0.092	0.0921	0.0921	0.0918	0.0917	0.0915	0.0915	0.091
OddandEven_rep2_BW30.125_p16	0.0994	0.0971	0.097	0.0969	0.0974	0.0979	0.0986	0.099	0.1038	0.1173	0.1542	0.2967	0.38	0.4703	0.4884	0.8103	1.1283	1.3524	1.5226	1.6605	1.7505	1.8297	1.8777	1.9204	1.9488
OddandEven_rep2_Triclosan_resistant_BW0.125_p16	0.0904	0.0877	0.088	0.0874	0.0878	0.0903	0.0929	0.1269	0.6153	1.2039	1.4016	1.5208	1.5777	1.6293	1.6816	1.7194	1.7504	1.7944	1.8317	1.8422	1.8673	1.8923	1.9016	1.9192	1.9294
Even_rep2_zntA0.015_p16	0.0909	0.0894	0.0906	0.095	0.1318	0.7771	1.153	1.3436	1.4877	1.5512	1.6244	1.6956	1.7595	1.7934	1.8342	1.8556	1.8817	1.8961	1.9147	1.9088	1.9076	1.9146	1.9224	1.9187	1.9219
Even_rep2_yhip0.015_p16	0.0878	0.0857	0.0861	0.0892	0.1225	0.754	1.1422	1.3355	1.4434	1.537	1.6449	1.7039	1.7728	1.8267	1.8624	1.8556	1.8569	1.8761	1.8883	1.8919	1.9014	1.9148	1.9244	1.9234	1.9346
Even_rep2_phnP0.015_p16	0.0971	0.0945	0.0958	0.1029	0.1974	0.927	1.2022	1.3936	1.4814	1.5942	1.6844	1.7768	1.7888	1.8289	1.861	1.8818	1.8993	1.9151	1.9355	1.9381	1.941	1.9422	1.954	1.9542	1.9592
Even_rep2_uhpT0.015_p16	0.0943	0.0932	0.0946	0.1075	0.2906	0.9645	1.1254	1.3907	1.4783	1.5904	1.6815	1.7688	1.7993	1.8312	1.8678	1.8917	1.9176	1.9306	1.9464	1.9479	1.959	1.9567	1.9625	1.964	1.9697
Even_rep2_cutC0.015_p16	0.0899	0.0881	0.0885	0.0959	0.1764	0.9209	1.1404	1.3741	1.4562	1.5373	1.6115	1.6782	1.7111	1.751	1.7692	1.7949	1.8143	1.8273	1.8412	1.8482	1.854	1.8584	1.8657	1.8645	1.8753
Even_rep2_cstA0.015_p16	0.0933	0.0922	0.0928	0.0994	0.1696	0.8703	1.0631	1.2537	1.3716	1.4991	1.6134	1.7106	1.7576	1.8029	1.846	1.8686	1.8846	1.9071	1.9192	1.9351	1.943	1.9443	1.9556	1.9503	1.9635
Even_rep2_yjjQ0.015_p16	0.095	0.0935	0.0945	0.1017	0.1899	0.7052	1.1213	1.3992	1.492	1.5552	1.6265	1.7088	1.7429	1.7924	1.8244	1.8546	1.8732	1.8887	1.9017	1.9068	1.9208	1.918	1.9317	1.9293	1.9413
Even_rep2_yjgL0.015_p16	0.0914	0.0903	0.0913	0.0994	0.2148	0.9508	1.3018	1.4946	1.5632	1.6293	1.7038	1.7833	1.8033	1.8317	1.857	1.8829	1.8949	1.9099	1.928	1.9292	1.9359	1.9353	1.9458	1.9437	1.9548
Even_rep2_glpT0.015_p16	0.0988	0.0971	0.0984	0.1059	0.1906	0.8927	1.2487	1.4708	1.5522	1.6145	1.6817	1.7516	1.808	1.8321	1.8653	1.8844	1.9052	1.9206	1.943	1.945	1.9573	1.9557	1.9639	1.9641	1.9708
Even_rep2_mcrC0.015_p16	0.0926	0.0906	0.0917	0.0979	0.1691	0.8806	1.1225	1.3588	1.4437	1.5279	1.6223	1.7153	1.7799	1.8343	1.881	1.8918	1.9088	1.9254	1.9457	1.9526	1.9613	1.9655	1.9777	1.9801	1.9843
OddandEven_rep2_BW10.015_p16	0.0883	0.0882	0.0924	0.0966	0.1674	0.5671	0.877	1.125	1.261	1.3644	1.4461	1.5326	1.5939	1.6421	1.6731	1.7044	1.7356	1.7508	1.779	1.7887	1.7999	1.8066	1.8131	1.8075	1.8136
OddandEven_rep2_BW20.015_p16	0.0848	0.0847	0.0855	0.0927	0.1781	0.811	1.1135	1.2832	1.4045	1.4842	1.5576	1.6259	1.6882	1.7304	1.7681	1.7978	1.831	1.8477	1.8663	1.8602	1.8742	1.8672	1.8732	1.8688	1.8736
OddandEven_rep2_BW30.015_p16	0.084	0.0832	0.0858	0.0933	0.1682	0.868	1.225	1.4317	1.5553	1.612	1.6711	1.7346	1.7916	1.8276	1.8648	1.8899	1.8964	1.9039	1.9109	1.9119	1.9191	1.9247	1.9306	1.9351	1.943
OddandEven_rep2_Triclosan_resistant_BW0.015_p16	0.0816	0.0803	0.0803	0.084	0.1278	0.5128	1.0825	1.3239	1.4279	1.5017	1.5597	1.6218	1.6704	1.7153	1.7364	1.7617	1.7774	1.7855	1.8094	1.8157	1.8354	1.8349	1.8425	1.8451	1.8439
Even_rep2_zntA_p16	0.086	0.085	0.0853	0.0915	0.125	0.627	1.1226	1.329	1.4639	1.5323	1.6093	1.6818	1.7472	1.7877	1.8169	1.8459	1.8622	1.8827	1.9026	1.9113	1.9201	1.9277	1.9345	1.9339	1.9517
Even_rep2_yhip_p16	0.0818	0.082	0.0829	0.0853	0.108	0.7232	1.0953	1.2842	1.3824	1.4901	1.5995	1.6995	1.7896	1.8435	1.8886	1.9206	1.9288	1.9504	1.9656	1.9711	1.9878	1.9905	1.9998	2.011	2.0191
Even_rep2_phnP_p16	0.0989	0.0981	0.1003	0.1075	0.1632	0.9171	1.136	1.3333	1.4394	1.5388	1.6342	1.731	1.7714	1.8202	1.8583	1.8805	1.897	1.9102	1.937	1.9406	1.9552	1.9595	1.9653	1.9701	1.9762
Even_rep2_uhpT_p16	0.0856	0.086	0.0869	0.0914	0.1547	0.8706	1.0293	1.2854	1.4043	1.5155	1.6117	1.696	1.7452	1.793	1.8289	1.8593	1.874	1.8991	1.9155	1.9203	1.9326	1.9429	1.9448	1.9533	1.9579
Even_rep2_cutC_p16	0.0853	0.0853	0.0861	0.0889	0.1328	0.8499	1.0998	1.3203	1.4288	1.5225	1.603	1.6748	1.7127	1.7479	1.7819	1.8089	1.8207	1.8387	1.8576	1.8614	1.8735	1.8792	1.8868	1.8924	1.902
Even_rep2_cstA_p16	0.0802	0.0798	0.0805	0.0844	0.124	0.7239	0.9155	1.058	1.2361	1.3995	1.533	1.6232	1.6813	1.7368	1.7701	1.8069	1.8257	1.8444	1.8671	1.8773	1.8929	1.8941	1.9058	1.9107	1.9201
Even_rep2_yjjQ_p16	0.0868	0.0853	0.0863	0.0907	0.1281	0.4677	1.0208	1.3083	1.4324	1.5071	1.5839	1.6668	1.721	1.7638	1.7969	1.825	1.8405	1.8576	1.883	1.8926	1.9038	1.9099	1.9225	1.9279	1.936
Even_rep2_yjgL_p16	0.0896	0.0894	0.092	0.0962	0.1271	0.7898	1.1968	1.3968	1.4946	1.5714	1.653	1.73	1.7726	1.8041	1.8383	1.8598	1.8744	1.8922	1.9095	1.918	1.9258	1.9327	1.9423	1.9461	1.9499
Even_rep2_glpT_p16	0.0823	0.0816	0.0833	0.0902	0.1209	0.5512	1.1112	1.3491	1.4412	1.524	1.6042	1.6824	1.749	1.7864	1.8191	1.8471	1.8706	1.8852	1.9111	1.9182	1.9258	1.9303	1.9367	1.9469	1.9469
Even_rep2_mcrC_p16	0.0872	0.0868	0.0888	0.0954	0.124	0.5497	0.9782	1.2649	1.34	1.4577	1.5617	1.6558	1.7081	1.7532	1.7898	1.8153	1.834	1.8489	1.8652	1.8868	1.8943	1.9015	1.9174	1.9228	1.9288
OddandEven_rep2_BW1_p16	0.0796	0.0781	0.0788	0.0855	0.1323	0.3916	0.7907	1.1387	1.2589	1.366	1.4543	1.5365	1.612	1.6437	1.6725	1.7019	1.7272	1.7431	1.7692	1.7827	1.8003	1.7985	1.8155	1.8152	1.8237
OddandEven_rep2_BW2_p16	0.0779	0.077	0.0776	0.0823	0.1114	0.6159	1.0489	1.2941	1.411	1.4948	1.5744	1.6429	1.6917	1.7262	1.7545	1.7721	1.7898	1.8036	1.8143	1.8238	1.8284	1.8269	1.8421	1.8478	1.8587
OddandEven_rep2_BW3_p16	0.0807	0.0814	0.0823	0.0865	0.1326	0.7225	1.1593	1.3934	1.5118	1.568	1.6262	1.6923	1.7489	1.7806	1.8049	1.8119	1.8101	1.8322	1.8516	1.8735	1.8753	1.8796	1.8919	1.901	1.9159
OddandEven_rep2_Triclosan_resistant_BW_p16	0.0883	0.0884	0.0887	0.0912	0.1053	0.3863	1.1103	1.3815	1.4866	1.5551	1.6115	1.6662	1.7058	1.7503	1.7915	1.8275	1.8402	1.8591	1.8679	1.8834	1.8976	1.8998	1.9183	1.9253	1.9259
